# Supplementary material for: Expression Profile in Rice Panicle: Insights into Heat Response Mechanism at Reproductive Stage
Source: PLoS One. 2012 Nov 14;7(11):e49652. doi: 10.1371/journal.pone.0049652 (PMC3498232; doi:10.1371/journal.pone.0049652)
Supplement: Table S1 — Correlation coefficient of microarray replicates. (XLS) [file pone.0049652.s001.xls]

## Sheet: correlation_coefficient
Table S1 Correlation coefficient of microarray replicates
Array Name	p-CK-1	p-CK-2	p-20min-1	p-20min-2	p-60min-1	p-60min-2	p-2h-1	p-2h-2	p-4h-1	p-4h-2	p-8h-1	p-8h-2
p-CK-1	1	0.994484	0.875306	0.878073	0.873831	0.869642	0.906929	0.905125	0.908951	0.904801	0.914628	0.908887
p-CK-2	0.994484	1	0.872385	0.875637	0.869596	0.863576	0.900757	0.89814	0.899321	0.895351	0.902671	0.895636
p-20 min-1	0.875306	0.872385	1	0.994115	0.966177	0.967558	0.929098	0.928228	0.870713	0.874682	0.846694	0.835606
p-20 min-2	0.878073	0.875637	0.994115	1	0.968863	0.971731	0.934566	0.934753	0.875782	0.880041	0.853115	0.842889
p-60 min-1	0.873831	0.869596	0.966177	0.968863	1	0.993435	0.969162	0.968147	0.908108	0.911254	0.877372	0.867744
p-60 min-2	0.869642	0.863576	0.967558	0.971731	0.993435	1	0.971146	0.968041	0.905479	0.909412	0.876175	0.866592
p-2 h-1	0.906929	0.900757	0.929098	0.934566	0.969162	0.971146	1	0.994942	0.953415	0.955193	0.928221	0.920457
p-2 h-2	0.905125	0.89814	0.928228	0.934753	0.968147	0.968041	0.994942	1	0.950052	0.951098	0.925351	0.920592
p-4 h-1	0.908951	0.899321	0.870713	0.875782	0.908108	0.905479	0.953415	0.950052	1	0.998032	0.986099	0.982219
p-4 h-2	0.904801	0.895351	0.874682	0.880041	0.911254	0.909412	0.955193	0.951098	0.998032	1	0.984833	0.980451
p-8 h-1	0.914628	0.902671	0.846694	0.853115	0.877372	0.876175	0.928221	0.925351	0.986099	0.984833	1	0.996009
p-8 h-2	0.908887	0.895636	0.835606	0.842889	0.867744	0.866592	0.920457	0.920592	0.982219	0.980451	0.996009	1
