# Supplementary material for: Expression Profile in Rice Panicle: Insights into Heat Response Mechanism at Reproductive Stage
Source: PLoS One. 2012 Nov 14;7(11):e49652. doi: 10.1371/journal.pone.0049652 (PMC3498232; doi:10.1371/journal.pone.0049652)
Supplement: Table S3 — The HR genes on the time course of heat stress. (XLSX) [file pone.0049652.s003.xlsx]

## Sheet: Sheet1
Table S3 The HR genes on the time course of heat stress
ProbeName	RAP_ID	Annotation (Build 5)	ratio-20 min	ratio-60 min	ratio-2 h	ratio-4 h	ratio-8 h
Os01g0101800|mRNA|AK103498|CDS+3'UTR	Os01g0101800	Conserved hypothetical protein.	0.586786	0.164061	0.201998	0.376962	0.29974
Os01g0102900|mRNA|AK067670|CDS+3'UTR	Os01g0102900	Light regulated Lir1 family protein.	0.593896	2.68167	6.18188	11.2167	7.28676
Os01g0102900|mRNA|AK120535|CDS+3'UTR	Os01g0102900	Light regulated Lir1 family protein.	0.397785	2.31691	4.85488	21.3958	14.368
Os01g0102900|mRNA|X68807|CDS+3'UTR	Os01g0102900	Light regulated Lir1 family protein.	0.56793	1.71508	3.52046	6.33631	5.40593
Os01g0103600|mRNA|AK059848|CDS+3'UTR	Os01g0103600	Emopamil-binding family protein.	0.77763	0.461035	0.368745	0.229595	0.278816
Os01g0105800|mRNA|AK066672|CDS+3'UTR	Os01g0105800	Similar to Iron sulfur assembly protein 1.	8.57146	8.28439	4.65916	1.89875	1.38159
Os01g0108800|mRNA|AK102103|CDS+3'UTR	Os01g0108800	Protein of unknown function DUF936, plant family protein.	0.563899	0.198772	0.15324	0.0727983	0.119329
Os01g0110400|mRNA|AK101017|CDS+3'UTR	Os01g0110400	Similar to Acetyl-CoA C-acetyltransferase.	1.31648	3.62555	4.64225	2.70699	2.09196
Os01g0110400|mRNA|AK103194|CDS+3'UTR	Os01g0110400	Similar to Acetyl-CoA C-acetyltransferase.	1.3932	3.65138	4.68561	2.90712	2.17858
Os01g0112400|mRNA|AK106825|CDS+3'UTR	Os01g0112400	Major intrinsic protein family protein.	0.130326	0.0751019	1.91666	3.0284	5.29183
Os01g0118400|COMBINER_EST|CI551307|0	Os01g0118400	Similar to HGA6.	0.269157	0.267242	0.51862	1.11502	0.962676
Os01g0121000|COMBINER|CI251397|6	Os01g0121000	Conserved hypothetical protein.	6.87948	7.33791	13.6723	5.76126	5.40781
Os01g0123500|COMBINER_EST|Os01g0123500|8			6.83222	5.31233	2.57297	1.52917	1.20804
Os01g0124400|mRNA|AB098712|CDS+3'UTR			0.604406	1.5361	4.67015	7.78737	6.94937
Os01g0124400|mRNA|AK064050|CDS+3'UTR	Os01g0124650	Hypothetical conserved gene.	0.548981	0.93248	7.08046	11.0658	17.6126
Os01g0124400|mRNA|AK099279|CDS+3'UTR	Os01g0124650	Hypothetical conserved gene.	0.529324	0.86039	6.8955	10.2174	16.6787
Os01g0124400|mRNA|U57640|CDS+3'UTR			0.602172	1.62662	5.0452	7.81266	7.0573
Os01g0124400|mRNA|U76004|CDS+3'UTR			0.609238	1.57947	4.81466	7.68452	6.78135
Os01g0126200|mRNA|AK121464|CDS+3'UTR	Os01g0126200	Conserved hypothetical protein.	0.653256	0.575493	0.475361	0.26681	0.256865
Os01g0128200|mRNA|AK059608|CDS+3'UTR	Os01g0128200	Similar to Nuclease I.	0.537624	0.395862	1.59377	5.52659	7.35205
Os01g0128300|COMBINER_EST|CB656727|7	Os01g0128300	Similar to predicted protein.	2.29137	3.09499	3.52455	1.65366	1.61539
Os01g0132000|mRNA|AB059238|CDS+3'UTR	Os01g0132000	Similar to Wound-induced protease inhibitor (WIP1).	0.43296	0.894517	1.59951	3.44278	4.09875
Os01g0132400|mRNA|AK106795|CDS+3'UTR	Os01g0132400	Conserved hypothetical protein.	0.408153	0.287674	0.713821	0.116339	0.239989
Os01g0132800|mRNA|AK068422|CDS+3'UTR	Os01g0132800	Peptidyl-tRNA hydrolase family protein.	1.11903	0.469757	0.347069	0.269018	0.221793
Os01g0133200|mRNA|AK060424|CDS+3'UTR	Os01g0133200	Conserved hypothetical protein.	0.843069	0.389856	0.339347	0.20268	0.327787
Os01g0134700|mRNA|AK111442|CDS+3'UTR	Os01g0134700	Calmodulin binding protein-like family protein.	9.67936	8.42047	1.47432	2.32695	1.82028
Os01g0135800|mRNA|AK063681|CDS+3'UTR	Os01g0135800	Similar to Cytosolic class I small heat shock protein 3B (Fragment).	155.381	344.191	165.469	24.0849	8.10329
Os01g0135900|mRNA|AK119599|CDS+3'UTR	Os01g0135900	LMW heat shock protein.	0.454547	1.04708	2.13488	3.30209	3.60124
Os01g0136000|COMBINER_EST|CI053053|0	Os01g0136000	Similar to Cytosolic class I small heat-shock protein HSP17.5.	18.7695	20.1978	19.5785	13.8847	6.22656
Os01g0136100|mRNA|X60820|CDS+3'UTR	Os01g0136100	16.9 kDa class I heat shock protein 1.	11.9465	13.4389	13.0541	12.396	8.1436
Os01g0136200|mRNA|AK121025|CDS+3'UTR	Os01g0136200	16.9 kDa class I heat shock protein 1.	30.8109	25.7106	22.3	11.7774	4.06163
Os01g0136300|mRNA|AK062428|CDS+3'UTR	Os01g0136300	Conserved hypothetical protein.	0.563836	0.23183	0.263197	0.376919	0.749271
Os01g0136400|mRNA|AK065470|CDS+3'UTR	Os01g0136400	Protein kinase, core domain containing protein.	2.74013	3.70092	2.96818	2.82277	3.10975
Os01g0143900|mRNA|AK120731|UTR	Os01g0143900	Conserved hypothetical protein.	0.340334	1.48867	3.51646	4.03782	4.35947
Os01g0144800|mRNA|AK110697|CDS+3'UTR	Os01g0144800	Conserved hypothetical protein.	19.423	32.6881	16.6881	4.90362	1.1825
Os01g0149200|mRNA|AK069318|CDS+3'UTR	Os01g0149200	Hypothetical gene.	3.91603	16.0611	12.6291	12.2474	7.87239
Os01g0149800|mRNA|AJ417527|UTR	Os01g0149800	Metallothionein-like protein type 2.	4.18639	17.076	12.4222	12.8693	7.86153
Os01g0149800|mRNA|U43530|CDS+3'UTR	Os01g0149800	Metallothionein-like protein type 2.	5.21086	24.011	17.5272	13.6497	7.04083
Os01g0157200|mRNA|AK108577|CDS+3'UTR	Os01g0157200	Conserved hypothetical protein.	0.7363	0.461783	0.585252	0.167419	0.145622
Os01g0159200|mRNA|AK108308|CDS+3'UTR	Os01g0159200	Conserved hypothetical protein.	0.235295	0.247895	0.404327	0.728011	1.59289
Os01g0159400|mRNA|AK100550|CDS+3'UTR	Os01g0159400	Similar to Acyl-coenzyme A oxidase 4, peroxisomal (EC 1.3.3.6) (AOX 4) (Short- chain acyl-CoA oxidase) (SAOX) (AtCX4) (G6p) (AtG6).	4.36406	4.35658	3.31569	2.30607	1.25315
Os01g0160100|mRNA|AK069905|CDS+3'UTR	Os01g0160100	Similar to Pyruvate decarboxylase isozyme 2 (EC 4.1.1.1) (PDC) (Fragment).	8.64831	16.3385	10.2136	5.96408	3.71586
Os01g0166400|COMBINER_EST|CI394036|6	Os01g0166400	Hypothetical conserved gene.	0.612199	0.375471	0.287347	0.282193	0.357379
Os01g0166800|mRNA|AK073783|CDS+3'UTR	Os01g0166800	Conserved hypothetical protein.	1.17621	0.268763	0.24954	0.661836	0.524269
Os01g0166800|mRNA|AK099378|CDS+3'UTR	Os01g0166800	Conserved hypothetical protein.	1.19657	0.263511	0.246675	0.636642	0.514508
Os01g0167400|mRNA|AK120073|CDS+3'UTR	Os01g0167400	Similar to Protein synthesis inhibitor II (EC 3.2.2.22) (Ribosome-inactivating protein II) (rRNA N-glycosidase).	0.904374	3.39552	4.41318	1.87869	2.28884
Os01g0168800|COMBINER_EST|CI140856|6	Os01g0168800	Alpha/beta hydrolase fold-1 domain containing protein.	0.307015	0.269297	0.569684	0.653523	0.931532
Os01g0170000|mRNA|AK061224|CDS+3'UTR	Os01g0170000	Raffinose synthase family protein.	138.082	113.17	25.2193	4.51301	2.48742
Os01g0170600|mRNA|AK067202|CDS+3'UTR	Os01g0170600	UspA domain containing protein.	0.764714	2.08395	2.62261	3.66011	4.49163
Os01g0171200|mRNA|AK107515|CDS+3'UTR	Os01g0171200	Conserved hypothetical protein.	0.840288	0.42845	0.460737	0.129345	0.207659
Os01g0171800|mRNA|AK067987|CDS+3'UTR	Os01g0171800	Conserved hypothetical protein.	3.20906	3.08176	1.31449	0.661087	0.503757
Os01g0172100|mRNA|AK060343|CDS+3'UTR	Os01g0172100	Similar to Triose phosphate/phosphate translocator, non-green plastid, chloroplast precursor (CTPT).	2.13692	3.82541	4.42402	0.890414	0.894483
Os01g0174900|mRNA|AK060966|CDS+3'UTR	Os01g0174900	Thioredoxin fold domain containing protein.	1.47293	1.60999	1.84339	7.04275	5.36201
Os01g0174900|mRNA|AK104777|CDS+3'UTR	Os01g0174900	Thioredoxin fold domain containing protein.	1.66592	1.64599	1.86499	6.82987	5.29955
Os01g0175300|COMBINER_EST|Os01g0175300|8			16.5278	23.7327	5.6039	2.25447	0.985572
Os01g0175400|mRNA|AK102191|CDS+3'UTR	Os01g0175400	Ankyrin repeat containing protein.	2.56758	3.68755	3.70691	5.65196	4.11918
Os01g0175600|mRNA|AK072421|CDS+3'UTR	Os01g0175600	Bicarbonate transporter, eukaryotic domain containing protein.	1.44869	0.808798	0.35642	0.223667	0.227737
Os01g0176500|mRNA|AK064369|CDS+3'UTR	Os01g0176500	Hypothetical conserved gene.	0.833789	0.150542	0.215814	0.096468	0.246861
Os01g0176500|mRNA|AK102552|CDS+3'UTR	Os01g0176500	Conserved hypothetical protein.	0.837679	0.156143	0.219236	0.0954113	0.247003
Os01g0180800|mRNA|AK059244|5'UTR+CDS	Os01g0180800	Similar to heat shock 70 kDa protein 4.	14.6839	5.53027	2.11533	1.07444	0.568739
Os01g0182600|mRNA|AK067038|CDS+3'UTR	Os01g0182600	GIGANTEA protein.	0.6171	0.585604	0.990712	3.44848	3.29844
Os01g0182600|mRNA|AK100147|5'UTR+CDS	Os01g0182600	Similar to Protein GIGANTEA.	0.626976	0.531935	1.10847	3.42997	3.37391
Os01g0183300|mRNA|AK110423|CDS+3'UTR	Os01g0183300	Endonuclease/exonuclease/phosphatase domain containing protein.	9.10828	8.74849	2.1564	0.750345	0.902443
Os01g0183400|COMBINER_EST|Os01g0183400|8	Os01g0183400	Histone-fold domain containing protein.	0.99595	0.378979	0.316841	0.19744	0.247668
Os01g0183700|COMBINER|CI141568|6	Os01g0183700	Zinc finger, RING/FYVE/PHD-type domain containing protein.	1.27482	0.698578	0.333651	0.304857	0.269066
Os01g0184100|mRNA|AK071240|CDS+3'UTR	Os01g0184100	Similar to 17.5 kDa class II heat shock protein.	8.04395	7.88171	7.92824	7.24002	4.73646
Os01g0185400|mRNA|AK112064|CDS+3'UTR	Os01g0185400	WD40 repeat-like domain containing protein.	1.08938	1.4334	2.05065	3.41081	4.04894
Os01g0187900|mRNA|AK071611|CDS+3'UTR	Os01g0187900	Similar to Transcription factor MYBS2.	3.33129	2.5502	2.64182	3.43199	2.19822
Os01g0190500|mRNA|AK119868|CDS+3'UTR	Os01g0190500	IQ calmodulin-binding region domain containing protein.	0.350965	0.284442	0.329656	0.237364	0.328776
Os01g0191200|mRNA|AK060964|CDS+3'UTR	Os01g0191200	Similar to Acid phosphatase.	0.235777	0.262856	0.556499	1.87434	1.90595
Os01g0191200|mRNA|AK061466|CDS+3'UTR	Os01g0191200	Similar to Acid phosphatase.	0.300465	0.322327	0.790754	1.26302	1.45043
Os01g0191200|mRNA|AK100363|CDS+3'UTR	Os01g0191200	Similar to Acid phosphatase.	0.306114	0.313235	0.728104	1.23937	1.45421
Os01g0191200|mRNA|AK104183|CDS+3'UTR	Os01g0191200	Similar to Acid phosphatase.	0.293239	0.310296	0.718016	1.25659	1.41176
Os01g0191200|mRNA|AK104471|CDS+3'UTR	Os01g0191200	Similar to Acid phosphatase.	0.277743	0.313939	0.73204	1.23624	1.39303
Os01g0191200|mRNA|AK109404|CDS+3'UTR	Os01g0191200	Similar to Acid phosphatase.	0.278866	0.288424	0.743332	1.25876	1.4129
Os01g0191700|mRNA|AK121093|CDS+3'UTR	Os01g0191700	Similar to Pyrophosphate-fructose-6-phosphate 1-phosphotransferase-like protein (Pyrophosphate-dependent phosphofructo-1-kinase-like protein).	4.59085	5.63754	3.56689	1.8592	1.43855
Os01g0191800|mRNA|AK061360|CDS+3'UTR	Os01g0191800	Similar to Serine/threonine-protein kinase 12 (EC 2.7.1.37) (Aurora-B) (Fragment).	1.08141	0.258618	0.272091	0.133555	0.241838
Os01g0191800|mRNA|AK102360|CDS+3'UTR	Os01g0191800	Similar to Serine/threonine-protein kinase 12 (EC 2.7.1.37) (Aurora-B) (Fragment).	1.04954	0.249278	0.27143	0.126578	0.248697
Os01g0195200|mRNA|AK105501|CDS+3'UTR	Os01g0195200	Similar to Serine/threonine-protein kinase PBS1 (EC 2.7.1.37) (AvrPphB susceptible protein 1).	0.569087	0.248105	0.136317	0.0946858	0.0850802
Os01g0198900|mRNA|AK060553|CDS+3'UTR	Os01g0198900	Conserved hypothetical protein.	0.350821	0.42079	0.30052	0.255537	0.22577
Os01g0198900|mRNA|AK069974|CDS+3'UTR	Os01g0198900	Conserved hypothetical protein.	0.336503	0.379718	0.241243	0.174733	0.175614
Os01g0198900|mRNA|AK099171|CDS+3'UTR	Os01g0198900	Conserved hypothetical protein.	0.349946	0.420055	0.303244	0.249244	0.222988
Os01g0201800|COMBINER|AU100708|6	Os01g0201800	Hypothetical conserved gene.	8.68985	3.67712	1.8888	1.50902	0.658349
Os01g0202500|COMBINER_EST|CI026916|0	Os01g0202500	Similar to B-box zinc finger family protein.	0.714844	1.05875	1.60899	4.36115	4.1788
Os01g0204000|mRNA|AK067829|CDS+3'UTR	Os01g0204000	Hypothetical conserved gene.	7.60523	7.05125	4.10618	3.61815	2.62438
Os01g0204000|mRNA|AK101188|CDS+3'UTR	Os01g0204000	Conserved hypothetical protein.	7.08442	6.27002	3.38945	3.14298	2.3474
Os01g0204000|mRNA|AK101572|CDS+3'UTR	Os01g0204000	Conserved hypothetical protein.	7.63542	7.54806	4.05283	3.72745	2.65179
Os01g0207600|COMBINER_EST|Os01g0207600|8	Os01g0207600	Conserved hypothetical protein.	0.237125	0.492591	0.625151	0.333021	0.423959
Os01g0208400|mRNA|AK105750|CDS+3'UTR	Os01g0208400	Conserved hypothetical protein.	0.201712	0.174317	0.44018	0.507336	0.869351
Os01g0208600|mRNA|AK104676|CDS+3'UTR	Os01g0208600	Actin-binding WH2 domain containing protein.	0.647354	0.48563	0.346525	0.326709	0.318629
Os01g0209500|mRNA|AK072686|CDS+3'UTR	Os01g0209500	Nucleotide-binding, alpha-beta plait domain containing protein.	4.78861	3.04117	2.02369	1.52623	1.1665
Os01g0210300|mRNA|AK106937|CDS+3'UTR	Os01g0210300	Conserved hypothetical protein.	0.730524	0.480157	0.411558	0.208572	0.219341
Os01g0214600|mRNA|AK103614|CDS+3'UTR	Os01g0214600	Lipase, GDSL domain containing protein.	0.324229	0.319109	0.37899	0.413644	0.595533
Os01g0214800|mRNA|AK065001|CDS+3'UTR	Os01g0214800	Lipase, GDSL domain containing protein.	1.04963	1.3984	3.02177	2.34326	3.98623
Os01g0214800|mRNA|AK104740|CDS+3'UTR	Os01g0214800	Similar to esterase.	1.14248	1.51036	3.29703	2.57365	4.39561
Os01g0217500|mRNA|AK063270|CDS+3'UTR	Os01g0217500	ThiJ/PfpI domain containing protein.	0.323711	0.207313	0.417171	0.465274	0.702351
Os01g0219200|mRNA|AK108579|CDS+3'UTR	Os01g0219200	Conserved hypothetical protein.	1.02038	0.838027	0.539869	0.280254	0.230528
Os01g0219500|mRNA|AK109524|CDS+3'UTR	Os01g0219500	Plant lipid transfer protein/Par allergen family protein.	0.128194	0.232964	1.00471	0.997439	1.05404
Os01g0220100|mRNA|AK103304|CDS+3'UTR	Os01g0220100	Similar to Cellulase.	0.131984	0.28175	0.951355	0.612859	0.927453
Os01g0222700|mRNA|AK101946|CDS+3'UTR	Os01g0222700	Protein of unknown function DUF659 domain containing protein.	2.14548	3.14005	3.08305	2.48183	1.06703
Os01g0224200|COMBINER_EST|CI246612|6	Os01g0224200	Hypothetical conserved gene.	26.1219	23.0512	14.0082	1.89792	1.01053
Os01g0224300|COMBINER_EST|CI443645|0	Os01g0224300	CHCH domain containing protein.	6.96192	9.25419	6.39909	2.77125	1.81811
Os01g0226400|mRNA|AK102301|CDS+3'UTR	Os01g0226400	ATPase, AAA-type, core domain containing protein.	2.31728	3.32869	2.66885	3.32524	2.5022
Os01g0228400|mRNA|AK105248|CDS+3'UTR	Os01g0228400	Pentatricopeptide repeat domain containing protein.	1.02258	1.28613	1.017	0.155195	0.108078
Os01g0232000|COMBINER_EST|CI471600|1	Os01g0232000	Major intrinsic protein family protein.	0.548239	0.273012	0.192794	0.165358	0.122069
Os01g0237100|mRNA|AK060943|CDS+3'UTR	Os01g0237100	Phosphoglycerate mutase domain containing protein.	8.36045	7.62226	5.38113	3.53705	3.18143
Os01g0237100|mRNA|AK068739|CDS+3'UTR	Os01g0237100	Phosphoglycerate mutase domain containing protein.	7.59662	6.61269	4.95801	3.16063	2.84715
Os01g0238400|mRNA|AK062747|CDS+3'UTR	Os01g0238375	Conserved hypothetical protein.	0.659399	0.566345	0.502872	0.224146	0.177419
Os01g0238500|mRNA|AK067076|CDS+3'UTR	Os01g0238500	Similar to Branched-chain-amino-acid aminotransferase-like protein 3, chloroplast precursor.	0.508507	0.289094	0.522615	0.332382	0.590452
Os01g0238500|mRNA|AK104302|CDS+3'UTR	Os01g0238500	Similar to Branched-chain-amino-acid aminotransferase-like protein 3, chloroplast precursor.	0.503122	0.282707	0.493683	0.33193	0.578112
Os01g0239100|COMBINER_EST|CI258902|6	Os01g0239100	Heat shock protein DnaJ family protein.	4.60178	3.2042	2.67221	2.11676	1.77687
Os01g0240200|COMBINER_EST|Os01g0240200|8			0.527463	0.377379	0.810516	0.128946	0.15225
Os01g0242400|mRNA|AK108724|CDS+3'UTR	Os01g0242400	Lateral organ boundaries, LOB domain containing protein.	0.0547405	0.0696744	4.12116	4.15454	13.0001
Os01g0243100|mRNA|AK064212|CDS+3'UTR	Os01g0243100	Similar to Kinesin.	3.03906	3.13955	1.45481	0.655871	0.614384
Os01g0243800|mRNA|AK109562|CDS+3'UTR	Os01g0243800	Hypothetical conserved gene.	1.63565	1.14054	1.72813	13.2332	24.7324
Os01g0243900|COMBINER_EST|Os01g0243900|8	Os01g0243900	Hypothetical conserved gene.	1.35678	0.599873	0.312275	0.317587	0.353145
Os01g0244400|COMBINER|CI475611|x	Os01g0244400	Protein of unknown function DUF1618 domain containing protein.	0.848365	0.629697	0.876714	0.274792	0.170327
Os01g0246400|mRNA|AK062972|CDS+3'UTR	Os01g0246400	Similar to Low molecular mass early light-inducible protein HV90, chloroplast precursor (ELIP).	42.8662	14.4569	7.49379	0.440903	0.248281
Os01g0246700|mRNA|AK105509|CDS+3'UTR	Os01g0246700	Similar to WRKY transcription factor 1.	2.43146	3.02757	1.54988	3.1152	2.07017
Os01g0246700|mRNA|AY676928|CDS	Os01g0246700	Similar to WRKY transcription factor 1.	2.06263	1.60489	1.40486	5.95141	12.0613
Os01g0250300|mRNA|AK106665|CDS+3'UTR			0.11749	1.44412	3.62395	3.77396	4.78766
Os01g0251200|mRNA|AK108417|5'UTR+CDS	Os01g0251200	Hypothetical conserved gene.	5.35928	5.53302	3.81299	2.3998	1.49103
Os01g0253900|mRNA|AK072113|CDS+3'UTR	Os01g0253900	Similar to triacylglycerol lipase.	1.32705	1.87015	2.11671	3.0941	3.04249
Os01g0262500|mRNA|AK071545|CDS+3'UTR	Os01g0262500	TRAM, LAG1 and CLN8 homology domain containing protein.	0.559535	0.3334	0.31008	0.244265	0.27304
Os01g0264000|COMBINER_EST|CI410152|0	Os01g0264000	Zinc finger, Dof-type family protein.	1.77549	2.81017	1.87185	0.0586371	0.0432735
Os01g0264100|COMBINER_EST|Os01g0264100|8	Os01g0264100	Similar to UDP-glucose pyrophosphorylase.	1.76689	2.30289	1.07151	0.315356	0.15684
Os01g0265100|mRNA|AK067217|CDS+3'UTR	Os01g0265100	Similar to ADP-ribosylation factor.	0.605578	0.255494	0.18707	0.118689	0.209613
Os01g0267100|mRNA|AK105155|CDS+3'UTR	Os01g0267050	Non-protein coding transcript.	0.82267	0.695253	0.680784	0.281101	0.225669
Os01g0269000|mRNA|AK068875|CDS+3'UTR	Os01g0269000	Similar to Hydroxymethylglutaryl-CoA lyase.	6.71746	11.0561	7.66614	5.95583	3.63319
Os01g0273100|mRNA|AK105320|CDS+3'UTR	Os01g0273100	Similar to Ubiquitin conjugating protein-like (Ubiquitin-conjugating enzyme) (Ubiquitinating enzyme).	1.04604	0.262865	0.289073	0.095439	0.357793
Os01g0276700|mRNA|AK103465|CDS+3'UTR	Os01g0276700	Similar to Pyruvate kinase, cytosolic isozyme (EC 2.7.1.40) (PK).	3.96136	3.09999	1.77775	1.7791	1.07138
Os01g0279000|mRNA|AK119444|CDS+3'UTR	Os01g0279000	Zinc finger, DHHC-type domain containing protein.	1.62912	1.76536	1.23297	0.308813	0.250598
Os01g0279400|mRNA|AF543418|CDS+3'UTR	Os01g0279400	Major facilitator superfamily antiporter.	0.779957	0.231151	0.321466	0.302097	0.340395
Os01g0279400|mRNA|AK065048|CDS+3'UTR	Os01g0279400	Major facilitator superfamily antiporter.	0.784654	0.211227	0.30527	0.274708	0.323387
Os01g0281200|mRNA|AY647458|CDS	Os01g0281200	Similar to Type B-like cyclin (Fragment).	0.604307	0.326469	0.634456	0.266258	0.335325
Os01g0283500|mRNA|AK064158|CDS+3'UTR	Os01g0283500	Peptidase S54, rhomboid domain containing protein.	12.5013	4.85353	2.92318	1.46925	1.30536
Os01g0283500|mRNA|AK107821|CDS+3'UTR	Os01g0283500	Similar to predicted protein.	16.1618	6.48283	2.49423	1.37429	1.85852
Os01g0291500|mRNA|AK060689|CDS+3'UTR	Os01g0291500	Transferase family protein.	0.0637893	0.295272	0.346302	0.667621	0.820559
Os01g0301000|mRNA|AK073246|CDS+3'UTR	Os01g0301000	Pentatricopeptide repeat domain containing protein.	1.64142	2.53544	3.01342	5.02571	3.93264
Os01g0301700|mRNA|AK064223|CDS+3'UTR	Os01g0301700	Hypothetical conserved gene.	3.10819	5.42205	3.35508	5.43954	2.17785
Os01g0302500|mRNA|AB007626|CDS+3'UTR	Os01g0302500	Knotted1-type homeobox protein OSH6.	0.682399	0.280947	0.275493	0.417807	0.346269
Os01g0303000|mRNA|AK058929|CDS+3'UTR	Os01g0303000	Similar to CP12 (Fragment).	0.4584	0.816212	1.50669	10.1125	7.93195
Os01g0303000|mRNA|AK066266|CDS+3'UTR	Os01g0303000	Similar to CP12 (Fragment).	0.505692	0.81645	1.59905	7.66416	6.7142
Os01g0303000|mRNA|AK102013|CDS+3'UTR	Os01g0303000	Similar to CP12 (Fragment).	0.567837	0.848745	1.64113	8.43334	7.42833
Os01g0303600|mRNA|AK099496|CDS+3'UTR	Os01g0303600	Zinc finger, RING/FYVE/PHD-type domain containing protein.	1.62329	3.02165	3.49761	2.06979	1.60465
Os01g0306100|mRNA|AK111041|CDS+3'UTR	Os01g0306100	Plant specific eukaryotic initiation factor 4B family protein.	0.60753	0.194343	0.203936	0.162983	0.210855
Os01g0306400|COMBINER_EST|CI438003|6	Os01g0306400	Hypothetical conserved gene.	1.18991	6.79852	26.0617	1.07089	12.1956
Os01g0307500|mRNA|AK108663|CDS+3'UTR	Os01g0307500	Cation transporter family protein.	0.280922	0.132218	0.232113	0.799996	1.45399
Os01g0310500|mRNA|AK099487|CDS+3'UTR	Os01g0310550	Non-protein coding transcript.	32.5275	11.8695	5.41963	1.35819	0.812365
Os01g0310800|mRNA|AK064374|CDS+3'UTR	Os01g0310800	Similar to Pto kinase interactor 1.	4.03556	3.17542	1.91184	1.63908	1.07547
Os01g0310900|COMBINER_EST|Os01g0310900|8			1.63674	1.14825	1.38248	3.74808	7.13552
Os01g0311700|mRNA|AK072493|CDS+3'UTR	Os01g0311700	Pectinesterase inhibitor domain containing protein.	1.01615	0.813951	0.908685	8.16468	9.90306
Os01g0312500|mRNA|AK105998|CDS+3'UTR	Os01g0312500	Similar to Pectin methylesterase isoform alpha (EC 3.1.1.11) (Fragment).	0.26322	0.162125	0.252067	0.219916	0.396918
Os01g0313300|mRNA|AJ575219|CDS	Os01g0313300	Similar to EREBP-3 protein (Fragment).	5.38088	5.10956	18.6553	4.88669	4.01696
Os01g0313300|mRNA|AK111775|CDS+3'UTR	Os01g0313300	Similar to EREBP-3 protein (Fragment).	4.67891	5.06944	16.0803	7.72066	6.26834
Os01g0316600|mRNA|AK103534|CDS+3'UTR	Os01g0316600	Similar to ASF/SF2-like pre-mRNA splicing factor SRP30'.	7.51901	6.99217	6.2351	7.08406	5.20182
Os01g0322700|mRNA|AK101374|UTR	Os01g0322700	Non-protein coding transcript.	0.0793557	0.0670873	0.455264	1.12066	5.64309
Os01g0322700|mRNA|AK108747|UTR	Os01g0322700	Non-protein coding transcript.	0.0784458	0.0462558	0.291299	0.723346	3.296
Os01g0324500|mRNA|AK111299|CDS+3'UTR	Os01g0324400	Hypothetical conserved gene.	1.16846	2.43073	1.90372	4.45998	7.36277
Os01g0348900|mRNA|AF001395|CDS+3'UTR	Os01g0348900	SalT gene product (Salt-induced protein).	1.92858	0.73841	13.3918	8.30086	22.9637
Os01g0348900|mRNA|AF285163|CDS+3'UTR	Os01g0348900	SalT gene product (Salt-induced protein).	1.85313	0.654886	11.734	10.9354	25.6844
Os01g0348900|mRNA|AF435970|CDS+3'UTR	Os01g0348900	SalT gene product (Salt-induced protein).	1.98085	0.761229	16.2741	11.6996	31.5793
Os01g0348900|mRNA|AK105034|CDS+3'UTR	Os01g0348900	SalT gene product (Salt-induced protein).	2.00883	0.773258	15.3358	12.6524	32.271
Os01g0353400|COMBINER_EST|Os01g0353400|8	Os01g0353400	Similar to Glutathione S-transferase GST 8 (EC 2.5.1.18).	3.76179	2.23209	4.00605	1.14092	1.09917
Os01g0363600|COMBINER_EST|CI060162|6	Os01g0363600	Conserved hypothetical protein.	4.68579	3.07006	2.44589	1.24707	0.877556
Os01g0369700|mRNA|AF309382|CDS+3'UTR	Os01g0369700	Similar to Glutathione S-transferase GST 8 (EC 2.5.1.18).	4.99716	3.46158	5.67496	1.50328	1.31654
Os01g0369700|mRNA|AK063796|CDS+3'UTR	Os01g0369700	Similar to Glutathione S-transferase GST 8 (EC 2.5.1.18).	10.2049	12.702	8.21243	2.17627	1.76887
Os01g0369700|mRNA|AK101436|CDS+3'UTR	Os01g0369700	Similar to Glutathione S-transferase GST 8 (EC 2.5.1.18).	4.56614	2.617	4.73893	1.41373	1.31976
Os01g0369900|mRNA|AK100034|CDS+3'UTR	Os01g0369900	Similar to Oxo-phytodienoic acid reductase.	3.57446	2.48933	3.00885	2.17655	1.78639
Os01g0370200|COMBINER_EST|Os01g0370200|8	Os01g0370200	Similar to Glutathione-S-transferase 19E50.	2.78938	1.13143	1.0476	0.213684	0.156036
Os01g0371200|mRNA|AJ002380|CDS	Os01g0371200	Similar to Glutathione-S-transferase 19E50.	13.5131	20.3316	8.44146	1.70163	0.83973
Os01g0371200|mRNA|AK058900|CDS+3'UTR	Os01g0371200	Similar to Glutathione-S-transferase 19E50.	9.11201	12.1843	6.89884	1.70697	0.986837
Os01g0382000|mRNA|AK107926|CDS+3'UTR	Os01g0382000	Similar to Pathogenesis-related protein PRB1-2 precursor.	2.2195	3.57652	4.57389	2.78282	3.87918
Os01g0390600|mRNA|AK119355|CDS+3'UTR	Os01g0390600	Pentatricopeptide repeat domain containing protein.	4.36032	4.11976	1.91943	1.46325	1.78572
Os01g0390800|COMBINER|CI118684|6			5.26356	5.2489	2.23311	1.83848	1.88723
Os01g0391100|mRNA|AK063499|CDS+3'UTR	Os01g0391100	Hypothetical gene.	24.27	8.59655	5.25242	2.83852	1.77511
Os01g0391100|mRNA|AK108533|CDS+3'UTR	Os01g0391100	Similar to ATP-binding cassette, sub-family F, member 2 (Iron inhibited ABC transporter 2) (HUSSY-18).	7.76632	6.20294	3.98555	3.06761	2.7228
Os01g0393000|mRNA|AK066701|CDS+3'UTR	Os01g0393000	Hypothetical conserved gene.	1.1031	1.34385	1.63067	3.57164	4.15201
Os01g0393000|mRNA|AK072836|CDS+3'UTR	Os01g0393000	Conserved hypothetical protein.	1.19814	1.53379	1.69774	3.5694	3.80784
Os01g0503400|mRNA|AK122122|CDS+3'UTR	Os01g0503400	Similar to (Rice Genome Annotation Project) metal transporter Nramp6.	2.71549	5.59971	3.64703	4.51491	3.91227
Os01g0510200|mRNA|AK062310|CDS+3'UTR	Os01g0510200	Conserved hypothetical protein.	2.22137	18.1685	14.6308	32.1457	22.7236
Os01g0511100|mRNA|AK070914|CDS+3'UTR	Os01g0511100	UspA domain containing protein.	2.72312	6.79506	7.9184	2.61278	1.93155
Os01g0516400|COMBINER_EST|Os01g0516400|8	Os01g0516400	Similar to Stress-responsive protein.	0.672954	0.328879	0.294369	0.534872	0.539388
Os01g0523000|mRNA|AK105213|CDS+3'UTR	Os01g0523000	Hypothetical gene.	1.15568	1.18268	2.29652	14.3436	20.3258
Os01g0523200|COMBINER|CI082861|6	Os01g0523200	CALS5 (CALLOSE SYNTHASE 5).	1.01882	0.457227	0.353759	0.185613	0.177232
Os01g0524700|mRNA|AK105413|CDS+3'UTR	Os01g0524700	Armadillo-like helical domain containing protein.	40.4748	35.0758	28.4324	4.6089	1.57154
Os01g0528800|mRNA|AK068824|CDS+3'UTR	Os01g0528800	Similar to Cinnamyl alcohol dehydrogenase.	0.950555	1.18719	1.67119	3.92338	3.08384
Os01g0530400|mRNA|AK106476|CDS+3'UTR	Os01g0530400	Thioredoxin fold domain containing protein.	4.82993	6.88901	6.22635	4.60249	2.79815
Os01g0530400|mRNA|AK120148|CDS+3'UTR	Os01g0530400	Similar to cDNA clone:002-104-C07, full insert sequence.	3.36642	4.94877	3.13735	1.88206	1.34716
Os01g0536400|COMBINER_EST|CI557769|0	Os01g0536400	Isopenicillin N synthase family protein.	7.42223	5.53596	2.82324	1.03383	0.958794
Os01g0538200|COMBINER_EST|Os01g0538200|8			3.18555	3.46795	2.35755	2.31334	2.0982
Os01g0542700|mRNA|AK110526|CDS+3'UTR	Os01g0542700	bZIP transcription factor, bZIP-1 domain containing protein.	8.2714	2.93895	0.87762	0.27852	0.253154
Os01g0542900|mRNA|AK071596|CDS+3'UTR	Os01g0543000	Hypothetical gene.	1.62556	1.17899	1.34076	3.33401	6.0462
Os01g0543100|mRNA|AK105363|CDS+3'UTR	Os01g0543100	Similar to Peroxidase 72 precursor (EC 1.11.1.7) (Atperox P72) (PRXR8) (ATP6a).	0.903787	0.873385	0.575091	0.29091	0.290706
Os01g0546400|mRNA|AK058673|CDS+3'UTR	Os01g0546400	Protein of unknown function DUF6, transmembrane domain containing protein.	0.822582	0.488329	0.420307	0.261731	0.174537
Os01g0549200|mRNA|AK060747|CDS+3'UTR	Os01g0549200	Hypothetical conserved gene.	0.985018	0.670892	0.826418	0.315745	0.258013
Os01g0556400|COMBINER_EST|CI130408|6	Os01g0556400	Heat shock protein DnaJ family protein.	3.15362	3.58853	2.81028	2.55623	1.64854
Os01g0559000|mRNA|AK061456|CDS+3'UTR	Os01g0559000	Protein of unknown function DUF1000 family protein.	2.20651	3.24905	3.71603	2.73933	2.31936
Os01g0559000|mRNA|AK070797|CDS+3'UTR	Os01g0559000	Similar to Thioredoxin family Trp26.	2.30391	3.40548	3.68979	2.72063	2.2137
Os01g0564000|COMBINER|CI276946|6			1.48809	3.06522	3.04318	7.60682	7.54861
Os01g0565900|mRNA|AK061615|UTR	Os01g0565900	Non-protein coding transcript.	5.8912	5.68916	3.12344	2.16583	1.34466
Os01g0565900|mRNA|AK065822|CDS+3'UTR	Os01g0565900	Similar to Protein transport protein Sec61 beta subunit.	6.55589	5.59356	3.10273	2.21813	1.44176
Os01g0567400|COMBINER_EST|CI331470|6	Os01g0567400	Hypothetical conserved gene.	1.32085	3.27321	4.11455	2.82316	2.9981
Os01g0571800|COMBINER|CI095526|6	Os01g0571800	Lateral organ boundaries, LOB domain containing protein.	0.674572	1.2806	8.36544	5.37445	13.3967
Os01g0580100|mRNA|AK069131|CDS+3'UTR	Os01g0580100	Similar to Dolichyl-phosphate-mannose--glycolipid alpha-mannosyltransferase-like protein.	0.388515	0.435349	0.300348	0.313018	0.213905
Os01g0580300|mRNA|AK063468|CDS+3'UTR	Os01g0580300	Conserved hypothetical protein.	1.59024	2.24119	2.36651	4.25824	3.95459
Os01g0585100|mRNA|AK069774|CDS+3'UTR	Os01g0585100	Conserved hypothetical protein.	5.2107	5.66914	3.19645	1.12489	0.934671
Os01g0585300|mRNA|AK071353|CDS+3'UTR	Os01g0585300	Protein of unknown function DUF1118 family protein.	1.18843	1.44469	1.40518	0.292246	0.13099
Os01g0585300|mRNA|AK099180|CDS+3'UTR	Os01g0585300	Protein of unknown function DUF1118 family protein.	1.16242	1.29459	1.36204	0.272291	0.115572
Os01g0589000|mRNA|AK099851|CDS+3'UTR	Os01g0589000	Nucleic acid-binding, OB-fold domain containing protein.	1.04424	1.53368	1.62901	6.53191	4.54073
Os01g0590300|mRNA|AK063740|CDS+3'UTR	Os01g0590300	Conserved hypothetical protein.	5.53988	5.62697	3.88075	2.65003	1.81058
Os01g0593300|COMBINER_EST|AU172809|6			1.07361	2.11478	2.84369	4.25713	5.879
Os01g0594300|mRNA|AK105670|CDS+3'UTR	Os01g0594300	Similar to leucine-rich repeat family protein / extensin family protein.	4.17492	3.2866	1.49208	0.673446	0.930924
Os01g0594500|mRNA|AK069454|CDS+3'UTR	Os01g0594500	Conserved hypothetical protein.	0.169167	0.194578	0.621235	3.06732	3.0665
Os01g0594900|mRNA|AK070921|CDS+3'UTR	Os01g0594900	Conserved hypothetical protein.	0.260288	0.00621624	0.0299752	2.7605	12.0256
Os01g0596000|COMBINER_EST|Os01g0596000|8			0.921974	0.6615	0.732589	0.305776	0.288528
Os01g0600500|COMBINER_EST|CI448144|0	Os01g0600500	HAD-superfamily subfamily IB hydrolase, hypothetical 1 protein.	0.451536	0.514495	0.319694	0.159308	0.254636
Os01g0603200|mRNA|AK063738|CDS+3'UTR	Os01g0603200	Conserved hypothetical protein.	3.20453	3.03537	3.05645	2.99562	3.20594
Os01g0603300|mRNA|AK061500|CDS+3'UTR	Os01g0603300	Similar to MCB2 protein.	3.44534	3.43067	2.82596	1.05946	0.956723
Os01g0603300|mRNA|AK103432|CDS+3'UTR	Os01g0603300	Similar to MCB2 protein.	4.16631	4.12063	3.00137	0.868283	0.925145
Os01g0604500|mRNA|AK064844|CDS+3'UTR	Os01g0604500	EF-Hand type domain containing protein.	0.612908	0.564387	0.178927	0.37491	0.26946
Os01g0605500|COMBINER_EST|Os01g0605500|8	Os01g0605500	Kinesin, motor region domain containing protein.	1.14434	0.185983	0.236041	0.0761529	0.209465
Os01g0606900|mRNA|AK065697|CDS+3'UTR	Os01g0606900	Heat shock protein DnaJ, N-terminal domain containing protein.	26.4309	11.373	19.0861	40.4295	24.8552
Os01g0607000|mRNA|AK105136|CDS+3'UTR	Os01g0607000	Glutelin family protein.	0.675645	3.60977	3.47964	1.69164	5.48938
Os01g0607900|COMBINER_EST|CI194762|6	Os01g0607900	Serine/threonine protein kinase-related domain containing protein.	0.551429	0.334246	0.302441	0.310342	0.395
Os01g0608300|COMBINER_EST|Os01g0608300|8	Os01g0608300	Similar to aspartic proteinase nepenthesin-2.	0.402559	0.195951	0.234973	0.382564	0.424479
Os01g0611100|mRNA|AB015288|CDS+3'UTR	Os01g0611100	Similar to GTP-binding nuclear protein Ran-2.	12.7171	11.7199	4.11314	2.58799	1.5905
Os01g0611100|mRNA|AB015971|CDS+3'UTR	Os01g0611100	Similar to GTP-binding nuclear protein Ran-2.	3.84338	3.61029	1.92219	1.59346	1.16918
Os01g0611100|mRNA|AK072731|CDS+3'UTR	Os01g0611100	Similar to GTP-binding nuclear protein Ran-2.	3.95137	3.67209	2.05669	1.58262	1.1391
Os01g0620100|mRNA|AK070122|CDS+3'UTR	Os01g0620100	WD40 repeat-like domain containing protein.	1.41778	1.69803	1.85579	4.12172	3.2411
Os01g0621600|mRNA|AK100122|CDS+3'UTR	Os01g0621600	Serine/threonine protein kinase-related domain containing protein.	0.301327	0.350145	0.514067	0.340377	0.324499
Os01g0624700|mRNA|AK111416|CDS+3'UTR	Os01g0624700	Similar to WRKY transcription factor 12.	8.93281	3.56622	1.97186	0.775358	1.0054
Os01g0624700|mRNA|AY676924|CDS	Os01g0624700	Similar to WRKY transcription factor 12.	6.40649	3.69879	2.25384	1.38935	1.43942
Os01g0628700|COMBINER_EST|CI002312|0	Os01g0628700	Cytochrome P450.	1.7573	3.1609	2.97205	3.61011	3.20606
Os01g0631700|mRNA|AK065494|CDS+3'UTR	Os01g0631700	Similar to Ser Thr specific protein kinase-like protein.	1.28875	0.724282	0.507753	0.199786	0.204435
Os01g0631800|mRNA|AK069421|CDS+3'UTR	Os01g0631800	Conserved hypothetical protein.	5.84695	8.01274	1.62719	1.32493	1.12084
Os01g0636500|mRNA|AK073853|CDS+3'UTR	Os01g0636500	Similar to Polygalacturonase PG2.	0.547641	0.695281	0.611167	0.152209	0.17885
Os01g0636500|mRNA|AK104990|CDS+3'UTR	Os01g0636500	Similar to Polygalacturonase PG2.	0.508344	0.658493	0.579148	0.135375	0.154821
Os01g0637100|COMBINER_EST|Os01g0637100|8	Os01g0637100	Similar to predicted protein.	8.57346	3.28252	1.67658	0.996007	0.738505
Os01g0637500|COMBINER|CI147859|6	Os01g0637500	Similar to polygalacturonase.	0.503501	0.602022	0.548646	0.128132	0.148756
Os01g0637800|COMBINER_EST|CI105260|6	Os01g0637800	Similar to MYB8 protein.	0.972681	3.49132	3.28122	1.76952	2.24935
Os01g0644000|mRNA|AK122159|CDS+3'UTR	Os01g0644000	Twin-arginine translocation pathway signal domain containing protein.	1.5745	3.08371	3.53472	2.72458	2.35679
Os01g0644500|COMBINER|CI556134|x	Os01g0644500	Hypothetical conserved gene.	0.997477	1.57995	2.91418	3.07072	3.85904
Os01g0645000|mRNA|AK108658|CDS+3'UTR	Os01g0645000	Similar to TIS11 protein (dTIS11).	0.206552	0.232574	0.880798	0.937116	1.54331
Os01g0645200|mRNA|AK069337|CDS+3'UTR	Os01g0645200	Bile acid:sodium symporter domain containing protein.	0.93354	0.619393	0.50291	0.264382	0.212305
Os01g0645200|mRNA|AK104932|CDS+3'UTR	Os01g0645200	Bile acid:sodium symporter domain containing protein.	0.96622	0.673774	0.539663	0.274351	0.221852
Os01g0646500|COMBINER_EST|Os01g0646500|8			1.57929	1.17233	1.33269	7.58013	14.2315
Os01g0650000|mRNA|AK062640|CDS+3'UTR	Os01g0650000	Lipase, GDSL domain containing protein.	8.4592	5.65781	3.279	2.02065	1.74693
Os01g0654400|COMBINER_EST|CI046497|0	Os01g0654400	Conserved hypothetical protein.	1.85624	4.73976	10.2981	15.1186	13.5515
Os01g0660100|mRNA|AK108487|CDS+3'UTR	Os01g0660100	Conserved hypothetical protein.	1.53054	1.14001	1.69295	7.57876	14.2581
Os01g0660900|COMBINER_EST|CI150279|6	Os01g0660900	Similar to phosphoglycerate mutase family protein.	1.25058	1.53171	2.591	5.83158	4.91308
Os01g0661500|mRNA|AK068127|CDS+3'UTR	Os01g0661500	Mov34/MPN/PAD-1 family protein.	0.854907	1.86668	2.96457	3.72308	3.62853
Os01g0665900|COMBINER|CI262788|6	Os01g0665900	Conserved hypothetical protein.	14.0407	10.2773	9.10833	4.12181	5.03781
Os01g0666200|mRNA|AK064663|CDS+3'UTR	Os01g0666200	High mobility group, HMG1/HMG2 domain containing protein.	1.32185	1.8405	1.95815	3.71069	3.29384
Os01g0668500|mRNA|AK108767|CDS+3'UTR	Os01g0668500	Conserved hypothetical protein.	0.892008	4.23132	4.16473	5.15193	3.697
Os01g0669300|COMBINER|CI232580|6			0.535053	0.20605	0.263364	0.26519	0.317047
Os01g0670500|mRNA|AK109750|CDS+3'UTR	Os01g0670500	Conserved hypothetical protein.	0.875287	1.3704	1.48756	3.18031	3.51749
Os01g0670800|mRNA|AB071291|CDS+3'UTR	Os01g0670800	Similar to Auxin response factor 2.	0.594305	0.47886	0.322322	0.216023	0.13126
Os01g0673300|COMBINER_EST|Os01g0673300|8	Os01g0673300	Protein of unknown function DUF295 family protein.	5.62529	2.97932	3.12423	1.92559	1.59359
Os01g0674400|COMBINER|CI439169|2	Os01g0674400	Hypothetical conserved gene.	1.15618	4.16305	5.88391	6.29407	6.89293
Os01g0674400|COMBINER|CI439169|x	Os01g0674400	Hypothetical conserved gene.	1.7657	4.46646	5.40238	6.68792	7.54661
Os01g0676200|mRNA|AK070436|CDS+3'UTR	Os01g0676200	Conserved hypothetical protein.	0.931399	1.67937	3.05644	5.42608	4.53573
Os01g0676200|mRNA|AK104204|CDS+3'UTR	Os01g0676200	Conserved hypothetical protein.	0.899524	1.70857	3.2395	6.20658	4.93812
Os01g0680200|mRNA|AK121881|CDS+3'UTR	Os01g0680200	Protein of unknown function DUF250 domain containing protein.	0.412228	0.504285	4.52886	3.05338	2.21378
Os01g0680400|mRNA|AK067914|CDS+3'UTR	Os01g0680400	Histone-fold domain containing protein.	1.63682	2.38582	2.58975	3.81914	3.29677
Os01g0681900|mRNA|AK105755|5'UTR+CDS	Os01g0682001	Similar to NADH dependent Glutamate Synthase.	0.817926	0.360169	0.462399	0.281241	0.310467
Os01g0684400|COMBINER|CI521995|6	Os01g0684400	Conserved hypothetical protein.	0.763301	0.512447	0.334582	0.282848	0.29242
Os01g0685900|mRNA|AK064024|CDS+3'UTR	Os01g0685900	Similar to 65kD microtubule associated protein.	0.921769	0.264488	0.255842	0.189967	0.237714
Os01g0685900|mRNA|AK102005|CDS+3'UTR	Os01g0685900	Similar to 65kD microtubule associated protein.	0.833684	0.225363	0.217597	0.189489	0.232002
Os01g0686600|mRNA|AK119910|CDS+3'UTR	Os01g0686600	RNA-processing protein, HAT helix domain containing protein.	2.15616	1.4313	7.23718	10.7091	6.91806
Os01g0687300|mRNA|AK064954|CDS+3'UTR	Os01g0687300	Conserved hypothetical protein.	0.605354	0.651395	0.622847	4.07329	8.74767
Os01g0687300|mRNA|AK122113|CDS+3'UTR	Os01g0687300	Conserved hypothetical protein.	0.586791	0.59626	0.581514	4.10083	8.47075
Os01g0694600|COMBINER_EST|CI546906|0			4.17181	3.56868	1.52668	1.17522	1.26043
Os01g0695300|mRNA|AK099451|CDS+3'UTR	Os01g0695300	Similar to Farnesyl pyrophosphate synthetase (FPP synthetase) (FPS) (Farnesyl diphosphate synthetase) [Includes: Dimethylallyltranstransferase (EC 2.5.1.1); Geranyltranstransferase (EC 2.5.1.10)].	2.56685	4.85534	3.88751	2.69625	2.15538
Os01g0695900|mRNA|AK108259|CDS+3'UTR	Os01g0695900	OSMYB4.	6.8649	2.54993	5.93415	2.06954	2.30988
Os01g0699100|mRNA|AK058518|5'UTR+CDS	Os01g0699100	Serine/threonine protein kinase domain containing protein.	4.66415	3.87625	2.47467	0.742587	1.04173
Os01g0699400|mRNA|AK107168|5'UTR+CDS	Os01g0699400	Serine/threonine protein kinase domain containing protein.	5.94939	4.95957	4.50723	2.33557	3.07842
Os01g0702000|mRNA|AK065414|CDS+3'UTR	Os01g0702000	Protein of unknown function DUF151 domain containing protein.	0.89975	1.35106	1.9549	8.5841	7.40089
Os01g0702500|mRNA|AK063691|CDS+3'UTR	Os01g0702500	Similar to Dehydrin Rab25.	13.9064	17.0283	15.939	5.77396	8.48168
Os01g0702500|mRNA|AY333185|CDS+3'UTR	Os01g0702500	Similar to Dehydrin Rab25.	15.3458	20.5347	18.0901	9.22795	11.5651
Os01g0702500|mRNA|X57327|CDS+3'UTR	Os01g0702500	Similar to Dehydrin Rab25.	14.0292	19.0341	17.0408	6.02709	9.38119
Os01g0703300|mRNA|AK069643|CDS+3'UTR	Os01g0703300	Zinc finger, RING/FYVE/PHD-type domain containing protein.	0.468854	0.277533	3.15631	2.41291	3.09545
Os01g0703300|mRNA|AK099917|CDS+3'UTR	Os01g0703300	Zinc finger, RING/FYVE/PHD-type domain containing protein.	0.680891	0.800717	5.14831	3.30428	3.06763
Os01g0705200|mRNA|AK064074|CDS+3'UTR	Os01g0705200	Late embryogenesis abundant protein repeat containing protein.	2.77942	3.66601	6.28639	0.913394	1.2324
Os01g0705200|mRNA|AK073837|CDS+3'UTR	Os01g0705200	Late embryogenesis abundant protein repeat containing protein.	2.95968	3.80362	6.8219	0.888712	1.2848
Os01g0705200|mRNA|D26536|CDS+3'UTR	Os01g0705200	Late embryogenesis abundant protein repeat containing protein.	2.77707	3.57598	6.33405	0.849454	1.24502
Os01g0710200|COMBINER_EST|CI225649|6	Os01g0710200	Amine oxidase domain containing protein.	0.442839	0.483207	0.377354	0.189132	0.262354
Os01g0710300|COMBINER_EST|CI470274|6	Os01g0710300	Conserved hypothetical protein.	20.1444	12.1772	4.09031	2.65846	1.97857
Os01g0715500|COMBINER_EST|Os01g0715500|8	Os01g0715500	Similar to voltage-dependent anion channel protein 2.	0.997102	0.661108	0.574963	0.197141	0.147802
Os01g0716400|mRNA|AK066768|CDS+3'UTR	Os01g0716400	Violaxanthin de-epoxidase family protein.	12.083	7.13271	5.30145	4.33144	2.22978
Os01g0716500|mRNA|AK101454|CDS+3'UTR	Os01g0716500	Methyltransferase type 12 domain containing protein.	1.33344	3.01446	3.32535	2.16061	1.8171
Os01g0718000|mRNA|AK111476|CDS+3'UTR	Os01g0718000	Zinc finger, AN1-type domain containing protein.	3.1756	3.0782	3.4409	3.79679	4.26313
Os01g0719100|mRNA|AK060327|UTR	Os01g0719100	Hypothetical gene.	17.2057	17.4944	11.7567	6.84707	5.53722
Os01g0719100|mRNA|AK062155|CDS+3'UTR	Os01g0719100	Similar to PGPD14 protein.	10.7904	14.8968	13.1529	9.71256	7.7948
Os01g0719100|mRNA|AK068005|CDS+3'UTR	Os01g0719100	Similar to PGPD14 protein.	9.90864	14.7144	11.4859	10.7574	8.44523
Os01g0719100|mRNA|AK070809|5'UTR+CDS	Os01g0719100	Similar to RING finger and CHY zinc finger domain-containing protein 1.	13.8974	20.6594	15.6934	9.39555	7.33126
Os01g0719100|mRNA|AY574990|CDS+3'UTR	Os01g0719100	Similar to RING finger and CHY zinc finger domain-containing protein 1.	10.857	14.9923	12.8145	9.26942	7.71682
Os01g0719400|mRNA|AK063516|CDS+3'UTR	Os01g0719400	CASC3/Barentsz eIF4AIII binding domain containing protein.	16.5506	6.65271	3.26706	1.1525	1.24922
Os01g0719600|mRNA|AK070988|CDS+3'UTR	Os01g0719600	Heavy metal transport/detoxification protein domain containing protein.	0.854341	0.839685	0.564347	0.287325	0.274466
Os01g0720700|COMBINER_EST|CI462042|0	Os01g0720700	Similar to satase isoform I.	1.87639	4.10992	8.16163	3.90827	3.82004
Os01g0721400|mRNA|AK063472|CDS+3'UTR	Os01g0721400	NB-ARC domain containing protein.	9.06297	12.5009	4.66909	3.05173	2.022
Os01g0722800|COMBINER_EST|Os01g0722800|8	Os01g0722800	Dimethylmenaquinone methyltransferase family protein.	1.10949	2.26203	2.68317	3.33891	3.12565
Os01g0727800|mRNA|AK108195|CDS+3'UTR	Os01g0727800	Peptidase S8, subtilisin-related domain containing protein.	0.449357	0.267737	0.302974	0.189338	0.461603
Os01g0730500|mRNA|AK100064|CDS+3'UTR	Os01g0730500	Similar to Ferredoxin (Bacterial type ferredoxin family).	6.98972	3.78852	2.39589	1.66121	0.575867
Os01g0730600|COMBINER|CI208697|6	Os01g0730600	Hypothetical conserved gene.	2.12933	0.842482	0.367388	0.199442	0.296574
Os01g0731100|mRNA|AK106037|CDS+3'UTR	Os01g0731100	Similar to Pathogen-related protein.	0.301938	0.313844	0.424547	0.466854	0.854875
Os01g0732700|COMBINER_EST|CI413550|0	Os01g0732700	YUCCA-like gene 3.;Flavin monooxygenase-like enzyme.;Auxin biosynthesis.	1.53079	2.6044	3.02454	4.36522	2.98388
Os01g0733200|mRNA|AK066316|CDS+3'UTR	Os01g0733200	Similar to Heat shock transcription factor 29 (Fragment).	0.455827	0.510382	0.854366	20.9651	28.0475
Os01g0733200|mRNA|AY344493|CDS+3'UTR	Os01g0733200	Similar to Heat shock transcription factor 29 (Fragment).	0.444712	0.49771	0.8599	19.9954	27.7358
Os01g0743200|mRNA|AK109798|CDS+3'UTR	Os01g0743200	Similar to Pectinesterase.	0.877438	0.414895	0.436185	0.242547	0.246716
Os01g0750400|COMBINER_EST|CI276976|6	Os01g0750400	Hypothetical conserved gene.	0.658857	0.522194	0.385159	0.287071	0.295001
Os01g0751400|COMBINER_EST|Os01g0751400|8	Os01g0751400	Conserved hypothetical protein.	1.31545	1.05843	1.69222	8.85229	12.8404
Os01g0754300|mRNA|AK108081|CDS+3'UTR	Os01g0754300	Conserved hypothetical protein.	37.1371	21.2476	10.6485	8.85952	2.45367
Os01g0754800|mRNA|AK108976|CDS+3'UTR	Os01g0754800	Conserved hypothetical protein.	0.43476	0.437419	0.273055	0.235165	0.154114
Os01g0755600|COMBINER|CI434063|x	Os01g0755600	Conserved hypothetical protein.	0.809008	1.35017	2.13773	3.28466	4.49781
Os01g0756900|mRNA|AK058427|CDS+3'UTR	Os01g0756900	Aldehyde dehydrogenase, conserved site domain containing protein.	0.978706	0.207749	0.251485	0.0938914	0.295972
Os01g0757400|mRNA|AB110177|CDS+3'UTR	Os01g0757400	Similar to Katanin p60 ATPase-containing subunit A1 (EC 3.6.4.3) (Katanin p60 subunit A1) (p60 katanin). Splice isoform 2.	0.88571	0.408289	0.31143	0.26184	0.282476
Os01g0757400|mRNA|AK058626|CDS+3'UTR	Os01g0757400	Similar to Katanin p60 ATPase-containing subunit A1 (EC 3.6.4.3) (Katanin p60 subunit A1) (p60 katanin). Splice isoform 2.	0.857344	0.384636	0.294844	0.249459	0.283273
Os01g0757400|mRNA|AK102585|CDS+3'UTR	Os01g0757400	Similar to Katanin p60 ATPase-containing subunit A1 (EC 3.6.4.3) (Katanin p60 subunit A1) (p60 katanin). Splice isoform 2.	0.852493	0.374365	0.286967	0.25183	0.274665
Os01g0757500|mRNA|AK058268|CDS+3'UTR	Os01g0757500	Similar to Calcyclin-binding protein.	8.10937	6.97126	5.26378	2.72233	1.74564
Os01g0757500|mRNA|AK121744|CDS+3'UTR	Os01g0757500	CS domain domain containing protein.	9.03489	7.60553	5.41416	3.32662	1.96371
Os01g0758300|mRNA|AB055074|5'UTR+CDS	Os01g0758300	Similar to Phosphoenolpyruvate carboxylase, housekeeping isozyme (EC 4.1.1.31) (PEPCase).	1.08425	0.377128	0.427945	0.288567	0.277513
Os01g0758300|mRNA|AK070480|CDS+3'UTR	Os01g0758300	Similar to Phosphoenolpyruvate carboxylase, housekeeping isozyme.	0.948456	0.397496	0.404442	0.313904	0.298708
Os01g0758300|mRNA|AK101274|CDS+3'UTR	Os01g0758300	Similar to Phosphoenolpyruvate carboxylase, housekeeping isozyme (EC 4.1.1.31) (PEPCase).	0.914882	0.4186	0.398767	0.299289	0.303982
Os01g0762600|COMBINER_EST|Os01g0762600|8			3.47209	3.14021	1.82457	2.07544	1.16172
Os01g0767600|mRNA|AK070672|CDS+3'UTR	Os01g0767600	Conserved hypothetical protein.	5.93789	5.07596	3.54256	1.63483	1.19554
Os01g0769000|mRNA|AK100439|CDS+3'UTR	Os01g0769000	Conserved hypothetical protein.	0.798317	0.613497	0.418696	0.315144	0.254386
Os01g0770700|COMBINER_EST|Os01g0770700|8	Os01g0770700	Similar to Copper transporter 1.	0.205697	0.152489	0.27943	0.214684	0.48288
Os01g0771200|mRNA|AK106172|CDS+3'UTR	Os01g0771200	Similar to Mal d 1-associated protein.	5.58498	5.99513	3.83607	2.34864	1.61916
Os01g0772100|COMBINER_EST|CI463833|6	Os01g0772100	Hypothetical conserved gene.	0.249795	0.168058	7.55086	5.1141	6.47665
Os01g0773200|mRNA|AK069524|CDS+3'UTR	Os01g0773200	Hypothetical conserved gene.	6.55143	5.12326	1.51864	1.26714	0.449414
Os01g0775100|mRNA|AK101217|CDS+3'UTR	Os01g0775100	Plus-3 domain containing protein.	1.01998	1.18614	0.906415	0.144609	0.126257
Os01g0778900|mRNA|AK107825|CDS+3'UTR	Os01g0778900	Conserved hypothetical protein.	6.08298	4.58642	19.8254	1.62728	1.71945
Os01g0780400|mRNA|AK108379|CDS+3'UTR	Os01g0780400	Hypothetical gene.	4.45693	6.35249	1.61576	0.814595	0.903539
Os01g0780800|mRNA|AK108614|CDS+3'UTR	Os01g0780800	Similar to predicted protein.	3.10409	2.88588	6.7113	1.71175	1.79539
Os01g0781000|mRNA|AK059870|CDS+3'UTR	Os01g0781000	Vacuolar protein sorting-associated, VPS28 family protein.	0.968411	1.17451	1.68464	3.18589	3.67698
Os01g0781000|mRNA|AK099116|CDS+3'UTR	Os01g0781000	Vacuolar protein sorting-associated, VPS28 family protein.	0.94331	1.23743	1.63282	3.37378	3.76032
Os01g0781000|mRNA|AK104274|CDS+3'UTR	Os01g0781000	Vacuolar protein sorting-associated, VPS28 family protein.	0.949933	1.22054	1.54071	3.19671	3.55538
Os01g0783700|mRNA|AK109278|CDS+3'UTR	Os01g0783700	Similar to EF-hand Ca2+-binding protein CCD1.	12.7208	11.5408	2.42391	2.42275	5.38936
Os01g0795400|mRNA|AK100351|CDS+3'UTR	Os01g0795400	Similar to Subtilase.	0.172761	0.25202	1.41245	0.56247	1.01467
Os01g0795600|mRNA|AK111059|CDS+3'UTR	Os01g0795600	Conserved hypothetical protein.	8.99609	22.2298	8.52997	3.29695	6.18199
Os01g0796800|COMBINER_EST|Os01g0796800|8			1.06772	1.01859	1.52468	3.26567	4.03309
Os01g0802600|COMBINER_EST|CI176233|6	Os01g0802600	Similar to Circadian clock coupling factor ZGT.	3.79263	3.87676	3.62315	6.68157	8.44798
Os01g0802700|mRNA|AK059229|CDS+3'UTR	Os01g0802700	Auxin efflux carrier domain containing protein.	3.73651	2.96727	2.51725	0.71655	0.299074
Os01g0803200|mRNA|U54702|CDS+3'UTR	Os01g0803200	Similar to Cysteine protease inhibitor.	0.439067	0.382007	1.05792	0.179199	0.091211
Os01g0803300|mRNA|AK071286|CDS+3'UTR	Os01g0803300	Protein of unknown function DUF6, transmembrane domain containing protein.	0.55633	0.298523	0.48789	0.2202	0.168318
Os01g0805200|mRNA|AK066239|CDS+3'UTR	Os01g0805200	Conserved hypothetical protein.	0.524221	0.743183	1.56358	3.53978	3.40787
Os01g0805200|mRNA|AK104864|CDS+3'UTR	Os01g0805200	Conserved hypothetical protein.	0.490662	0.744022	1.4678	3.11915	3.05383
Os01g0805400|mRNA|AK105954|CDS+3'UTR	Os01g0805400	UDP-glucuronosyl/UDP-glucosyltransferase family protein.	0.727359	1.16565	1.92128	3.07532	3.32719
Os01g0805600|mRNA|AK111939|CDS+3'UTR	Os01g0805600	Similar to Cyclin IaZm (Fragment).	0.849322	0.169635	0.293509	0.107467	0.255799
Os01g0810200|mRNA|AK069286|CDS+3'UTR	Os01g0810200	Cupin, RmlC-type domain containing protein.	0.814556	1.67205	2.15479	4.03894	3.4458
Os01g0810300|mRNA|AF231026|CDS+3'UTR	Os01g0810300	Similar to Calmodulin-like protein.	4.36871	7.59841	8.82159	9.3266	9.63044
Os01g0810300|mRNA|AK070889|CDS+3'UTR	Os01g0810300	Similar to Calmodulin-like protein.	3.34003	4.90723	5.52347	5.15816	5.27375
Os01g0810300|mRNA|U37936|CDS+3'UTR	Os01g0810300	Similar to Calmodulin-like protein.	3.42563	4.91001	5.99865	5.59952	5.57011
Os01g0814100|mRNA|AK061173|CDS+3'UTR	Os01g0814100	Similar to Bindin (Fragment).	0.52295	0.268758	0.195282	0.192435	0.248681
Os01g0816100|mRNA|AB028183|CDS+3'UTR	Os01g0816100	Similar to NAC domain protein.	0.959248	3.24875	4.47061	3.26361	4.1529
Os01g0816100|mRNA|AK073848|CDS+3'UTR	Os01g0816100	Similar to NAC domain protein.	0.93462	3.07126	4.14895	3.49691	4.23356
Os01g0819100|COMBINER_EST|CI429121|6	Os01g0819100	Similar to predicted protein.	0.517149	0.43884	0.297861	0.285451	0.335756
Os01g0821600|mRNA|AK108657|CDS+3'UTR	Os01g0821600	WRKY transcription factor 48-like protein (WRKY transcription factor 21).	1.01179	0.698932	0.287651	0.159084	0.322767
Os01g0822800|mRNA|AK065060|CDS+3'UTR	Os01g0822800	Similar to RING-H2 finger protein ATL3C.	1.72445	1.07447	1.75351	15.3369	17.6733
Os01g0823100|mRNA|AK070463|CDS+3'UTR	Os01g0823100	Alpha-expansin OsEXPA2.	0.235329	0.309631	0.414408	0.384985	0.724681
Os01g0823100|mRNA|U30477|CDS+3'UTR	Os01g0823100	Alpha-expansin OsEXPA2.	0.231268	0.3111	0.418438	0.391135	0.67756
Os01g0826400|mRNA|AK107199|CDS+3'UTR	Os01g0826400	WRKY transcription factor 24 (WRKY24).	5.30775	16.9067	3.14338	4.58594	1.78069
Os01g0826400|mRNA|AY341849|CDS+3'UTR	Os01g0826400	WRKY transcription factor 24 (WRKY24).	5.57706	18.9639	3.42101	4.90173	1.83556
Os01g0826400|mRNA|AY676925|CDS	Os01g0826400	WRKY transcription factor 24 (WRKY24).	5.74516	13.8399	3.1555	2.96887	1.72704
Os01g0827300|mRNA|AK071929|CDS+3'UTR	Os01g0827300	Similar to Laccase precursor (EC 1.10.3.2).	25.7602	66.0331	6.7865	4.26468	5.73947
Os01g0832100|mRNA|AK064727|CDS+3'UTR	Os01g0832100	Esterase, SGNH hydrolase-type domain containing protein.	0.37506	0.334179	0.324438	0.261855	0.314201
Os01g0833500|mRNA|AK073320|CDS+3'UTR	Os01g0833500	Similar to Serine carboxypeptidase II-1 precursor (EC 3.4.16.6) (CP-MII.1) (Fragment).	0.624747	0.758835	0.405822	0.326477	0.266203
Os01g0837000|COMBINER_EST|CI563146|0	Os01g0837000	Ankyrin repeat containing protein.	4.50933	3.43408	2.01815	2.73095	2.44199
Os01g0837200|mRNA|AK062368|CDS+3'UTR	Os01g0837200	Conserved hypothetical protein.	0.179254	0.395326	0.858578	1.96996	3.1222
Os01g0837900|mRNA|AK106580|UTR	Os01g0837900	Non-protein coding transcript.	1.36648	5.19511	6.10924	6.34127	4.54849
Os01g0840100|COMBINER_EST|CI273581|6	Os01g0840100	Heat shock protein Hsp70 family protein.	3.23599	3.18135	2.85288	2.03694	1.79314
Os01g0841700|mRNA|U95135|CDS+3'UTR	Os01g0841700	Similar to Isoform ERG1b of Elicitor-responsive protein 1.	6.54145	6.12843	5.29833	2.60608	4.13616
Os01g0841700|mRNA|U95136|CDS+3'UTR	Os01g0841700	Similar to Isoform ERG1b of Elicitor-responsive protein 1.	6.57846	6.25695	5.50554	2.98645	4.7294
Os01g0842400|mRNA|AF047697|CDS+3'UTR	Os01g0842400	Similar to Laccase (EC 1.10.3.2).	0.288893	0.136007	0.243613	0.386035	0.35733
Os01g0842400|mRNA|AK059101|CDS+3'UTR	Os01g0842400	Similar to cDNA clone:J013170B10, full insert sequence.	0.288307	0.111074	0.223511	0.402194	0.378052
Os01g0842400|mRNA|AK068901|CDS+3'UTR	Os01g0842400	Similar to Laccase (EC 1.10.3.2).	0.273082	0.0914737	0.222545	0.382949	0.354409
Os01g0842500|mRNA|AK066513|CDS+3'UTR	Os01g0842500	Similar to Laccase (EC 1.10.3.2).	0.328299	0.312966	0.579247	0.595524	1.24423
Os01g0845800|COMBINER|AU075609|6			2.45928	3.1801	2.94238	4.02258	3.24336
Os01g0846800|mRNA|AK063080|CDS+3'UTR	Os01g0846800	Regulator of chromosome condensation, RCC1 domain containing protein.	6.148	2.66075	2.02085	0.106251	0.0587236
Os01g0848200|mRNA|AK101230|CDS+3'UTR	Os01g0848200	Similar to Delta 1-pyrroline-5-carboxylate synthetase (P5CS) [Includes: Glutamate 5-kinase (EC 2.7.2.11) (Gamma-glutamyl kinase) (GK); Gamma-glutamyl phosphate reductase (GPR) (EC 1.2.1.41) (Glutamate-5-semialdehyde dehydrogenase) (Glutamyl-gamma-semialdehyde dehydrogenase)].	0.784475	0.228815	0.270268	1.11371	1.0626
Os01g0848900|mRNA|AK065438|CDS+3'UTR	Os01g0848900	Conserved hypothetical protein.	3.76796	3.59441	3.1152	2.46615	3.68434
Os01g0849000|mRNA|AK105208|CDS+3'UTR	Os01g0849000	Bifunctional inhibitor/plant lipid transfer protein/seed storage domain containing protein.	2.88231	3.025	5.01321	2.39091	3.36927
Os01g0850400|mRNA|AJ575220|5'UTR+CDS	Os01g0850400	Similar to MYBY1 protein (Fragment).	5.6002	3.84581	2.84774	2.1225	1.42562
Os01g0850400|mRNA|AK108582|CDS+3'UTR	Os01g0850400	Similar to MYBY1 protein (Fragment).	6.76755	4.06303	2.5992	2.815	1.69774
Os01g0850900|mRNA|AK063822|CDS+3'UTR	Os01g0850900	SOUL haem-binding protein domain containing protein.	1.11595	1.61364	1.16097	0.270068	0.188917
Os01g0850900|mRNA|AK102887|CDS+3'UTR	Os01g0850900	SOUL haem-binding protein domain containing protein.	1.13304	1.78862	1.23318	0.286793	0.20725
Os01g0854000|mRNA|AK070440|CDS+3'UTR	Os01g0854000	Conserved hypothetical protein.	0.725372	1.22946	0.916315	0.330288	0.324649
Os01g0854800|mRNA|AK109676|CDS+3'UTR	Os01g0854800	Similar to Cytochrome P450 86A1 (EC 1.14.-.-) (CYPLXXXVI) (P450-dependent fatty acid omega-hydroxylase).	0.178767	0.191515	1.71027	2.73829	2.72979
Os01g0855200|mRNA|AK066597|CDS+3'UTR	Os01g0855200	Tetratricopeptide-like helical domain containing protein.	2.82212	3.6735	3.51719	4.59275	3.6103
Os01g0856500|mRNA|AK103981|CDS+3'UTR	Os01g0856500	Similar to auxin transporter-like protein 1.	0.476661	0.469984	0.408115	0.274986	0.329684
Os01g0856800|mRNA|AK072489|CDS+3'UTR	Os01g0856800	Similar to pleckstrin homology domain-containing protein 1.	0.498509	0.363934	0.306329	0.264452	0.275657
Os01g0858200|mRNA|AK108646|CDS+3'UTR	Os01g0858200	Similar to DEAH (Asp-Glu-Ala-His) box polypeptide 16.	1.09272	1.36869	2.04641	3.62357	3.64705
Os01g0860500|mRNA|AK069860|CDS+3'UTR	Os01g0860601	Similar to Ferredoxin, root R-B1.	40.4025	77.4933	29.4406	10.7543	6.12539
Os01g0860500|mRNA|AK099172|CDS+3'UTR	Os01g0860500	Similar to Hevamine A precursor [Includes: Chitinase (EC 3.2.1.14); Lysozyme (EC 3.2.1.17)].	0.559594	4.15451	1.85016	4.05531	1.48633
Os01g0863300|mRNA|AK111571|CDS+3'UTR	Os01g0863300	Similar to MCB2 protein.	9.08172	5.24357	4.50705	1.65284	2.52715
Os01g0865800|COMBINER_EST|C23635|6	Os01g0865800	Similar to AOBP (Ascorbate oxidase promoter-binding protein).	0.232545	0.215561	0.356735	0.264258	0.313431
Os01g0867300|mRNA|AK067919|CDS+3'UTR	Os01g0867300	Similar to OSE2-like protein (Fragment).	3.61778	4.51777	4.51059	2.43672	2.88165
Os01g0867300|mRNA|U25283|CDS+3'UTR	Os01g0867300	Similar to OSE2-like protein (Fragment).	3.29315	4.59436	4.42189	2.5084	2.79583
Os01g0867400|mRNA|AK063889|UTR	Os01g0867400	Non-protein coding transcript.	5.40996	5.3958	5.88352	3.23957	3.67113
Os01g0867600|mRNA|AK102226|CDS+3'UTR	Os01g0867600	Similar to UDP-glucose:sterol glucosyltransferase (EC 2.4.1.173).	3.36544	3.59578	2.18857	1.59074	1.25966
Os01g0868000|COMBINER_EST|CI210992|6	Os01g0868000	Hypothetical conserved gene.	4.41385	9.2291	10.5677	1.82788	1.84996
Os01g0869000|mRNA|AK067351|CDS+3'UTR	Os01g0869000	Hypothetical conserved gene.	3.09074	3.388	2.58431	1.74952	1.42232
Os01g0869000|mRNA|AK068777|CDS+3'UTR	Os01g0869000	Similar to predicted protein.	2.67674	3.88978	3.33226	2.42415	2.09627
Os01g0869000|mRNA|AK121602|CDS+3'UTR	Os01g0869000	Protein of unknown function DUF639 family protein.	2.76886	3.75217	3.244	2.24577	2.02453
Os01g0869200|mRNA|AK073453|CDS+3'UTR	Os01g0869200	Mg2+ transporter protein, CorA-like domain containing protein.	1.20336	1.53084	2.01953	4.07591	4.22469
Os01g0869300|mRNA|AK059347|CDS+3'UTR	Os01g0869300	Conserved hypothetical protein.	1.68124	0.667002	0.40902	0.27901	0.193362
Os01g0869800|mRNA|AK058284|CDS+3'UTR	Os01g0869800	Similar to Photosystem II subunit PsbS.	0.513778	0.15301	0.189717	0.18982	0.25015
Os01g0869800|mRNA|AK071827|CDS+3'UTR	Os01g0869800	Similar to Photosystem II subunit PsbS.	0.522229	0.149305	0.180784	0.188838	0.241139
Os01g0869800|mRNA|AK104275|CDS+3'UTR	Os01g0869800	Similar to Photosystem II subunit PsbS.	0.515845	0.146669	0.179091	0.187123	0.231947
Os01g0872500|mRNA|AK066692|CDS+3'UTR	Os01g0872500	Similar to peptide transporter PTR2-B.	0.71589	1.12931	1.48453	3.68872	3.11247
Os01g0873800|mRNA|AK068140|CDS+3'UTR	Os01g0873800	Conserved hypothetical protein.	6.29705	4.48466	2.6127	1.66114	1.29791
Os01g0874800|mRNA|AK119315|CDS+3'UTR	Os01g0874800	Similar to DNA polymerase I.	0.554994	2.75814	4.1667	7.69983	3.60828
Os01g0876400|mRNA|AK072910|CDS+3'UTR	Os01g0876400	Hypothetical conserved gene.	3.43424	1.41397	0.578047	0.310653	0.236217
Os01g0876400|mRNA|AK073144|CDS+3'UTR	Os01g0876400	Hypothetical conserved gene.	4.73707	3.52218	1.8136	1.22465	1.14853
Os01g0876400|mRNA|AK100486|CDS+3'UTR	Os01g0876400	Hypothetical conserved gene.	4.68111	1.79474	0.785165	0.401916	0.291975
Os01g0876400|mRNA|AK121648|CDS+3'UTR	Os01g0876400	Hypothetical conserved gene.	4.5492	3.9463	1.84998	1.22473	1.15622
Os01g0878700|mRNA|AK065286|CDS+3'UTR	Os01g0878700	Amino acid transporter, transmembrane domain containing protein.	0.658757	1.79019	1.62684	0.185895	0.255969
Os01g0878700|mRNA|AK119529|CDS+3'UTR	Os01g0878700	Amino acid transporter, transmembrane domain containing protein.	1.09414	1.8623	1.70143	0.317748	0.28261
Os01g0878900|mRNA|AK060927|CDS+3'UTR	Os01g0878900	Similar to 4,5-DOPA dioxygenase extradiol-like protein.	0.273355	0.257271	0.555454	0.741663	0.746665
Os01g0878900|mRNA|AK104432|CDS+3'UTR	Os01g0878900	Similar to 4,5-DOPA dioxygenase extradiol-like protein.	0.239384	0.251131	0.534512	0.632368	0.658874
Os01g0878900|mRNA|AK104462|CDS+3'UTR	Os01g0878900	Similar to 4,5-DOPA dioxygenase extradiol-like protein.	0.218934	0.246944	0.451528	0.552155	0.640546
Os01g0878900|mRNA|AK104545|CDS+3'UTR	Os01g0878900	Similar to 4,5-DOPA dioxygenase extradiol-like protein.	0.32451	0.239439	0.549974	0.658657	0.762672
Os01g0878900|mRNA|AK104652|CDS+3'UTR	Os01g0878900	Similar to 4,5-DOPA dioxygenase extradiol-like protein.	0.164232	0.26991	0.459698	0.648894	0.607004
Os01g0880800|mRNA|AK059526|CDS+3'UTR	Os01g0880800	Similar to Acyl-[acyl-carrier-protein] desaturase, chloroplast precursor (EC 1.14.19.2) (Stearoyl-ACP desaturase).	13.542	11.5054	22.1459	1.9778	0.628558
Os01g0880800|mRNA|AK101524|CDS+3'UTR	Os01g0880800	Similar to Acyl-[acyl-carrier-protein] desaturase, chloroplast precursor (EC 1.14.19.2) (Stearoyl-ACP desaturase).	15.3408	11.6185	24.4431	2.03767	0.54917
Os01g0880800|mRNA|AK120809|CDS+3'UTR	Os01g0880800	Similar to Acyl-[acyl-carrier-protein] desaturase, chloroplast precursor (EC 1.14.19.2) (Stearoyl-ACP desaturase).	18.9583	12.4327	27.9551	2.36939	0.640582
Os01g0881900|mRNA|AK102849|CDS+3'UTR	Os01g0881900	Leucine-rich repeat, cysteine-containing containing protein.	2.38198	4.26929	3.46433	2.66617	1.90856
Os01g0882100|COMBINER_EST|CI472252|6	Os01g0882100	Hypothetical conserved gene.	0.611711	0.656802	0.44271	0.226045	0.227487
Os01g0882800|mRNA|AK059325|CDS+3'UTR	Os01g0882800	Similar to Amino acid carrier (Fragment).	2.23601	1.11296	0.3534	0.223002	0.249196
Os01g0884300|mRNA|AB028185|CDS+3'UTR	Os01g0884300	No apical meristem(NAM) protein domain containing protein.	1.47136	2.91249	4.85047	2.21087	4.20605
Os01g0884300|mRNA|AK068392|CDS+3'UTR	Os01g0884300	No apical meristem(NAM) protein domain containing protein.	1.31866	2.63117	4.27826	2.4496	4.5691
Os01g0886200|mRNA|AY551913|CDS+3'UTR	Os01g0886200	Similar to AGAMOUS homolog.	0.519092	0.268636	0.344328	0.223898	0.28075
Os01g0886300|mRNA|AK120493|UTR	Os01g0886300	Hypothetical gene.	1.06811	0.857831	0.451896	0.26891	0.20229
Os01g0888600|mRNA|AK072733|CDS+3'UTR	Os01g0888600	Similar to barley mlo defense gene homolog8.	2.73186	4.77211	3.53014	1.35603	1.11665
Os01g0888600|mRNA|AK121374|CDS+3'UTR	Os01g0888600	Similar to Seven transmembrane protein Mlo5 (Fragment).	2.54144	5.43159	3.25184	1.31677	1.14653
Os01g0888900|mRNA|AK120651|CDS+3'UTR	Os01g0888900	Conserved hypothetical protein.	2.02976	2.95703	12.1269	4.99011	4.76922
Os01g0892600|mRNA|AK104609|CDS+3'UTR	Os01g0892600	Pectinacetylesterase family protein.	1.00002	0.475886	0.51209	0.203874	0.234257
Os01g0893400|mRNA|AK061917|CDS+3'UTR	Os01g0893400	Zinc finger, TAZ-type domain containing protein.	11.3357	10.3351	3.33083	3.63706	1.39135
Os01g0893400|mRNA|AK071112|CDS+3'UTR	Os01g0893400	Zinc finger, TAZ-type domain containing protein.	21.6371	17.4867	5.71977	5.05553	3.84951
Os01g0895500|mRNA|AK063649|CDS+3'UTR	Os01g0895500	Peptidase S54, rhomboid domain containing protein.	12.4627	5.34856	2.51027	1.25374	0.993938
Os01g0895600|mRNA|AK099626|CDS+3'UTR	Os01g0895600	Similar to Calreticulin 3 (Fragment).	2.03994	4.2442	3.48816	3.09781	2.28563
Os01g0896400|mRNA|AK107067|CDS+3'UTR	Os01g0896400	Conserved hypothetical protein.	1.0221	0.175119	0.200035	0.0566837	0.228671
Os01g0898900|mRNA|AK120093|CDS+3'UTR	Os01g0898900	Nucleotide-sugar transporter family protein.	11.5351	9.68811	4.59875	2.29917	1.62657
Os01g0900200|mRNA|AK071608|CDS+3'UTR	Os01g0900200	Conserved hypothetical protein.	4.84092	6.35903	3.29741	1.84301	1.49871
Os01g0902200|mRNA|AK064932|CDS+3'UTR	Os01g0902200	Peptidase M3A and M3B, thimet/oligopeptidase F domain containing protein.	3.85201	3.89901	2.57398	1.69892	1.24723
Os01g0902200|mRNA|AK064934|CDS+3'UTR	Os01g0902200	Peptidase M3A and M3B, thimet/oligopeptidase F domain containing protein.	3.51683	3.31389	1.8201	0.947267	0.689464
Os01g0905300|mRNA|AK070609|CDS+3'UTR	Os01g0905300	Exo70 exocyst complex subunit family protein.	26.7373	11.7767	2.0319	1.07069	1.62138
Os01g0908600|COMBINER_EST|CI394003|0	Os01g0908600	Amino acid transporter, transmembrane domain containing protein.	0.205359	0.211188	0.460139	0.647036	1.38652
Os01g0909500|mRNA|AK119276|CDS+3'UTR	Os01g0909500	Similar to cDNA clone:J013116D08, full insert sequence.	1.02212	1.55512	2.01501	4.3492	3.49725
Os01g0910900|COMBINER_EST|CI030932|0	Os01g0910900	Conserved hypothetical protein.	2.54204	7.88547	9.84942	16.0111	17.7551
Os01g0914300|mRNA|AK103489|CDS+3'UTR	Os01g0914300	Plant lipid transfer protein/seed storage/trypsin-alpha amylase inhibitor domain containing protein.	0.738791	0.329688	0.424122	0.312787	0.32236
Os01g0914700|mRNA|AK069261|CDS+3'UTR	Os01g0914700	Peptidase A22B, signal peptide peptidase domain containing protein.	0.263647	0.182234	0.218557	0.366081	0.429085
Os01g0915400|COMBINER_EST|Os01g0915400|8	Os01g0915400	Similar to SEC (SECRET AGENT); transferase, transferring glycosyl groups.	0.972955	1.55519	3.18443	3.23025	3.02101
Os01g0923000|mRNA|AK070795|CDS+3'UTR	Os01g0923000	Conserved hypothetical protein.	1.69294	2.48445	1.32052	0.163085	0.17095
Os01g0931200|mRNA|AK063586|CDS+3'UTR	Os01g0931200	Armadillo-type fold domain containing protein.	0.827457	0.116332	0.183613	0.0893179	0.248312
Os01g0931300|mRNA|AK068196|CDS+3'UTR	Os01g0931300	Tafazzin family protein.	3.85206	3.4446	2.40431	2.72003	2.07581
Os01g0931300|mRNA|AK099213|CDS+3'UTR	Os01g0931300	Tafazzin domain containing protein.	4.63247	3.56003	2.55961	2.55886	2.17289
Os01g0934800|mRNA|Z34270|CDS+3'UTR	Os01g0934800	Alpha/beta hydrolase fold-1 domain containing protein.	0.714047	4.94815	8.81468	7.57868	7.05104
Os01g0935600|mRNA|AK061490|CDS+3'UTR	Os01g0935600	Immunoglobulin/major histocompatibility complex, conserved site domain containing protein.	2.48584	3.75921	3.5351	3.06411	2.34961
Os01g0935600|mRNA|AK105604|CDS+3'UTR	Os01g0935600	Similar to predicted protein.	2.35518	3.01561	3.28051	2.70529	2.26904
Os01g0935600|mRNA|AK106484|CDS+3'UTR	Os01g0935600	Immunoglobulin/major histocompatibility complex, conserved site domain containing protein.	3.69023	5.19638	4.55234	4.87928	3.11182
Os01g0939100|mRNA|AK070064|CDS+3'UTR	Os01g0939100	Similar to Calmodulin-stimulated calcium-ATPase.	0.77617	0.327627	0.316717	0.440315	0.90904
Os01g0944100|mRNA|AK103482|CDS+3'UTR	Os01g0944100	Conserved hypothetical protein.	0.318807	0.424867	24.8837	0.200047	1.58372
Os01g0944100|mRNA|AK103580|CDS+3'UTR	Os01g0944100	Conserved hypothetical protein.	1.42713	6.27211	41.6497	5.69619	9.12884
Os01g0944700|mRNA|AF443600|CDS+3'UTR	Os01g0944700	Similar to Beta-1,3-glucanase precursor.	2.35063	0.410168	6.4653	7.22685	11.5427
Os01g0944700|mRNA|AK070056|CDS+3'UTR	Os01g0944700	Similar to Beta-1,3-glucanase precursor.	0.761165	0.564359	6.39887	7.96635	11.9381
Os01g0946100|mRNA|AK072248|CDS+3'UTR	Os01g0946100	WD40 repeat-like domain containing protein.	1.2444	0.30317	0.285596	0.146673	0.325592
Os01g0946100|mRNA|AK099261|CDS+3'UTR	Os01g0946100	WD40 repeat-like domain containing protein.	1.20513	0.295942	0.293104	0.129184	0.314775
Os01g0952900|mRNA|AK069958|CDS+3'UTR	Os01g0952900	Conserved hypothetical protein.	4.43529	8.99369	1.96393	0.573951	0.698903
Os01g0952900|mRNA|AK104991|CDS+3'UTR	Os01g0952900	Conserved hypothetical protein.	4.53288	8.92541	1.93545	0.612388	0.703376
Os01g0955100|mRNA|AK062671|CDS+3'UTR	Os01g0955100	Similar to Avr9/Cf-9 rapidly elicited protein 57 (Fragment).	3.79376	3.68113	1.26833	0.917728	1.07698
Os01g0960900|COMBINER_EST|CI183211|6	Os01g0960900	Hypothetical conserved gene.	0.505837	0.231878	0.351493	0.298104	0.263207
Os01g0961000|mRNA|AK062919|CDS+3'UTR	Os01g0961000	Conserved hypothetical protein.	0.381693	0.312435	0.263876	1.04469	1.51196
Os01g0961200|mRNA|AK105424|CDS+3'UTR	Os01g0961200	Cystathionine beta-synthase, core domain containing protein.	0.508204	0.427396	0.386415	0.287932	0.278742
Os01g0963000|mRNA|AK061131|CDS+3'UTR	Os01g0963000	Similar to Peroxidase BP 1 precursor.	0.221445	0.34276	0.35567	0.198875	0.0927847
Os01g0963000|mRNA|AK104277|CDS+3'UTR	Os01g0963000	Similar to Peroxidase BP 1 precursor.	0.225404	0.31704	0.352473	0.178938	0.0770872
Os01g0963200|COMBINER_EST|CI461123|6	Os01g0963200	Peroxidase BP 1 precursor.	0.260939	0.182817	0.277247	0.315661	0.531288
Os01g0964000|mRNA|AK073599|CDS+3'UTR	Os01g0964000	Similar to VAMP-like protein YKT61 (AtYKT61) (Geranylgeranylated protein 1) (AtGP1).	7.93496	14.6701	7.59218	4.84577	2.96307
Os01g0964000|mRNA|AK104012|CDS+3'UTR	Os01g0964000	Similar to VAMP-like protein YKT61 (AtYKT61) (Geranylgeranylated protein 1) (AtGP1).	4.18268	6.35707	4.19263	2.1851	1.61723
Os01g0964000|mRNA|AK104190|CDS+3'UTR	Os01g0964000	Similar to VAMP-like protein YKT61 (AtYKT61) (Geranylgeranylated protein 1) (AtGP1).	4.13594	6.55739	4.57871	2.10266	1.65785
Os01g0965400|mRNA|AK069647|CDS+3'UTR	Os01g0965400	Similar to Uridylate kinase (EC 2.7.4.-) (UK) (Uridine monophosphate kinase) (UMP kinase).	1.34383	1.8446	2.41853	3.68005	3.08471
Os01g0965400|mRNA|AK104789|CDS+3'UTR	Os01g0965400	Similar to Uridylate kinase (EC 2.7.4.-) (UK) (Uridine monophosphate kinase) (UMP kinase).	1.33617	1.84401	2.42654	3.56775	3.02032
Os01g0968800|mRNA|AY345234|CDS+3'UTR	Os01g0968800	Similar to Dehydration responsive element binding protein 1F (DREB1F protein).	3.08766	5.16641	3.89592	1.0866	1.5779
Os01g0971400|mRNA|AK059528|CDS+3'UTR	Os01g0971400	Similar to Cysteine proteinase.	0.286906	0.271677	0.631826	0.962465	1.36481
Os01g0971400|mRNA|AK106011|CDS+3'UTR	Os01g0971400	Similar to Cysteine proteinase.	0.274462	0.257708	0.610668	0.952508	1.36485
Os01g0971400|mRNA|AK119182|CDS+3'UTR	Os01g0971400	Similar to Cysteine proteinase.	0.286521	0.26869	0.621873	0.941588	1.37381
Os01g0971600|mRNA|AK070366|CDS+3'UTR	Os01g0971600	Similar to Sn-glycerol-3-phosphate dehydrogenase (Fragment).	0.622534	0.307808	0.277533	0.451264	0.729255
Os01g0971800|mRNA|AY581256|CDS+3'UTR	Os01g0971800	Similar to Two-component response regulator ARR11 (Receiver-like protein 3).	3.58281	2.83414	2.31977	3.33809	17.1922
Os01g0972900|mRNA|AK109536|CDS+3'UTR	Os01g0972900	Similar to Clone ZZD405 mRNA sequence. (Fragment).	1.11389	0.355	0.534379	0.251201	0.315447
Os01g0973200|COMBINER_EST|CI276041|6	Os01g0973200	Hypothetical conserved gene.	0.972663	0.373834	0.248274	0.233081	0.237635
Os01g0975000|mRNA|AK103552|CDS+3'UTR	Os01g0975000	Protein of unknown function DUF966 family protein.	7.20598	9.3858	1.70839	1.1383	0.840361
Os01g0975000|mRNA|AK119662|CDS+3'UTR	Os01g0975000	Protein of unknown function DUF966 family protein.	7.86098	10.0273	1.7607	1.35558	0.948235
Os01g0975900|mRNA|AB114829|CDS+3'UTR	Os01g0975900	Similar to Tonoplast membrane integral protein ZmTIP1-2.	2.50766	21.9805	12.0585	3.87884	5.878
Os01g0975900|mRNA|AK111747|CDS+3'UTR	Os01g0975900	Similar to Tonoplast membrane integral protein ZmTIP1-2.	4.72754	57.1338	29.1114	4.7476	6.15317
Os01g0978000|mRNA|AK102326|CDS+3'UTR	Os01g0978000	Similar to Uncoupling protein.	0.578093	0.406559	0.260197	0.274029	0.317522
Os01g0978000|mRNA|AK103874|CDS+3'UTR	Os01g0978000	Similar to Uncoupling protein.	0.544528	0.372081	0.260904	0.262119	0.285037
Os02g0100700|mRNA|AK070106|CDS+3'UTR	Os02g0100700	Similar to predicted protein.	3.46181	6.05258	5.15569	5.10421	2.91943
Os02g0102900|mRNA|AK070603|CDS+3'UTR	Os02g0102900	Similar to RuBisCO subunit binding-protein beta subunit, chloroplast (60 kDa chaperonin beta subunit) (CPN-60 beta) (Fragment).	3.95742	3.65195	1.60215	1.21671	0.976453
Os02g0105400|mRNA|AK103257|CDS+3'UTR	Os02g0105400	Similar to L-lactate dehydrogenase A (EC 1.1.1.27) (LDH-A).	0.605696	0.55257	0.331384	0.213291	0.228888
Os02g0105400|mRNA|AK105416|CDS+3'UTR	Os02g0105400	Similar to L-lactate dehydrogenase.	0.601627	0.613457	0.372546	0.226574	0.255593
Os02g0105400|mRNA|D13817|CDS+3'UTR	Os02g0105400	Similar to L-lactate dehydrogenase.	0.623197	0.648154	0.355596	0.23584	0.264745
Os02g0110000|mRNA|AK106946|CDS+3'UTR	Os02g0110000	Lipase, GDSL domain containing protein.	0.0876923	0.0877325	2.43545	7.31171	10.884
Os02g0111800|mRNA|AK110271|CDS+3'UTR	Os02g0111800	Protein kinase, core domain containing protein.	0.353042	0.221968	0.274683	0.355665	0.284682
Os02g0114400|COMBINER_EST|CI138049|6	Os02g0114400	Phospholipid/glycerol acyltransferase domain containing protein.	5.06919	6.3643	3.67916	0.878883	0.966108
Os02g0114800|COMBINER_EST|Os02g0114800|8	Os02g0114800	Similar to MYB1.	1.18991	0.896462	1.36697	21.6146	28.8363
Os02g0115700|mRNA|AK061923|CDS+3'UTR	Os02g0115700	Similar to Catalase.	0.241484	0.280337	0.752412	0.80289	1.58717
Os02g0115700|mRNA|AK065094|CDS+3'UTR	Os02g0115700	Catalase isozyme A (EC 1.11.1.6) (CAT-A).	0.229567	0.264555	0.665243	0.737171	1.49565
Os02g0115700|mRNA|AK071061|CDS+3'UTR	Os02g0115700	Similar to Catalase.	0.251891	0.280071	0.647039	0.82754	1.61122
Os02g0115700|mRNA|AK099231|CDS+3'UTR	Os02g0115700	Catalase isozyme A (EC 1.11.1.6) (CAT-A).	0.235857	0.26314	0.651416	0.756255	1.48964
Os02g0115700|mRNA|AK099923|CDS+3'UTR	Os02g0115700	Catalase isozyme A (EC 1.11.1.6) (CAT-A).	0.245937	0.266808	0.681172	0.741342	1.51622
Os02g0115700|mRNA|X61626|CDS+3'UTR	Os02g0115700	Similar to Catalase.	0.232837	0.267364	0.6895	0.761897	1.5752
Os02g0116700|mRNA|AK109928|CDS+3'UTR	Os02g0116700	Protein kinase, core domain containing protein.	1.14803	1.09349	0.995218	0.276912	0.212954
Os02g0117200|COMBINER_EST|CI387537|0	Os02g0117200	Conserved hypothetical protein.	3.81048	3.89208	2.27002	2.0649	1.65041
Os02g0117600|mRNA|AK112015|CDS+3'UTR	Os02g0117600	Peptidyl-prolyl cis-trans isomerase, FKBP-type domain containing protein.	6.14243	3.78048	2.49713	1.51643	1.58111
Os02g0124600|COMBINER_EST|C99380|6	Os02g0124600	D-arabinono-1,4-lactone oxidase domain containing protein.	0.446759	0.221247	0.590647	0.301084	0.636005
Os02g0125200|COMBINER_EST|CI261093|6	Os02g0125200	Similar to DNA-binding protein.	3.05212	4.93105	4.11473	3.12557	3.32178
Os02g0125700|mRNA|AK101502|CDS+3'UTR	Os02g0125700	Similar to Lil3 protein.	0.922715	0.894376	0.819015	0.27034	0.253836
Os02g0131000|mRNA|AK062905|CDS+3'UTR	Os02g0131000	Conserved hypothetical protein.	0.407728	0.368593	0.266105	0.293833	0.384591
Os02g0132300|mRNA|AK106973|CDS+3'UTR	Os02g0132300	Similar to Erythrocyte membrane protein PFEMP3 (Fragment).	2.17766	3.6518	3.56446	3.82883	3.09046
Os02g0134300|mRNA|AK120292|CDS+3'UTR	Os02g0134300	Protein of unknown function DUF701, zinc-binding putative family protein.	3.76953	17.6844	11.5146	14.7579	9.483
Os02g0138000|COMBINER_EST|CI140066|6	Os02g0138000	Leucine-rich repeat, plant specific containing protein.	0.696509	0.372164	0.303328	0.156011	0.244494
Os02g0139100|mRNA|AK065722|CDS+3'UTR	Os02g0139100	Activator of Hsp90 ATPase, N-terminal domain containing protein.	8.00884	7.09116	4.83943	2.82912	1.78419
Os02g0140800|COMBINER_EST|CI226187|6	Os02g0140800	Hypothetical conserved gene.	29.3768	8.27014	6.03766	2.03107	4.03509
Os02g0147100|COMBINER_EST|CI250750|6	Os02g0147100	Conserved hypothetical protein.	1.28908	1.63316	2.18288	3.84812	3.60846
Os02g0154700|COMBINER_EST|Os02g0154700|8			3.0035	12.757	3.51443	1.31666	0.718049
Os02g0155400|mRNA|AK107566|CDS+3'UTR	Os02g0155400	Leucine-rich repeat, N-terminal domain containing protein.	3.04345	14.2656	3.4815	1.26455	0.499808
Os02g0158100|mRNA|AK058991|CDS+3'UTR	Os02g0158100	Similar to EH-domain-containing protein 1.	1.50983	0.481845	0.304379	0.202458	0.244553
Os02g0158100|mRNA|AK073124|CDS+3'UTR	Os02g0158100	EF hand domain containing protein.	1.44313	0.444838	0.289299	0.185477	0.228605
Os02g0158500|COMBINER_EST|CI556020|1	Os02g0158500	Uncharacterized plant-specific domain 01627 containing protein.	0.233122	0.279976	0.713259	0.919166	1.56167
Os02g0158900|mRNA|AK108324|CDS+3'UTR	Os02g0158900	Similar to SNF4.	11.0924	8.26862	3.88537	1.52871	1.51693
Os02g0166300|COMBINER|CI095768|6			1.22121	1.3924	1.02032	3.08341	3.59616
Os02g0173200|mRNA|AK068418|CDS+3'UTR	Os02g0173200	VQ domain containing protein.	9.27799	4.4435	2.81501	3.1971	2.97087
Os02g0175400|mRNA|AK067063|CDS+3'UTR	Os02g0175400	Similar to Vacuolar H(+)-ATPase subunit A (Fragment).	0.985111	0.613189	0.357793	0.282412	0.279218
Os02g0177300|COMBINER_EST|CI147320|6	Os02g0177300	Squamosa-promoter binding protein 1.	0.321274	0.328473	0.257679	0.525165	0.401814
Os02g0177700|mRNA|AK119941|CDS+3'UTR	Os02g0177700	Uncharacterised protein family UPF0497, trans-membrane plant subgroup domain containing protein.	0.499353	0.749027	0.822211	0.270482	0.235151
Os02g0177900|mRNA|AK066421|CDS+3'UTR	Os02g0177900	Carbohydrate kinase, FGGY family protein.	2.10645	4.07054	5.84669	4.81556	4.12191
Os02g0179400|COMBINER|CI181233|6	Os02g0179400	Similar to Tubby-like protein 4.	0.760494	0.396327	0.283706	0.309694	0.335314
Os02g0179600|mRNA|AK110418|CDS+3'UTR	Os02g0179600	Uncharacterized conserved protein UCP015417, vWA domain containing protein.	0.858794	2.40518	1.54314	3.75923	3.07699
Os02g0181900|COMBINER_EST|AU172375|7	Os02g0181900	Similar to ClpB.	20.5352	15.7462	6.81837	2.78888	1.49892
Os02g0183500|COMBINER_EST|Os02g0183500|8	Os02g0183500	Hypothetical conserved gene.	0.490142	0.108179	0.471308	0.188122	0.154819
Os02g0184700|COMBINER_EST|CI223126|6	Os02g0184700	Cytochrome P450 family protein.	0.48096	0.288219	0.46693	0.291562	0.257604
Os02g0191600|COMBINER_EST|Os02g0191600|8	Os02g0191600	bZIP transcription factor, bZIP-1 domain containing protein.	0.189616	0.201606	0.237343	0.182974	0.250377
Os02g0193000|COMBINER_EST|CI426747|5	Os02g0193000	Protein kinase-like domain containing protein.	3.94831	7.08595	2.0022	1.60842	1.95839
Os02g0193600|mRNA|AK060499|CDS+3'UTR	Os02g0193600	Mitotic checkpoint serine/threonine protein kinase, Bub1 domain containing protein.	1.21529	0.161147	0.273051	0.0848634	0.262042
Os02g0194300|mRNA|AK072385|CDS+3'UTR	Os02g0194300	Nse4 domain containing protein.	1.36424	1.56217	2.02072	4.07341	3.03362
Os02g0198500|mRNA|AK062474|CDS+3'UTR	Os02g0198500	Conserved hypothetical protein.	0.31377	0.940498	1.95754	2.23498	3.85188
Os02g0198500|mRNA|AK063694|CDS+3'UTR	Os02g0198500	Hypothetical conserved gene.	1.24879	1.03573	1.67835	7.13629	10.4099
Os02g0201000|mRNA|AK106682|CDS+3'UTR	Os02g0201000	Conserved hypothetical protein.	125.294	125.71	24.5385	6.30825	3.28385
Os02g0202700|COMBINER_EST|Os02g0202700|8	Os02g0202700	Serine acetyltransferase.	18.0386	25.6263	13.0566	4.95558	5.82085
Os02g0203000|COMBINER_EST|AU096937|7	Os02g0203000	Similar to transcription factor HY5.	0.826967	1.40426	1.23654	0.307815	0.310285
Os02g0204500|mRNA|AK120670|CDS+3'UTR	Os02g0204500	Hypothetical conserved gene.	0.663708	4.54674	4.58214	4.60411	2.7172
Os02g0206700|COMBINER_EST|CI507529|0	Os02g0206700	UDP-glucuronosyl/UDP-glucosyltransferase family protein.	0.894627	1.1424	3.51231	3.21717	3.14427
Os02g0207300|mRNA|AK064602|UTR	Os02g0207300	Non-protein coding transcript.	6.87876	3.82532	1.62341	0.906586	0.790535
Os02g0209300|mRNA|AK063719|UTR	Os02g0209300	Hypothetical conserved gene.	4.56993	7.32625	2.40461	1.88598	2.32855
Os02g0209400|mRNA|AK108109|CDS+3'UTR	Os02g0209400	Conserved hypothetical protein.	3.17701	3.41599	4.17371	3.57264	4.33057
Os02g0215000|mRNA|AK072483|CDS+3'UTR	Os02g0215000	Conserved hypothetical protein.	5.68981	3.33065	2.06114	1.43042	0.987764
Os02g0215600|mRNA|AK110959|CDS+3'UTR	Os02g0215600	Hypothetical protein.	0.896073	1.1653	1.42662	4.47167	4.60052
Os02g0216300|mRNA|AK060730|CDS+3'UTR	Os02g0216300	Similar to cDNA clone:J023088C01, full insert sequence.	0.0935148	0.0682373	0.136723	0.272556	0.548344
Os02g0216300|mRNA|AK061431|CDS+3'UTR	Os02g0216300	Similar to cDNA clone:J023088C01, full insert sequence.	0.161794	0.0823264	0.174169	0.267596	0.531208
Os02g0216300|mRNA|AK061737|CDS+3'UTR	Os02g0216300	Similar to cDNA clone:J023088C01, full insert sequence.	0.3232	0.270661	0.401386	0.33	0.63381
Os02g0216300|mRNA|AK070589|CDS+3'UTR	Os02g0216300	Similar to cDNA clone:J023088C01, full insert sequence.	0.284079	0.24014	0.399074	0.33623	0.720117
Os02g0216300|mRNA|AK102090|CDS+3'UTR	Os02g0216300	Similar to cDNA clone:J023088C01, full insert sequence.	0.300199	0.128941	0.160215	0.312752	0.570666
Os02g0216300|mRNA|AK102313|CDS+3'UTR	Os02g0216300	Similar to cDNA clone:J023088C01, full insert sequence.	0.145354	0.0878983	0.151872	0.240611	0.528045
Os02g0216300|mRNA|AK104214|CDS+3'UTR	Os02g0216300	Similar to cDNA clone:J023088C01, full insert sequence.	0.316896	0.277919	0.420694	0.32963	0.644
Os02g0217900|COMBINER_EST|Os02g0217900|8	Os02g0217900	Similar to Cytosolic class II small heat shock protein 4 (Fragment).	18.0077	16.6365	15.4035	9.41653	3.14126
Os02g0219200|mRNA|AK059794|CDS+3'UTR	Os02g0219200	Similar to Beta-galactosidase.	0.382505	0.295086	0.347843	0.31169	0.56741
Os02g0222500|mRNA|AK101952|CDS+3'UTR	Os02g0222500	Conserved hypothetical protein.	12.2577	16.9702	3.12888	1.3145	0.690019
Os02g0225500|COMBINER_EST|Os02g0225500|8	Os02g0225500	Conserved hypothetical protein.	1.35473	1.43951	0.821089	6.72027	6.99328
Os02g0227000|COMBINER_EST|CI372493|3	Os02g0227000	HAD superfamily hydrolase-like, type 3 domain containing protein.	25.126	13.8621	6.45367	2.6847	1.58935
Os02g0227100|mRNA|AK066722|CDS+3'UTR	Os02g0227100	Conserved hypothetical protein.	0.726225	1.82714	5.86162	3.39659	5.00172
Os02g0228300|mRNA|AK111620|CDS+3'UTR	Os02g0228300	Protein kinase, core domain containing protein.	0.117631	0.252024	0.697197	0.796766	1.75577
Os02g0228900|mRNA|AK121870|CDS+3'UTR	Os02g0228900	Similar to Auxin-responsive protein IAA18 (Indoleacetic acid-induced protein 18).	0.475418	0.419944	0.419142	0.226247	0.279208
Os02g0230100|mRNA|AK101441|CDS+3'UTR	Os02g0230100	Leucine-rich repeat, SDS22 containing protein.	6.19318	3.49842	2.09692	1.24346	0.838901
Os02g0230300|mRNA|AK058752|CDS+3'UTR	Os02g0230300	En/Spm-like transposon protein (Protodermal factor 1).	0.459269	0.141114	0.0654069	0.0658563	0.0911987
Os02g0232100|mRNA|AK108775|CDS+3'UTR	Os02g0232100	Similar to DNA binding protein.	0.623844	3.54086	4.37055	9.25708	5.46029
Os02g0238500|mRNA|AK068881|CDS+3'UTR	Os02g0238500	Scramblase family protein.	6.14705	3.92504	4.72895	7.11549	10.2371
Os02g0241700|COMBINER_EST|Os02g0241700|8	Os02g0241700	UDP-glucuronosyl/UDP-glucosyltransferase family protein.	1.64138	1.14336	1.5184	8.60857	18.8769
Os02g0245800|mRNA|AK100808|5'UTR+CDS	Os02g0245800	Similar to Inward rectifying shaker K+ channel.	0.667034	0.924163	0.880712	0.235038	0.233308
Os02g0255700|mRNA|AK060468|CDS+3'UTR	Os02g0255700	Hypothetical conserved gene.	0.255629	0.287132	0.548414	0.207234	0.284567
Os02g0255700|mRNA|AK067390|CDS+3'UTR	Os02g0255700	Conserved hypothetical protein.	0.229233	0.253123	0.539287	0.179985	0.279105
Os02g0256100|mRNA|AK059595|CDS+3'UTR	Os02g0256100	Pectin lyase fold/virulence factor domain containing protein.	0.52358	0.270004	0.282504	0.351879	0.581056
Os02g0256100|mRNA|AK061146|CDS+3'UTR	Os02g0256100	Pectin lyase fold/virulence factor domain containing protein.	0.556508	0.271621	0.303608	0.365589	0.628466
Os02g0256100|mRNA|AK106194|CDS+3'UTR	Os02g0256100	Pectin lyase fold/virulence factor domain containing protein.	0.496959	0.269761	0.27255	0.348739	0.549599
Os02g0257200|mRNA|AK103494|CDS+3'UTR	Os02g0257200	Conserved hypothetical protein.	31.1646	39.1244	41.2399	2.46672	2.01692
Os02g0258200|mRNA|AK070270|CDS+3'UTR	Os02g0258200	High mobility group, HMG1/HMG2 domain containing protein.	0.633163	0.145013	0.253642	0.0900022	0.346543
Os02g0259900|mRNA|AK063689|CDS+3'UTR	Os02g0259900	Conserved hypothetical protein.	24.7479	28.2311	25.794	9.26791	4.25074
Os02g0260700|mRNA|AK099509|CDS+3'UTR	Os02g0260700	Similar to GAMYB-binding protein.	1.06881	1.61222	2.03459	3.19405	3.2974
Os02g0265700|mRNA|AK100882|CDS+3'UTR	Os02g0265700	Hypothetical conserved gene.	0.401972	0.297902	0.313673	0.406618	0.525454
Os02g0274900|mRNA|AK073268|CDS+3'UTR	Os02g0274900	Similar to metabolite transport protein csbC.	3.90341	3.31645	2.21382	1.04863	0.839101
Os02g0274900|mRNA|AK073967|CDS+3'UTR	Os02g0274900	Similar to metabolite transport protein csbC.	4.12074	3.46205	2.23426	1.06067	0.860783
Os02g0276200|COMBINER_EST|CI461237|0	Os02g0276200	Similar to isochorismatase family protein rutB.	0.186569	0.186582	0.903143	1.15857	6.36318
Os02g0280700|mRNA|AK065581|CDS+3'UTR	Os02g0280700	Similar to Iron/ascorbate-dependent oxidoreductase.	0.702774	0.549653	0.434975	0.252085	0.27484
Os02g0284800|mRNA|AK109169|CDS+3'UTR	Os02g0284800	Conserved hypothetical protein.	9.21111	6.69753	4.60976	2.44097	2.00033
Os02g0285800|mRNA|AK060415|CDS+3'UTR	Os02g0285800	Similar to predicted protein.	0.68278	0.49491	0.319689	0.285949	0.285536
Os02g0285800|mRNA|AK072177|CDS+3'UTR	Os02g0285800	Similar to GTP-binding protein typA (Tyrosine phosphorylated protein A).	0.694133	0.516769	0.385078	0.323289	0.293436
Os02g0285800|mRNA|AK099035|CDS+3'UTR	Os02g0285800	Similar to GTP-binding protein typA (Tyrosine phosphorylated protein A).	0.69445	0.498624	0.325096	0.289664	0.284747
Os02g0288100|mRNA|AK107019|CDS+3'UTR	Os02g0288100	Similar to Pectinesterase (EC 3.1.1.11) (Fragment).	1.35101	0.543425	7.15061	0.107771	0.101345
Os02g0296300|COMBINER|CI137658|6	Os02g0296300	Hypothetical conserved gene.	17.6355	6.00809	3.6749	1.67021	1.18314
Os02g0306900|mRNA|AK070441|CDS+3'UTR	Os02g0306900	Similar to DnaJ-like protein.	1.22999	0.774043	0.51042	0.245503	0.206702
Os02g0308400|mRNA|AK061195|CDS+3'UTR	Os02g0308400	FAS1 domain domain containing protein.	0.52519	0.238918	0.30628	0.303518	0.588639
Os02g0308400|mRNA|AK061421|CDS+3'UTR	Os02g0308400	FAS1 domain domain containing protein.	0.516764	0.226499	0.297904	0.351807	0.682485
Os02g0308400|mRNA|AK104181|CDS+3'UTR	Os02g0308400	FAS1 domain domain containing protein.	0.544626	0.249569	0.306954	0.264329	0.519713
Os02g0308400|mRNA|AK104630|CDS+3'UTR	Os02g0308400	FAS1 domain domain containing protein.	0.526599	0.235647	0.295997	0.286141	0.554707
Os02g0308400|mRNA|AK104655|CDS+3'UTR	Os02g0308400	FAS1 domain domain containing protein.	0.542352	0.257845	0.286746	0.317803	0.534594
Os02g0308800|mRNA|AK060903|CDS+3'UTR	Os02g0308800	FAS1 domain domain containing protein.	0.140325	0.307456	0.917966	0.690588	4.2429
Os02g0308800|mRNA|AK104098|CDS+3'UTR	Os02g0308800	FAS1 domain domain containing protein.	0.290521	0.310571	0.705821	0.585692	3.39955
Os02g0308800|mRNA|AK104533|CDS+3'UTR	Os02g0308800	FAS1 domain domain containing protein.	0.190385	0.271224	0.677328	0.60477	3.13891
Os02g0320800|mRNA|AK111474|CDS+3'UTR	Os02g0320800	Similar to Iron/ascorbate-dependent oxidoreductase.	0.493962	0.969317	0.233883	0.444512	0.320319
Os02g0324900|COMBINER|CI411818|6			1.21173	2.0026	2.06226	3.71643	3.26435
Os02g0433100|COMBINER_EST|CI201507|6			0.486821	0.300839	0.360382	0.289861	0.433631
Os02g0433600|mRNA|AK069790|CDS+3'UTR	Os02g0433600	Helix-loop-helix DNA-binding domain containing protein.	0.398961	0.281411	0.318868	0.314715	0.489821
Os02g0433600|mRNA|AK103986|CDS+3'UTR	Os02g0433600	Helix-loop-helix DNA-binding domain containing protein.	0.419515	0.278337	0.341919	0.299473	0.502051
Os02g0434800|COMBINER|CI271615|6			1.16834	0.801535	0.307332	0.130671	0.110712
Os02g0448000|COMBINER_EST|CI075703|0	Os02g0448000	Protein of unknown function DUF296 domain containing protein.	0.25435	0.311537	1.87303	1.01857	0.896822
Os02g0452700|mRNA|AK108220|CDS+3'UTR	Os02g0452700	Conserved hypothetical protein.	1.44104	1.08729	1.52161	9.83762	19.0402
Os02g0458900|COMBINER_EST|Os02g0458900|8	Os02g0458900	Hypothetical conserved gene.	6.5878	6.35921	3.17335	1.98848	1.17659
Os02g0459300|COMBINER_EST|Os02g0459300|8	Os02g0459300	Similar to tangled1.	0.883569	0.177173	0.247684	0.0487846	0.212858
Os02g0461600|mRNA|AK105240|CDS+3'UTR	Os02g0461600	Protein of unknown function DUF1777 domain containing protein.	0.968597	0.602823	0.409609	0.298814	0.292823
Os02g0462900|COMBINER_EST|CI518118|0	Os02g0462900	Prefoldin domain containing protein.	1.87751	0.807942	0.549382	0.278198	0.264788
Os02g0465900|mRNA|AK071205|CDS+3'UTR	Os02g0465900	ChaC-like protein family protein.	0.808851	1.34087	1.86742	3.58111	3.77627
Os02g0467000|COMBINER_EST|CI046098|5	Os02g0467000	Similar to Cinnamate 4-hydroxylase CYP73.	2.00596	15.6895	44.7452	3.32555	2.21774
Os02g0467600|mRNA|AK072588|CDS+3'UTR	Os02g0467600	Similar to Cinnamate 4-hydroxylase CYP73.	1.92419	15.0975	41.2875	3.91849	2.50206
Os02g0468200|mRNA|AK103767|CDS+3'UTR	Os02g0468200	Protein of unknown function DUF652 family protein.	0.848366	0.688987	0.603798	4.25534	3.32877
Os02g0475400|mRNA|AK121008|CDS+3'UTR	Os02g0475400	Bile acid:sodium symporter family protein.	2.10645	3.34756	3.0764	5.37439	3.2339
Os02g0483500|mRNA|AK103708|CDS+3'UTR	Os02g0483500	Transferase family protein.	1.73924	4.15707	11.0384	2.93404	2.89767
Os02g0489800|COMBINER|CI078777|6	Os02g0489800	Similar to SKIP interacting protein 18 (Fragment).	1.20414	0.316635	0.403793	0.20863	0.315584
Os02g0490000|mRNA|AK106789|CDS+3'UTR	Os02g0490000	Zinc finger, RING/FYVE/PHD-type domain containing protein.	0.476311	0.353816	0.680038	0.139184	0.131579
Os02g0491400|mRNA|AK073233|CDS+3'UTR	Os02g0491400	Similar to Peptidylprolyl isomerase.	4.55503	4.71083	3.72092	2.76693	1.82256
Os02g0497600|mRNA|AK106982|CDS+3'UTR	Os02g0497600	Conserved hypothetical protein.	0.635357	1.94875	5.89483	1.73617	3.34497
Os02g0498100|mRNA|AK112058|CDS+3'UTR	Os02g0498100	Conserved hypothetical protein.	1.86481	2.08526	2.30293	4.67232	4.06736
Os02g0503300|COMBINER|CI149316|6	Os02g0503300	Similar to glucan endo-1,3-beta-glucosidase 4.	0.0858625	0.128462	0.160511	0.212317	0.296064
Os02g0503500|COMBINER_EST|CI555084|3	Os02g0503500	Similar to 3-oxoacyl-[acyl-carrier-protein] reductase, chloroplast precursor (EC 1.1.1.100) (3-ketoacyl-acyl carrier protein reductase).	0.467275	0.102389	0.232988	0.275624	0.229363
Os02g0503700|COMBINER_EST|Os02g0503700|8	Os02g0503700	Similar to Cytochrome P450 CYP81L6.	0.648087	0.260829	0.303999	0.276369	0.60025
Os02g0503900|mRNA|AK100163|CDS+3'UTR	Os02g0503900	Cytochrome P450 family protein.	0.197706	0.180398	0.686756	0.480579	0.954502
Os02g0504800|mRNA|AK069683|CDS+3'UTR	Os02g0504800	Similar to Delta-9 stearoyl-acyl carrier protein desaturase (EC 1.14.99.6) (Fragment).	2.87858	3.60541	5.07047	4.01771	3.60306
Os02g0507400|mRNA|AK109669|CDS+3'UTR	Os02g0507400	Hypothetical conserved gene.	1.07113	1.65791	2.26196	4.49148	3.57839
Os02g0511800|mRNA|AK069817|CDS+3'UTR	Os02g0511800	Conserved hypothetical protein.	0.313814	0.159448	0.335069	0.378413	0.413825
Os02g0512400|mRNA|AK073461|CDS+3'UTR	Os02g0512400	Similar to Glutaredoxin.	0.837708	1.18921	0.473386	0.30298	0.247722
Os02g0514600|COMBINER_EST|Os02g0514600|8			0.957503	0.687088	0.680005	0.305303	0.263382
Os02g0527300|mRNA|AK101934|CDS+3'UTR	Os02g0527300	Similar to Heat shock transcription factor 31 (Fragment).	5.48516	3.03244	3.4538	6.24789	4.76061
Os02g0530100|mRNA|AF198626|CDS+3'UTR	Os02g0530100	Copper chaperone homolog CCH.	0.139624	0.166972	0.357815	0.459373	0.703108
Os02g0530100|mRNA|AK058520|CDS+3'UTR	Os02g0530100	Heavy metal transport/detoxification protein domain containing protein.	0.142246	0.171775	0.368074	0.45887	0.696893
Os02g0530100|mRNA|AK121599|CDS+3'UTR	Os02g0530100	Copper chaperone homolog CCH.	0.136732	0.164676	0.355622	0.438399	0.710614
Os02g0533700|COMBINER_EST|CI364879|5	Os02g0533700	Conserved hypothetical protein.	0.303261	0.91439	5.32718	3.14589	6.13393
Os02g0533800|mRNA|AK121139|CDS+3'UTR	Os02g0533800	Conserved hypothetical protein.	0.490162	1.14417	6.56924	12.4396	21.5098
Os02g0534400|mRNA|AB073749|CDS+3'UTR	Os02g0534400	Cell wall invertase (EC 3.2.1.26).	0.525364	0.214255	0.241416	0.306263	0.279811
Os02g0534400|mRNA|AK121403|CDS+3'UTR	Os02g0534400	Cell wall invertase (EC 3.2.1.26).	0.52191	0.188613	0.237786	0.316794	0.298916
Os02g0534400|mRNA|AY342319|CDS	Os02g0534400	Cell wall invertase (EC 3.2.1.26).	0.472427	0.181099	0.224367	0.261746	0.249333
Os02g0535700|mRNA|AK073473|CDS+3'UTR	Os02g0535700	Protein of unknown function DUF1022 family protein.	6.2392	5.25931	2.71083	2.2837	1.69506
Os02g0536500|mRNA|AK073251|CDS+3'UTR	Os02g0536500	Conserved hypothetical protein.	0.725745	0.565147	0.450327	0.212171	0.229962
Os02g0537000|mRNA|AK062855|CDS+3'UTR	Os02g0537000	Pectinesterase inhibitor domain containing protein.	14.5422	20.3449	13.4563	5.4869	2.61179
Os02g0539600|mRNA|AK059666|CDS+3'UTR	Os02g0539600	Homeodomain-like containing protein.	0.670572	0.724415	1.30599	3.81647	3.26248
Os02g0541000|mRNA|AK107551|CDS+3'UTR	Os02g0541000	Conserved hypothetical protein.	1.22487	0.966468	0.849987	3.46441	3.09482
Os02g0543200|mRNA|AK100963|CDS+3'UTR	Os02g0543200	Cyclin-like F-box domain containing protein.	0.857697	0.643491	0.76576	0.324881	0.296119
Os02g0546500|COMBINER_EST|CI053324|0	Os02g0546500	Hypothetical conserved gene.	38.6064	13.9557	14.2713	2.87368	2.10649
Os02g0546600|mRNA|AK107852|CDS+3'UTR	Os02g0546600	Similar to AP2 domain containing protein RAP2.2 (Fragment).	231.718	204.398	96.5475	4.57244	4.6307
Os02g0546800|COMBINER|CI226343|6	Os02g0546800	Similar to OSIGBa0093L02.1 protein.	278.452	189.824	73.6204	7.05007	6.15636
Os02g0552100|mRNA|AK100075|CDS+3'UTR	Os02g0552100	Pentatricopeptide repeat domain containing protein.	3.05743	3.35056	3.18574	2.51294	2.44114
Os02g0557600|mRNA|AK064926|CDS+3'UTR	Os02g0557600	Translation initiation factor SUI1 domain containing protein.	4.75606	5.27702	4.36977	3.88688	2.44226
Os02g0557800|mRNA|AK069453|CDS+3'UTR	Os02g0557800	A-type response regulator 2.;Cytokinin signalling.	0.650398	0.512196	0.399931	0.288203	0.29186
Os02g0559400|mRNA|AK059887|CDS+3'UTR	Os02g0559400	Similar to Oxo-phytodienoic acid reductase.	3.67321	3.27704	1.40597	0.522334	0.483366
Os02g0559400|mRNA|AK069898|CDS+3'UTR	Os02g0559400	Similar to Oxo-phytodienoic acid reductase.	3.68945	3.28163	1.41578	0.510626	0.476689
Os02g0561000|COMBINER|CI563011|x	Os02g0561000	E3 ubiquitin ligase EL5 (EC 6.3.2.-).	3.09143	3.92968	1.4764	1.33818	1.82988
Os02g0565600|mRNA|AF145731|CDS+3'UTR	Os02g0565600	Similar to Homeodomain leucine zipper protein (Fragment).	0.478997	0.945625	1.58863	4.13496	4.70029
Os02g0574500|mRNA|AK059863|CDS+3'UTR	Os02g0574500	Hypothetical conserved gene.	0.72744	0.818069	0.897849	0.134249	0.0421
Os02g0574500|mRNA|AK065365|CDS+3'UTR	Os02g0574500	Conserved hypothetical protein.	0.730503	0.817212	0.88494	0.131876	0.0400725
Os02g0574500|mRNA|AK103980|CDS+3'UTR	Os02g0574500	Conserved hypothetical protein.	0.730568	0.784094	0.836633	0.128217	0.0467285
Os02g0574800|mRNA|AK108451|CDS+3'UTR	Os02g0574800	Ethylene insensitive 3 domain containing protein.	2.05408	3.57949	5.55051	4.31049	6.6161
Os02g0575200|mRNA|AK069567|CDS+3'UTR	Os02g0575200	DNA/pantothenate metabolism flavoprotein, C-terminal domain containing protein.	0.504025	0.282136	0.334383	0.20882	0.389247
Os02g0575500|mRNA|AK058407|CDS+3'UTR	Os02g0575500	Similar to ATATH13.	0.902671	1.25138	1.08007	0.271232	0.175465
Os02g0575500|mRNA|AK099974|CDS+3'UTR	Os02g0575500	Similar to ABC transporter-like.	0.979624	1.45295	1.24483	0.274458	0.198991
Os02g0576600|mRNA|AB091674|CDS+3'UTR	Os02g0576600	Sucrose transporter.	0.327341	0.269433	0.296321	0.219665	0.196031
Os02g0576600|mRNA|AK073105|CDS+3'UTR	Os02g0576600	Sucrose transporter.	0.355401	0.269667	0.269255	0.220523	0.176247
Os02g0580500|mRNA|AK108467|CDS+3'UTR	Os02g0580500	Similar to Prohibitin.	4.7606	4.01588	2.08817	1.82276	1.59967
Os02g0581000|COMBINER_EST|CI123794|6	Os02g0581000	Similar to predicted protein.	0.875176	0.48321	0.322431	0.31003	0.306614
Os02g0583700|COMBINER_EST|AU095601|6	Os02g0583700	Conserved hypothetical protein.	12.7423	23.517	12.5711	12.0725	4.07478
Os02g0585500|COMBINER|CI511790|5			0.766379	0.341917	0.307566	0.300047	0.413993
Os02g0586900|mRNA|AK063583|CDS+3'UTR	Os02g0586900	Similar to Glycine rich protein (Fragment).	1.12074	1.70405	3.86983	10.2409	22.7968
Os02g0586900|mRNA|AK105378|CDS+3'UTR	Os02g0586900	Hypothetical conserved gene.	1.74155	1.91922	4.3938	10.1001	24.917
Os02g0588600|mRNA|AK066774|CDS+3'UTR	Os02g0588600	Conserved hypothetical protein.	6.56711	6.51281	4.21523	3.39269	3.34911
Os02g0589400|COMBINER_EST|CI359035|3	Os02g0589400	UDP-glucuronosyl/UDP-glucosyltransferase family protein.	0.257257	0.146634	0.183134	0.181353	0.208563
Os02g0590400|mRNA|AK061704|CDS+3'UTR	Os02g0590400	Lecithin:cholesterol acyltransferase family protein.	0.231475	0.294419	0.77669	0.609109	0.80274
Os02g0590400|mRNA|AK104403|CDS+3'UTR	Os02g0590400	Lecithin:cholesterol acyltransferase family protein.	0.241429	0.301385	0.813832	0.61958	0.841261
Os02g0591000|mRNA|AK068298|UTR	Os02g0591000	Hypothetical conserved gene.	1.32042	4.44964	3.88491	3.11758	2.55213
Os02g0593500|mRNA|AK067498|CDS+3'UTR	Os02g0593500	Phosphate transporter family protein.	0.928792	1.7083	0.662699	0.135819	0.0778507
Os02g0593500|mRNA|AK104702|CDS+3'UTR	Os02g0593500	Similar to Phosphate transporter 2-1.	1.0268	1.61741	1.02228	0.156847	0.0819592
Os02g0596200|mRNA|AK109907|CDS+3'UTR	Os02g0596200	Glycoside hydrolase, family 5 protein.	0.422454	0.238449	2.22787	3.06198	3.63803
Os02g0596300|mRNA|AK109775|CDS+3'UTR	Os02g0596300	Cytochrome P450 family protein.	0.215781	0.295567	1.541	1.08502	1.94788
Os02g0597200|mRNA|AK064896|CDS+3'UTR	Os02g0597200	Hypothetical protein.	74.6641	38.5415	4.7002	2.26464	1.69718
Os02g0597300|mRNA|AK064487|CDS+3'UTR	Os02g0597300	Hypothetical protein.	10.7825	7.93693	5.40702	3.3856	2.01716
Os02g0598400|mRNA|AK109577|CDS+3'UTR	Os02g0598400	Hypothetical conserved gene.	3.3986	3.45316	2.62705	1.63457	0.995391
Os02g0598500|mRNA|AK106903|CDS+3'UTR	Os02g0599150	Hypothetical conserved gene.	0.745164	0.418181	0.350475	0.233558	0.248295
Os02g0598800|COMBINER_EST|CI140231|6	Os02g0598800	Conserved hypothetical protein.	0.839251	0.430228	0.37456	0.25542	0.288132
Os02g0606200|mRNA|AB001885|CDS+3'UTR	Os02g0606200	Zinc finger, B-box domain containing protein.	0.60485	0.976644	1.19088	0.179608	0.159737
Os02g0606200|mRNA|AK061044|CDS+3'UTR	Os02g0606200	Zinc finger, B-box domain containing protein.	0.629318	1.07085	1.24578	0.290604	0.216708
Os02g0606200|mRNA|AK104293|CDS+3'UTR	Os02g0606200	Zinc finger, B-box domain containing protein.	0.636308	1.08018	1.28945	0.305297	0.242638
Os02g0612000|COMBINER_EST|CI398763|6	Os02g0612000	Similar to GrpE protein homolog.	11.8532	6.46943	3.68894	1.79869	1.22112
Os02g0612200|mRNA|AK110995|CDS+3'UTR	Os02g0612200	NB-ARC domain containing protein.	4.01531	3.38702	1.66611	1.21855	1.03864
Os02g0612600|mRNA|AK062519|CDS+3'UTR	Os02g0612600	Conserved hypothetical protein.	0.680984	1.3039	1.7969	3.77564	3.88287
Os02g0613900|mRNA|AK069606|CDS+3'UTR	Os02g0613900	Similar to adenine phosphoribosyltransferase 2.	0.583175	0.338946	0.312767	0.324696	0.345333
Os02g0613900|mRNA|AK070784|CDS+3'UTR	Os02g0613900	Similar to Adenine phosphoribosyltransferase 2 (EC 2.4.2.7) (APRT).	0.636031	0.313098	0.328326	0.328365	0.400883
Os02g0615500|mRNA|AK100073|CDS+3'UTR	Os02g0615500	Protein kinase, core domain containing protein.	2.77025	5.20223	4.57767	5.20206	4.81632
Os02g0617600|mRNA|AK107050|CDS+3'UTR	Os02g0617600	Protein phosphatase 2A, regulatory subunit PR55 domain containing protein.	1.21023	1.64263	0.797744	0.250696	0.263452
Os02g0617600|mRNA|AK111533|CDS+3'UTR	Os02g0617600	Conserved hypothetical protein.	0.930013	1.08475	0.67074	0.123802	0.0895279
Os02g0617600|mRNA|AK111600|CDS+3'UTR	Os02g0617600	Protein phosphatase 2A, regulatory subunit PR55 domain containing protein.	0.828742	1.10398	0.813958	0.156906	0.0854859
Os02g0619600|mRNA|AK072178|CDS+3'UTR	Os02g0619600	Zinc finger, RING/FYVE/PHD-type domain containing protein.	0.767391	0.949091	0.66153	0.246085	0.280877
Os02g0621400|mRNA|AK108224|CDS+3'UTR	Os02g0621400	Conserved hypothetical protein.	1.60787	1.28961	1.50371	3.05248	5.699
Os02g0622500|mRNA|AK067651|CDS+3'UTR	Os02g0622500	RNA recognition motif-related domain containing protein.	31	15.9875	11.668	5.26136	3.88172
Os02g0625500|mRNA|AK059188|CDS+3'UTR	Os02g0625500	Similar to Adenosine kinase-like protein (Fragment).	0.645242	0.296501	0.353945	0.319642	0.352568
Os02g0628200|mRNA|AK059676|CDS+3'UTR	Os02g0628200	Similar to Integral membrane protein like.	0.457417	0.314789	0.371206	0.270458	0.309956
Os02g0629000|mRNA|AK062480|CDS+3'UTR	Os02g0629000	Protein of unknown function DUF584 family protein.	4.4867	6.84089	6.43229	2.07211	5.02196
Os02g0631200|mRNA|AK105924|CDS+3'UTR	Os02g0631200	Similar to cDNA clone:J023088J02, full insert sequence.	1.57177	2.33815	3.79236	6.91569	7.11952
Os02g0631700|COMBINER_EST|Os02g0631700|8	Os02g0631700	A-type response regulator 11.;Cytokinin signalling.	0.316467	0.388899	0.494023	0.338495	0.300721
Os02g0632500|mRNA|AK101701|CDS+3'UTR	Os02g0632500	Arf GTPase activating protein family protein.	0.604847	0.322422	0.224069	0.244611	0.229718
Os02g0634700|mRNA|AK069959|CDS+3'UTR	Os02g0634700	Similar to Serine carboxypeptidase II-like protein.	0.417817	0.467062	0.759506	3.72722	3.45783
Os02g0634700|mRNA|AK104329|CDS+3'UTR	Os02g0634700	Similar to Serine carboxypeptidase II-like protein.	0.528665	0.489517	0.858871	3.11994	3.1601
Os02g0634700|mRNA|AK104431|CDS+3'UTR	Os02g0634700	Similar to Serine carboxypeptidase II-like protein.	0.477076	0.53569	0.856709	3.32808	3.17131
Os02g0635200|mRNA|AB027054|CDS	Os02g0635200	Similar to Nitrilase 2 (EC 3.5.5.1).	4.62839	5.78186	4.43315	2.42158	1.36295
Os02g0635200|mRNA|AK069985|CDS+3'UTR	Os02g0635200	Similar to Nitrilase 2 (EC 3.5.5.1).	4.08866	5.60772	4.22551	2.40858	1.53635
Os02g0635200|mRNA|AK104033|CDS+3'UTR	Os02g0635200	Similar to Nitrilase 2 (EC 3.5.5.1).	4.14488	5.84759	4.488	2.30464	1.57547
Os02g0635200|mRNA|AK121244|CDS+3'UTR	Os02g0635200	Similar to Nitrilase 2 (EC 3.5.5.1).	4.46537	5.94316	4.56604	2.34795	1.60351
Os02g0638200|COMBINER_EST|CI438959|6	Os02g0638200	Conserved hypothetical protein.	0.674068	0.280716	0.29162	0.179959	0.366616
Os02g0639500|COMBINER_EST|CI403253|6	Os02g0639500	Similar to Expansin-B16.	0.187577	0.184085	0.349042	0.381661	0.515956
Os02g0642300|mRNA|AK062638|CDS+3'UTR	Os02g0642300	Cytochrome b561 family protein.	6.73554	8.6985	6.43457	4.5781	3.90755
Os02g0643800|COMBINER_EST|CI556117|0	Os02g0643800	Auxin responsive SAUR protein family protein.	2.65271	3.6036	3.55819	1.34197	1.69903
Os02g0644000|mRNA|AB081464|CDS+3'UTR	Os02g0644000	Similar to C13 cysteine proteinase.	1.87937	2.46526	2.69724	3.67646	3.58116
Os02g0644000|mRNA|AK070079|CDS+3'UTR	Os02g0644000	Similar to C13 endopeptidase NP1 (Fragment).	2.04691	2.59298	2.99238	5.08469	4.60022
Os02g0644000|mRNA|AK101360|CDS+3'UTR	Os02g0644000	Similar to C13 cysteine proteinase.	2.00306	2.64243	2.8337	4.56736	4.40449
Os02g0644000|mRNA|AY062178|CDS+3'UTR	Os02g0644000	Similar to C13 cysteine proteinase.	1.87136	2.47583	2.72193	3.75504	3.61411
Os02g0644100|mRNA|AK102431|CDS+3'UTR	Os02g0644100	Similar to Heat shock protein STI (Stress inducible protein) (GmSTI).	3.82153	3.17431	2.34819	1.87042	1.38316
Os02g0645000|mRNA|AK111136|CDS+3'UTR	Os02g0645000	Zinc finger, RING/FYVE/PHD-type domain containing protein.	0.360832	0.406899	0.275178	0.241324	0.266921
Os02g0649300|mRNA|AK063685|CDS+3'UTR	Os02g0649300	Similar to Short highly repeated, interspersed DNA (Fragment).	3.8987	8.4065	11.2243	1.78187	3.75984
Os02g0649400|COMBINER_EST|Os02g0649400|8	Os02g0649400	Similar to predicted protein.	5.05383	2.52795	1.67351	0.217257	0.14228
Os02g0651500|mRNA|AK058970|UTR	Os02g0651500	Non-protein coding transcript.	0.992163	0.439015	0.212862	0.24632	0.479323
Os02g0651500|mRNA|AK121865|CDS+3'UTR	Os02g0651500	Hypothetical protein.	1.14536	0.507714	0.244605	0.204485	0.356081
Os02g0654700|mRNA|AK073812|CDS+3'UTR	Os02g0654700	APETALA2 (AP2) gene 59.;Abiotic stress.;AP2/ERF family protein.	4.76646	4.67923	2.18741	2.45208	3.9894
Os02g0654700|mRNA|AK105940|CDS+3'UTR	Os02g0654700	APETALA2 (AP2) gene 59.;Abiotic stress.;AP2/ERF family protein.	4.99214	4.48281	2.22632	1.96301	3.23685
Os02g0655100|mRNA|AK073123|CDS+3'UTR	Os02g0655100	Uncharacterised protein family UPF0565 domain containing protein.	1.78395	2.66407	2.80726	4.03406	3.91749
Os02g0657100|COMBINER_EST|Os02g0657100|8			1.27182	1.07101	1.10418	5.21873	5.38981
Os02g0658200|mRNA|AK121046|CDS+3'UTR	Os02g0658200	Zinc finger, PHD-type domain containing protein.	3.29479	3.80935	3.61721	1.09095	1.01216
Os02g0658800|mRNA|AK059638|CDS+3'UTR	Os02g0658800	Beta-expansin.	0.165215	0.215974	0.347186	0.206181	0.383728
Os02g0658800|mRNA|AY046927|UTR	Os02g0658800	Beta-expansin.	0.161984	0.225617	0.360459	0.175128	0.287008
Os02g0668000|mRNA|AK101871|CDS+3'UTR	Os02g0668000	Membrane protein, At2g17000, predicted domain containing protein.	36.0011	29.6508	13.276	5.04199	2.52318
Os02g0668000|mRNA|AK108411|CDS+3'UTR	Os02g0668000	Similar to Mechanosensitive ion channel (Fragment).	44.2647	23.3327	4.33512	1.02285	1.23742
Os02g0671100|mRNA|AK100120|CDS+3'UTR	Os02g0671100	Cyclin-like F-box domain containing protein.	1.90535	4.25381	14.2207	2.23829	4.32948
Os02g0673100|mRNA|AK108963|CDS+3'UTR	Os02g0673100	Uncharacterised protein family UPF0005 domain containing protein.	0.69665	4.32921	5.18681	4.4546	3.49656
Os02g0673200|COMBINER_EST|Os02g0673200|8			1.43686	1.36674	1.36066	3.8648	5.37035
Os02g0677300|mRNA|AK060550|CDS+3'UTR	Os02g0677300	Similar to CRT/DRE binding factor 1.	2.03286	0.71312	0.311276	0.0378693	0.245363
Os02g0683800|mRNA|AK072580|CDS+3'UTR	Os02g0683800	Conserved hypothetical protein.	0.397793	0.115451	0.586796	0.222802	0.223162
Os02g0685200|mRNA|AK111726|CDS+3'UTR	Os02g0685200	Homeodomain-like containing protein.	9.835	9.35183	3.05756	0.32777	0.451838
Os02g0686500|mRNA|AK073456|CDS+3'UTR	Os02g0686500	Conserved hypothetical protein.	0.411506	0.299811	0.229759	0.227767	0.212909
Os02g0687600|mRNA|AK100994|CDS+3'UTR	Os02g0687600	Hypothetical protein.	0.868031	1.74235	2.13656	4.44165	4.01073
Os02g0687900|mRNA|AK064814|CDS+3'UTR	Os02g0687900	Peptidase S10, serine carboxypeptidase family protein.	0.60701	0.518742	0.571693	0.332991	0.236682
Os02g0690000|mRNA|AK062737|CDS+3'UTR	Os02g0690000	Conserved hypothetical protein.	0.852665	1.98862	4.19361	10.1382	12.6065
Os02g0690100|COMBINER_EST|Os02g0690100|8			1.18517	1.56833	3.36787	2.43113	4.62389
Os02g0691500|mRNA|AK060695|CDS+3'UTR	Os02g0691500	Conserved hypothetical protein.	0.299616	0.413352	0.385326	0.283697	0.390082
Os02g0692700|mRNA|AK066953|CDS+3'UTR	Os02g0692700	Protein of unknown function DUF597 family protein.	5.9461	3.92655	2.47282	1.30967	1.55492
Os02g0692700|mRNA|AK104818|CDS+3'UTR	Os02g0692700	Protein of unknown function DUF597 family protein.	5.91086	3.86412	2.46765	1.33322	1.59285
Os02g0693700|mRNA|AK106518|CDS+3'UTR	Os02g0693700	Hypothetical conserved gene.	0.595085	0.476061	0.331471	0.218839	0.439894
Os02g0697500|mRNA|AK105680|CDS+3'UTR	Os02g0697500	Similar to Selenium-binding protein-like.	1.08554	1.44723	1.41704	0.28823	0.0786743
Os02g0699300|mRNA|AK067761|CDS+3'UTR	Os02g0699300	Similar to ADP-ribosylation factor-like protein.	11.1096	7.96776	5.02035	3.19943	2.18373
Os02g0699500|mRNA|AK062786|CDS+3'UTR	Os02g0699500	Hypothetical protein.	1.06656	0.275502	0.319657	0.240299	0.522141
Os02g0700100|mRNA|AK102954|CDS+3'UTR	Os02g0700100	Similar to WD-repeat protein.	1.23711	0.268599	0.267302	0.194862	0.467173
Os02g0706600|COMBINER_EST|CI055726|6	Os02g0706600	Hypothetical conserved gene.	0.819584	0.760258	0.499218	0.279303	0.268955
Os02g0706900|COMBINER_EST|CI555624|0	Os02g0706900	Alpha/beta hydrolase family protein.	0.306893	0.263382	1.53223	2.49597	2.82903
Os02g0710700|COMBINER_EST|Os02g0710700|8	Os02g0710700	Hypothetical conserved gene.	0.650237	0.443402	0.388868	0.29275	0.323826
Os02g0711300|mRNA|AK107963|CDS+3'UTR	Os02g0711300	Heat shock protein Hsp20 domain containing protein.	141.342	97.2779	35.3792	12.4961	3.80662
Os02g0714100|mRNA|AK071194|CDS+3'UTR	Os02g0714100	Diacylglycerol acyltransferase family protein.	3.54639	3.43128	2.01789	0.994185	0.742832
Os02g0719700|mRNA|AK119930|CDS+3'UTR	Os02g0719700	IQ calmodulin-binding region domain containing protein.	4.25884	4.28079	2.74455	2.32083	2.06437
Os02g0720100|mRNA|AK063724|CDS+3'UTR	Os02g0720100	Cupredoxin domain containing protein.	9.00489	11.2947	2.92271	0.577456	0.427599
Os02g0720900|mRNA|AK061307|CDS+3'UTR	Os02g0720900	Peptidase A1 domain containing protein.	0.145176	0.156749	0.436465	0.532897	1.07628
Os02g0720900|mRNA|AK061628|CDS+3'UTR	Os02g0720900	Peptidase A1 domain containing protein.	0.124253	0.147994	0.475398	0.637336	1.44033
Os02g0720900|mRNA|AK069691|UTR	Os02g0720900	Hypothetical conserved gene.	0.298801	0.300922	0.781198	1.14486	1.90836
Os02g0720900|mRNA|AK072228|CDS+3'UTR	Os02g0720900	Similar to Aspartic proteinase nepenthesin-1.	0.156814	0.186456	0.492525	0.687014	1.50207
Os02g0720900|mRNA|AK099781|CDS+3'UTR	Os02g0720900	Peptidase A1 domain containing protein.	0.133207	0.166984	0.526802	0.734453	1.6037
Os02g0720900|mRNA|AK121603|CDS+3'UTR	Os02g0720900	Hypothetical conserved gene.	0.456429	0.759748	3.69726	6.87201	9.18424
Os02g0724100|mRNA|AK107565|CDS+3'UTR	Os02g0724100	Conserved hypothetical protein.	0.355029	0.282472	0.215563	0.730259	0.969286
Os02g0726000|mRNA|AK072936|CDS+3'UTR	Os02g0726000	FAS1 domain domain containing protein.	0.929867	0.557984	0.482865	0.292838	0.317095
Os02g0726700|mRNA|AK064674|CDS+3'UTR	Os02g0726833	Non-protein coding transcript.	0.748848	0.523907	0.390436	0.303558	0.255757
Os02g0726700|mRNA|AK068228|CDS+3'UTR	Os02g0726700	Helix-loop-helix DNA-binding domain containing protein.	0.394919	0.275504	0.246793	0.145725	0.269978
Os02g0728600|mRNA|AK063054|CDS+3'UTR	Os02g0728600	Similar to H/ACA ribonucleoprotein complex subunit 2 (H/ACA snoRNP protein NHP2) (High mobility group-like nuclear protein 2).	3.17547	3.8589	2.8777	1.21256	1.01245
Os02g0729400|mRNA|AK058726|CDS+3'UTR	Os02g0729400	Similar to Extracellular calcium sensing receptor.	0.867774	0.966036	1.12738	0.153125	0.0232714
Os02g0729400|mRNA|AY476807|CDS+3'UTR	Os02g0729400	Similar to Extracellular calcium sensing receptor.	0.887067	0.844074	0.925843	0.0985599	0.0163779
Os02g0730000|mRNA|AB030939|CDS+3'UTR	Os02g0730000	Mitochondrial aldehyde dehydrogenase ALDH2a.	0.903388	1.85222	3.70347	4.39707	4.69079
Os02g0730000|mRNA|AK119320|CDS+3'UTR	Os02g0730000	Similar to Mitochondrial aldehyde dehydrogenase.	1.32304	8.18491	12.9111	8.92108	7.56227
Os02g0730000|mRNA|AK121610|CDS+3'UTR	Os02g0730000	Mitochondrial aldehyde dehydrogenase ALDH2a.	0.907821	2.22652	5.61641	6.04589	7.60966
Os02g0731300|mRNA|AK108784|UTR	Os02g0731300	Non-protein coding transcript.	27.2424	9.365	4.75993	0.612127	0.293761
Os02g0731400|COMBINER_EST|CI043585|0	Os02g0731400	Similar to Chemocyanin precursor (Basic blue protein) (Plantacyanin).	2.84098	3.85932	3.84934	2.07792	2.46607
Os02g0731500|COMBINER_EST|CI422411|0	Os02g0731500	Similar to cDNA, clone: J065098J18, full insert sequence.	0.321302	0.698528	1.76711	1.94388	3.66532
Os02g0733300|mRNA|AK101108|CDS+3'UTR	Os02g0733300	Similar to Endo-beta-1,4-glucanase precursor (EC 3.2.1.4).	0.748915	0.299763	0.246003	0.161364	0.242893
Os02g0733300|mRNA|AK105446|CDS+3'UTR	Os02g0733300	Similar to Endo-beta-1,4-glucanase precursor (EC 3.2.1.4).	0.783913	0.329265	0.278628	0.159504	0.278599
Os02g0733900|mRNA|AK111335|CDS+3'UTR	Os02g0733900	Conserved hypothetical protein.	7.35718	14.4297	3.31311	1.4803	1.00824
Os02g0734800|mRNA|AK109142|CDS+3'UTR	Os02g0734800	Protein of unknown function DUF26 domain containing protein.	2.88591	4.23048	3.08796	2.5106	1.92631
Os02g0735200|mRNA|AB037595|CDS+3'UTR	Os02g0735200	Glutamine synthetase shoot isozyme (EC 6.3.1.2) (Glutamate--ammonia ligase) (Clone lambda-GS28).	0.405775	0.176035	0.322266	0.21188	0.355614
Os02g0735200|mRNA|AK061157|CDS+3'UTR	Os02g0735200	Glutamine synthetase shoot isozyme (EC 6.3.1.2) (Glutamate--ammonia ligase) (Clone lambda-GS28).	0.436164	0.243785	0.356216	0.24481	0.384584
Os02g0735200|mRNA|AK071969|CDS+3'UTR	Os02g0735200	Glutamine synthetase shoot isozyme (EC 6.3.1.2) (Glutamate--ammonia ligase) (Clone lambda-GS28).	0.429946	0.238891	0.365909	0.250339	0.388915
Os02g0735200|mRNA|AK104987|CDS+3'UTR	Os02g0735200	Glutamine synthetase shoot isozyme (EC 6.3.1.2) (Glutamate--ammonia ligase) (Clone lambda-GS28).	0.43731	0.212449	0.378246	0.273883	0.461468
Os02g0735200|mRNA|AK109397|CDS+3'UTR	Os02g0735200	Glutamine synthetase shoot isozyme (EC 6.3.1.2) (Glutamate--ammonia ligase) (Clone lambda-GS28).	0.419048	0.196103	0.324914	0.175736	0.318623
Os02g0735200|mRNA|X14245|CDS+3'UTR	Os02g0735200	Glutamine synthetase shoot isozyme (EC 6.3.1.2) (Glutamate--ammonia ligase) (Clone lambda-GS28).	0.40791	0.187564	0.323759	0.169265	0.310403
Os02g0740300|mRNA|AK067833|CDS+3'UTR	Os02g0740300	ATPase, AAA-type, core domain containing protein.	7.87508	13.7034	8.74005	4.03954	2.34945
Os02g0740600|mRNA|AK107938|CDS+3'UTR	Os02g0740600	Conserved hypothetical protein.	4.45192	2.41418	1.91641	4.94744	4.97823
Os02g0744100|mRNA|AK061274|CDS+3'UTR	Os02g0744100	Methyltransferase type 11 domain containing protein.	1.43964	1.90748	1.86781	3.27697	3.17343
Os02g0744800|mRNA|AK110575|CDS+3'UTR	Os02g0744800	Conserved hypothetical protein.	2.94626	4.28872	3.32273	3.99157	3.68805
Os02g0744900|mRNA|AK098873|CDS+3'UTR	Os02g0744900	Similar to Geranylgeranyl reductase (Fragment).	0.989275	1.15112	1.15775	0.326233	0.148882
Os02g0745100|mRNA|AK069842|CDS+3'UTR	Os02g0745100	Nodulin 26-like intrinsic membrane protein 2;1.;Low silicon rice 1.;Silicon influx transporter.;Arsenic species (As) uptake.;Arsenite efflux.;Aquaporin NIP III subfamily.	3.03763	6.47636	5.70761	3.348	2.07384
Os02g0746900|COMBINER|AU075609|6			2.39886	2.95955	2.76894	3.85068	3.08009
Os02g0749200|mRNA|AK107742|CDS+3'UTR	Os02g0749200	Conserved hypothetical protein.	1.49372	0.887967	1.28513	7.52567	16.3912
Os02g0755900|mRNA|AK073587|CDS+3'UTR	Os02g0755900	Similar to Glucosyltransferase (Fragment).	1.68821	3.4581	4.47466	5.82475	4.21579
Os02g0755900|mRNA|AK104985|CDS+3'UTR	Os02g0755900	Similar to Glucosyltransferase (Fragment).	1.9189	3.25199	4.67291	5.59019	4.27378
Os02g0756100|mRNA|AK060615|CDS+3'UTR	Os02g0756100	Conserved hypothetical protein.	0.514488	0.528731	0.341425	0.285784	0.293548
Os02g0756200|mRNA|AK063454|CDS+3'UTR	Os02g0756200	Similar to Phi-1 protein.	9.81916	6.76133	3.47349	0.679965	1.52999
Os02g0756200|mRNA|AK101655|CDS+3'UTR	Os02g0756200	Similar to Phi-1 protein.	8.24685	6.71807	3.09467	0.624528	1.36357
Os02g0756600|mRNA|AK062900|CDS+3'UTR	Os02g0756600	Similar to Phi-1 protein.	16.9188	6.37623	2.77501	0.756167	2.49858
Os02g0757900|mRNA|AK061269|CDS+3'UTR	Os02g0757900	Similar to Poly(A)-binding protein II-like.	3.32803	4.80388	2.64316	1.22028	0.951945
Os02g0758000|mRNA|AK064389|CDS+3'UTR	Os02g0758000	Similar to Low molecular weight heat shock protein precursor (Mitochondrial small heat shock protein 22).	179.731	65.9004	38.0195	19.3389	23.2799
Os02g0758000|mRNA|AK074003|CDS+3'UTR	Os02g0758000	Similar to Low molecular weight heat shock protein precursor (Mitochondrial small heat shock protein 22).	13.1942	10.8517	13.3292	10.9187	8.0557
Os02g0758000|mRNA|AK105464|CDS+3'UTR	Os02g0758000	Similar to Low molecular weight heat shock protein precursor (Mitochondrial small heat shock protein 22).	160.733	86.6576	43.5725	22.3517	12.6183
Os02g0758800|mRNA|AK071537|CDS+3'UTR	Os02g0758800	Cupredoxin domain containing protein.	0.202167	0.304278	1.01763	0.737627	1.76212
Os02g0759000|mRNA|AK107898|CDS+3'UTR	Os02g0759000	Conserved hypothetical protein.	0.802622	0.42628	0.230736	0.115731	0.122605
Os02g0760000|COMBINER_EST|AU172669|7	Os02g0760000	Similar to chaperone protein dnaJ.	4.08087	5.27763	4.09372	3.67886	2.76132
Os02g0761600|mRNA|AK120494|CDS+3'UTR	Os02g0761600	Conserved hypothetical protein.	1.15643	0.452512	0.394303	0.300672	0.287913
Os02g0764700|mRNA|AK107146|CDS+3'UTR	Os02g0764700	Similar to Ethylene-responsive transcription factor 4 (Ethylene-responsive element binding factor 4) (Related to APETALA-2 protein 5) (EREBP-4) (AtERF4).	3.33454	2.2585	1.28279	0.318703	0.422275
Os02g0768100|mRNA|AK119344|CDS+3'UTR	Os02g0768100	Hypothetical protein.	0.6757	1.15997	1.81482	3.11566	4.34377
Os02g0768300|mRNA|AK073339|CDS+3'UTR	Os02g0768300	Protein of unknown function DUF6, transmembrane domain containing protein.	0.297841	0.241775	0.536179	0.173266	0.126471
Os02g0769600|COMBINER_EST|Os02g0769600|8			0.331992	0.343168	0.318143	0.31794	0.289305
Os02g0773200|mRNA|AK108499|CDS+3'UTR	Os02g0773200	UspA domain containing protein.	21.3334	23.4669	13.0581	4.10368	2.56822
Os02g0773600|COMBINER_EST|Os02g0773600|8	Os02g0773600	Hypothetical conserved gene.	0.779005	0.826075	0.531287	0.327995	0.289463
Os02g0774100|COMBINER_EST|Os02g0774100|8	Os02g0774100	Similar to thioredoxin-like 5.	0.374614	0.486021	1.05285	11.5514	17.0534
Os02g0774200|mRNA|AK066815|CDS+3'UTR	Os02g0774200	Conserved hypothetical protein.	5.83549	5.78372	2.54595	4.26103	3.15604
Os02g0774800|mRNA|AK072678|CDS+3'UTR	Os02g0774800	Conserved hypothetical protein.	0.516987	0.291909	0.491381	0.12981	0.197911
Os02g0775100|mRNA|AK110750|CDS+3'UTR	Os02g0775100	Similar to Cation diffusion facilitator 8.	6.97617	11.6756	7.45929	8.39821	5.53984
Os02g0779200|mRNA|AK106527|CDS+3'UTR	Os02g0779200	Similar to Subtilisin protease (Fragment).	0.536293	0.484316	0.315015	0.322268	0.289326
Os02g0781400|mRNA|AK060474|CDS+3'UTR	Os02g0781400	Similar to 20 kDa chaperonin, chloroplast precursor (Protein Cpn21) (Chloroplast protein Cpn10) (Chloroplast chaperonin 10) (Ch-CPN10).	0.903185	0.536607	0.503418	0.322742	0.275537
Os02g0782300|mRNA|AK067047|CDS+3'UTR	Os02g0782300	Similar to Heat shock-like protein.	4.28878	4.6987	4.2039	3.12793	2.96467
Os02g0782300|mRNA|AK109297|UTR	Os02g0782300	Hypothetical conserved gene.	21.9252	36.5767	24.7936	10.0862	8.02779
Os02g0782500|mRNA|AK063602|CDS+3'UTR	Os02g0782500	Similar to 17.5 kDa class II heat shock protein.	23.4328	23.5401	22.5196	9.09812	5.09337
Os02g0782500|mRNA|AK119261|CDS+3'UTR	Os02g0782500	Similar to Small heat stress protein class CIII.	16.7723	18.1166	14.7852	8.12631	4.47442
Os02g0783000|mRNA|AK105110|CDS+3'UTR	Os02g0783000	Similar to Pectin methylesterase 5 (Fragment).	0.401853	0.131653	0.204954	0.246901	0.313174
Os02g0786400|COMBINER_EST|Os02g0786400|8	Os02g0786400	Similar to predicted protein.	0.567962	0.419583	0.314217	0.128046	0.18121
Os02g0786500|mRNA|AK107467|CDS+3'UTR	Os02g0786500	Similar to PR-1a pathogenesis related protein (Hv-1a) precursor.	0.551006	0.466756	0.278528	0.244814	0.320968
Os02g0791300|COMBINER|CI543880|0	Os02g0791300	Hypothetical conserved gene.	0.220521	0.476806	0.619503	0.332811	0.437938
Os02g0794600|mRNA|AK108336|CDS+3'UTR	Os02g0794600	Similar to Copper chaperone COX17-1.	1.35732	1.98994	2.73113	3.35432	3.37611
Os02g0796300|mRNA|AK061820|CDS+3'UTR	Os02g0796300	Similar to CCR4-NOT transcription complex subunit 7 (CCR4-associated factor 1) (CAF1) (BTG1 binding factor 1).	3.0123	3.15389	1.99793	1.648	1.33005
Os02g0797400|mRNA|AK073980|CDS+3'UTR	Os02g0797400	MCM family protein.	0.792904	0.121435	0.133608	0.421285	0.355418
Os02g0797400|mRNA|D21289|5'UTR+CDS	Os02g0797400	MCM family protein.	0.97634	0.148828	0.147951	0.300181	0.24756
Os02g0798800|COMBINER_EST|CI553009|6	Os02g0798800	Leucine-rich repeat, cysteine-containing subtype containing protein.	2.90489	3.82858	3.34533	3.70142	3.42183
Os02g0799600|mRNA|AK063712|CDS+3'UTR	Os02g0799600	Conserved hypothetical protein.	2.86426	3.31864	5.18111	2.47574	3.96435
Os02g0802500|mRNA|AK064361|CDS+3'UTR	Os02g0802500	Similar to Proton translocating pyrophosphatase.	1.38869	6.37951	26.5755	11.0058	14.2375
Os02g0802500|mRNA|AK102146|CDS+3'UTR	Os02g0802500	Similar to H(+)-translocating (Pyrophosphate-ENERGIZED) inorganic pyrophosphatase beta-1 polypeptide (EC 3.6.1.1) (Fragment).	1.4176	6.52736	26.6421	11.3442	14.8632
Os02g0803600|mRNA|AK064750|CDS+3'UTR	Os02g0803600	Longin domain containing protein.	0.407925	0.40021	0.485487	0.298429	0.295054
Os02g0804900|COMBINER_EST|CI443811|0	Os02g0804900	Ribonucleotide reductase.	0.778422	0.223929	0.150606	0.249368	0.258705
Os02g0805100|mRNA|AK073365|CDS+3'UTR	Os02g0805100	Similar to Auxin-responsive protein IAA12 (Indoleacetic acid-induced protein 12) (BODENLOS protein).	1.64809	5.81253	13.4744	1.48866	1.65126
Os02g0807200|COMBINER_EST|Os02g0807200|8	Os02g0807200	Protein kinase-like domain containing protein.	3.86755	17.1403	4.4863	1.71039	1.06506
Os02g0810200|mRNA|AK059635|CDS+3'UTR	Os02g0810200	Hypothetical protein.	0.885796	0.106395	0.169958	0.063789	0.203792
Os02g0812400|mRNA|AK119450|CDS+3'UTR	Os02g0812400	Trimeric LpxA-like domain containing protein.	1.67419	1.31055	1.25697	4.05076	3.45286
Os02g0812500|mRNA|AK106918|CDS+3'UTR	Os02g0812500	Cyclin-like F-box domain containing protein.	0.69034	0.829386	0.673679	0.294482	0.292935
Os02g0813800|mRNA|AK063819|UTR	Os02g0813800	Non-protein coding transcript.	4.23506	4.39757	2.58042	1.33969	0.808719
Os02g0813800|mRNA|AK103520|CDS+3'UTR	Os02g0813800	Similar to STYLOSA protein.	3.10263	3.66038	2.39701	1.20629	0.929529
Os02g0814000|mRNA|AK060071|CDS+3'UTR	Os02g0814000	Protein of unknown function DUF862, eukaryotic domain containing protein.	8.63276	3.50355	2.15386	0.689507	0.689003
Os02g0815700|mRNA|AK065514|CDS+3'UTR	Os02g0815700	Similar to C-terminal protease precursor.	0.884198	1.63085	1.00507	0.19245	0.299598
Os02g0816200|mRNA|AK060243|CDS+3'UTR	Os02g0816200	Lipase, GDSL domain containing protein.	0.701537	0.55775	0.432759	0.268262	0.316742
Os02g0816200|mRNA|AK106084|CDS+3'UTR	Os02g0816200	Lipase, GDSL domain containing protein.	0.726351	0.60552	0.440436	0.28472	0.332555
Os02g0816300|mRNA|AK059078|CDS+3'UTR	Os02g0816300	Hypothetical conserved gene.	0.31805	0.323114	0.58065	0.511005	0.683244
Os02g0817700|mRNA|AK061948|CDS+3'UTR	Os02g0817700	Similar to 3-ketoacyl-CoA thiolase (Fragment).	1.08971	2.22023	3.28551	3.05099	2.4379
Os02g0817700|mRNA|AK069768|CDS+3'UTR	Os02g0817700	Similar to 3-ketoacyl-CoA thiolase (Fragment).	1.2546	2.70719	3.83837	3.41785	2.8423
Os02g0824500|mRNA|AK111296|CDS+3'UTR	Os02g0824500	Similar to Remorin.	7.08612	12.8435	10.312	4.79442	1.70918
Os02g0826300|COMBINER|CI447620|0	Os02g0826300	Conserved hypothetical protein.	9.16729	10.9798	2.36681	0.524872	0.506886
Os02g0826300|COMBINER|CI447620|x	Os02g0826300	Conserved hypothetical protein.	8.33622	9.71859	2.27176	0.499523	0.434363
Os02g0827400|COMBINER_EST|Os02g0827400|8	Os02g0827400	Similar to predicted protein.	9.21684	14.7879	5.57512	0.861291	0.788895
Os02g0828500|mRNA|AK105163|CDS+3'UTR	Os02g0828500	Tetratricopeptide-like helical domain containing protein.	0.237327	0.302856	0.194969	0.35923	0.2586
Os02g0829100|mRNA|AB037145|CDS+3'UTR	Os02g0829100	Replication protein A 30kDa.	1.05647	0.299537	0.231059	0.391303	0.406467
Os02g0829100|mRNA|AK103235|CDS+3'UTR	Os02g0829100	Replication protein A 30kDa.	1.06856	0.307953	0.242679	0.409631	0.436862
Os02g0833600|mRNA|AK061086|CDS+3'UTR	Os02g0833600	Similar to Basic leucine zipper transcription factor (Fragment).	6.40432	6.53326	4.8659	2.55994	2.58796
Os02g0834300|mRNA|AK119712|CDS+3'UTR	Os02g0834300	Beta tubulin, autoregulation binding site domain containing protein.	0.620165	0.565174	0.420348	0.299862	0.308053
Os03g0100100|COMBINER|CI224620|6	Os03g0100100	Pectinesterase inhibitor domain containing protein.	3.38969	3.01763	2.70858	1.44398	0.937771
Os03g0100200|mRNA|AK072547|CDS+3'UTR	Os03g0100200	Transcriptional coactivator/pterin dehydratase family protein.	21.4127	12.5691	6.92499	1.65499	0.712189
Os03g0100200|mRNA|AK104982|CDS+3'UTR	Os03g0100200	Transcriptional coactivator/pterin dehydratase family protein.	20.0855	11.8781	6.32765	1.70055	0.694141
Os03g0100200|mRNA|AK107110|CDS+3'UTR	Os03g0100100	Pectinesterase inhibitor domain containing protein.	7.11252	6.02982	4.21005	3.23464	3.19561
Os03g0102500|mRNA|AF261276|CDS+3'UTR	Os03g0102500	Similar to Beta-expansin precursor (Fragment).	0.214875	0.23564	0.533938	0.469028	0.554418
Os03g0102500|mRNA|AK070972|CDS+3'UTR	Os03g0102500	Similar to Beta-expansin precursor (Fragment).	0.231206	0.233661	0.524541	0.416342	0.481216
Os03g0102700|mRNA|AF261275|CDS+3'UTR	Os03g0102700	Similar to Expansin-B7.	0.20192	0.298838	0.457386	0.307296	0.38682
Os03g0102700|mRNA|AK061423|CDS+3'UTR	Os03g0102700	Similar to Expansin-B7.	0.193874	0.257034	0.424934	0.364385	0.40321
Os03g0105500|COMBINER_EST|Os03g0105500|8	Os03g0105500	Conserved hypothetical protein.	1.3679	1.77052	2.3632	4.36913	4.76195
Os03g0105600|COMBINER_EST|CI390494|0	Os03g0105600	Tubulin beta-1 chain (Beta-1 tubulin).	0.65833	0.301135	0.251954	0.291141	0.366766
Os03g0108300|mRNA|AK061126|CDS+3'UTR	Os03g0108300	Similar to Cellulase (EC 3.2.1.4).	0.168385	0.216943	0.326291	0.343361	0.540525
Os03g0108300|mRNA|AK104060|CDS+3'UTR	Os03g0108300	Similar to Cellulase (EC 3.2.1.4).	0.16744	0.218525	0.31457	0.363677	0.527024
Os03g0108300|mRNA|AK119538|CDS+3'UTR	Os03g0108300	Similar to xyloglucan endotransglucosylase/hydrolase protein 32.	0.15122	0.213857	0.32144	0.330192	0.517035
Os03g0110900|mRNA|AK070403|CDS+3'UTR	Os03g0110900	Conserved hypothetical protein.	0.637434	1.39707	2.13042	6.98498	4.58918
Os03g0112900|COMBINER_EST|Os03g0112900|8	Os03g0112900	Similar to Aldehyde 5-hydroxylase.	0.74793	0.385548	0.472376	0.324267	0.323577
Os03g0113700|mRNA|AK103835|CDS+3'UTR	Os03g0113700	Similar to Heat shock 70 kDa protein, mitochondrial precursor.	6.79424	6.98011	5.00326	3.97301	2.63376
Os03g0114000|mRNA|AK063381|CDS+3'UTR	Os03g0114000	Similar to Kinesin.	0.918462	0.285989	0.332785	0.23405	0.297505
Os03g0114100|mRNA|AK108265|CDS+3'UTR	Os03g0114100	Conserved hypothetical protein.	4.40076	3.5728	5.3179	1.53544	1.21472
Os03g0118200|mRNA|AK060919|CDS+3'UTR	Os03g0118200	UAA transporter family protein.	0.43617	0.507501	1.6489	3.25668	5.79799
Os03g0118700|COMBINER|CI277624|6	Os03g0118700	Similar to predicted protein.	0.0444289	0.0568926	6.85508	8.78203	15.4264
Os03g0120500|COMBINER_EST|Os03g0120500|8			1.51146	1.09952	1.49348	8.40056	16.0108
Os03g0120600|mRNA|AK121692|CDS+3'UTR			0.673894	5.88581	49.0055	4.43368	11.1322
Os03g0121300|mRNA|AK064633|CDS+3'UTR	Os03g0121300	Similar to Peroxidase 1.	1.21057	2.10152	2.08676	4.01576	4.20089
Os03g0121300|mRNA|AK120047|CDS+3'UTR	Os03g0121300	Similar to Peroxidase 5.	1.16338	2.03443	2.23818	3.93354	4.28453
Os03g0123100|mRNA|AK062161|CDS+3'UTR	Os03g0123100	Similar to SUMO E2 conjugating enzyme SCE1.	1.06544	0.513832	0.342445	0.307494	0.141413
Os03g0123800|mRNA|AK061176|CDS+3'UTR	Os03g0123800	Conserved hypothetical protein.	3.65726	3.35485	1.28513	0.963642	0.57267
Os03g0123800|mRNA|AK069496|CDS+3'UTR	Os03g0123800	Conserved hypothetical protein.	4.43945	4.28614	1.54809	1.04155	0.526468
Os03g0124800|mRNA|AK121064|UTR	Os03g0124800	Non-protein coding transcript.	3.00876	5.89789	6.8351	2.15709	1.34924
Os03g0127500|COMBINER_EST|C98212|6	Os03g0127500	bZIP transcription factor, bZIP-1 domain containing protein.	1.42267	1.11803	0.564857	0.309409	0.215369
Os03g0128100|mRNA|AK062279|CDS+3'UTR	Os03g0128100	Similar to Callose synthase 1 catalytic subunit.	3.19212	4.55746	2.72102	2.1232	2.69413
Os03g0128200|COMBINER_EST|Os03g0128200|8	Os03g0128200	Similar to predicted protein.	6.69088	10.9166	4.48629	5.34755	4.47222
Os03g0128300|mRNA|AK064718|CDS+3'UTR	Os03g0128300	Conserved hypothetical protein.	1.04046	0.24961	0.271521	0.121319	0.265362
Os03g0129400|mRNA|AK063857|CDS+3'UTR	Os03g0129400	Hypothetical protein.	0.0659819	0.0838626	0.311176	0.959032	2.63493
Os03g0129400|mRNA|AK073820|CDS+3'UTR	Os03g0129400	Similar to EST AU078206(E20111) corresponds to a region of the predicted gene.	0.0517401	0.0602937	0.233428	0.794106	2.06185
Os03g0129400|mRNA|AK099390|CDS+3'UTR	Os03g0129400	Similar to EST AU078206(E20111) corresponds to a region of the predicted gene.	0.0586429	0.0593242	0.230962	0.776711	2.06963
Os03g0132800|mRNA|AK122069|CDS+3'UTR	Os03g0132800	Similar to protein kinase-like protein [Oryza sativa (japonica cultivar-group)].	1.7494	1.87412	1.89655	3.20649	3.37969
Os03g0132900|mRNA|AF001501|CDS+3'UTR	Os03g0132900	Similar to Chitinase (EC 3.2.1.14) (Fragment).	0.523936	2.34633	4.05407	5.85896	4.32528
Os03g0132900|mRNA|AK059871|CDS+3'UTR	Os03g0132900	Similar to Chitinase (EC 3.2.1.14) (Fragment).	0.690205	1.90945	3.14795	3.75303	3.1364
Os03g0132900|mRNA|AK099355|CDS+3'UTR	Os03g0132900	Similar to Chitinase (EC 3.2.1.14) (Fragment).	1.24756	2.31474	5.52471	4.56897	3.60756
Os03g0133000|mRNA|AK107090|CDS+3'UTR	Os03g0133000	Similar to NAC-domain protein 14.	3.79999	3.0429	1.15962	0.828752	0.672197
Os03g0133100|mRNA|AK063608|CDS+3'UTR	Os03g0133100	Hypothetical protein.	96.1088	176.314	93.4392	4.43086	3.04359
Os03g0133100|mRNA|AK119680|CDS+3'UTR	Os03g0133100	Hypothetical protein.	84.2034	160.446	81.2635	3.90426	2.60066
Os03g0133300|mRNA|AK064510|CDS+3'UTR	Os03g0133300	Conserved hypothetical protein.	1.05444	1.24608	0.729724	0.155734	0.130759
Os03g0133500|mRNA|AK066406|CDS+3'UTR	Os03g0133500	Similar to Adenosine monophosphate binding protein 1 AMPBP1.	0.236105	0.248261	1.69298	1.85465	3.30699
Os03g0135200|mRNA|AK059226|CDS+3'UTR	Os03g0135200	Similar to Glutathione S-transferase GST 9 (EC 2.5.1.18).	1.1563	0.706952	0.493156	0.171926	0.251933
Os03g0135700|mRNA|AK103779|CDS+3'UTR	Os03g0135700	Transcriptional activator Rb homolog (Fragment).	0.816878	0.517936	0.416788	0.174819	0.215035
Os03g0138200|mRNA|AK105857|CDS+3'UTR	Os03g0138200	Cytochrome P450 family protein.	0.0856049	0.108897	0.416911	0.502368	0.891343
Os03g0138500|mRNA|AK102410|CDS+3'UTR	Os03g0138500	Conserved hypothetical protein.	1.29439	0.291798	0.274722	0.149461	0.313454
Os03g0138700|mRNA|AK072119|CDS+3'UTR	Os03g0138700	TGF-beta receptor, type I/II extracellular region family protein.	0.161197	0.241502	0.520815	0.733006	0.962641
Os03g0139000|mRNA|AK060973|CDS+3'UTR	Os03g0138900	Conserved hypothetical protein.	1.47953	1.26204	1.46814	9.88706	23.0408
Os03g0139000|mRNA|AK103850|CDS+3'UTR	Os03g0138900	Conserved hypothetical protein.	1.20575	1.04797	1.74183	9.77729	21.9598
Os03g0140100|mRNA|AK067844|CDS+3'UTR	Os03g0140100	Similar to Cytochrome P450 family protein.	0.0956191	0.198641	0.278374	0.363659	0.392781
Os03g0140100|mRNA|AK119195|CDS+3'UTR	Os03g0140100	Cytochrome P450 family protein.	0.103441	0.200598	0.299923	0.374239	0.404223
Os03g0140200|mRNA|AK061292|CDS+3'UTR	Os03g0140200	Similar to Cytochrome P450 86A1 (EC 1.14.-.-) (CYPLXXXVI) (P450-dependent fatty acid omega-hydroxylase).	0.184808	0.155529	0.45469	0.625874	1.38578
Os03g0140400|COMBINER_EST|Os03g0140400|8	Os03g0140400	Conserved hypothetical protein.	0.153049	0.219915	0.396982	0.318385	0.523607
Os03g0141200|mRNA|AK068968|CDS+3'UTR	Os03g0141200	Similar to Beta-amylase PCT-BMYI (EC 3.2.1.2).	15.3197	13.4352	11.1131	2.3092	1.43218
Os03g0141200|mRNA|AK100092|CDS+3'UTR	Os03g0141200	Similar to Beta-amylase PCT-BMYI (EC 3.2.1.2).	15.2286	13.1647	11.4573	2.41473	1.46812
Os03g0142200|COMBINER_EST|Os03g0142200|8	Os03g0142200	Protein of unknown function DUF594 family protein.	2.6615	5.13006	3.45794	0.615774	0.541041
Os03g0142900|mRNA|AK067103|CDS+3'UTR	Os03g0142900	Protein of unknown function DUF946, plant family protein.	1.34501	2.59497	3.45308	8.22375	5.41439
Os03g0142900|mRNA|AK120438|CDS+3'UTR	Os03g0142900	Protein of unknown function DUF946, plant family protein.	1.48565	2.69434	3.34096	7.47696	4.62076
Os03g0143200|mRNA|AK062932|UTR	Os03g0143200	Non-protein coding transcript.	0.434759	0.240764	0.197332	0.29218	0.393607
Os03g0143400|mRNA|AK073999|CDS+3'UTR	Os03g0143400	Similar to mitochondrial chaperonin-60 [Oryza sativa (japonica cultivar-group)].	16.633	9.25853	3.96991	2.08905	0.833738
Os03g0156600|mRNA|AK105367|CDS+3'UTR	Os03g0156600	Similar to Farnesylated protein (ATFP6).	206.164	300.764	85.1852	14.8809	6.09095
Os03g0158200|COMBINER_EST|CI372776|0	Os03g0158200	DEAD-like helicase, N-terminal domain containing protein.	3.03944	3.0211	2.07258	1.79638	1.34994
Os03g0161900|mRNA|AK066844|CDS+3'UTR	Os03g0161900	Similar to Isoform 2 of Heat stress transcription factor A-2d.	13.3492	3.63089	2.43593	1.12673	0.70573
Os03g0161900|mRNA|AY344489|CDS+3'UTR	Os03g0161900	Similar to Isoform 2 of Heat stress transcription factor A-2d.	12.3405	3.94189	2.61141	1.16999	0.717112
Os03g0162200|mRNA|AK061605|CDS+3'UTR	Os03g0162200	Similar to Histone H2A.	1.06265	0.487312	0.361783	0.266322	0.212117
Os03g0162800|mRNA|AK064127|CDS+3'UTR	Os03g0162800	Similar to Beta-ketoacyl-CoA-synthase.	0.3238	0.317386	0.340564	0.30753	0.36561
Os03g0165900|mRNA|AK063721|CDS+3'UTR	Os03g0165900	Similar to pollenless3.	0.690136	1.55363	1.17695	0.284945	0.325135
Os03g0166200|COMBINER_EST|CI453100|2	Os03g0166200	Similar to Prolyl 4-hydroxylase.	2.57197	4.4604	4.09533	8.87998	6.41284
Os03g0167600|mRNA|AK121254|CDS+3'UTR	Os03g0167600	Similar to Male sterility protein 2.	0.134416	0.0921893	1.89415	3.31513	6.78057
Os03g0168100|mRNA|AK121575|CDS+3'UTR	Os03g0168100	Late embryogenesis abundant protein repeat containing protein.	119.302	520.029	320.528	97.071	19.2719
Os03g0168300|mRNA|AK069941|CDS+3'UTR	Os03g0168300	Conserved hypothetical protein.	0.900902	0.157192	1.40981	3.00206	3.68566
Os03g0168600|COMBINER_EST|CI490016|5	Os03g0168600	Anther cutin biosynthesis and pollen exine formation.;Cytochrome P450 protein.	0.38558	0.299095	1.74278	2.27709	3.12991
Os03g0168700|COMBINER_EST|Os03g0168700|8	Os03g0168700	SET domain containing protein.	0.727881	0.256205	0.386616	0.21748	0.346101
Os03g0172100|mRNA|AK121297|CDS+3'UTR	Os03g0172100	Hypothetical protein.	6.41156	3.36781	70.9292	1.22293	1.48088
Os03g0172100|mRNA|U25284|CDS+3'UTR	Os03g0172100	Hypothetical protein.	6.04256	3.18281	62.8117	1.01401	1.27348
Os03g0174200|mRNA|AK060616|CDS+3'UTR	Os03g0174200	Conserved hypothetical protein.	0.98755	0.241808	0.35297	0.13524	0.264184
Os03g0174200|mRNA|AK103762|CDS+3'UTR	Os03g0174200	Conserved hypothetical protein.	1.28074	0.261848	0.328721	0.107445	0.243538
Os03g0174700|mRNA|AK069179|CDS+3'UTR	Os03g0174800	Similar to predicted protein.	6.374	5.34057	3.49675	3.42841	4.69102
Os03g0174800|COMBINER_EST|CI280059|6	Os03g0174800	Similar to predicted protein.	5.86834	6.43192	4.24113	1.37749	1.44973
Os03g0174900|mRNA|AK069348|CDS+3'UTR	Os03g0174900	Similar to RAPB protein.	4.54912	6.59124	5.40131	3.28346	2.84319
Os03g0174900|mRNA|Y10905|CDS+3'UTR	Os03g0174900	Similar to RAPB protein.	3.32363	4.36623	4.12135	2.47562	2.01731
Os03g0176600|COMBINER_EST|CI009945|6			1.09955	1.57751	1.34963	0.138988	0.0712636
Os03g0176700|COMBINER_EST|Os03g0176700|8	Os03g0176700	Hypothetical conserved gene.	1.04699	1.69316	1.38423	0.142033	0.0674288
Os03g0180100|mRNA|AK108326|CDS+3'UTR	Os03g0180100	Protein of unknown function DUF1677, plant family protein.	3.89558	4.37691	2.53228	1.19905	1.39847
Os03g0180300|mRNA|AK060766|CDS+3'UTR	Os03g0180300	Hypothetical conserved gene.	4.16554	3.71757	1.95218	1.24636	0.974047
Os03g0180300|mRNA|AK061621|CDS+3'UTR	Os03g0180300	Hypothetical conserved gene.	4.19395	3.97906	2.21509	1.27136	0.932113
Os03g0180300|mRNA|AK068487|CDS+3'UTR	Os03g0180300	Smr protein/MutS2 C-terminal domain containing protein.	4.70818	4.0889	2.29671	1.39191	1.06218
Os03g0180300|mRNA|AK070967|CDS+3'UTR	Os03g0180300	Smr protein/MutS2 C-terminal domain containing protein.	4.36813	3.86782	2.01723	1.33771	1.01702
Os03g0182800|mRNA|AJ304840|CDS+3'UTR	Os03g0182800	Similar to Ethylene responsive element binding factor3 (OsERF3).	8.04686	2.42067	13.1382	4.84843	5.09385
Os03g0183000|mRNA|AK060929|CDS+3'UTR	Os03g0183000	Hypothetical conserved gene.	0.780529	0.758723	2.39844	5.93519	7.93777
Os03g0183000|mRNA|AK101949|CDS+3'UTR	Os03g0183000	Similar to AP2 domain containing protein RAP2.6 (Fragment).	0.720412	0.735193	2.28296	5.48645	7.57972
Os03g0183200|mRNA|AK106987|CDS+3'UTR	Os03g0183200	Conserved hypothetical protein.	0.310913	0.209008	0.517211	0.29843	0.441792
Os03g0184100|mRNA|AK067400|CDS+3'UTR	Os03g0184100	Hypothetical protein.	0.587689	0.256352	0.508385	10.3841	14.2395
Os03g0184500|mRNA|AK122017|CDS+3'UTR	Os03g0184500	Transcriptional factor B3 family protein.	7.84322	11.777	2.75433	2.09898	1.75663
Os03g0186900|mRNA|AK062232|CDS+3'UTR	Os03g0186900	Radc1.	0.180522	0.209375	0.487224	0.570259	0.676372
Os03g0186900|mRNA|AK120050|CDS+3'UTR	Os03g0186900	Radc1.	0.276637	0.23751	0.571976	0.637797	0.854742
Os03g0188100|COMBINER_EST|CI477332|6	Os03g0188100	Similar to transparent testa 12 protein.	4.46342	5.85145	3.65947	0.892911	1.05177
Os03g0188200|mRNA|AK058578|CDS+3'UTR	Os03g0188200	Zinc finger, RING/FYVE/PHD-type domain containing protein.	3.82862	3.52603	1.742	0.991681	0.844473
Os03g0188400|mRNA|AK107555|CDS+3'UTR	Os03g0188400	Helix-loop-helix DNA-binding domain containing protein.	1.23645	2.22989	2.53535	0.232478	0.166952
Os03g0189400|mRNA|AK067720|CDS+3'UTR	Os03g0189400	Similar to Alcohol dehydrogenase ADH.	0.859394	0.329274	0.213869	0.141378	0.181903
Os03g0190300|COMBINER_EST|CI442602|1	Os03g0190300	Similar to Protein binding protein.	0.300942	0.408853	0.480098	0.325578	0.489289
Os03g0192100|mRNA|AK064747|CDS+3'UTR	Os03g0192100	Similar to Serine carboxypeptidase family protein, expressed.	1.18906	4.06857	3.2731	2.85012	2.25755
Os03g0205800|COMBINER_EST|Os03g0205800|8	Os03g0205800	Similar to Acetyltransferase, GNAT family protein, expressed.	1.09499	2.24758	3.26719	2.29467	3.11697
Os03g0208900|mRNA|AK070806|CDS+3'UTR	Os03g0208900	Similar to ADP-glucose pyrophosphorylase (Fragment).	0.794365	0.443837	0.307161	0.248756	0.262936
Os03g0209700|COMBINER_EST|Os03g0209700|8	Os03g0209700	Hypothetical conserved gene.	6.36539	15.4196	12.606	11.694	6.8742
Os03g0209800|mRNA|AK100680|CDS+3'UTR	Os03g0209800	RhoGAP domain containing protein.	1.15771	0.768463	0.445956	0.271233	0.283013
Os03g0210600|mRNA|AK070125|CDS+3'UTR	Os03g0210600	Conserved hypothetical protein.	2.02899	2.7099	2.87677	3.21155	3.59339
Os03g0212000|COMBINER|CI259001|6	Os03g0212000	Hypothetical conserved gene.	0.121639	0.127386	15.916	7.47442	19.4265
Os03g0212600|mRNA|AK064500|CDS+3'UTR	Os03g0212600	Targeting for Xklp2 family protein.	0.653136	0.219264	0.31531	0.0918571	0.187087
Os03g0213100|mRNA|AK073633|CDS+3'UTR	Os03g0213100	Similar to Sec61p.	3.46933	3.52457	1.76524	1.09252	0.915163
Os03g0214100|mRNA|AB111916|CDS+3'UTR	Os03g0214100	Replication protein A1.	1.08337	0.476473	0.282626	0.329309	0.276661
Os03g0214100|mRNA|AK060582|CDS+3'UTR	Os03g0214100	Replication protein A1.	1.05788	0.461938	0.27426	0.359244	0.30918
Os03g0215200|mRNA|AB106553|CDS+3'UTR	Os03g0215200	Drooping leaf protein.	0.667701	0.216312	0.294168	0.17573	0.266119
Os03g0215200|mRNA|AY494713|CDS+3'UTR	Os03g0215200	Drooping leaf protein.	1.28064	1.03396	1.53407	5.48944	7.51197
Os03g0216800|mRNA|AK105520|CDS+3'UTR	Os03g0216800	Similar to Polygalacturonase B (Fragment).	0.311154	0.303968	0.712623	0.795965	0.567453
Os03g0218400|mRNA|AK099306|CDS+3'UTR	Os03g0218400	Similar to Hexose transporter.	0.211081	0.300776	0.450454	1.10219	0.629858
Os03g0218500|mRNA|AK102685|CDS+3'UTR	Os03g0218500	Similar to 70kD heat shock protein.	15.3566	17.3543	10.864	6.71114	3.95823
Os03g0221500|mRNA|AK103138|CDS+3'UTR	Os03g0221500	Glycoside hydrolase, family 17 protein.	1.00541	0.521196	0.290648	0.211596	0.267087
Os03g0221500|mRNA|AK109516|CDS+3'UTR	Os03g0221500	Glycoside hydrolase, family 17 protein.	1.02085	0.484194	0.286621	0.177221	0.222533
Os03g0221500|mRNA|AK119620|CDS+3'UTR	Os03g0221500	Glycoside hydrolase, family 17 protein.	1.09123	0.525128	0.301608	0.214711	0.271922
Os03g0221500|mRNA|AY217745|CDS	Os03g0221500	Glycoside hydrolase, family 17 protein.	0.996674	0.437606	0.296696	0.168949	0.223506
Os03g0221600|mRNA|AK067131|CDS+3'UTR	Os03g0221600	Conserved hypothetical protein.	0.809737	1.76071	3.63561	4.05864	3.01634
Os03g0221700|mRNA|AK060765|CDS+3'UTR	Os03g0221700	Serine/threonine protein kinase-related domain containing protein.	0.227667	0.30768	0.477593	0.798292	0.93339
Os03g0221700|mRNA|AK098866|CDS+3'UTR	Os03g0221700	Serine/threonine protein kinase-related domain containing protein.	0.169199	0.29188	0.55903	0.572669	0.729488
Os03g0221700|mRNA|AK098871|CDS+3'UTR	Os03g0221700	Serine/threonine protein kinase-related domain containing protein.	0.171169	0.304872	0.589288	0.625344	0.78062
Os03g0223100|mRNA|AK105985|CDS+3'UTR	Os03g0223100	Similar to Cytochrome P450 CYP94D27.	0.230011	0.293098	0.325319	0.262157	0.403274
Os03g0223100|mRNA|AK109504|CDS+3'UTR	Os03g0223100	Cytochrome P450 family protein.	0.323243	0.500307	0.266912	0.26555	0.642896
Os03g0223400|mRNA|X14244|CDS+3'UTR	Os03g0223400	Glutamine synthetase root isozyme (EC 6.3.1.2) (Glutamate--ammonia ligase) (Clone lambda-GS8).	0.797563	0.429177	0.353853	0.227737	0.206975
Os03g0223700|mRNA|AK068416|CDS+3'UTR	Os03g0223700	Armadillo-like helical domain containing protein.	0.779807	0.470391	0.305895	0.285286	0.290917
Os03g0224700|mRNA|AJ575240|5'UTR+CDS	Os03g0224700	Similar to HSP protein (Fragment).	5.77046	7.53237	4.99888	2.59996	1.98287
Os03g0224700|mRNA|AK072571|CDS+3'UTR	Os03g0224700	Similar to HSP protein (Fragment).	3.87568	3.60952	2.30481	2.01314	1.52773
Os03g0224700|mRNA|AY344490|CDS+3'UTR	Os03g0224700	Similar to HSP protein (Fragment).	29.6471	48.4976	25.8326	8.95081	6.48981
Os03g0225200|mRNA|AK074008|CDS+3'UTR	Os03g0225200	Cyclin, A/B/D/E domain containing protein.	4.019	4.98732	3.4564	5.46565	4.1044
Os03g0226200|mRNA|AK121522|CDS+3'UTR	Os03g0226200	Non-symbiotic hemoglobin 2 (rHb2) (ORYsa GLB1b).	1.80037	20.1748	778.954	10.9816	74.8777
Os03g0226200|mRNA|U76031|CDS+3'UTR	Os03g0226200	Non-symbiotic hemoglobin 2 (rHb2) (ORYsa GLB1b).	2.29827	9.49745	302.106	4.47582	29.7415
Os03g0226600|mRNA|AK121288|CDS+3'UTR	Os03g0226600	Similar to cDNA clone:J023007A11, full insert sequence.	4.46792	5.24423	3.74448	3.41991	1.82782
Os03g0227800|mRNA|AK063571|CDS+3'UTR	Os03g0227800	Hypothetical conserved gene.	1.202	1.7116	2.08696	3.08223	3.10795
Os03g0230300|mRNA|AK058934|UTR	Os03g0230300	Non-protein coding transcript.	12.9703	7.23155	6.73006	2.67292	2.93028
Os03g0230300|mRNA|AK102303|CDS+3'UTR	Os03g0230300	Poly(ADP-ribose) polymerase, catalytic region domain containing protein.	10.811	6.17038	5.93498	2.12785	2.90324
Os03g0231600|mRNA|AK105963|CDS+3'UTR	Os03g0231600	Similar to Branched-chain-amino-acid aminotransferase 3, chloroplast precursor (EC 2.6.1.42) (Atbcat-3).	2.22864	2.59427	3.83055	3.32851	1.30956
Os03g0234900|mRNA|AK104936|CDS+3'UTR	Os03g0234900	Similar to Peroxidase (EC 1.11.1.7).	0.322855	0.261449	0.366752	0.586979	0.713158
Os03g0237500|mRNA|AK058844|CDS+3'UTR	Os03g0237500	Similar to predicted protein.	19.0956	7.82221	4.03773	1.30955	1.06914
Os03g0237500|mRNA|AK068960|CDS+3'UTR	Os03g0237500	Protein of unknown function DUF775 family protein.	20.2194	10.1895	4.96908	2.02481	1.56903
Os03g0237600|mRNA|AK067660|CDS+3'UTR	Os03g0237600	MAP65/ASE1 family protein.	5.40852	3.65987	2.6896	1.34504	1.08156
Os03g0240600|mRNA|AK109161|CDS+3'UTR	Os03g0240600	Zinc finger, RING/FYVE/PHD-type domain containing protein.	7.47896	12.1117	1.07663	0.625627	0.897197
Os03g0241900|mRNA|AK098994|CDS+3'UTR	Os03g0241900	Similar to Senescence-associated protein 12.	4.75699	4.73743	2.11615	1.51583	1.32097
Os03g0241900|mRNA|AK104874|CDS+3'UTR	Os03g0241900	Similar to Senescence-associated protein, expressed.	5.06523	4.7211	2.08654	1.481	1.33145
Os03g0241900|mRNA|AK111568|CDS+3'UTR	Os03g0241900	Similar to Senescence-associated protein 12.	5.02786	4.59009	2.1102	1.59486	1.32968
Os03g0244200|mRNA|AK101837|CDS+3'UTR	Os03g0244200	Similar to Thaumatin-like protein.	1.21019	1.37055	1.71762	3.43197	3.61236
Os03g0244200|mRNA|AK105771|CDS+3'UTR	Os03g0244200	Similar to Thaumatin-like protein.	1.2703	1.44575	1.77338	3.30403	3.53482
Os03g0245100|mRNA|AK069529|CDS+3'UTR	Os03g0245100	NAD(P)-binding domain containing protein.	1.48887	11.5416	12.6241	20.6802	9.14752
Os03g0245200|mRNA|AK062288|CDS+3'UTR	Os03g0245200	Protein of unknown function DUF1210 family protein.	0.725911	0.55414	0.452115	0.127764	0.192939
Os03g0245500|mRNA|AK064707|CDS+3'UTR	Os03g0245500	Curculin-like (mannose-binding) lectin domain containing protein.	1.19739	0.829473	1.30803	3.73157	3.35347
Os03g0245800|mRNA|AB020973|CDS+3'UTR	Os03g0245800	Similar to Heat shock protein 26.	18.9251	25.1403	22.2136	9.32372	4.6612
Os03g0245800|mRNA|AK063618|CDS+3'UTR	Os03g0245800	Similar to Heat shock protein 26.	33.0543	32.0598	23.6737	10.1293	4.85895
Os03g0245800|mRNA|AK120045|CDS+3'UTR	Os03g0245800	Similar to Heat shock protein 26.	23.0524	21.1011	20.8936	9.23226	4.51179
Os03g0245800|mRNA|AK120048|CDS+3'UTR	Os03g0245800	Similar to Heat shock protein 26.	30.2556	27.9596	23.5453	9.93235	4.74319
Os03g0256500|COMBINER_EST|Os03g0256500|8			1.51841	1.1223	1.76847	11.9303	22.5428
Os03g0259400|COMBINER_EST|Os03g0259400|8	Os03g0259400	Similar to Leucoanthocyanidin reductase (EC 1.17.1.3) (Leucocyanidin reductase).	0.944878	0.313843	0.152905	0.108657	0.121089
Os03g0261000|COMBINER|CI250750|6			1.69756	1.89841	2.52664	5.02218	4.80238
Os03g0263700|mRNA|AK071748|CDS+3'UTR	Os03g0263700	Conserved hypothetical protein.	5.22371	4.66881	2.48392	1.16006	1.02488
Os03g0264800|COMBINER_EST|Os03g0264800|8	Os03g0264800	Similar to ATPase, AAA family protein, expressed.	1.66334	0.521545	0.253354	0.358277	0.305495
Os03g0265600|mRNA|AK065578|CDS+3'UTR	Os03g0265600	Similar to Transformer-2-like protein.	6.82984	8.00121	8.21465	7.93139	5.65957
Os03g0265900|mRNA|AK099963|CDS+3'UTR	Os03g0265900	Conserved hypothetical protein.	0.503516	0.506518	1.98959	18.0135	17.5259
Os03g0265900|mRNA|AK120374|CDS+3'UTR	Os03g0265900	Conserved hypothetical protein.	0.470347	0.497677	2.14625	18.495	17.5831
Os03g0266300|mRNA|AB110191|CDS+3'UTR	Os03g0266300	Class I low-molecular-weight heat shock protein 17.9.	3.08033	3.19945	3.33153	3.32856	2.98148
Os03g0266300|mRNA|AF467729|CDS+3'UTR	Os03g0266300	Class I low-molecular-weight heat shock protein 17.9.	3.4818	3.68403	3.81669	3.92355	3.37267
Os03g0266300|mRNA|AK073671|CDS+3'UTR	Os03g0266300	Class I low-molecular-weight heat shock protein 17.9.	3.29275	3.14014	3.30544	3.53367	3.02368
Os03g0266300|mRNA|AK104129|CDS+3'UTR	Os03g0266300	Class I low-molecular-weight heat shock protein 17.9.	27.4801	42.9466	31.3118	32.2605	12.9588
Os03g0266300|mRNA|AK119239|CDS+3'UTR	Os03g0266300	Class I low-molecular-weight heat shock protein 17.9.	3.62369	3.48598	3.44374	3.55483	3.27314
Os03g0266300|mRNA|AK119616|CDS+3'UTR	Os03g0266300	Class I low-molecular-weight heat shock protein 17.9.	3.55947	3.19906	3.38883	3.43594	3.11677
Os03g0266300|mRNA|AK119664|CDS+3'UTR	Os03g0266300	Class I low-molecular-weight heat shock protein 17.9.	3.10492	3.4494	3.29005	3.29008	3.08413
Os03g0266300|mRNA|AK119675|CDS+3'UTR	Os03g0266300	Class I low-molecular-weight heat shock protein 17.9.	3.16696	3.25618	3.39886	3.45882	3.07094
Os03g0266300|mRNA|D21285|5'UTR+CDS	Os03g0266300	Class I low-molecular-weight heat shock protein 17.9.	49.2379	53.7318	42.2099	19.5996	6.71862
Os03g0266900|mRNA|AK119243|CDS+3'UTR	Os03g0266900	Low molecular mass heat shock protein Oshsp17.3.	25.8052	23.3736	18.4398	7.55988	3.79876
Os03g0266900|mRNA|AK119717|CDS+3'UTR	Os03g0266900	Low molecular mass heat shock protein Oshsp17.3.	23.3393	22.1564	15.7776	7.33468	3.94157
Os03g0266900|mRNA|D12635|CDS+3'UTR	Os03g0266900	Low molecular mass heat shock protein Oshsp17.3.	22.7005	21.8575	15.0723	7.02674	3.80258
Os03g0266900|mRNA|M80186|CDS+3'UTR	Os03g0266900	Low molecular mass heat shock protein Oshsp17.3.	18.5505	18.7268	14.6964	6.93993	3.62839
Os03g0267000|mRNA|X75616|CDS+3'UTR	Os03g0267000	Low molecular mass heat shock protein Oshsp18.0.	21.5983	22.2634	19.1553	7.72828	3.96036
Os03g0267200|mRNA|AK069547|CDS+3'UTR	Os03g0267200	Low molecular mass heat shock protein Oshsp17.7.	8.519	8.35631	7.61776	3.16016	1.46687
Os03g0271400|mRNA|AK066433|CDS+3'UTR	Os03g0271400	Armadillo-like helical domain containing protein.	7.61208	4.79273	4.58669	4.63886	4.30746
Os03g0272300|mRNA|AK071865|CDS+3'UTR	Os03g0272300	Zinc finger, RING/FYVE/PHD-type domain containing protein.	7.82329	5.83029	3.50829	1.61196	1.43622
Os03g0273200|mRNA|AK060579|CDS+3'UTR	Os03g0273200	Similar to Laccase (EC 1.10.3.2).	0.143156	0.0821165	0.141609	0.203306	0.370519
Os03g0273800|mRNA|AK100173|CDS+3'UTR	Os03g0273800	HAD-superfamily hydrolase, subfamily IA, variant 3 domain containing protein.	5.53436	3.70996	2.51851	1.72785	1.77541
Os03g0276500|mRNA|AK072830|CDS+3'UTR	Os03g0276500	Similar to Heat shock protein 70.	8.65953	3.82604	1.6997	1.11301	0.935182
Os03g0276500|mRNA|AK099275|CDS+3'UTR	Os03g0276500	Similar to Heat shock protein 70.	10.9793	3.62533	1.40354	1.18611	0.933015
Os03g0276500|mRNA|AK109474|CDS+3'UTR	Os03g0276500	Similar to Heat shock protein 70.	8.46671	4.227	1.3482	1.18319	0.996962
Os03g0276700|mRNA|AK063885|CDS+3'UTR	Os03g0276700	Conserved hypothetical protein.	2.44051	3.09664	3.12353	3.00151	2.21913
Os03g0277300|COMBINER_EST|CI066180|3	Os03g0277300	Heat shock protein 70.	89.6042	110.352	66.6968	23.3086	12.6297
Os03g0277600|mRNA|AK061425|CDS+3'UTR	Os03g0277600	Similar to (clone wusl1032) mRNA sequence.	1.60333	2.70097	3.32756	4.33025	1.49213
Os03g0277700|mRNA|AK061148|CDS+3'UTR	Os03g0277700	Protein of unknown function DUF26 domain containing protein.	0.315364	0.32273	0.878091	1.10991	2.95288
Os03g0278400|mRNA|AK070052|CDS+3'UTR	Os03g0278400	Similar to ADP ribosylation GTPase-like protein (Fragment).	1.57071	0.796106	0.331177	0.264411	0.287362
Os03g0278800|COMBINER_EST|AU077776|6	Os03g0278800	Nucleotide-binding, alpha-beta plait domain containing protein.	5.95534	4.43103	1.86491	1.35302	1.32654
Os03g0278900|mRNA|AK066019|CDS+3'UTR	Os03g0278900	ATPase, F0 complex, subunit B/B', bacterial and chloroplast family protein.	3.50578	3.2024	2.03696	1.72427	1.17763
Os03g0281100|COMBINER_EST|Os03g0281100|8	Os03g0281100	Ankyrin repeat containing protein.	0.808836	0.797619	0.520365	0.305376	0.253469
Os03g0281900|mRNA|AK072135|CDS+3'UTR	Os03g0281900	ABC transporter-like domain containing protein.	0.267668	0.273816	1.60357	4.52029	8.46661
Os03g0283100|mRNA|AK061849|CDS+3'UTR	Os03g0283100	Similar to In2-1 protein.	1.53079	5.1531	3.73398	1.67978	1.16813
Os03g0285200|COMBINER|CI426813|6	Os03g0285200	Conserved hypothetical protein.	2.3656	4.3938	3.37192	5.07657	4.47862
Os03g0285200|COMBINER|CI426813|x	Os03g0285200	Conserved hypothetical protein.	2.44696	4.80646	3.56767	6.11265	4.71858
Os03g0286900|mRNA|AK070872|CDS+3'UTR	Os03g0286900	Similar to Low-temperature induced protein lt101.2.	1.96235	2.14071	6.99021	2.26231	3.17962
Os03g0288000|mRNA|AK103162|CDS+3'UTR	Os03g0288000	Similar to Metallothionein.	2.1388	0.949957	6.72149	6.84892	3.56734
Os03g0288900|mRNA|AK100329|CDS+3'UTR	Os03g0288900	Conserved hypothetical protein.	0.930552	0.209449	0.285419	0.260332	0.327974
Os03g0292900|mRNA|AK101057|CDS+3'UTR	Os03g0292900	Conserved hypothetical protein.	3.44949	5.32662	2.82051	2.34518	1.1556
Os03g0293000|mRNA|AK063376|CDS+3'UTR	Os03g0293000	Thioredoxin fold domain containing protein.	18.6466	11.9627	5.1581	1.72117	0.984405
Os03g0294300|COMBINER_EST|Os03g0294300|8			7.92041	7.79805	3.88498	1.91951	1.45168
Os03g0295300|mRNA|AK063031|CDS+3'UTR	Os03g0295300	Conserved hypothetical protein.	1.8929	2.59656	3.60537	5.07885	4.14603
Os03g0296700|mRNA|AK067332|CDS+3'UTR	Os03g0296700	7TM GPCR, rhodopsin-like domain containing protein.	0.669465	1.69898	2.42312	3.40262	3.53117
Os03g0297100|mRNA|AK122143|CDS+3'UTR	Os03g0297100	40S ribosomal protein S7.	1.26985	0.522661	0.374098	0.124834	0.0921791
Os03g0297800|mRNA|AK107121|CDS+3'UTR	Os03g0297800	Protein kinase, core domain containing protein.	0.963011	0.213508	0.150767	0.0391972	0.0895387
Os03g0297900|COMBINER_EST|CI193735|6	Os03g0297900	Similar to laccase 90c.	0.346281	0.316398	2.14576	2.76895	3.62619
Os03g0299800|mRNA|AK064332|CDS+3'UTR	Os03g0299800	Protein of unknown function Cys-rich family protein.	5.11364	5.98057	3.85639	2.71386	1.72416
Os03g0299800|mRNA|AK103635|CDS+3'UTR	Os03g0299800	Protein of unknown function Cys-rich family protein.	5.15407	6.28167	3.74857	2.63571	1.68036
Os03g0300600|mRNA|AK059801|CDS+3'UTR	Os03g0300600	Similar to Chaperone protein dnaJ.	4.14001	4.14945	5.63721	11.6812	10.5702
Os03g0300600|mRNA|AK066250|CDS+3'UTR	Os03g0300600	Similar to Chaperone protein dnaJ.	4.17763	4.28462	5.90591	13.1445	11.5643
Os03g0300600|mRNA|AK069897|CDS+3'UTR	Os03g0300600	Similar to Chaperone protein dnaJ.	3.67164	3.65391	5.2549	9.93683	8.94511
Os03g0300600|mRNA|AK104186|CDS+3'UTR	Os03g0300600	Similar to Chaperone protein dnaJ.	4.24033	4.2418	6.19061	12.2904	11.2484
Os03g0305100|mRNA|AK101765|CDS+3'UTR	Os03g0305100	Similar to AMP-binding protein.	1.146	2.37597	5.74646	4.09086	3.28707
Os03g0305400|mRNA|AK071397|CDS+3'UTR	Os03g0305400	UspA domain containing protein.	5.14917	4.9732	12.3677	1.28492	1.3337
Os03g0305600|mRNA|AK063714|CDS+3'UTR	Os03g0305600	Mitochondrial import inner membrane translocase, subunit Tim17/22 family protein.	15.6347	31.7301	13.9253	3.23742	1.84752
Os03g0308800|mRNA|AK060285|CDS+3'UTR	Os03g0308800	Hypothetical conserved gene.	1.13425	1.59869	1.16245	0.140847	0.0417676
Os03g0308800|mRNA|AK066789|CDS+3'UTR	Os03g0308800	Hypothetical conserved gene.	1.14583	1.39294	1.02892	0.0918847	0.0265602
Os03g0308800|mRNA|AK068534|CDS+3'UTR	Os03g0308800	Tetratricopeptide-like helical domain containing protein.	1.10669	1.40655	1.1793	0.135498	0.0474286
Os03g0309300|COMBINER_EST|Os03g0309300|8	Os03g0309300	Eggshell protein family protein.	1.55098	1.24326	1.61346	7.28449	11.4337
Os03g0316200|mRNA|AK071812|CDS+3'UTR	Os03g0316200	Similar to Galactinol synthase (Fragment).	20.1501	19.9042	9.32863	1.75662	1.40315
Os03g0316200|mRNA|AK103958|CDS+3'UTR	Os03g0316200	Similar to Galactinol synthase (Fragment).	19.3164	17.2012	7.97342	1.90197	1.38934
Os03g0319400|mRNA|AK111752|CDS+3'UTR	Os03g0319400	Similar to CBL-interacting protein kinase 31.	0.76969	0.624633	0.312135	0.222173	0.284873
Os03g0319400|mRNA|AK111929|CDS+3'UTR	Os03g0319400	Oryza sativa calcineurin B-like (CBL) protein-interacting protein kinase 3.;Oryza sativa cold-inducible gene.;Serine/threonine protein kinase.;Cold stress tolerance.	0.750957	0.590154	0.310903	0.203453	0.264834
Os03g0322900|COMBINER_EST|CI387122|5	Os03g0322900	Late embryogenesis abundant protein repeat containing protein.	5.0657	3.56942	3.26349	1.16826	5.03457
Os03g0323600|mRNA|AK107871|UTR	Os03g0323600	Similar to DnaJ domain containing protein, expressed.	6.28102	4.11972	9.02243	2.82295	3.8261
Os03g0324800|mRNA|AK071431|CDS+3'UTR	Os03g0324800	Hypothetical protein.	3.95328	3.49557	2.24215	1.15601	0.790052
Os03g0324900|mRNA|AK068144|CDS+3'UTR	Os03g0324900	Zinc finger, RING/FYVE/PHD-type domain containing protein.	18.8339	22.5967	23.2207	8.19968	14.5118
Os03g0326000|mRNA|AK059185|CDS+3'UTR	Os03g0326000	Phospholipid-transporting ATPase 1 (EC 3.6.3.1) (Aminophospholipid flippase 1).	4.53309	3.00567	2.3754	1.46397	1.49152
Os03g0326100|mRNA|AK111237|CDS+3'UTR	Os03g0326100	Phospholipid-transporting ATPase 1 (EC 3.6.3.1) (Aminophospholipid flippase 1).	5.58624	4.32703	2.24413	1.11695	0.542338
Os03g0328300|COMBINER|CI462386|0	Os03g0328300	Hypothetical conserved gene.	8.94771	4.72494	3.35685	1.13346	0.98927
Os03g0329200|mRNA|AK064318|CDS+3'UTR	Os03g0329200	Similar to cDNA clone:J013002B05, full insert sequence.	0.564124	0.644212	0.248456	0.256105	0.238263
Os03g0330800|COMBINER|CI168028|6	Os03g0330800	Similar to OSIGBa0144C23.4 protein.	1.16735	1.1189	1.60378	4.09316	3.63949
Os03g0332000|COMBINER_EST|Os03g0332000|8			0.657096	0.221947	0.536262	0.331718	0.491836
Os03g0332500|COMBINER_EST|C97588|6	Os03g0332500	Similar to QM protein.	10.0063	77.1488	33.521	14.0903	2.72539
Os03g0332600|mRNA|AK058370|UTR	Os03g0332600	Non-protein coding transcript.	2.68176	3.92102	3.11805	2.4839	1.67786
Os03g0332700|mRNA|AK072820|CDS+3'UTR	Os03g0332700	Similar to ABC Transporter, ATP binding component.	4.34903	3.63315	2.37871	2.47589	1.79382
Os03g0334200|mRNA|AK066472|CDS+3'UTR	Os03g0334200	Conserved hypothetical protein.	1.09178	0.849607	0.288426	0.200564	0.361522
Os03g0334200|mRNA|AK120329|CDS+3'UTR	Os03g0334200	Conserved hypothetical protein.	0.788433	0.515501	0.213461	0.161651	0.25509
Os03g0335100|mRNA|AK107094|CDS+3'UTR	Os03g0335100	Zinc finger, RING/FYVE/PHD-type domain containing protein.	0.654733	1.57256	3.61995	3.29648	10.6108
Os03g0338000|mRNA|AK121399|CDS+3'UTR	Os03g0338000	Similar to Alanine:glyoxylate aminotransferase-like protein (Fragment).	0.113656	1.18145	0.432542	0.0947508	0.08849
Os03g0339900|mRNA|AK066021|5'UTR+CDS	Os03g0339900	Similar to cDNA clone:J013070E20, full insert sequence.	0.751448	0.770026	1.1595	6.31813	3.88599
Os03g0340500|mRNA|AK060797|CDS+3'UTR	Os03g0340500	Similar to sucrose synthase2.	3.00927	4.41064	5.25199	5.57778	5.97963
Os03g0340500|mRNA|AK099406|CDS+3'UTR	Os03g0340500	Similar to Sucrose synthase (EC 2.4.1.13).	3.21313	4.44758	5.18155	5.80607	6.19472
Os03g0340500|mRNA|AK102158|CDS+3'UTR	Os03g0340500	Similar to Sucrose synthase (EC 2.4.1.13).	2.985	4.3163	5.19002	5.61156	6.00527
Os03g0343700|mRNA|AK060603|CDS+3'UTR	Os03g0343700	Brix domain containing protein.	4.14917	3.18456	1.96831	1.70435	1.30517
Os03g0343700|mRNA|AK102274|CDS+3'UTR	Os03g0343700	Similar to predicted protein.	4.43085	3.21662	2.11218	1.68278	1.31575
Os03g0348800|mRNA|AK059731|CDS+3'UTR	Os03g0348800	Hypothetical protein.	6.46898	6.99063	5.92033	2.98584	2.23626
Os03g0348800|mRNA|AK120281|CDS+3'UTR	Os03g0348800	Lipase, class 3 family protein.	3.86662	10.958	12.1432	9.22709	7.79613
Os03g0353300|mRNA|AK111467|CDS+3'UTR	Os03g0353300	Conserved hypothetical protein.	0.834387	0.595052	0.668076	0.271324	0.27651
Os03g0356700|mRNA|AF452250|CDS	Os03g0356700	Similar to Villin 3.	0.952063	0.645421	0.374879	0.235368	0.251605
Os03g0356700|mRNA|AF453932|CDS	Os03g0356700	Similar to Villin 3.	0.900181	0.595548	0.420093	0.277808	0.292297
Os03g0357400|mRNA|AK108289|UTR	Os03g0357400	Hypothetical conserved gene.	0.590222	0.955972	1.45864	4.32545	4.02722
Os03g0358200|COMBINER_EST|CI077954|3	Os03g0358200	Similar to transmembrane protein 115.	5.69447	4.0544	2.41443	1.81032	1.65084
Os03g0363600|mRNA|AK106658|CDS+3'UTR	Os03g0363600	Similar to Sugar transporter-like protein.	0.985021	0.62986	0.651032	5.81183	3.61597
Os03g0366000|COMBINER_EST|AU092825|7	Os03g0366000	Similar to Chaperonin.	3.27215	3.93674	3.04643	2.80088	2.08988
Os03g0366800|COMBINER|CI138914|6	Os03g0366800	Similar to Heat stress transcription factor B-4d.	2.41646	0.973995	0.429864	0.326491	0.331209
Os03g0368600|COMBINER_EST|Os03g0368600|8	Os03g0368600	Similar to Class III peroxidase 42.	0.676995	0.523928	0.44329	0.235538	0.222364
Os03g0368900|mRNA|AK099751|CDS+3'UTR	Os03g0368900	Haem peroxidase family protein.	0.292698	0.18094	0.589627	1.0022	1.95389
Os03g0368900|mRNA|AK120411|CDS+3'UTR	Os03g0368900	Haem peroxidase family protein.	0.237136	0.163013	0.635584	0.911219	1.76953
Os03g0369400|COMBINER_EST|Os03g0369400|8			1.62214	1.203	1.48553	7.05014	14.9843
Os03g0374600|mRNA|AK110542|CDS+3'UTR	Os03g0374600	Hypothetical conserved gene.	2.41341	4.73444	4.13588	2.71929	3.21867
Os03g0374600|mRNA|AK120709|CDS+3'UTR	Os03g0374600	Glycoside hydrolase, family 17 protein.	2.84507	4.43563	3.85022	1.32884	1.79745
Os03g0375300|mRNA|AK070119|CDS+3'UTR	Os03g0375300	Amino acid/polyamine transporter I family protein.	0.401502	0.121158	0.0542345	0.0330492	0.0218668
Os03g0375300|mRNA|AK072316|CDS+3'UTR	Os03g0375300	Amino acid/polyamine transporter I family protein.	0.416807	0.0971099	0.048106	0.021614	0.0286917
Os03g0377100|COMBINER_EST|CI178677|6	Os03g0377100	Similar to Expansin (Expansin2).	0.184376	0.327444	0.55818	0.435735	0.613527
Os03g0381300|mRNA|AK068105|CDS+3'UTR	Os03g0381300	CS domain domain containing protein.	30.4754	33.9597	16.2657	5.67516	2.50114
Os03g0385900|mRNA|AK073780|CDS+3'UTR	Os03g0385900	Similar to ribosomal protein S11 containing protein.	1.40025	1.61464	1.8017	3.54496	3.11641
Os03g0386800|mRNA|AK066671|CDS+3'UTR	Os03g0386800	Peptidase S10, serine carboxypeptidase family protein.	0.724546	0.526109	0.406575	0.310099	0.31598
Os03g0387900|mRNA|AK063085|CDS+3'UTR	Os03g0387900	Hypothetical conserved gene.	4.71336	2.79242	1.53639	0.544248	0.200094
Os03g0390200|mRNA|AB125302|CDS+3'UTR	Os03g0390200	Serine/threonine-protein kinase SAPK1 (EC 2.7.1.37) (Osmotic stress/abscisic acid-activated protein kinase 1).	5.4596	6.82024	3.51696	2.67268	2.01448
Os03g0390200|mRNA|AK060856|CDS+3'UTR	Os03g0390200	Serine/threonine-protein kinase SAPK1 (EC 2.7.1.37) (Osmotic stress/abscisic acid-activated protein kinase 1).	5.09209	6.28761	3.30578	2.00268	1.58684
Os03g0393900|mRNA|AK069809|CDS+3'UTR	Os03g0393900	Similar to S.tuberosum patatin (Fragment).	0.313657	0.308549	0.370495	0.342226	0.463739
Os03g0395900|mRNA|AK102573|CDS+3'UTR	Os03g0395900	Conserved hypothetical protein.	4.90506	3.53339	2.73153	1.86224	1.39257
Os03g0395900|mRNA|AK120654|CDS+3'UTR	Os03g0395900	Hypothetical conserved gene.	3.66925	3.09154	2.082	1.75511	1.51271
Os03g0397700|mRNA|AK111635|CDS+3'UTR	Os03g0397700	Similar to Serine/threonine protein kinase-like protein (Strubbelig receptor family 7).	0.315125	0.250139	0.345305	0.508181	0.53135
Os03g0397700|mRNA|AK111995|CDS+3'UTR	Os03g0397700	Similar to Leucine-rich repeat transmembrane protein kinase 1-like protein.	0.378643	0.244804	0.38374	0.322054	0.462851
Os03g0399800|COMBINER_EST|CI020540|6	Os03g0399800	Mannose-binding lectin domain containing protein.	0.427364	0.446115	0.552872	0.258321	0.256966
Os03g0401300|mRNA|AF378187|CDS	Os03g0401300	Similar to Sucrose synthase metabolism (Fragment).	0.978938	0.500748	0.453025	0.239724	0.29734
Os03g0405500|mRNA|AK069583|CDS+3'UTR	Os03g0405500	Similar to PDI-like protein.	0.657927	0.412538	0.359929	0.192501	0.238126
Os03g0405500|mRNA|AK104893|CDS+3'UTR	Os03g0405500	Hypothetical conserved gene.	0.685678	0.41654	0.384714	0.202151	0.257352
Os03g0416200|mRNA|AK069631|CDS+3'UTR	Os03g0416200	BRITTLE CULM1.	0.141178	0.150432	0.687451	0.972573	1.64689
Os03g0416200|mRNA|AK105862|CDS+3'UTR	Os03g0416200	BRITTLE CULM1.	0.175696	0.173918	0.647894	0.830768	1.48894
Os03g0416500|mRNA|AK073878|CDS+3'UTR	Os03g0416500	6-phosphogluconolactonase domain containing protein.	3.74728	5.73245	5.34806	5.16372	4.6141
Os03g0416500|mRNA|AK103024|CDS+3'UTR	Os03g0416500	6-phosphogluconolactonase domain containing protein.	4.10012	5.64106	5.79786	6.35407	5.30561
Os03g0426900|mRNA|AK060637|CDS+3'UTR	Os03g0426900	Similar to APG6/CLPB-P/CLPB3 (ALBINO AND PALE GREEN 6); ATP binding / ATPase.	15.3967	9.99701	4.43427	1.73331	1.18866
Os03g0426900|mRNA|AK069123|CDS+3'UTR	Os03g0426900	Similar to Heat shock protein 101.	8.14086	4.90978	3.21431	1.8187	1.34021
Os03g0429800|mRNA|AK065099|CDS+3'UTR	Os03g0429800	Similar to Xanthine dehydrogenase 1 (EC 1.1.1.204).	2.18141	4.10159	4.02157	3.40209	3.15484
Os03g0429800|mRNA|AK067814|CDS+3'UTR	Os03g0429800	Similar to Xanthine dehydrogenase 1 (EC 1.1.1.204).	2.32713	4.69633	4.90986	4.29607	3.80113
Os03g0429800|mRNA|AK073276|CDS+3'UTR	Os03g0429800	Similar to Aldehyde oxidase and xanthine dehydrogenase, molybdopterin binding domain containing protein, expressed.	2.42404	4.29237	4.14638	3.5681	3.33443
Os03g0429800|mRNA|AK103000|CDS+3'UTR	Os03g0429800	Similar to Aldehyde oxidase and xanthine dehydrogenase, molybdopterin binding domain containing protein, expressed.	2.06687	3.5131	3.77875	3.43741	3.07791
Os03g0431600|COMBINER_EST|AU181307|6	Os03g0431600	Hypothetical conserved gene.	3.06963	3.05768	3.37209	3.93161	5.14078
Os03g0436300|COMBINER_EST|Os03g0436300|8	Os03g0436300	Similar to calmodulin binding protein.	4.89412	4.15442	2.65298	1.8772	1.46227
Os03g0436600|COMBINER_EST|Os03g0436600|8	Os03g0436600	Conserved hypothetical protein.	0.682199	0.420318	0.501355	0.220172	0.215869
Os03g0444600|COMBINER|CI225423|6			1.57029	4.13088	4.0493	4.73528	3.93158
Os03g0452000|COMBINER|CI420549|6	Os03g0452000	Non-protein coding transcript.	0.806551	1.72953	2.60214	3.42573	4.99147
Os03g0561400|COMBINER_EST|CI077113|6	Os03g0561400	Conserved hypothetical protein.	0.502343	3.4598	12.5376	3.54853	15.998
Os03g0563100|mRNA|AK109527|CDS+3'UTR	Os03g0563100	D-arabinono-1,4-lactone oxidase domain containing protein.	0.240267	0.231273	0.308638	0.239147	0.316664
Os03g0564600|mRNA|AK108950|CDS+3'UTR	Os03g0564600	Protein of unknown function DUF26 domain containing protein.	0.319812	0.29315	0.837716	0.343743	0.727297
Os03g0568400|COMBINER_EST|Os03g0568400|8			7.847	15.6848	6.14829	0.520665	0.668106
Os03g0568800|mRNA|AK070389|CDS+3'UTR	Os03g0568800	Protein kinase, core domain containing protein.	6.44461	8.36355	5.36738	2.27135	1.75578
Os03g0568800|mRNA|AK099276|CDS+3'UTR	Os03g0568800	Protein kinase, core domain containing protein.	9.41563	14.922	9.01542	3.29512	2.58126
Os03g0571700|mRNA|AK107345|CDS+3'UTR	Os03g0571700	Similar to TRANSPARENT TESTA 12 protein.	0.662915	0.154156	0.253445	0.343472	0.439105
Os03g0576600|COMBINER_EST|Os03g0576600|8	Os03g0576600	Acyl-CoA-binding protein (ACBP).	0.980224	0.562473	0.431218	0.281097	0.322032
Os03g0576900|mRNA|AK064598|CDS+3'UTR	Os03g0576900	Hypothetical conserved gene.	3.15111	3.3984	1.52909	1.25912	1.18244
Os03g0581600|COMBINER_EST|Os03g0581600|8	Os03g0581600	Similar to DAG protein.	6.47308	3.70525	1.50469	3.12947	2.2171
Os03g0586400|mRNA|AK065713|CDS+3'UTR	Os03g0586400	Conserved hypothetical protein.	1.28077	1.23222	1.40948	6.3188	4.83888
Os03g0586500|mRNA|AK059901|CDS+3'UTR	Os03g0586500	Conserved hypothetical protein.	0.672989	1.77681	3.20143	20.4478	17.4608
Os03g0586500|mRNA|AK068097|CDS+3'UTR	Os03g0586500	Conserved hypothetical protein.	0.68823	1.94955	3.26372	21.9314	17.1749
Os03g0586600|mRNA|AK070943|CDS+3'UTR	Os03g0586600	Similar to DNA-DIRECTED RNA POLYMERASES I, II, AND III 15 KD POLYPEPTIDE(RPABC6).	4.44714	3.50258	1.73229	0.853958	0.466369
Os03g0587200|mRNA|AK121995|CDS+3'UTR	Os03g0587200	Kinesin, motor region domain containing protein.	1.01251	0.207602	0.25003	0.193773	0.376693
Os03g0589100|COMBINER|CI223103|6	Os03g0589100	Conserved hypothetical protein.	1.98145	1.1677	6.29505	2.85854	9.39594
Os03g0589500|mRNA|AK105481|CDS+3'UTR	Os03g0589500	Conserved hypothetical protein.	0.213603	0.485628	0.858203	6.88778	6.06116
Os03g0593700|COMBINER_EST|Os03g0593700|8	Os03g0593700	Hypothetical conserved gene.	0.260683	0.326799	0.338084	0.391547	0.332826
Os03g0594900|mRNA|AK069017|CDS+3'UTR	Os03g0594900	Cytochrome P450 family protein.	13.8523	16.5422	10.9093	4.50349	1.48861
Os03g0599600|mRNA|AK066487|CDS+3'UTR	Os03g0599600	Regulator of chromosome condensation, RCC1 domain containing protein.	3.67163	6.43791	4.08876	4.25454	3.04266
Os03g0601300|COMBINER|AU075609|6			2.36393	3.08579	2.93365	3.77078	3.19537
Os03g0612400|COMBINER|CI418969|x	Os03g0612400	Similar to predicted protein.	0.824323	0.63025	0.307896	0.235912	0.184598
Os03g0619100|mRNA|AK119803|CDS+3'UTR	Os03g0619100	Zinc finger, Dof-type family protein.	1.23762	5.74411	0.687234	0.449341	0.287389
Os03g0622500|mRNA|AK100879|CDS+3'UTR	Os03g0622500	Hypothetical gene.	2.1404	3.20203	3.10496	3.64577	2.43546
Os03g0624300|mRNA|AK062353|CDS+3'UTR	Os03g0624300	Hypothetical protein.	0.729267	1.36355	2.6687	3.37594	7.54071
Os03g0626400|mRNA|AK062861|UTR	Os03g0626400	Hypothetical conserved gene.	0.808037	0.546995	0.339647	0.191176	0.221245
Os03g0637600|mRNA|AK061561|CDS+3'UTR	Os03g0637600	Similar to systemin receptor SR160.	0.113749	0.196152	0.481817	0.460784	0.751319
Os03g0637600|mRNA|AK068135|CDS+3'UTR	Os03g0637600	Leucine-rich repeat, plant specific containing protein.	0.204355	0.303214	0.586228	0.507103	0.755842
Os03g0637600|mRNA|AK109350|CDS+3'UTR	Os03g0637600	Leucine-rich repeat, plant specific containing protein.	0.125239	0.254426	0.487541	0.458773	0.730116
Os03g0638200|mRNA|AK069267|5'UTR+CDS	Os03g0638200	Similar to Major facilitator superfamily protein, expressed.	0.958691	3.04162	3.49432	0.881187	0.680315
Os03g0638300|COMBINER|CI527621|6	Os03g0638300	Tesmin/TSO1-like, CXC domain containing protein.	1.2502	0.715428	1.05506	0.232254	0.162743
Os03g0650700|mRNA|AK102195|CDS+3'UTR	Os03g0650700	Translation elongation factor EFG/EF2, C-terminal domain containing protein.	3.59933	3.66739	2.80826	3.12371	2.52844
Os03g0660000|mRNA|AK111052|CDS+3'UTR	Os03g0660000	Hypothetical protein.	0.535978	1.76751	2.73871	4.88042	6.08487
Os03g0663400|mRNA|AK102798|CDS+3'UTR	Os03g0663400	Similar to Thaumatin-like protein.	2.29562	8.15619	15.9221	17.714	12.3248
Os03g0663400|mRNA|AK102970|CDS+3'UTR	Os03g0663400	Similar to Thaumatin-like protein.	2.31465	8.78558	17.1504	19.6955	11.972
Os03g0663400|mRNA|AK119160|CDS+3'UTR	Os03g0663400	Similar to Thaumatin-like protein.	2.21622	8.21839	16.2447	18.9149	11.6356
Os03g0664400|mRNA|AK058628|CDS+3'UTR	Os03g0664400	Fibroin.	0.755152	0.488882	1.4241	3.25434	5.54718
Os03g0664400|mRNA|AK059831|CDS+3'UTR	Os03g0664400	Expressed protein (With alternative splicing).	0.232197	0.102706	1.49714	3.63105	6.07276
Os03g0664800|COMBINER_EST|CI543152|4	Os03g0664800	Acyl-CoA N-acyltransferase domain containing protein.	1.18469	4.13677	2.53006	4.48751	4.68028
Os03g0667100|mRNA|AK065952|CDS+3'UTR	Os03g0667100	Similar to NPR1-like protein.	6.899	4.04607	1.55139	0.957964	0.583397
Os03g0667100|mRNA|AK101223|CDS+3'UTR	Os03g0667100	Similar to BTB/POZ domain containing protein, expressed.	6.2093	5.42319	3.05151	2.22525	1.33474
Os03g0667300|COMBINER_EST|CI162465|6	Os03g0667300	Similar to Metal transport protein.	0.837354	1.69264	2.09526	3.86898	3.77426
Os03g0668400|mRNA|AK119454|CDS+3'UTR	Os03g0668400	Peptidase C12, ubiquitin carboxyl-terminal hydrolase 1 domain containing protein.	0.27268	0.38284	0.619952	1.39112	3.39363
Os03g0669100|mRNA|AK063633|CDS+3'UTR	Os03g0669100	Similar to Deoxyuridine 5'-triphosphate nucleotidohydrolase (EC 3.6.1.23) (dUTPase) (dUTP pyrophosphatase) (P18).	0.98108	0.199837	0.273117	0.557237	0.567024
Os03g0669100|mRNA|AK063742|CDS+3'UTR	Os03g0669100	Similar to predicted protein.	0.874634	0.223715	0.278149	0.546933	0.599116
Os03g0672400|mRNA|AK061599|CDS+3'UTR	Os03g0672400	Conserved hypothetical protein.	0.923281	0.206022	0.224049	0.0881278	0.251594
Os03g0674300|mRNA|AK063948|CDS+3'UTR	Os03g0674300	Similar to PGPS/D5 (Fragment).	4.48595	5.17792	3.76282	3.65916	2.44721
Os03g0679700|mRNA|AK062075|CDS+3'UTR	Os03g0679700	Similar to thiamine biosynthesis protein thiC.	0.678689	0.368831	0.717239	7.56045	8.12734
Os03g0679700|mRNA|AK064949|CDS+3'UTR	Os03g0679700	Similar to Thiamine biosynthesis protein thiC.	0.680856	0.400557	0.737806	6.30586	7.02133
Os03g0679700|mRNA|AK065235|CDS+3'UTR	Os03g0679700	Similar to Thiamine biosynthesis protein thiC.	0.613372	0.506637	1.09828	14.3214	13.9718
Os03g0679700|mRNA|AK068703|CDS+3'UTR	Os03g0679700	Similar to Thiamine biosynthesis protein thiC.	0.274455	0.342394	1.14448	20.021	18.0071
Os03g0679700|mRNA|AK120238|CDS+3'UTR	Os03g0679700	Similar to Thiamine biosynthesis protein thiC.	0.285414	0.332437	1.09075	16.4262	16.9108
Os03g0684400|mRNA|AK100086|CDS+3'UTR	Os03g0684400	Mg2+ transporter protein, CorA-like domain containing protein.	0.955399	1.03989	0.882017	0.239527	0.124094
Os03g0687400|COMBINER|CI211969|6	Os03g0687400	Ribosome-inactivating protein family protein.	0.239817	0.252389	0.934245	2.93133	2.38169
Os03g0691800|mRNA|AK073577|CDS+3'UTR	Os03g0691800	Similar to HIPL1 protein precursor.	0.317513	0.476507	0.290296	0.645899	0.593894
Os03g0692400|mRNA|AK070368|CDS+3'UTR	Os03g0692400	Protein of unknown function DUF966 family protein.	0.354759	0.255151	0.215954	0.253677	0.343609
Os03g0692400|mRNA|AK101780|CDS+3'UTR	Os03g0692400	Protein of unknown function DUF966 family protein.	0.354518	0.27159	0.226609	0.256553	0.346243
Os03g0701100|mRNA|AK109455|CDS+3'UTR	Os03g0701100	Similar to Prp18 domain containing protein, expressed.	88.6644	21.3744	17.8935	6.68083	6.59567
Os03g0701100|mRNA|AK110740|CDS+3'UTR	Os03g0701100	Similar to Prp18 domain containing protein, expressed.	153.156	55.8418	24.3749	7.02867	8.48592
Os03g0701100|mRNA|AK120078|CDS+3'UTR	Os03g0701100	Similar to Pre-mRNA splicing factor PRP18.	68.4614	40.7876	38.5883	21.2275	13.9747
Os03g0701200|mRNA|AK061528|CDS+3'UTR	Os03g0701200	Similar to Sugar-starvation induced protein (Fragment).	1.08117	2.37691	4.8229	3.83493	5.49765
Os03g0701200|mRNA|AK061982|CDS+3'UTR	Os03g0701200	Similar to Sugar-starvation induced protein (Fragment).	1.10958	2.22574	4.65628	3.65121	4.93192
Os03g0701200|mRNA|AK099563|CDS+3'UTR	Os03g0701200	Similar to Sugar-starvation induced protein (Fragment).	1.20011	2.27135	4.81779	3.58683	5.13067
Os03g0701400|mRNA|AK066971|CDS+3'UTR	Os03g0701400	Conserved hypothetical protein.	5.04106	6.27028	4.4324	2.43552	2.86997
Os03g0701400|mRNA|AK120400|CDS+3'UTR	Os03g0701400	Conserved hypothetical protein.	0.214214	0.488114	2.0984	2.55567	5.31459
Os03g0702500|mRNA|AK064270|CDS+3'UTR	Os03g0702500	UDP-glucuronosyl/UDP-glucosyltransferase family protein.	6.98473	5.40168	4.38987	1.77946	1.19705
Os03g0704200|mRNA|AK071176|CDS+3'UTR	Os03g0704200	Zinc finger, MYND-type domain containing protein.	3.14102	4.15491	2.92115	1.86898	1.45947
Os03g0709000|mRNA|AK062406|CDS+3'UTR	Os03g0709000	Membrane-associated, eicosanoid and glutathione metabolism (MAPEG) domain containing protein.	7.69719	5.80758	2.22908	0.785158	0.620445
Os03g0709100|mRNA|AK061596|CDS+3'UTR	Os03g0709100	Similar to Basic blue protein (Cusacyanin) (Plantacyanin) (CBP).	1.92	0.934029	0.493526	0.276442	0.270195
Os03g0710500|COMBINER_EST|Os03g0710500|8	Os03g0710500	Similar to Luminal binding protein.	81.7967	140.681	25.6187	6.38401	6.36237
Os03g0712100|mRNA|AK106258|CDS+3'UTR	Os03g0712100	Cell division cycle-associated protein domain containing protein.	1.20605	0.200245	0.236087	0.116982	0.273907
Os03g0712600|mRNA|AK103705|CDS+3'UTR	Os03g0712600	Hypothetical protein.	0.41993	2.76969	3.82963	5.10855	3.84054
Os03g0712700|mRNA|AK121196|CDS+3'UTR	Os03g0712700	Similar to Phosphoglucomutase.	3.96646	4.00066	3.43582	1.6276	1.6502
Os03g0718800|COMBINER_EST|CI255934|6	Os03g0718800	Similar to Physical impedance induced protein.	2.02331	4.67367	7.05573	7.09266	4.56043
Os03g0719400|mRNA|AK120822|CDS+3'UTR	Os03g0719400	Alpha/beta hydrolase fold-1 domain containing protein.	17.3356	12.194	7.73532	2.92148	2.11214
Os03g0721700|mRNA|AK106706|CDS+3'UTR	Os03g0721700	Protein of unknown function DUF569 family protein.	0.692219	0.530803	0.774486	0.218875	0.152339
Os03g0721900|COMBINER_EST|CI237672|6	Os03g0721900	Similar to Histone H2A.	6.48926	3.61504	2.21776	2.23116	2.39117
Os03g0722000|mRNA|AK069866|CDS+3'UTR	Os03g0722000	Hypothetical conserved gene.	1.02995	0.866835	0.702179	0.292661	0.195141
Os03g0722000|mRNA|AK071718|CDS+3'UTR	Os03g0722000	Hyccin domain containing protein.	0.856553	0.537202	0.452152	0.0840416	0.258661
Os03g0723700|mRNA|AK101260|CDS+3'UTR	Os03g0723700	Conserved hypothetical protein.	2.74769	11.3729	5.53365	1.43728	1.12221
Os03g0724500|mRNA|AK121328|CDS+3'UTR	Os03g0724500	Conserved hypothetical protein.	16.6117	20.4715	10.3879	5.08154	3.18067
Os03g0725200|mRNA|AK106493|CDS+3'UTR	Os03g0725200	Conserved hypothetical protein.	3.17491	2.60984	86.7278	1.22678	0.869618
Os03g0727800|mRNA|AK109453|CDS+3'UTR	Os03g0727800	Cyclin-like F-box domain containing protein.	6.02128	3.00184	1.63375	0.603456	0.534956
Os03g0729000|mRNA|AK108046|CDS+3'UTR	Os03g0729000	Conserved hypothetical protein.	76.8239	17.7687	12.584	2.79424	2.96195
Os03g0730400|mRNA|AK104942|CDS+3'UTR	Os03g0730400	Similar to Serine carboxypeptidase family protein, expressed.	0.740036	0.604534	0.383508	0.187186	0.197964
Os03g0730500|mRNA|AK066477|CDS+3'UTR	Os03g0730500	Peptidase S10, serine carboxypeptidase family protein.	0.543527	0.319409	0.371644	0.209724	0.348837
Os03g0733800|COMBINER_EST|CI143006|6	Os03g0733800	Endoplasmic reticulum oxidoreductin 1 family protein.	4.53175	4.82967	2.16415	1.44158	1.28446
Os03g0734200|mRNA|AK102957|CDS+3'UTR	Os03g0734200	Hypothetical protein.	4.14454	5.87068	2.42881	1.27533	0.865859
Os03g0736500|COMBINER_EST|CI227654|6	Os03g0736500	Syntaxin-related protein KNOLLE (Syntaxin 111) (AtSYP111).	0.618422	0.198362	0.243054	0.107105	0.281818
Os03g0738600|mRNA|AK073529|CDS+3'UTR	Os03g0738600	Similar to Lipoxygenase L-2 (EC 1.13.11.12).	0.294538	0.204272	0.183607	0.75991	0.127212
Os03g0738600|mRNA|X64396|CDS+3'UTR	Os03g0738600	Similar to Lipoxygenase L-2 (EC 1.13.11.12).	0.262618	0.180858	0.133813	0.902506	0.121025
Os03g0741700|COMBINER_EST|CI363564|6	Os03g0741700	Hypothetical conserved gene.	5.81684	3.15046	1.78856	1.16116	1.12574
Os03g0743500|mRNA|AK067697|CDS+3'UTR	Os03g0743500	Similar to Calmodulin 1 (Fragment).	3.95268	4.74908	1.53931	1.64229	1.50621
Os03g0744300|mRNA|AK067800|CDS+3'UTR	Os03g0744300	Similar to Protein kinase domain containing protein, expressed.	1.09858	0.551528	0.320555	0.224282	0.18026
Os03g0745000|mRNA|AF140500|CDS+3'UTR	Os03g0745000	Similar to Heat stress transcription factor A-2a.	252.098	52.2048	20.4263	4.0867	1.55684
Os03g0745000|mRNA|AK069579|CDS+3'UTR	Os03g0745000	Winged helix repressor DNA-binding domain containing protein.	316.759	48.5962	18.5024	3.57346	1.91169
Os03g0745000|mRNA|AK109590|CDS+3'UTR	Os03g0745000	Similar to Heat stress transcription factor A-2a.	196.689	71.8959	27.3125	9.45998	4.00896
Os03g0745000|mRNA|AY332465|CDS+3'UTR	Os03g0745000	Similar to Heat stress transcription factor A-2a.	215.786	76.8603	21.3661	3.43531	2.70357
Os03g0745000|mRNA|AY344486|CDS+3'UTR	Os03g0745000	Similar to Heat stress transcription factor A-2a.	289.506	78.9431	23.8688	3.73032	2.54688
Os03g0745600|COMBINER_EST|CI457848|0	Os03g0745600	Uncharacterised protein family UPF0005 domain containing protein.	92.5306	88.83	38.3831	9.12148	3.32889
Os03g0747100|COMBINER_EST|CI065784|4	Os03g0747100	Conserved hypothetical protein.	1.16345	0.174944	0.223115	0.120129	0.333518
Os03g0747900|mRNA|AY374515|CDS+3'UTR	Os03g0747900	Similar to Myosin heavy chain class XI E1 protein.	1.19994	1.09118	0.516127	0.279829	0.304891
Os03g0747900|mRNA|AY374517|CDS+3'UTR	Os03g0747900	Similar to Myosin heavy chain class XI E1 protein.	1.20449	1.06962	0.446379	0.262272	0.288957
Os03g0749400|COMBINER_EST|Os03g0749400|8			1.30698	1.1218	1.78997	5.44498	7.91427
Os03g0749800|mRNA|AK111770|CDS+3'UTR	Os03g0749800	Similar to Tousled-like protein kinase.	7.77062	6.42856	4.34859	2.51434	2.25647
Os03g0750000|mRNA|AK071321|CDS+3'UTR	Os03g0750000	Rossmann-like alpha/beta/alpha sandwich fold domain containing protein.	3.04322	24.3802	80.8378	12.8227	14.6107
Os03g0750100|COMBINER_EST|CI367911|0	Os03g0750100	Similar to Tetratricopeptide repeat domain 4.	2.61358	3.93293	4.21173	5.28706	4.54156
Os03g0750300|COMBINER_EST|Os03g0750300|8	Os03g0750300	Hypothetical conserved gene.	1.47691	0.606016	0.381166	0.261012	0.230303
Os03g0751100|mRNA|AK102404|CDS+3'UTR	Os03g0751100	Similar to Isp4 protein-like.	0.653938	0.44009	0.288284	0.281888	0.282923
Os03g0751100|mRNA|AY224494|5'UTR+CDS	Os03g0751100	Similar to Isp4 protein-like.	0.551106	0.385326	0.300808	0.254623	0.359595
Os03g0758300|mRNA|AK060339|CDS+3'UTR	Os03g0758300	Similar to Cyclic nucleotide-gated ion channel 2 (Fragment).	0.437178	0.214112	0.313908	0.369682	0.537637
Os03g0758300|mRNA|AK067626|CDS+3'UTR	Os03g0758300	Similar to Cyclic nucleotide-gated ion channel 2 (AtCNGC2) (Cyclic nucleotide-and calmodulin-regulated ion channel 2) (DEFENSE NO DEATH 1).	0.379793	0.20382	0.288421	0.401593	0.535853
Os03g0758800|mRNA|AK060387|CDS+3'UTR	Os03g0758800	Similar to Eukaryotic translation initiation factor 5A-2 (eIF-5A-2) (eIF-4D).	1.0464	0.433948	0.23968	0.2196	0.210404
Os03g0759700|mRNA|AK072833|CDS+3'UTR	Os03g0759700	Similar to ER33 protein (Fragment).	0.612524	0.502377	0.302304	0.295113	0.430372
Os03g0760200|mRNA|AK066760|CDS+3'UTR	Os03g0760200	Cytochrome P450 family protein.	1.15295	1.93135	3.01818	2.23431	3.1018
Os03g0760200|mRNA|AK104825|CDS+3'UTR	Os03g0760200	Cytochrome P450 family protein.	1.17804	1.89783	3.18974	2.31984	3.06315
Os03g0764000|COMBINER_EST|Os03g0764000|8	Os03g0764000	Acyl-CoA N-acyltransferase domain containing protein.	0.348118	0.83826	0.826083	0.212396	0.20303
Os03g0765400|mRNA|AK065267|CDS+3'UTR	Os03g0765400	Conserved hypothetical protein.	0.894618	2.53373	3.12986	3.81245	3.34446
Os03g0766500|mRNA|AK108408|CDS+3'UTR	Os03g0766500	Similar to Two-component response regulator ARR1. Splice isoform 2.	0.307454	0.58333	0.486191	0.243551	0.249928
Os03g0766600|mRNA|AK121417|CDS+3'UTR	Os03g0766600	Conserved hypothetical protein.	1.21211	2.76362	70.2365	5.03542	5.64099
Os03g0770900|mRNA|AK106660|CDS+3'UTR	Os03g0770900	Conserved hypothetical protein.	1.16561	0.419009	0.446894	0.164796	0.306465
Os03g0775000|COMBINER_EST|AU057613|7	Os03g0775000	Similar to predicted protein.	0.697581	1.3416	1.37632	0.172092	0.0764016
Os03g0776900|mRNA|AK107941|CDS+3'UTR	Os03g0776900	Similar to DNAJ protein-like.	34.5794	28.6095	17.3171	9.75869	6.96306
Os03g0778400|COMBINER_EST|Os03g0778400|8	Os03g0778400	Similar to predicted protein.	4.39129	3.12183	2.24889	0.767754	0.674409
Os03g0781300|mRNA|AK120661|CDS+3'UTR	Os03g0781300	Conserved hypothetical protein.	8.37289	18.9375	5.59329	2.1246	1.37872
Os03g0790500|mRNA|AK107136|CDS+3'UTR	Os03g0790500	Alpha/beta hydrolase fold-3 domain containing protein.	0.578015	3.50117	3.29577	1.30222	0.974791
Os03g0793000|mRNA|AK108205|CDS+3'UTR	Os03g0793000	Zinc finger, AN1-type domain containing protein.	2.59072	5.78206	5.12962	2.56585	2.19166
Os03g0793000|mRNA|AY526867|CDS+3'UTR	Os03g0793000	Zinc finger, AN1-type domain containing protein.	1.88793	3.69577	3.6207	1.42983	1.52157
Os03g0793300|mRNA|AK108384|CDS+3'UTR	Os03g0793300	Similar to Expressed protein (Zinc finger-like protein).	1.18852	2.78337	16.5382	14.5377	26.0832
Os03g0793700|mRNA|AK121667|CDS+3'UTR	Os03g0793700	RmlC-like jelly roll fold domain containing protein.	42.7741	74.6274	20.3573	6.49717	1.48504
Os03g0793700|mRNA|AY098743|CDS+3'UTR	Os03g0793700	RmlC-like jelly roll fold domain containing protein.	1.75457	2.40521	1.26802	0.296871	0.276036
Os03g0793700|mRNA|U45321|CDS	Os03g0793700	RmlC-like jelly roll fold domain containing protein.	4.35528	7.04499	2.70988	1.37968	1.03696
Os03g0793800|mRNA|AK058812|CDS+3'UTR	Os03g0793800	Plant lipid transfer protein and hydrophobic protein, helical domain containing protein.	0.130533	0.129171	0.807877	1.62584	2.99423
Os03g0796000|mRNA|AK064912|CDS+3'UTR	Os03g0796000	Similar to Ripening-associated protein (Fragment).	16.3344	15.195	7.8895	2.71337	1.78674
Os03g0796000|mRNA|U16747|UTR	Os03g0796000	Hypothetical conserved gene.	15.4898	15.7355	10.4141	3.43542	2.28556
Os03g0797900|COMBINER_EST|Os03g0797900|8			1.42522	0.999173	1.18355	3.71195	6.39174
Os03g0800000|mRNA|AK064790|CDS+3'UTR	Os03g0800000	Similar to nitrate and chloride transporter.	0.103133	0.158345	0.374627	0.649757	0.898029
Os03g0802200|mRNA|AK111769|CDS+3'UTR	Os03g0802200	Conserved hypothetical protein.	13.9906	19.6714	11.4442	3.07323	2.70504
Os03g0803500|mRNA|AK059759|CDS+3'UTR	Os03g0803500	Similar to Prolyl 4-hydroxylase alpha-1 subunit-like protein.	3.95946	4.28099	3.90866	1.66977	1.18799
Os03g0804400|mRNA|AK073430|CDS+3'UTR	Os03g0804400	Similar to predicted protein.	3.28398	3.04214	2.30343	1.87405	1.55957
Os03g0804500|mRNA|AK062698|CDS+3'UTR	Os03g0804500	Similar to Germin-like protein subfamily T member 1 precursor.	0.370258	0.320578	0.182239	1.36793	1.14654
Os03g0805600|COMBINER_EST|CI439180|6	Os03g0805600	Similar to pheophorbide a oxygenase.	0.920479	1.58822	1.74471	0.270581	0.139535
Os03g0807500|COMBINER_EST|Os03g0807500|8	Os03g0807500	Cupredoxin domain containing protein.	0.844036	0.371467	0.353882	0.229223	0.189622
Os03g0807900|mRNA|AK060962|CDS+3'UTR	Os03g0807900	Chaperonin-like RbcX family protein.	2.51088	6.11962	15.3547	0.861601	0.951423
Os03g0807900|mRNA|AK070287|CDS+3'UTR	Os03g0807900	Chaperonin-like RbcX family protein.	2.64889	6.99573	17.5598	1.16	1.17519
Os03g0808000|COMBINER_EST|Os03g0808000|8	Os03g0808000	Similar to Polygalacturonase B (Fragment).	0.246021	0.225825	0.4008	0.431699	0.617054
Os03g0808900|mRNA|AK065100|CDS+3'UTR	Os03g0808900	Similar to Seed imbibition protein (Fragment).	7.14998	8.24109	8.08684	7.00795	5.16011
Os03g0813700|COMBINER|CI464077|6	Os03g0813700	Proteinase inhibitor I29, cathepsin propeptide domain containing protein.	0.30677	0.362262	3.63086	2.27683	1.86973
Os03g0815100|mRNA|AK067690|CDS+3'UTR	Os03g0815100	Similar to OsNAC6 protein.	2.51472	3.17361	3.08734	1.75567	2.67419
Os03g0815200|mRNA|AK121351|CDS+3'UTR	Os03g0815200	Similar to Methylenetetrahydrofolate reductase (EC 1.5.1.20).	4.60109	7.27887	2.83363	1.18051	0.888451
Os03g0815700|mRNA|AK065405|CDS+3'UTR	Os03g0815700	K Homology domain containing protein.	0.441428	0.297559	0.30415	0.329006	0.385265
Os03g0820200|COMBINER|CI206634|6			11.7743	10.8683	5.97918	3.71883	4.96929
Os03g0820300|mRNA|AK068861|CDS+3'UTR	Os03g0820300	Similar to ZPT2-14.	12.4657	12.3058	6.71947	5.84719	8.47342
Os03g0820300|mRNA|AY286474|CDS+3'UTR	Os03g0820300	Similar to ZPT2-14.	7.78856	7.42542	4.16094	2.92405	4.33713
Os03g0820400|mRNA|AK119690|CDS+3'UTR	Os03g0820400	Similar to ZPT2-13.	3.22357	1.29465	0.700761	0.141057	0.387948
Os03g0820400|mRNA|AY305864|CDS+3'UTR	Os03g0820400	Similar to ZPT2-13.	3.44894	1.29747	0.61938	0.152799	0.383694
Os03g0820500|COMBINER_EST|CI417173|1	Os03g0820500	Similar to WCOR719.	3.5743	10.2907	23.3317	3.40579	4.22347
Os03g0822400|mRNA|AK070075|CDS+3'UTR	Os03g0822400	Conserved hypothetical protein.	33.8379	29.6549	10.6707	1.69477	1.13122
Os03g0822400|mRNA|AK102425|CDS+3'UTR	Os03g0822400	Conserved hypothetical protein.	42.4209	32.3614	11.631	1.80894	1.19338
Os03g0822700|mRNA|AK061682|CDS+3'UTR	Os03g0822700	Similar to Armadillo/beta-catenin-like repeat family protein.	13.4417	6.36423	2.93793	1.68832	1.35018
Os03g0822700|mRNA|AK101448|CDS+3'UTR	Os03g0822700	Armadillo-like helical domain containing protein.	13.2704	6.69793	3.07827	1.63985	1.34091
Os03g0823800|mRNA|AK058223|CDS+3'UTR	Os03g0823800	Similar to permease I.	1.36543	0.844564	0.384278	0.285204	0.308797
Os03g0823800|mRNA|AK071234|CDS+3'UTR	Os03g0823800	Similar to Permease 1.	1.4937	0.86172	0.391578	0.294976	0.318278
Os03g0824600|COMBINER_EST|Os03g0824600|8	Os03g0824600	Similar to cytokinin-N-glucosyltransferase 1.	1.44465	1.08533	1.2962	4.33561	6.10193
Os03g0826800|mRNA|AK065702|CDS+3'UTR	Os03g0826800	Conserved hypothetical protein.	0.63258	1.17811	7.39959	24.2045	29.7623
Os03g0826800|mRNA|AK119789|CDS+3'UTR	Os03g0826800	Conserved hypothetical protein.	0.657033	1.13001	6.98326	33.2357	39.2708
Os03g0832200|mRNA|AK070712|CDS+3'UTR	Os03g0832200	Similar to Calcium-binding protein precursor (Calreticulin).	1.93823	4.27139	3.24313	1.77416	1.24828
Os03g0833300|mRNA|AK069847|CDS+3'UTR	Os03g0833300	Similar to Squamosa-promoter binding-like protein 8.	0.960663	0.538835	0.361352	0.289798	0.293312
Os03g0834300|COMBINER|CI434063|6	Os03g0834300	Hypothetical conserved gene.	0.829929	1.42217	2.0638	3.20524	4.2837
Os03g0835900|mRNA|AK121063|CDS+3'UTR	Os03g0835900	Similar to Ferredoxin III, chloroplast precursor (Fd III).	3.90635	3.27323	2.32249	1.27918	0.916049
Os03g0837300|mRNA|AK111243|CDS+3'UTR	Os03g0837300	Similar to Nicotinate phosphoribosyltransferase-like protein.	3.38648	3.74365	2.92996	2.66584	1.87858
Os03g0843300|mRNA|AK101917|CDS+3'UTR	Os03g0843300	Late embryogenesis abundant protein 2 family protein.	2.03038	1.40685	0.381975	0.258304	0.186666
Os03g0844900|mRNA|AK100284|CDS+3'UTR	Os03g0844900	Nucleic acid-binding, OB-fold-like domain containing protein.	0.71071	0.516664	0.43879	0.262927	0.2662
Os03g0847900|mRNA|AK119609|CDS+3'UTR	Os03g0847900	PAK-box/P21-Rho-binding domain containing protein.	0.443255	0.368358	0.304833	0.31536	0.349333
Os03g0848700|mRNA|AK065798|CDS+3'UTR	Os03g0848700	Similar to TDRGA-1 (Fragment).	1.83467	3.06598	2.19552	3.25607	3.06097
Os03g0850700|mRNA|AK061542|CDS+3'UTR	Os03g0850700	Similar to Phosphatidylinositol phosphatidylcholine transfer protein sec14 cytosolic-like protein.	3.09294	2.45954	1.95549	0.456629	0.214675
Os03g0850700|mRNA|AK062083|CDS+3'UTR	Os03g0850700	Similar to Phosphatidylinositol phosphatidylcholine transfer protein sec14 cytosolic-like protein.	2.66752	1.87593	1.49763	0.3086	0.126229
Os03g0851700|mRNA|AK068082|CDS+3'UTR	Os03g0851700	Similar to TGB12K interacting protein 3.	1.04349	0.870999	0.842482	0.322826	0.303669
Os03g0857500|mRNA|AK062332|CDS+3'UTR	Os03g0857500	Similar to H0201G08.9 protein.	0.780641	0.33916	0.299624	0.318885	0.389815
Os03g0857500|mRNA|AK072880|CDS+3'UTR	Os03g0857500	Protein of unknown function DUF303, acetylesterase putative domain containing protein.	0.849083	0.361904	0.31778	0.315997	0.411245
Os03g0859700|mRNA|AY224481|5'UTR+CDS	Os03g0859700	Similar to RuBisCO subunit binding-protein alpha subunit, chloroplast precursor (60 kDa chaperonin alpha subunit) (CPN-60 alpha) (Fragment).	3.16634	3.76427	2.03432	1.21252	0.653609
Os03g0860100|mRNA|AK109390|CDS+3'UTR	Os03g0860100	Similar to Ethylene-responsive transcription factor 2 (Ethylene-responsive element binding factor 2) (EREBP-2) (AtERF2).	0.305486	1.22836	2.51516	1.38574	3.10594
Os03g0861400|COMBINER_EST|Os03g0861400|8	Os03g0861400	Hypothetical conserved gene.	0.408004	0.450321	0.490812	0.245221	0.219024
Os04g0103400|mRNA|AK062504|UTR	Os04g0103400	Hypothetical conserved gene.	0.589101	0.444088	0.275838	0.227058	0.250248
Os04g0103500|mRNA|AK073860|CDS+3'UTR	Os04g0103500	Serine/threonine protein kinase-related domain containing protein.	0.740489	7.33287	3.67008	3.4089	3.0688
Os04g0107600|mRNA|AK058573|CDS+3'UTR	Os04g0107600	Arginine decarboxylase (EC 4.1.1.19).	0.947565	0.340513	0.304612	0.871944	0.204272
Os04g0107600|mRNA|AK121110|CDS+3'UTR	Os04g0107600	Arginine decarboxylase (EC 4.1.1.19).	0.904144	0.321115	0.267836	1.02935	0.161306
Os04g0107900|mRNA|AK063568|5'UTR+CDS	Os04g0107900	Heat shock protein 81-1 (HSP81-1) (Heat shock protein 83).	102.194	90.6948	41.0233	8.14945	5.3426
Os04g0107900|mRNA|AK063629|CDS+3'UTR	Os04g0107900	Similar to Heat shock protein 82.	109.999	120.123	80.1659	40.1086	15.2634
Os04g0107900|mRNA|AK063698|CDS+3'UTR	Os04g0107900	Similar to Heat shock protein 82.	26.5984	27.4693	26.3146	19.1769	10.2592
Os04g0107900|mRNA|AK063751|CDS+3'UTR	Os04g0107900	Similar to Heat shock protein 80.	24.1833	23.283	25.2697	16.5802	9.92018
Os04g0107900|mRNA|AK105370|CDS+3'UTR	Os04g0107900	Similar to Heat shock protein 82.	94.9899	125.357	79.42	37.4041	14.4115
Os04g0115700|mRNA|AK072148|CDS+3'UTR	Os04g0115700	Hypothetical protein.	1.01919	1.52981	2.97519	7.29601	6.05536
Os04g0116800|mRNA|AK119922|CDS+3'UTR	Os04g0116800	Similar to Very-long-chain fatty acid condensing enzyme CUT1 (Very-long-chain fatty acid condensing enzyme (CUT1); 56079-54227).	0.228473	0.18066	0.602045	0.468753	0.687455
Os04g0121100|COMBINER_EST|Os04g0121100|8	Os04g0121100	Similar to OSIGBa0115D20.4 protein.	0.465769	0.148438	0.145983	0.122291	0.226544
Os04g0125600|COMBINER|AU075609|6			2.40887	2.85893	2.78329	3.73068	3.12796
Os04g0136500|COMBINER_EST|Os04g0136500|8	Os04g0136500	Similar to OSIGBa0147B06.1 protein.	1.91096	1.25072	1.31515	3.01209	5.57565
Os04g0137100|COMBINER_EST|CI126462|6	Os04g0137100	Similar to OSIGBa0147B06.7 protein.	0.210181	0.325408	0.478901	0.46419	0.641846
Os04g0149400|mRNA|AK062765|5'UTR+CDS	Os04g0149400	Hypothetical protein.	4.14342	9.69355	2.59822	1.19075	1.12456
Os04g0156200|COMBINER_EST|Os04g0156200|8	Os04g0156200	Hypothetical conserved gene.	1.25863	4.19962	4.18973	5.55926	4.25811
Os04g0162100|mRNA|AK069556|CDS+3'UTR	Os04g0162100	Similar to EMF protein.	5.93972	5.03702	1.45183	1.49805	0.983863
Os04g0164900|mRNA|D50602|CDS+3'UTR	Os04g0164900	Similar to Starch debranching enzyme.	0.667077	0.413025	0.29447	0.441	0.299354
Os04g0165000|mRNA|AK107984|CDS+3'UTR	Os04g0165000	Similar to Thaumatin-like protein 1 precursor.	0.243088	0.239747	1.29274	2.83969	3.89049
Os04g0175400|mRNA|AK107892|CDS+3'UTR	Os04g0175400	Conserved hypothetical protein.	115.788	60.4906	44.0536	4.5788	9.7929
Os04g0177300|mRNA|AK102094|CDS+3'UTR	Os04g0177300	DEAD-like helicase, N-terminal domain containing protein.	0.738043	0.12582	0.104663	0.298104	0.31242
Os04g0180400|mRNA|AK071546|CDS+3'UTR	Os04g0180400	Similar to Cytochrome P450 CYP99A1 (EC 1.14.-.-) (Fragment).	0.203223	0.614195	0.213107	1.25387	0.734236
Os04g0185100|mRNA|AK119406|CDS+3'UTR	Os04g0185100	DNA replication factor CDT1-like domain containing protein.	0.270851	0.0677201	0.163734	0.488797	0.334477
Os04g0185600|COMBINER_EST|CI179631|6	Os04g0185600	General substrate transporter domain containing protein.	20.6985	30.657	14.7618	10.2557	3.57676
Os04g0186400|mRNA|AF493789|CDS	Os04g0186400	Similar to Phosphate transporter 6.	3.69179	5.85028	2.21691	1.4527	0.997141
Os04g0186400|mRNA|AK063990|CDS+3'UTR	Os04g0186400	Similar to Phosphate transporter 6.	8.89776	18.3735	5.31603	2.02872	0.354133
Os04g0186400|mRNA|AK101380|CDS+3'UTR	Os04g0186400	Similar to Phosphate transporter 6.	4.57091	8.01312	2.46994	0.599872	0.267558
Os04g0194400|COMBINER_EST|Os04g0194400|8			1.71161	1.20967	1.26104	3.35707	5.88616
Os04g0196600|mRNA|AK121999|CDS+3'UTR	Os04g0196600	Glycosyltransferase AER61, uncharacterized domain containing protein.	0.821064	1.6955	4.50327	3.36952	6.67818
Os04g0208800|mRNA|AK120001|CDS+3'UTR	Os04g0208800	Conserved hypothetical protein.	2.03575	1.39465	1.81895	6.45799	5.78916
Os04g0209300|mRNA|AK120122|CDS+3'UTR	Os04g0209300	Similar to Glutathione-conjugate transporter AtMRP4.	0.809041	0.395792	0.294112	0.316663	0.390118
Os04g0211800|COMBINER|CI250750|6			1.81868	2.37369	2.05481	5.738	5.21483
Os04g0212200|COMBINER_EST|Os04g0212200|8	Os04g0212200	Similar to protein binding.	5.20729	31.6985	21.2725	1.4961	1.28099
Os04g0223000|mRNA|AK067177|CDS+3'UTR	Os04g0223000	Sec1-like protein family protein.	0.988238	0.472968	0.334271	0.207406	0.225782
Os04g0223300|mRNA|AY382617|CDS+3'UTR	Os04g0223300	Similar to Peroxisome type ascorbate peroxidase.	5.32963	9.83257	3.83349	1.25471	1.15282
Os04g0223500|mRNA|AK071801|CDS+3'UTR	Os04g0223500	Dimethylaniline monooxygenase, N-oxide-forming domain containing protein.	0.38778	0.180235	0.436085	4.52395	3.80896
Os04g0224000|mRNA|AK109448|CDS+3'UTR	Os04g0224000	Conserved hypothetical protein.	1.16598	1.16338	1.21306	4.17239	4.40738
Os04g0225100|mRNA|AK105234|CDS+3'UTR	Os04g0225100	3'-5' exonuclease domain containing protein.	0.437955	0.366961	0.730303	3.78521	3.83469
Os04g0227500|mRNA|AK059943|CDS+3'UTR	Os04g0227500	DSBA oxidoreductase family protein.	0.138622	0.294041	1.2178	0.978371	1.20553
Os04g0227500|mRNA|AK060052|CDS+3'UTR	Os04g0227500	DSBA oxidoreductase family protein.	0.172417	0.200534	0.92605	0.860879	1.19823
Os04g0227500|mRNA|AK104227|CDS+3'UTR	Os04g0227500	DSBA oxidoreductase family protein.	0.164319	0.129664	0.657241	0.642388	0.803865
Os04g0228100|mRNA|AK059410|CDS+3'UTR	Os04g0228100	Conserved hypothetical protein.	0.632429	0.167749	0.203026	0.0904928	0.232962
Os04g0234400|COMBINER|AU075609|6			2.41003	2.8882	2.79693	3.73043	3.16798
Os04g0247500|mRNA|AK066605|CDS+3'UTR	Os04g0247500	Conserved hypothetical protein.	0.698369	0.334861	0.283444	0.130725	0.169184
Os04g0252400|mRNA|AK119369|CDS+3'UTR	Os04g0252400	Similar to Sec1p-like protein 1 (Fragment).	1.7818	3.26939	2.98871	4.51048	2.77385
Os04g0257500|mRNA|AK107745|CDS+3'UTR	Os04g0257500	Similar to Transcription factor TSRF1.	0.215786	0.0601946	0.835174	3.7937	7.53423
Os04g0266400|mRNA|AK068202|CDS+3'UTR	Os04g0266400	Similar to AHM2 (Fragment).	1.3959	1.82431	2.1488	3.31619	3.84165
Os04g0266900|mRNA|AK069447|CDS+3'UTR	Os04g0266900	Transketolase C-terminal-like domain containing protein.	3.16375	3.59726	2.58462	2.00846	2.12572
Os04g0269600|mRNA|AK066445|CDS+3'UTR	Os04g0269600	Similar to cDNA clone:J023110G01, full insert sequence.	0.854385	0.156306	0.314195	0.263333	0.7389
Os04g0269600|mRNA|AK100640|CDS+3'UTR	Os04g0269600	Similar to Copper amine oxidase.	0.649764	0.230668	0.332261	0.407244	1.08767
Os04g0283800|mRNA|AK109869|CDS+3'UTR	Os04g0283800	Octicosapeptide/Phox/Bem1p domain containing protein.	0.535873	0.576059	7.91275	4.94837	12.658
Os04g0290400|mRNA|AK063164|CDS+3'UTR	Os04g0290400	Conserved hypothetical protein.	2.89542	3.63142	4.42767	6.17149	7.25397
Os04g0298700|COMBINER_EST|CI553559|2	Os04g0298700	Clp, N-terminal domain containing protein.	1.01799	1.03061	0.315804	0.324169	0.210274
Os04g0301500|mRNA|AB040744|CDS+3'UTR	Os04g0301500	Helix-loop-helix DNA-binding domain containing protein.	1.11195	3.93501	1.23073	0.135191	0.123739
Os04g0305500|COMBINER|AU075609|6			2.42384	2.83974	2.89019	3.96397	3.20015
Os04g0306400|mRNA|AK103443|CDS+3'UTR	Os04g0306400	Ribose 5-phosphate isomerase family protein.	1.03486	1.60071	2.02337	3.6604	3.35446
Os04g0310800|COMBINER_EST|CI093125|6	Os04g0310800	Similar to H0211A12.17 protein.	0.319508	0.202139	2.00015	2.61744	2.89748
Os04g0311300|COMBINER_EST|CI105466|6			1.97567	5.77086	4.61924	5.62809	3.72094
Os04g0320700|mRNA|AK105783|CDS+3'UTR	Os04g0320700	Similar to Glucosyltransferase (Fragment).	1.64496	1.67165	3.76837	1.92563	4.03725
Os04g0320700|mRNA|AK105966|CDS+3'UTR	Os04g0320700	Similar to Glucosyltransferase (Fragment).	1.85444	2.27206	5.81541	3.07482	6.80251
Os04g0320700|mRNA|AK119530|CDS+3'UTR	Os04g0320700	Similar to Glucosyltransferase (Fragment).	1.4148	2.16086	4.91254	2.25006	5.02037
Os04g0321100|COMBINER_EST|CI250997|6	Os04g0321100	Similar to H0107B07.6 protein.	2.29759	2.42749	5.91311	2.51943	5.44001
Os04g0325300|mRNA|AK071605|CDS+3'UTR	Os04g0325300	Hypothetical protein.	0.427034	0.289088	0.343646	0.223632	0.23581
Os04g0328900|COMBINER_EST|AU085941|6	Os04g0328900	Similar to OSIGBa0113K06.3 protein.	3.89117	2.67138	0.647582	0.216839	0.14675
Os04g0337500|mRNA|AK068652|CDS+3'UTR	Os04g0337500	Aldo/keto reductase family protein.	0.139315	0.101976	0.53457	0.315292	0.828125
Os04g0337500|mRNA|AK104524|CDS+3'UTR	Os04g0337500	Aldo/keto reductase family protein.	0.361986	0.107945	0.472896	0.31689	0.922004
Os04g0341100|COMBINER_EST|Os04g0341100|8	Os04g0341100	Similar to predicted protein.	1.3616	1.08869	1.55349	5.22132	7.53353
Os04g0344100|COMBINER_EST|CI430976|3	Os04g0344100	Similar to OSIGBa0106G08.3 protein.	0.262939	0.127284	3.21135	2.94152	3.81998
Os04g0350300|mRNA|AF210816|CDS+3'UTR	Os04g0350300	Similar to Phragmoplast-associated kinesin-related protein 1 (Fragment).	1.01358	0.360306	0.288731	0.263353	0.295338
Os04g0351200|COMBINER|CI168028|6			1.10675	1.06606	1.60045	3.9385	3.73285
Os04g0352400|mRNA|AF140495|5'UTR+CDS	Os04g0352400	Peptidyl-prolyl cis-trans isomerase, FKBP-type domain containing protein.	52.5605	57.9238	35.0983	13.6579	4.42977
Os04g0352400|mRNA|AK100844|CDS+3'UTR	Os04g0352400	Peptidyl-prolyl cis-trans isomerase, FKBP-type domain containing protein.	25.8522	29.2221	17.7157	9.6489	3.87444
Os04g0361500|COMBINER_EST|Os04g0361500|8	Os04g0361500	Similar to OSIGBa0111E13.1 protein.	2.21636	2.80998	3.38487	4.26313	4.81749
Os04g0372700|mRNA|AK062814|5'UTR+CDS	Os04g0372700	Similar to Quinone-oxidoreductase QR1 (Fragment).	2.51337	0.82285	0.316024	0.126309	0.325124
Os04g0375900|mRNA|AK101769|CDS+3'UTR	Os04g0375900	Kinesin, motor region domain containing protein.	1.06513	0.130435	0.14509	0.76665	0.540412
Os04g0380500|mRNA|AK064131|CDS+3'UTR	Os04g0380500	Conserved hypothetical protein.	0.521223	1.04606	1.66971	4.0444	3.67822
Os04g0381600|COMBINER_EST|C97371|7	Os04g0381600	GTPase EngC family protein.	9.21304	9.92087	4.94726	2.8002	2.20603
Os04g0382900|mRNA|AK062807|CDS+3'UTR	Os04g0382900	Conserved hypothetical protein.	0.226843	0.163171	0.604317	1.03256	2.20831
Os04g0383100|COMBINER|CI261569|6			0.108606	0.11872	0.530894	1.18004	1.99326
Os04g0384800|mRNA|AK062473|CDS+3'UTR	Os04g0384650	Non-protein coding transcript.	0.299841	0.147628	0.145184	0.0964201	0.149404
Os04g0384800|mRNA|AK063201|CDS+3'UTR	Os04g0384800	Conserved hypothetical protein.	0.262528	0.136027	0.134841	0.0677347	0.126568
Os04g0386700|COMBINER_EST|CI061748|0	Os04g0386700	Conserved hypothetical protein.	8.27022	12.1628	16.8626	9.95335	9.831
Os04g0387400|COMBINER_EST|Os04g0387400|8			5.82927	3.14445	2.3334	2.2179	2.39494
Os04g0387500|COMBINER_EST|CI243180|6	Os04g0387500	Similar to OSIGBa0075F02.2 protein.	1.81626	2.62689	2.90441	3.82098	3.70151
Os04g0389600|mRNA|AK072361|CDS+3'UTR	Os04g0389600	Conserved hypothetical protein.	2.75015	0.91269	2.01584	4.06021	3.46662
Os04g0390000|mRNA|AK068713|CDS+3'UTR	Os04g0390000	Similar to OSIGBa0096P03.7 protein.	3.11873	3.01491	1.97354	3.75223	1.3018
Os04g0392500|COMBINER|CI105436|6	Os04g0392500	Conserved hypothetical protein.	0.633433	0.444021	0.602897	0.196903	0.14816
Os04g0393300|mRNA|AK059881|CDS+3'UTR	Os04g0393300	Membrane-anchored ubiquitin-fold protein, HCG-1 domain containing protein.	1.1668	1.61718	1.95885	3.38395	3.75974
Os04g0394100|COMBINER_EST|CI438288|6	Os04g0394100	Similar to H0718E12.3 protein.	31.0703	10.3428	11.1937	1.15047	1.28688
Os04g0397400|mRNA|AK059476|CDS+3'UTR	Os04g0397400	Hypothetical protein.	4.36648	3.08862	2.38544	2.06176	1.73022
Os04g0398900|mRNA|AK107729|CDS+3'UTR	Os04g0398900	Conserved hypothetical protein.	0.358007	0.288683	0.547636	0.341692	0.279468
Os04g0400800|mRNA|AK110580|CDS+3'UTR	Os04g0400800	Heavy metal transport/detoxification protein domain containing protein.	0.127537	0.259053	0.283246	0.332098	0.305538
Os04g0401000|mRNA|AK070581|CDS+3'UTR	Os04g0401000	Pyricularia oryzae resistance 21 (susceptible allele).;Proline-rich protein.;Blast resistance.	0.49426	0.748968	2.21274	3.40422	3.74633
Os04g0401000|mRNA|AK072320|CDS+3'UTR	Os04g0401000	Pyricularia oryzae resistance 21 (susceptible allele).;Proline-rich protein.;Blast resistance.	0.473233	0.742527	2.29746	3.16018	3.73626
Os04g0401000|mRNA|AK106153|CDS+3'UTR	Os04g0401000	Heavy metal transport/detoxification protein domain containing protein.	0.453236	0.779626	2.35385	3.42709	3.85333
Os04g0401900|mRNA|AK105362|CDS+3'UTR	Os04g0401900	Conserved hypothetical protein.	0.506078	0.33604	0.336366	0.128147	0.203923
Os04g0405900|mRNA|AK066299|CDS+3'UTR	Os04g0405900	Hypothetical protein.	0.431606	1.16377	3.14025	7.50344	5.93881
Os04g0408600|mRNA|AK121434|CDS+3'UTR	Os04g0408600	Protein of unknown function DUF662 family protein.	0.201184	0.215581	0.595365	0.659422	0.872679
Os04g0408600|mRNA|AY224583|CDS	Os04g0408600	Protein of unknown function DUF662 family protein.	0.243245	0.246271	0.669608	0.781289	1.2669
Os04g0411700|COMBINER_EST|Os04g0411700|8			0.560317	0.390833	0.489227	0.20027	0.262407
Os04g0412000|COMBINER_EST|CI324658|0	Os04g0412000	Alpha/beta hydrolase fold-1 domain containing protein.	0.675367	0.409839	0.414901	0.26466	0.328527
Os04g0412300|mRNA|AK121151|CDS+3'UTR	Os04g0412300	Glycoside hydrolase, family 17 protein.	2.23361	1.69408	0.465655	0.116647	0.12739
Os04g0412500|mRNA|AK059525|CDS+3'UTR	Os04g0412500	Conserved hypothetical protein.	3.63746	4.8166	3.24238	1.52703	0.792336
Os04g0412800|mRNA|AK060508|CDS+3'UTR	Os04g0412800	Thioredoxin fold domain containing protein.	0.810024	0.180549	0.197425	0.0628211	0.194613
Os04g0419600|COMBINER_EST|AU075421|6	Os04g0419600	Histone H3.	1.05108	0.761962	0.376884	0.281506	0.188691
Os04g0421900|mRNA|AK066958|CDS+3'UTR	Os04g0421900	Conserved hypothetical protein.	1.60761	0.990398	0.462123	0.276647	0.309929
Os04g0422700|mRNA|AK111485|CDS+3'UTR	Os04g0422700	Conserved hypothetical protein.	0.847831	0.420119	0.280722	0.229884	0.380309
Os04g0423400|mRNA|AK061494|CDS+3'UTR	Os04g0423400	ABA/WDS induced protein family protein.	0.179059	0.139743	0.372505	0.538946	0.717377
Os04g0423400|mRNA|AK061578|CDS+3'UTR	Os04g0423400	Similar to OSIGBa0076I14.3 protein.	0.105969	0.0824722	0.327366	0.59607	0.700941
Os04g0423400|mRNA|AK103997|CDS+3'UTR	Os04g0423400	ABA/WDS induced protein family protein.	0.100112	0.0675609	0.298381	0.547395	0.63491
Os04g0423400|mRNA|AK104264|CDS+3'UTR	Os04g0423400	ABA/WDS induced protein family protein.	0.0942985	0.0826817	0.302991	0.540574	0.639178
Os04g0423400|mRNA|AK104594|CDS+3'UTR	Os04g0423400	ABA/WDS induced protein family protein.	0.104486	0.0852938	0.315766	0.530778	0.64131
Os04g0423400|mRNA|AK105960|CDS+3'UTR	Os04g0423400	ABA/WDS induced protein family protein.	0.0963827	0.108315	0.298021	0.542807	0.633638
Os04g0423400|mRNA|AK106218|CDS+3'UTR	Os04g0423400	ABA/WDS induced protein family protein.	0.200432	0.153201	0.457367	0.889973	1.03304
Os04g0429400|mRNA|AK108728|CDS+3'UTR	Os04g0429400	Helix-loop-helix DNA-binding domain containing protein.	0.288343	0.290412	0.375268	1.14883	0.840009
Os04g0430200|mRNA|AK070740|CDS+3'UTR	Os04g0430200	PLC-like phosphodiesterase, TIM beta/alpha-barrel domain domain containing protein.	1.05567	0.378111	0.355135	0.214037	0.307569
Os04g0442300|mRNA|AK072736|CDS+3'UTR	Os04g0442300	A-type response regulator 1.;Cytokinin signalling.	1.50314	0.902456	0.522676	0.29449	0.181337
Os04g0443200|mRNA|AK107991|CDS+3'UTR	Os04g0443200	Protein of unknown function DUF538 family protein.	1.61525	1.16875	1.70453	4.01253	3.34088
Os04g0444800|mRNA|AB126084|CDS+3'UTR	Os04g0444800	Ferric reductase-like transmembrane component family protein.	0.581414	0.952622	0.843818	0.179285	0.063657
Os04g0444800|mRNA|AK070312|CDS+3'UTR	Os04g0444800	Ferric reductase-like transmembrane component family protein.	0.559593	0.859186	0.82439	0.164014	0.0628353
Os04g0445100|mRNA|AK063700|CDS+3'UTR	Os04g0445100	Similar to 22.7 kDa class IV heat shock protein precursor.	19.1413	21.0808	19.0484	16.404	6.96743
Os04g0448500|COMBINER_EST|CI469008|0	Os04g0448500	Peptidase A1 domain containing protein.	0.0577707	0.0674478	1.94491	4.15137	7.08094
Os04g0450500|mRNA|AK058975|CDS+3'UTR	Os04g0450500	Conserved hypothetical protein.	0.434886	0.26485	0.309478	0.653201	0.688631
Os04g0452500|COMBINER_EST|Os04g0452500|8	Os04g0452500	Similar to H0505F09.1 protein.	7.54238	8.70607	3.32191	1.4894	1.10433
Os04g0453200|mRNA|AK062721|UTR	Os04g0453200	Similar to H0505F09.4 protein.	0.375401	0.127779	0.142779	0.265301	0.366097
Os04g0459500|mRNA|AF010582|5'UTR+CDS	Os04g0459500	Similar to GADPH (383 AA) (Fragment).	1.00159	1.03463	1.24925	0.171327	0.113135
Os04g0459500|mRNA|AK067817|CDS+3'UTR	Os04g0459500	Similar to H0219H12.1 protein.	0.717606	0.951832	1.02129	0.215038	0.164199
Os04g0459500|mRNA|AK071685|CDS+3'UTR	Os04g0459500	Similar to GADPH (383 AA) (Fragment).	0.722374	0.912402	1.05257	0.214526	0.161089
Os04g0459500|mRNA|AK103922|CDS+3'UTR	Os04g0459500	Similar to GADPH (383 AA) (Fragment).	0.748373	0.897676	1.07165	0.197665	0.147489
Os04g0459500|mRNA|AK103932|CDS+3'UTR	Os04g0459500	Similar to GADPH (383 AA) (Fragment).	0.759517	0.969599	1.06663	0.227657	0.171417
Os04g0459500|mRNA|AK103994|CDS+3'UTR	Os04g0459500	Similar to GADPH (383 AA) (Fragment).	0.726742	0.957883	1.00039	0.244834	0.182107
Os04g0459500|mRNA|AK104690|CDS+3'UTR	Os04g0459500	Similar to GADPH (383 AA) (Fragment).	0.734009	0.970057	1.02686	0.255285	0.18544
Os04g0459500|mRNA|AK119220|CDS+3'UTR	Os04g0459500	Similar to GADPH (383 AA) (Fragment).	0.827633	0.915986	1.21388	0.186616	0.141933
Os04g0459500|mRNA|AK119522|CDS+3'UTR	Os04g0459500	Similar to GADPH (383 AA) (Fragment).	0.715999	0.94538	1.13019	0.207409	0.156694
Os04g0460300|mRNA|AK106202|CDS+3'UTR	Os04g0460300	Amino acid transporter, transmembrane domain containing protein.	0.502533	0.30249	0.417102	0.247381	0.245323
Os04g0461400|mRNA|AK069265|CDS+3'UTR	Os04g0461400	Hypothetical gene.	4.27035	1.99979	1.68168	0.657033	0.281227
Os04g0461800|mRNA|AK106770|CDS+3'UTR	Os04g0461800	Actin-binding FH2 domain containing protein.	0.88461	0.591921	0.398494	0.199849	0.162664
Os04g0463300|mRNA|AK119417|CDS+3'UTR	Os04g0463300	Pentatricopeptide repeat containing protein.	1.20875	2.13902	3.78347	4.67783	2.92284
Os04g0466000|mRNA|AK107738|CDS+3'UTR	Os04g0466000	Conserved hypothetical protein.	0.51401	0.849401	1.65566	9.97813	8.97586
Os04g0469700|mRNA|AK068788|CDS+3'UTR	Os04g0469700	Conserved hypothetical protein.	0.529272	1.4858	2.2416	3.32376	3.79556
Os04g0469800|mRNA|AB158759|CDS+3'UTR	Os04g0469800	Cytochrome P450 724B1 (EC 1.14.-.-) (OsDWARF11) (Dwarf protein 11).	0.269026	0.29943	0.366995	0.33635	0.324086
Os04g0469800|mRNA|AK101419|CDS+3'UTR	Os04g0469800	Similar to OSIGBa0124N08.3 protein.	0.287699	0.321005	0.379231	0.334802	0.336762
Os04g0469800|mRNA|AK106528|CDS+3'UTR	Os04g0469800	Cytochrome P450 724B1 (EC 1.14.-.-) (OsDWARF11) (Dwarf protein 11).	0.275072	0.309681	0.350517	0.335723	0.321058
Os04g0470600|COMBINER_EST|CI068812|0	Os04g0470600	Myb-related transcription factor LBM2.	0.246482	0.148187	1.55218	1.62224	2.53407
Os04g0470700|mRNA|AK071044|CDS+3'UTR	Os04g0470700	Amino acid transporter, transmembrane family protein.	9.91466	12.8904	5.9939	1.8015	2.01864
Os04g0476400|mRNA|AK102076|CDS+3'UTR	Os04g0476400	Conserved hypothetical protein.	0.998968	0.355895	0.243381	0.288749	0.390065
Os04g0477300|mRNA|AK108082|CDS+3'UTR	Os04g0477300	No apical meristem(NAM) protein domain containing protein.	1.41184	1.87056	2.057	3.70254	4.29442
Os04g0486500|mRNA|AK111976|CDS+3'UTR	Os04g0486500	Similar to Mitotic spindle checkpoint protein MAD2.	1.14526	0.26006	0.241427	0.21463	0.454705
Os04g0487700|COMBINER_EST|Os04g0487700|8			1.01348	0.83478	0.902132	0.247183	0.170543
Os04g0490000|mRNA|AK108365|CDS+3'UTR	Os04g0490000	Similar to Glutamate synthase [NADH], chloroplast precursor (EC 1.4.1.14) (NADH- GOGAT).	14.1316	13.0514	14.4554	2.75955	1.67208
Os04g0490800|mRNA|AK066522|CDS+3'UTR	Os04g0490800	Haloacid dehalogenase-like hydrolase domain containing protein.	0.804149	1.24796	0.778999	0.258066	0.154966
Os04g0490800|mRNA|AK104854|CDS+3'UTR	Os04g0490800	Haloacid dehalogenase-like hydrolase domain containing protein.	0.769237	1.2128	0.73644	0.24904	0.135439
Os04g0491900|COMBINER_EST|Os04g0491900|8			7.52811	5.89439	2.99314	1.92321	1.77196
Os04g0494100|mRNA|AB096140|CDS+3'UTR	Os04g0494100	Similar to Chitinase.	1.81084	2.0067	2.67051	3.31633	6.29461
Os04g0494100|mRNA|AK071013|CDS+3'UTR	Os04g0494100	Similar to Chitinase.	3.43899	1.42673	5.26675	7.97836	15.9309
Os04g0494100|mRNA|AK104242|CDS+3'UTR	Os04g0494100	Similar to Chitinase.	2.72236	1.08902	5.44468	7.77891	14.48
Os04g0496300|mRNA|AK062810|CDS+3'UTR	Os04g0496300	Conserved hypothetical protein.	0.753825	0.191938	0.218273	0.0856612	0.30014
Os04g0497300|mRNA|AF257779|CDS+3'UTR	Os04g0497300	Protein of unknown function DUF1138 family protein.	0.819805	0.304924	0.466541	0.22394	0.122968
Os04g0497600|mRNA|AK059415|CDS+3'UTR	Os04g0497600	Lupus La protein family protein.	2.0507	3.21526	2.32417	3.09801	1.97449
Os04g0500600|mRNA|AK107850|CDS+3'UTR	Os04g0500600	Hypothetical protein.	3.55221	5.50823	2.95781	1.82359	1.24705
Os04g0503500|mRNA|AK099404|CDS+3'UTR	Os04g0503500	Leucine-rich repeat, cysteine-containing subtype containing protein.	1.12756	2.48995	3.22979	3.11268	2.5589
Os04g0503500|mRNA|AK101695|CDS+3'UTR	Os04g0503500	Leucine-rich repeat, cysteine-containing subtype containing protein.	1.16439	2.61414	3.23735	3.04403	2.45162
Os04g0503800|mRNA|AK121895|CDS+3'UTR	Os04g0503800	Similar to Trafficking protein particle complex protein 2 (Sedlin) (MBP-1 interacting protein-2A) (MIP-2A).	1.03352	0.637479	0.458024	0.286281	0.302809
Os04g0504200|mRNA|AK110863|CDS+3'UTR	Os04g0504200	Conserved hypothetical protein.	0.819629	0.164986	0.210939	0.0818363	0.242183
Os04g0505200|mRNA|AK061301|CDS+3'UTR	Os04g0505200	Leucine-rich repeat, plant specific containing protein.	0.265058	0.299518	0.396341	0.517757	0.635603
Os04g0505200|mRNA|AK066703|CDS+3'UTR	Os04g0505200	Similar to Protein binding protein.	0.268399	0.290635	0.382659	0.518247	0.644523
Os04g0505200|mRNA|AK104903|CDS+3'UTR	Os04g0505200	Similar to Protein binding protein.	0.247445	0.291099	0.391739	0.498461	0.614509
Os04g0509100|COMBINER_EST|Os04g0509100|8	Os04g0509100	Hypothetical conserved gene.	10.4337	5.63945	3.01234	1.45625	1.14
Os04g0511200|mRNA|X89891|CDS+3'UTR	Os04g0511200	EFA27 for EF hand, abscisic acid, 27kD.	10.4766	9.72065	54.8191	12.8102	15.5127
Os04g0512400|mRNA|AK103203|CDS+3'UTR	Os04g0512400	Similar to Midline 1 protein (Tripartite motif protein 18).	0.881128	0.543209	0.297427	0.388176	0.31174
Os04g0515400|COMBINER_EST|Os04g0515400|8	Os04g0515400	NTP pyrophosphohydrolase MazG, putative catalytic core domain containing protein.	0.638753	0.252006	0.355505	0.248407	0.326293
Os04g0518600|mRNA|AK063087|CDS+3'UTR	Os04g0518600	Hypothetical protein.	2.80784	3.42172	3.8245	3.36639	4.30745
Os04g0518800|mRNA|AK069293|CDS+3'UTR	Os04g0518800	Similar to Lysine decarboxylase-like protein.	0.288135	0.702379	0.330261	0.565648	0.319299
Os04g0519100|COMBINER_EST|Os04g0519100|8	Os04g0519100	Similar to OSIGBa0102I15.8 protein.	7.84239	7.21398	3.00931	2.23146	1.63364
Os04g0521700|mRNA|AK073622|CDS+3'UTR	Os04g0521700	Conserved hypothetical protein.	8.47894	5.34102	4.28163	2.33164	1.90341
Os04g0521900|mRNA|AK105173|CDS+3'UTR	Os04g0521900	Conserved hypothetical protein.	0.376445	0.425244	2.08736	5.24517	7.88844
Os04g0522800|mRNA|AK068328|CDS+3'UTR	Os04g0522800	Photosystem II oxygen evolving complex protein PsbQ family protein.	1.25648	0.511692	0.457132	0.309494	0.306464
Os04g0526300|COMBINER_EST|Os04g0526300|8	Os04g0526300	Sulfotransferase family protein.	0.312741	0.313761	0.34297	0.24416	0.232013
Os04g0526800|mRNA|AK061581|CDS+3'UTR	Os04g0526800	GRAM domain containing protein.	1.82213	1.22345	0.741198	0.242561	0.241715
Os04g0530100|mRNA|AK107184|CDS+3'UTR	Os04g0530100	Similar to Beta-expansin 1 precursor (AtEXPB1) (At-EXPB1) (Ath-ExpBeta-1.5).	0.613404	0.612933	0.493608	0.264606	0.328007
Os04g0530100|mRNA|AK109871|CDS+3'UTR	Os04g0530150	Non-protein coding transcript.	0.722267	0.667983	0.543247	0.227003	0.26526
Os04g0533500|mRNA|AK061426|CDS+3'UTR	Os04g0533500	Cytochrome b561 family protein.	0.765434	0.712827	0.353924	0.16036	0.200186
Os04g0533500|mRNA|AK069219|CDS+3'UTR	Os04g0533500	Cytochrome b561 family protein.	0.788762	0.841444	0.452731	0.179388	0.251318
Os04g0533900|COMBINER_EST|Os04g0533900|8	Os04g0533900	Heavy metal transport/detoxification protein domain containing protein.	3.67631	16.8697	4.14377	4.74798	6.91517
Os04g0535600|mRNA|AK099312|CDS+3'UTR	Os04g0535600	Similar to Beta-fructofuranosidase 1 precursor (EC 3.2.1.26) (Sucrose 1) (Invertase 1).	0.479458	0.258876	0.308461	0.558858	0.807621
Os04g0538000|mRNA|AK108550|CDS+3'UTR	Os04g0538000	Tetratricopeptide-like helical domain containing protein.	41.7237	25.1092	12.0813	3.08169	1.70865
Os04g0540600|mRNA|AF464932|CDS+3'UTR	Os04g0540600	Aldehyde dehydrogenase domain containing protein.	0.434879	0.285477	0.325559	0.345212	0.358056
Os04g0540600|mRNA|AK071169|CDS+3'UTR	Os04g0540600	Aldehyde dehydrogenase domain containing protein.	0.450747	0.293383	0.311186	0.32936	0.356479
Os04g0541700|mRNA|AK109177|CDS+3'UTR	Os04g0541700	Homeodomain-related domain containing protein.	3.97256	4.54224	3.67957	0.895036	1.17453
Os04g0541700|mRNA|AY224440|5'UTR+CDS	Os04g0541700	Homeodomain-related domain containing protein.	4.84522	5.76276	4.67828	0.802498	0.942876
Os04g0541700|mRNA|AY554030|CDS+3'UTR	Os04g0541700	Homeodomain-related domain containing protein.	3.09217	3.18952	2.55439	0.649303	0.831932
Os04g0543700|mRNA|AK106823|CDS+3'UTR	Os04g0543700	Similar to Serine proteinase (Fragment).	0.15586	0.350416	3.18208	1.99141	16.4045
Os04g0543700|mRNA|AY644644|CDS+3'UTR	Os04g0543700	Similar to Serine proteinase (Fragment).	0.146206	0.191926	1.89442	1.37807	7.1625
Os04g0543700|mRNA|AY683198|CDS+3'UTR	Os04g0543700	Similar to Serine proteinase (Fragment).	0.159064	0.191043	1.9471	1.69423	7.9927
Os04g0548500|mRNA|AK063565|UTR	Os04g0548500	Conserved hypothetical protein.	20.9557	24.5756	12.2893	2.58138	1.98069
Os04g0551500|mRNA|AK068749|CDS+3'UTR	Os04g0551500	SBP domain containing protein.	1.49217	1.20324	1.18734	3.12897	3.57258
Os04g0553500|mRNA|AK067182|CDS+3'UTR	Os04g0553500	Pectin lyase fold domain containing protein.	0.60065	0.207282	0.226942	0.181136	0.28376
Os04g0555600|mRNA|AK100443|5'UTR+CDS	Os04g0555600	Concanavalin A-like lectin/glucanase domain containing protein.	1.4729	1.10779	1.45763	19.7344	40.4448
Os04g0556100|mRNA|AK109622|CDS+3'UTR	Os04g0556100	Hypothetical protein.	1.71641	2.68133	1.59492	4.01183	3.85689
Os04g0560500|COMBINER_EST|CI480476|3	Os04g0560500	Hypothetical conserved gene.	4.93695	4.78415	2.5798	2.71324	2.13237
Os04g0561200|mRNA|AK107862|CDS+3'UTR	Os04g0561200	Cellular retinaldehyde-binding/triple function, C-terminal domain containing protein.	2.6313	10.8805	12.4111	7.10098	4.43595
Os04g0563900|COMBINER_EST|CI223070|6	Os04g0563900	Similar to H0409D10.5 protein.	2.97339	3.76224	3.41721	1.08225	0.861914
Os04g0568600|COMBINER_EST|Os04g0568600|8	Os04g0568600	Similar to 6-phospho-3-hexuloisomerase.	5.89848	3.43363	1.98229	1.41961	1.45787
Os04g0568700|mRNA|AY344483|CDS+3'UTR	Os04g0568700	Similar to Heat stress transcription factor Spl7 (Heat shock transcription factor) (Heat shock factor RHSF10).	21.3861	4.19208	3.41018	0.708788	0.954778
Os04g0570600|mRNA|AK106747|CDS+3'UTR	Os04g0570600	Cytochrome P450 family protein.	0.137714	0.129226	1.83599	1.61168	4.99813
Os04g0571600|COMBINER_EST|Os04g0571600|8	Os04g0571600	Multi antimicrobial extrusion protein MatE family protein.	1.04612	1.09807	1.90157	5.20254	6.82872
Os04g0573100|mRNA|AK106787|CDS+3'UTR	Os04g0573100	Similar to Mandelonitrile lyase-like protein.	0.144473	0.196173	0.3409	0.68308	1.06112
Os04g0573200|mRNA|AK065277|CDS+3'UTR	Os04g0573200	Similar to OSIGBa0147H17.7 protein.	9.73874	15.9377	13.1612	4.946	3.50817
Os04g0573200|mRNA|AK120348|CDS+3'UTR	Os04g0573200	Superoxide dismutase, copper/zinc binding domain containing protein.	9.94443	16.2039	14.5467	4.83895	3.67892
Os04g0573900|mRNA|AK061650|CDS+3'UTR	Os04g0573900	Similar to cytochrome P450.	0.564926	0.730915	1.74904	3.63765	3.38278
Os04g0573900|mRNA|AK119612|CDS+3'UTR	Os04g0573900	Similar to Cytochrome P450-like protein.	0.63663	0.713206	1.7172	4.28869	3.80198
Os04g0573900|mRNA|AK120901|CDS+3'UTR	Os04g0573900	Similar to Cytochrome P450-like protein.	0.502598	0.786671	1.81838	3.15299	3.27145
Os04g0576800|mRNA|AK073542|CDS+3'UTR	Os04g0576800	3-oxo-5-alpha-steroid 4-dehydrogenase, C-terminal domain containing protein.	3.09461	3.61487	2.06677	1.5541	0.978095
Os04g0576800|mRNA|AK099759|CDS+3'UTR	Os04g0576800	Similar to predicted protein.	3.13511	4.00536	2.20443	1.52941	0.967043
Os04g0576800|mRNA|AK104042|CDS+3'UTR	Os04g0576800	3-oxo-5-alpha-steroid 4-dehydrogenase, C-terminal domain containing protein.	3.13025	3.94508	2.18617	1.54643	0.994998
Os04g0578400|mRNA|AK060559|CDS+3'UTR	Os04g0578400	Similar to Beta-ring hydroxylase (Fragment).	1.01419	0.970576	1.05805	0.30666	0.154165
Os04g0581100|mRNA|AK100853|CDS+3'UTR	Os04g0581100	2OG-Fe(II) oxygenase domain containing protein.	0.678072	1.94147	0.299011	0.753414	0.239915
Os04g0581600|mRNA|AK101692|CDS+3'UTR	Os04g0581600	Similar to UDP-glucose dehydrogenase.	0.211217	0.889311	1.21339	3.2636	3.35342
Os04g0581700|mRNA|AK063676|CDS+3'UTR	Os04g0581700	Similar to predicted protein.	5.42867	6.51535	8.04382	2.25962	2.2047
Os04g0583900|mRNA|AK101209|CDS+3'UTR	Os04g0583900	Similar to LHY protein.	9.73503	4.98772	2.72723	0.235941	0.178004
Os04g0587400|mRNA|AK071680|CDS+3'UTR	Os04g0587400	Protein of unknown function DUF250 domain containing protein.	1.14017	2.40106	5.05148	5.87584	8.1508
Os04g0589700|mRNA|AK070506|CDS+3'UTR	Os04g0589700	Zinc finger, RING/FYVE/PHD-type domain containing protein.	1.83789	1.66552	1.85818	7.77888	4.6613
Os04g0590800|mRNA|AK062895|CDS+3'UTR	Os04g0590800	Hypothetical protein.	0.320846	0.318636	0.172052	0.132725	0.188717
Os04g0591300|mRNA|AK105120|CDS+3'UTR	Os04g0591300	Conserved hypothetical protein.	4.28248	3.05428	2.47796	1.92359	2.12454
Os04g0593400|COMBINER_EST|CI422315|0	Os04g0593400	Bet v I allergen family protein.	0.747616	0.832441	0.359089	0.104296	0.277609
Os04g0595000|mRNA|AK106907|CDS+3'UTR	Os04g0596200	Peptidase A1 domain containing protein.	0.324508	0.271393	0.585196	0.899376	0.718737
Os04g0597900|COMBINER|CI414123|x	Os04g0597900	Similar to OSJNba0093F12.13 protein.	0.721026	0.191433	0.246021	0.141841	0.316471
Os04g0599800|mRNA|AK103675|CDS+3'UTR	Os04g0599800	WD40 repeat-like domain containing protein.	1.01421	0.305324	0.241181	0.362924	0.504364
Os04g0600000|mRNA|AK106400|CDS+3'UTR	Os04g0600000	Similar to Transfactor-like protein.	1.77828	2.02541	3.19705	2.07066	3.08146
Os04g0600200|mRNA|AB004864|CDS+3'UTR	Os04g0600200	Alternative oxidase 1a.	1.17301	2.88633	3.50728	3.29135	4.49841
Os04g0600200|mRNA|AB007452|CDS+3'UTR	Os04g0600200	Alternative oxidase 1a.	1.0008	2.33739	3.20815	2.97262	3.55728
Os04g0600200|mRNA|AK064040|CDS+3'UTR	Os04g0600200	Alternative oxidase 1a.	1.19603	2.99695	3.31463	3.39691	4.54638
Os04g0600300|mRNA|AB004865|CDS+3'UTR	Os04g0600300	Alternative oxidase 1b.	311.587	528.527	83.414	22.272	26.189
Os04g0600300|mRNA|AK107376|CDS+3'UTR	Os04g0600300	Alternative oxidase 1b.	304.759	516.047	81.8483	22.4241	25.3459
Os04g0601800|mRNA|AK062641|CDS+3'UTR	Os04g0601800	Similar to Plastid protein.	0.991382	1.13965	1.76014	4.9094	3.51829
Os04g0602000|COMBINER_EST|CI207644|6	Os04g0602000	Similar to B0403H10-OSIGBa0105A11.14 protein.	1.1465	1.53957	2.08764	5.5957	3.5284
Os04g0602100|mRNA|AK069838|CDS+3'UTR	Os04g0602100	Plant ascorbate peroxidase domain containing protein.	0.509194	0.436061	0.362153	0.139659	0.104902
Os04g0602100|mRNA|AK121197|5'UTR+CDS	Os04g0602100	Similar to B0403H10-OSIGBa0105A11.15 protein.	0.831631	0.682824	0.637215	0.22488	0.189511
Os04g0602500|mRNA|AK058634|CDS+3'UTR	Os04g0602500	Similar to B0403H10-OSIGBa0105A11.19 protein.	0.947891	0.855319	0.656059	0.208395	0.262195
Os04g0602500|mRNA|AK073958|CDS+3'UTR	Os04g0602500	Similar to Pectin acetylesterase.	0.864812	0.869955	0.691131	0.262072	0.310609
Os04g0603900|mRNA|AK099651|CDS+3'UTR	Os04g0603900	Conserved hypothetical protein.	0.418704	1.42288	2.52845	4.83651	6.30893
Os04g0607200|mRNA|AK071573|UTR	Os04g0607200	Hypothetical conserved gene.	3.33618	3.66187	2.07896	1.72878	1.48789
Os04g0609300|COMBINER_EST|CI420817|6	Os04g0609300	Transferase family protein.	1.61127	0.135771	1.21595	0.303235	0.902749
Os04g0610600|mRNA|AK073109|CDS+3'UTR	Os04g0610600	Similar to Cor14b protein precursor.	12.7992	10.7145	5.50236	1.18212	1.93086
Os04g0612300|COMBINER_EST|Os04g0612300|8	Os04g0612300	Similar to Cell wall-plasma membrane linker protein homolog.	0.554586	0.414888	0.574304	0.245567	0.294363
Os04g0614500|mRNA|AK100259|CDS+3'UTR	Os04g0614500	Pyridoxal phosphate-dependent transferase, major region, subdomain 1 domain containing protein.	0.242738	0.142818	0.455297	0.830683	0.65242
Os04g0615100|mRNA|AK069739|CDS+3'UTR	Os04g0615100	Similar to Lecithine cholesterol acyltransferase-like protein.	3.25644	3.38253	2.41653	2.03735	1.88691
Os04g0615200|mRNA|AK063824|CDS+3'UTR	Os04g0615200	Conserved hypothetical protein.	1.11571	6.78767	3.6394	1.53676	1.64378
Os04g0615200|mRNA|AK101227|CDS+3'UTR	Os04g0615200	Conserved hypothetical protein.	1.11334	7.19431	3.70635	1.42393	1.72618
Os04g0615600|mRNA|AK111092|CDS+3'UTR	Os04g0615600	Conserved hypothetical protein.	1.67799	3.64419	8.34963	5.54151	3.59274
Os04g0616300|COMBINER_EST|CI435775|0	Os04g0616300	Similar to H0525G02.10 protein.	0.68634	0.814695	1.142	3.07902	6.24459
Os04g0621800|mRNA|AK063017|CDS+3'UTR	Os04g0621800	Conserved hypothetical protein.	0.610259	0.368622	0.311834	0.287069	0.34903
Os04g0624600|mRNA|AK059368|CDS+3'UTR	Os04g0624600	Similar to H0215F08.14 protein.	3.87967	5.75215	4.02215	1.71404	0.691029
Os04g0624600|mRNA|AK122098|CDS+3'UTR	Os04g0624600	Similar to Starch synthase DULL1 (Fragment).	3.46978	5.46722	3.95426	1.57212	0.651708
Os04g0625200|COMBINER_EST|CI035515|6	Os04g0625200	Phospholipid/glycerol acyltransferase family protein.	45.6579	56.5883	19.4189	2.65111	1.6093
Os04g0625800|mRNA|AK120834|CDS+3'UTR	Os04g0625800	Similar to RNA Binding Protein 45.	0.8915	0.334867	0.331048	0.25768	0.306815
Os04g0626500|mRNA|AK069923|CDS+3'UTR	Os04g0626500	Similar to Disease resistance protein RGA2 (RGA2-blb) (Blight resistance protein RPI).	34.9048	33.5895	9.8491	1.89121	1.21999
Os04g0627900|mRNA|AK108443|CDS+3'UTR	Os04g0627900	Translation initiation factor SUI1 domain containing protein.	0.747969	1.59767	1.86513	3.04542	3.81166
Os04g0628200|mRNA|AK068148|CDS+3'UTR	Os04g0628200	Haem peroxidase, plant/fungal/bacterial family protein.	1.21272	1.1727	1.18958	3.94482	5.0833
Os04g0629600|mRNA|AK099596|UTR	Os04g0629600	Hypothetical gene.	0.511565	2.13359	2.36345	4.24426	3.2884
Os04g0630600|COMBINER_EST|CI148206|6	Os04g0630600	Similar to H0323C08.16 protein.	0.333464	2.35582	7.9038	24.9583	21.1646
Os04g0630800|mRNA|AK067411|CDS+3'UTR	Os04g0630800	Similar to Anthocyanidin reductase.	0.447457	2.52142	8.97798	14.6509	14.4554
Os04g0631000|COMBINER_EST|Os04g0631000|8	Os04g0631000	Similar to H0105C05.4 protein.	0.851816	2.28275	7.75184	8.3246	7.5917
Os04g0634400|COMBINER_EST|Os04g0634400|8	Os04g0634400	Similar to H0315F07.5 protein.	4.20613	11.9739	5.01138	3.85464	2.14786
Os04g0634800|mRNA|AK107772|CDS+3'UTR	Os04g0634800	Conserved hypothetical protein.	4.7388	6.28632	17.8245	4.85768	6.55914
Os04g0635000|mRNA|AK062619|CDS+3'UTR	Os04g0635000	Conserved hypothetical protein.	3.20913	5.52907	9.42074	0.630063	0.38344
Os04g0635400|COMBINER_EST|CI037812|2	Os04g0635400	Conserved hypothetical protein.	4.50279	3.9367	4.00065	1.45952	1.13929
Os04g0635500|mRNA|AK069933|CDS+3'UTR	Os04g0635500	Similar to Wound induced protein (Fragment).	6.51959	5.27271	6.83825	1.63292	1.31014
Os04g0635500|mRNA|AK119684|CDS+3'UTR	Os04g0635500	Similar to Wound induced protein (Fragment).	6.2069	4.76351	6.71208	1.63046	1.2778
Os04g0636400|mRNA|AK061848|CDS+3'UTR	Os04g0636400	Similar to Senescence-associated protein 6.	0.268767	0.303318	0.522966	0.810883	0.62384
Os04g0636400|mRNA|AK099573|CDS+3'UTR	Os04g0636400	Similar to Senescence-associated protein 6.	0.279665	0.331743	0.598396	0.832618	0.702142
Os04g0637500|mRNA|AK108202|CDS+3'UTR	Os04g0637500	Mitochodrial transcription termination factor-related family protein.	0.636477	0.321451	0.309704	0.327738	0.255674
Os04g0638700|mRNA|AK062886|CDS+3'UTR	Os04g0638700	Conserved hypothetical protein.	2.45256	4.11029	3.73674	2.37936	2.13115
Os04g0640600|mRNA|AK067948|CDS+3'UTR	Os04g0640600	Similar to OSIGBa0138H21-OSIGBa0138E01.13 protein.	0.227504	0.26603	0.730661	1.43259	2.87874
Os04g0640600|mRNA|AK070318|CDS+3'UTR	Os04g0640600	Shikimate kinase.	0.195797	0.257984	0.75307	1.2076	2.54168
Os04g0641400|mRNA|AK059892|CDS+3'UTR	Os04g0641400	Similar to H0423H10.3 protein.	0.427082	0.233468	0.190975	0.162339	0.140095
Os04g0643100|mRNA|AK106989|CDS+3'UTR	Os04g0643100	Similar to Vacuolar ATP synthase subunit D (EC 3.6.3.14) (V-ATPase D subunit) (Vacuolar proton pump D subunit).	1.63189	0.768712	0.381805	0.319716	0.247705
Os04g0644600|mRNA|AJ417521|CDS+3'UTR	Os04g0644600	Epoxide hydrolase family protein.	5.66981	4.23672	2.69743	1.14915	0.606779
Os04g0644600|mRNA|AK099966|CDS+3'UTR	Os04g0644600	Epoxide hydrolase family protein.	5.81211	4.41751	2.60949	1.10847	0.650978
Os04g0644600|mRNA|AK105846|CDS+3'UTR	Os04g0644600	Epoxide hydrolase family protein.	3.97543	23.8762	23.1391	7.93015	3.12021
Os04g0645700|mRNA|AK100707|CDS+3'UTR	Os04g0645700	Hypothetical protein.	5.28088	7.14944	5.37262	4.01583	2.72166
Os04g0647900|mRNA|AK068809|CDS+3'UTR	Os04g0647900	Leucine-rich repeat, N-terminal domain containing protein.	1.1286	1.86657	0.735135	0.152265	0.121174
Os04g0650700|mRNA|AK058733|CDS+3'UTR	Os04g0650700	Similar to OSIGBa0113E10.3 protein.	0.88623	0.350705	0.250738	0.169591	0.215481
Os04g0650700|mRNA|AK121820|CDS+3'UTR	Os04g0650700	Similar to L-asparaginase (L-asparagine amidohydrolase).	1.05029	0.398319	0.304578	0.170001	0.242361
Os04g0656800|mRNA|AK058886|CDS+3'UTR	Os04g0656800	Similar to Peroxidase precursor (EC 1.11.1.7).	0.948659	0.532764	0.291609	0.116701	0.172013
Os04g0658000|mRNA|AK068928|CDS+3'UTR	Os04g0658000	Similar to OSIGBa0132E09-OSIGBa0108L24.1 protein.	0.515767	0.535824	0.305634	0.354552	0.320664
Os04g0658200|COMBINER|CI452886|0	Os04g0658200	Conserved hypothetical protein.	0.69324	1.10814	4.76384	2.34771	5.06553
Os04g0659000|mRNA|AK063095|CDS+3'UTR	Os04g0659000	Conserved hypothetical protein.	0.482179	0.376251	0.20923	0.118628	0.0910553
Os04g0659300|mRNA|AK111969|CDS+3'UTR	Os04g0659300	Protein of unknown function DUF26 domain containing protein.	0.688366	0.275136	30.8506	18.3061	13.3507
Os04g0659300|mRNA|AY303697|CDS	Os04g0659300	Protein of unknown function DUF26 domain containing protein.	0.515371	0.744052	8.74784	3.14648	2.77149
Os04g0662400|mRNA|AK108652|CDS+3'UTR	Os04g0662400	Auxin responsive SAUR protein family protein.	0.879236	1.5888	1.56727	0.274437	0.276917
Os04g0667600|mRNA|AK068657|CDS+3'UTR	Os04g0667600	Heavy metal transport/detoxification protein domain containing protein.	4.01463	3.19712	1.55911	1.20747	1.8202
Os04g0676100|COMBINER_EST|CI211634|6	Os04g0676100	Similar to Thioredoxin X, chloroplast precursor.	4.81898	4.09126	3.27208	1.8189	1.45815
Os04g0678400|mRNA|AK107524|CDS+3'UTR	Os04g0678400	Zinc finger, Dof-type domain containing protein.	4.1055	3.94997	2.32492	1.02752	0.690142
Os04g0678700|mRNA|AK065236|CDS+3'UTR	Os04g0678700	Similar to Protochlorophyllide reductase (EC 1.3.1.33) (PCR) (NADPH- protochlorophyllide oxidoreductase) (POR) (Fragment).	0.240513	0.407191	0.744907	0.19939	0.0983227
Os04g0678700|mRNA|AK103940|CDS+3'UTR	Os04g0678700	Similar to Protochlorophyllide reductase (EC 1.3.1.33) (PCR) (NADPH- protochlorophyllide oxidoreductase) (POR) (Fragment).	0.210928	0.418214	0.726452	0.180505	0.0893174
Os04g0678700|mRNA|AK103943|CDS+3'UTR	Os04g0678700	Similar to Protochlorophyllide reductase (EC 1.3.1.33) (PCR) (NADPH- protochlorophyllide oxidoreductase) (POR) (Fragment).	0.208255	0.389581	0.733265	0.176852	0.0855041
Os04g0678700|mRNA|AK104855|CDS+3'UTR	Os04g0678700	Similar to Protochlorophyllide reductase (EC 1.3.1.33) (PCR) (NADPH- protochlorophyllide oxidoreductase) (POR) (Fragment).	0.234238	0.402203	0.753461	0.190969	0.0912523
Os04g0679400|mRNA|AK065314|CDS+3'UTR	Os04g0679400	Similar to Ripening-associated protein (Fragment).	0.707385	2.55931	3.32197	2.84195	3.08877
Os04g0679400|mRNA|AK068608|CDS+3'UTR	Os04g0679400	Similar to H0801D08.15 protein.	2.61343	5.12857	4.99164	2.3289	1.9074
Os04g0679400|mRNA|AK099009|CDS+3'UTR	Os04g0679400	Similar to Ripening-associated protein (Fragment).	0.778891	2.71262	3.17427	2.97523	3.07112
Os04g0679400|mRNA|AK099368|CDS+3'UTR	Os04g0679400	Similar to Ripening-associated protein (Fragment).	0.764877	2.63665	3.52352	3.1012	2.9743
Os04g0679400|mRNA|AK099653|CDS+3'UTR	Os04g0679400	Similar to Ripening-associated protein (Fragment).	0.73388	2.69891	3.57534	3.0931	3.26803
Os04g0679400|mRNA|AK119666|CDS+3'UTR	Os04g0679400	Similar to Ripening-associated protein (Fragment).	0.718681	2.11427	3.30331	2.95155	3.04964
Os04g0679400|mRNA|AK121152|CDS+3'UTR	Os04g0679400	Similar to Ripening-associated protein (Fragment).	0.737421	2.69537	3.61423	2.97538	3.05273
Os04g0679500|COMBINER|CI054082|6			0.98234	3.89025	4.94302	2.73346	2.33541
Os04g0684100|mRNA|AK060126|UTR	Os04g0684100	Hypothetical conserved gene.	0.523473	0.548052	0.194069	0.269051	0.579209
Os04g0684800|mRNA|AK058755|UTR	Os04g0684800	Non-protein coding transcript.	0.708224	1.17487	1.87672	3.1832	4.34886
Os04g0685500|mRNA|AK073436|CDS+3'UTR	Os04g0685500	Exo70 exocyst complex subunit domain containing protein.	1.26938	1.65561	2.06414	3.5493	3.49082
Os04g0687200|mRNA|AK099969|CDS+3'UTR	Os04g0687150	Conserved hypothetical protein.	0.778298	0.365467	0.337966	0.233622	0.313062
Os04g0687800|mRNA|AK107360|CDS+3'UTR	Os04g0687800	Protein of unknown function DUF6, transmembrane domain containing protein.	0.089413	0.138826	0.34515	0.430184	0.496496
Os04g0689700|mRNA|AK066225|CDS+3'UTR	Os04g0689700	RNA recognition motif, RNP-1 domain containing protein.	0.365338	0.327123	0.187792	0.272578	0.196422
Os04g0690100|mRNA|AK099856|CDS+3'UTR	Os04g0690100	Zinc finger, C2H2-type domain containing protein.	0.441859	0.473568	0.372029	0.285249	0.326078
Os04g0692600|mRNA|AK070001|5'UTR+CDS	Os04g0692600	Hypothetical conserved gene.	1.2449	1.06432	0.974961	0.187819	0.112483
Os04g0692600|mRNA|AK105888|CDS+3'UTR	Os04g0692600	Conserved hypothetical protein.	1.03375	1.03384	0.901479	0.204176	0.128268
Os04g0692600|mRNA|AK105982|CDS+3'UTR	Os04g0692600	Conserved hypothetical protein.	0.981581	0.910155	0.849893	0.186752	0.117521
Os05g0102000|mRNA|AK064690|CDS+3'UTR	Os05g0102000	SAM dependent carboxyl methyltransferase family protein.	0.295952	0.765373	0.60735	0.161348	0.104735
Os05g0103400|mRNA|AK066339|CDS+3'UTR	Os05g0103400	Conserved hypothetical protein.	0.241024	0.255842	0.760927	0.885997	1.3436
Os05g0103600|mRNA|AK102584|CDS+3'UTR	Os05g0103600	Similar to Ankyrin-like protein.	8.11697	5.00319	1.83389	1.19426	0.896596
Os05g0108700|COMBINER|CI254462|6			108.289	130.4	50.943	31.5932	9.11932
Os05g0110300|mRNA|AK067116|CDS+3'UTR	Os05g0110300	NAD(P)-binding domain containing protein.	0.960089	0.433487	0.26051	0.191915	0.228604
Os05g0111000|mRNA|AK073598|CDS+3'UTR	Os05g0111000	Similar to Gag polyprotein [Contains: Core protein p15 (Matrix protein); Core protein p24; Core protein p12].	5.625	5.05868	2.52713	2.0276	1.22721
Os05g0111200|mRNA|AK101693|CDS+3'UTR	Os05g0111200	Similar to Amino acid selective channel protein.	2.98214	4.9987	4.16822	3.26561	1.56379
Os05g0112000|mRNA|AK105623|CDS+3'UTR	Os05g0112000	Ankyrin domain containing protein.	0.60765	0.730078	1.21632	3.3505	3.92967
Os05g0112800|mRNA|AK108350|CDS+3'UTR	Os05g0112800	Protein of unknown function DUF26 domain containing protein.	1.47649	2.5653	2.93289	3.57406	3.62902
Os05g0113900|mRNA|AK074018|CDS+3'UTR	Os05g0113900	Similar to Histone H2A.	0.777965	0.591247	0.332627	0.131442	0.0902366
Os05g0115600|mRNA|AK063589|CDS+3'UTR	Os05g0115600	Protein of unknown function DUF674 family protein.	0.615383	0.319495	0.244285	0.166536	0.356758
Os05g0122500|COMBINER_EST|Os05g0122500|8			1.05211	0.405734	0.241862	0.127961	0.129194
Os05g0122700|COMBINER_EST|CI441278|0	Os05g0122700	Similar to Low-temperature induced protein lt101.2.	3.10776	6.41763	8.23122	5.03559	7.14319
Os05g0125500|mRNA|AK066314|CDS+3'UTR	Os05g0125500	Similar to Isovaleryl-CoA dehydrogenase, mitochondrial precursor (EC 1.3.99.10) (IVD).	0.675538	1.62327	2.35855	3.82249	3.3496
Os05g0128100|mRNA|AK120934|CDS+3'UTR	Os05g0128100	Conserved hypothetical protein.	0.670978	0.740736	1.61194	3.10863	4.13048
Os05g0129900|mRNA|AK060436|CDS+3'UTR	Os05g0129900	Tetratricopeptide-like helical domain containing protein.	9.69264	13.3868	9.57505	5.54108	3.49879
Os05g0129900|mRNA|AK102515|CDS+3'UTR	Os05g0129900	Tetratricopeptide-like helical domain containing protein.	9.61568	15.2378	9.53439	5.28798	3.51402
Os05g0131900|mRNA|AK061877|CDS+3'UTR	Os05g0131900	Hypothetical protein.	3.98953	3.81524	2.75286	1.72434	1.2433
Os05g0131900|mRNA|AK065049|CDS+3'UTR	Os05g0131900	Hypothetical conserved gene.	4.35629	4.89303	3.22244	2.18325	1.64696
Os05g0135500|mRNA|AK060998|CDS+3'UTR	Os05g0135500	Haem peroxidase family protein.	0.161617	0.10661	0.471442	1.24423	3.00118
Os05g0135500|mRNA|AK061553|CDS+3'UTR	Os05g0135500	Haem peroxidase family protein.	0.23051	0.109661	0.504278	0.968938	2.16639
Os05g0135500|mRNA|AK104219|CDS+3'UTR	Os05g0135500	Haem peroxidase family protein.	0.133917	0.0548672	0.438188	1.16959	2.89875
Os05g0135500|mRNA|AK104300|CDS+3'UTR	Os05g0135500	Haem peroxidase family protein.	0.130324	0.0818454	0.405441	1.23574	2.90304
Os05g0135500|mRNA|AK104641|CDS+3'UTR	Os05g0135500	Haem peroxidase family protein.	0.0970045	0.0635399	0.354243	1.38324	3.08089
Os05g0135500|mRNA|AK106200|CDS+3'UTR	Os05g0135500	Haem peroxidase family protein.	0.126163	0.0534462	0.399083	1.07719	2.61353
Os05g0135500|mRNA|AK120246|CDS+3'UTR	Os05g0135500	Haem peroxidase family protein.	0.135918	0.0577347	0.457125	1.16702	2.65692
Os05g0135900|mRNA|AK105117|CDS+3'UTR	Os05g0135900	Spectrin repeat containing protein.	0.844514	0.360752	0.235732	0.241452	0.202306
Os05g0136200|mRNA|AK059282|CDS+3'UTR	Os05g0136200	Serine/threonine protein kinase domain containing protein.	3.18817	3.21052	2.10182	1.35246	0.948301
Os05g0137400|mRNA|AK065206|CDS+3'UTR	Os05g0137400	Similar to Aspartic protease precursor.	2.08215	4.13375	3.52315	3.40337	2.47548
Os05g0137700|COMBINER_EST|Os05g0137700|8	Os05g0137700	Thioesterase superfamily domain containing protein.	0.178783	0.169996	0.778914	0.990567	2.07335
Os05g0138300|mRNA|AB027607|CDS+3'UTR	Os05g0138300	Hydrophobic protein LTI6B (Low temperature-induced protein 6B).	1.27536	2.75958	3.54382	2.76554	4.43929
Os05g0138300|mRNA|AF503582|UTR	Os05g0138300	Hydrophobic protein LTI6B (Low temperature-induced protein 6B).	1.25279	2.75299	3.38896	3.36406	4.95901
Os05g0138300|mRNA|AF503583|CDS+3'UTR	Os05g0138300	Hydrophobic protein LTI6B (Low temperature-induced protein 6B).	1.30896	2.91317	3.42376	2.52335	3.3313
Os05g0138300|mRNA|AK099873|CDS+3'UTR	Os05g0138300	Similar to ICT protein (Fragment).	2.29739	3.30515	3.81311	3.8798	6.35159
Os05g0138300|mRNA|AK119249|CDS+3'UTR	Os05g0138300	Hydrophobic protein LTI6B (Low temperature-induced protein 6B).	1.24963	2.73657	3.54849	2.71825	4.49722
Os05g0138300|mRNA|AY554051|CDS+3'UTR	Os05g0138300	Hydrophobic protein LTI6B (Low temperature-induced protein 6B).	1.31803	2.71808	3.35526	2.6802	4.08903
Os05g0138300|mRNA|AY607690|CDS+3'UTR	Os05g0138300	Hydrophobic protein LTI6B (Low temperature-induced protein 6B).	1.28267	2.73581	3.4343	2.54836	4.23724
Os05g0141100|mRNA|AK107510|CDS+3'UTR	Os05g0141100	Conserved hypothetical protein.	1.08215	0.519262	0.308279	0.190451	0.30222
Os05g0143300|mRNA|AK072841|CDS+3'UTR	Os05g0143300	Conserved hypothetical protein.	4.78507	3.88403	3.16734	3.746	2.3218
Os05g0143300|mRNA|AK099030|CDS+3'UTR	Os05g0143300	Conserved hypothetical protein.	4.68844	3.66434	3.22456	3.4896	2.28589
Os05g0151200|COMBINER|CI409979|5	Os05g0151200	TspO/MBR-related protein family protein.	32.6497	23.6138	57.8852	9.41065	8.71577
Os05g0151200|COMBINER|CI409979|x	Os05g0151200	TspO/MBR-related protein family protein.	26.9483	19.6755	47.3194	7.61882	7.32034
Os05g0156500|mRNA|AK062718|CDS+3'UTR	Os05g0156500	Similar to Apobec-1 binding protein 2.	5.31776	6.99736	3.30138	1.5272	1.13038
Os05g0158500|mRNA|AK106800|CDS+3'UTR	Os05g0158500	Peptidase S10, serine carboxypeptidase family protein.	0.693366	0.10667	0.0835237	0.100062	0.155508
Os05g0160800|mRNA|AK073230|CDS+3'UTR	Os05g0160800	DNA polymerase alpha/epsilon, subunit B domain containing protein.	0.664719	0.175387	0.123523	0.379459	0.248028
Os05g0161100|mRNA|AK062481|UTR	Os05g0161100	Non-protein coding transcript.	0.619532	1.01079	0.979758	0.280177	0.179193
Os05g0161200|mRNA|AB042936|CDS+3'UTR	Os05g0161200	RelA/SpoT domain containing protein.	1.37997	1.73869	1.37077	0.157348	0.0884248
Os05g0161200|mRNA|AK121808|CDS+3'UTR	Os05g0161200	RelA/SpoT domain containing protein.	1.51722	1.78908	1.39493	0.164772	0.0975393
Os05g0162800|COMBINER|CI419838|6	Os05g0162800	Hypothetical conserved gene.	3.36177	14.3022	2.78578	0.393357	0.369335
Os05g0162800|COMBINER|CI419838|x	Os05g0162800	Hypothetical conserved gene.	3.30536	13.7782	2.60173	0.377629	0.295482
Os05g0163300|mRNA|AK105598|CDS+3'UTR	Os05g0163300	Similar to Arabinogalactan protein-like.	0.0854194	0.0868778	0.823377	1.31991	3.90154
Os05g0163400|mRNA|AK073342|CDS+3'UTR	Os05g0163400	Zinc finger, RING/FYVE/PHD-type domain containing protein.	0.721844	0.275614	0.291772	0.227314	0.394052
Os05g0163400|mRNA|AK120340|CDS+3'UTR	Os05g0163400	Zinc finger, RING/FYVE/PHD-type domain containing protein.	0.688917	0.284443	0.304713	0.271194	0.414414
Os05g0165900|mRNA|AK103089|CDS+3'UTR	Os05g0165900	Serine/threonine protein kinase-related domain containing protein.	1.63762	3.84115	6.35433	4.04592	3.76329
Os05g0169000|mRNA|AF435817|5'UTR+CDS	Os05g0169000	Similar to Thioredoxin h-like protein.	3.28229	4.97792	3.48348	1.43732	0.933344
Os05g0170200|mRNA|AK063609|CDS+3'UTR	Os05g0170200	Similar to LRR-like protein.	6.78177	14.2994	13.3982	0.989293	2.0391
Os05g0170200|mRNA|AK063611|CDS+3'UTR	Os05g0170200	Conserved hypothetical protein.	6.5424	14.9981	13.5296	1.04069	2.13328
Os05g0170200|mRNA|AY594285|CDS+3'UTR	Os05g0170200	Conserved hypothetical protein.	6.87394	15.8519	14.4058	1.0849	2.18055
Os05g0171900|mRNA|AK106348|CDS+3'UTR	Os05g0171900	Similar to Lactoylglutathione lyase.	5.62282	4.24651	3.36674	1.6331	1.55922
Os05g0177500|COMBINER_EST|CI259773|6	Os05g0177500	UDP-glucuronosyl/UDP-glucosyltransferase family protein.	0.244263	0.207405	0.679746	0.340342	0.496737
Os05g0180800|COMBINER|CI283061|6			32.0663	42.1399	19.5854	1.39744	1.43774
Os05g0181200|mRNA|AK105519|CDS+3'UTR	Os05g0181200	Similar to Phytochrome P450-like protein.	1.55302	2.20344	6.55633	5.69702	11.9082
Os05g0181300|mRNA|AK062607|CDS+3'UTR	Os05g0181300	Conserved hypothetical protein.	15.0574	8.60801	1.95611	2.20199	2.93108
Os05g0181700|COMBINER_EST|AU093469|6	Os05g0181700	Conserved hypothetical protein.	2.36312	4.97319	2.8517	1.94541	3.59196
Os05g0193700|COMBINER_EST|AU101952|6	Os05g0193700	IQ calmodulin-binding region domain containing protein.	0.464461	0.574921	5.94182	4.61906	11.2821
Os05g0194900|mRNA|AK071798|CDS+3'UTR	Os05g0194900	Similar to Pyrophosphate-fructose-6-phosphate 1-phosphotransferase-like protein (Pyrophosphate-dependent phosphofructo-1-kinase-like protein).	7.96173	4.23146	18.5253	1.13649	1.34439
Os05g0195200|mRNA|AK106392|CDS+3'UTR	Os05g0195200	Zinc finger, CCCH-type domain containing protein.	3.21966	3.81296	3.71048	3.59832	3.89874
Os05g0199500|mRNA|AK063319|CDS+3'UTR	Os05g0199500	Glycosyl transferase, family 31 protein.	4.34077	1.51983	0.906651	0.279962	0.208306
Os05g0200500|mRNA|AK072116|CDS+3'UTR	Os05g0200500	Similar to Casein kinase-like protein.	12.8179	11.1346	5.69808	4.67489	2.74992
Os05g0200500|mRNA|AK100357|CDS+3'UTR	Os05g0200500	Similar to Casein kinase-like protein.	7.11666	4.13761	2.79333	1.84003	1.32426
Os05g0203800|mRNA|AK111723|CDS+3'UTR	Os05g0203800	Similar to MADS box protein.	0.684915	0.206949	0.297454	0.226717	0.343269
Os05g0205100|mRNA|AK111332|CDS+3'UTR	Os05g0205100	NLI interacting factor domain containing protein.	0.626073	0.167488	0.21393	0.121213	0.265374
Os05g0206600|COMBINER_EST|AU076292|7	Os05g0206600	Hypothetical conserved gene.	1.01158	0.822504	1.22358	5.50309	10.0805
Os05g0210500|COMBINER_EST|Os05g0210500|8	Os05g0210500	Hypothetical conserved gene.	0.699361	0.211914	0.203819	0.405688	0.291447
Os05g0212300|mRNA|AK063458|CDS+3'UTR	Os05g0212300	Similar to Endo-beta-1,4-glucanase precursor (EC 3.2.1.4).	0.238495	0.735581	0.518901	0.3845	0.309595
Os05g0212300|mRNA|AK099370|CDS+3'UTR	Os05g0212300	Similar to Endo-beta-1,4-glucanase precursor (EC 3.2.1.4).	0.22981	0.74307	0.493792	0.352885	0.290989
Os05g0215700|mRNA|AK107771|CDS+3'UTR	Os05g0215700	Conserved hypothetical protein.	2.09876	6.81962	9.40149	4.16896	5.19858
Os05g0215700|mRNA|AK119724|CDS+3'UTR	Os05g0215700	Conserved hypothetical protein.	2.30417	7.22789	9.61962	4.29855	4.88574
Os05g0219900|mRNA|AK120886|CDS+3'UTR	Os05g0219900	C4-dicarboxylate transporter/malic acid transport protein family protein.	0.645008	0.702849	0.502925	0.273747	0.242397
Os05g0220500|COMBINER_EST|CI436838|6	Os05g0220500	Conserved hypothetical protein.	0.997965	1.42818	1.52949	0.332583	0.288783
Os05g0227800|mRNA|AK110997|CDS+3'UTR	Os05g0227800	Homeodomain-like containing protein.	1.39218	1.56649	1.96124	3.27974	4.05999
Os05g0231700|mRNA|AK060193|CDS+3'UTR	Os05g0231700	Similar to Tonoplast membrane integral protein ZmTIP4-2.	0.793344	0.986681	1.39032	3.08486	3.35974
Os05g0231700|mRNA|AK072531|CDS+3'UTR	Os05g0231700	Similar to Tonoplast membrane integral protein ZmTIP4-2.	0.798538	1.07256	1.1631	6.80918	7.60604
Os05g0231900|COMBINER_EST|CI501135|6	Os05g0231900	Hypothetical conserved gene.	0.105642	0.149132	1.40439	3.22642	4.263
Os05g0232200|mRNA|AK071646|CDS+3'UTR	Os05g0232200	Conserved hypothetical protein.	0.76712	1.00648	0.938013	0.305246	0.149236
Os05g0235800|mRNA|AK102937|CDS+3'UTR	Os05g0235800	DNA-dependent ATPase MCM domain containing protein.	1.26364	0.238559	0.199344	0.502228	0.403953
Os05g0241200|mRNA|AK059788|CDS+3'UTR	Os05g0241200	Similar to Phophate translocator (Fragment).	1.00953	0.619085	0.532097	0.275842	0.294481
Os05g0241200|mRNA|AK073395|CDS+3'UTR	Os05g0241200	Hypothetical conserved gene.	0.940908	0.602148	0.474961	0.315932	0.312713
Os05g0244500|mRNA|AK064349|CDS+3'UTR	Os05g0244500	Glycoside hydrolase, family 5 protein.	0.423765	0.184189	0.274773	0.371192	0.494747
Os05g0247100|mRNA|AK065866|CDS+3'UTR	Os05g0247100	Glycoside hydrolase, family 18 protein.	1.20501	0.778204	16.5818	25.0603	21.9819
Os05g0249900|COMBINER_EST|Os05g0249900|8	Os05g0249900	Hypothetical conserved gene.	1.49713	0.845628	0.400543	0.306853	0.190054
Os05g0252100|COMBINER_EST|CI530121|6	Os05g0252100	Protein of unknown function DUF620 family protein.	0.495001	0.330588	0.468214	0.312753	0.530885
Os05g0272200|COMBINER_EST|CI528242|0	Os05g0272200	Conserved hypothetical protein.	1.19251	0.872819	0.529157	0.220291	0.305236
Os05g0279400|mRNA|AK102650|CDS+3'UTR	Os05g0279400	Zinc finger, RING-type domain containing protein.	7.92482	4.72483	3.18151	1.75484	1.12844
Os05g0279900|COMBINER_EST|Os05g0279900|8	Os05g0279900	Similar to Polygalacturonase A (Fragment).	1.57441	0.926515	0.816835	0.129896	0.13689
Os05g0291700|mRNA|AK073234|CDS+3'UTR	Os05g0291700	Similar to cDNA clone:002-143-C11, full insert sequence.	0.775342	0.493786	0.817381	0.303267	0.198473
Os05g0291700|mRNA|AK099865|CDS+3'UTR	Os05g0291700	NAD(P)-binding domain containing protein.	0.652413	0.51097	0.851091	0.308191	0.218082
Os05g0296700|mRNA|AK063686|CDS+3'UTR	Os05g0296750	Hypothetical gene.	7.48498	1.67676	1.72673	2.36364	3.49665
Os05g0296800|mRNA|AK108441|CDS+3'UTR	Os05g0296800	Hypothetical protein.	191.494	233.273	92.0339	19.1058	12.7279
Os05g0296800|mRNA|AK108511|CDS+3'UTR	Os05g0296800	Hypothetical protein.	174.067	52.4885	24.555	4.65195	9.11689
Os05g0301600|mRNA|AK073928|CDS+3'UTR	Os05g0301600	Protein phosphatase inhibitor 2 (IPP-2) family protein.	0.70763	0.432185	0.385039	0.320483	0.288362
Os05g0303000|mRNA|AK060410|CDS+3'UTR	Os05g0303000	Similar to Stromal 70 kDa heat shock-related protein, chloroplast (Fragment).	6.28518	3.71498	2.15822	1.30017	1.07379
Os05g0304400|mRNA|AK073143|CDS+3'UTR	Os05g0304400	Similar to GDP dissociation inhibitor protein OsGDI2.	3.70161	3.42391	2.11326	2.39801	1.35098
Os05g0307100|COMBINER_EST|CI518370|6	Os05g0307100	Hypothetical protein.	0.171844	0.185619	0.338833	0.542536	0.885374
Os05g0314700|mRNA|AK111406|CDS+3'UTR	Os05g0314700	Conserved hypothetical protein.	0.944172	1.35241	1.36665	3.32777	4.70637
Os05g0316400|mRNA|AK108681|CDS+3'UTR	Os05g0316400	Conserved hypothetical protein.	1.56709	0.995554	1.24151	4.69983	8.54641
Os05g0332600|mRNA|AK098926|CDS+3'UTR	Os05g0332600	Similar to predicted protein.	0.348006	0.411501	0.996343	3.42044	3.56216
Os05g0337200|mRNA|AK063202|CDS+3'UTR	Os05g0337200	Helix-loop-helix DNA-binding domain containing protein.	0.4064	0.315913	0.320104	0.294605	0.354935
Os05g0341600|mRNA|AK111385|CDS+3'UTR	Os05g0341600	Similar to Ras-related protein Rab-21.	3.92714	3.63939	2.69197	1.96747	1.53872
Os05g0348700|mRNA|AK109316|UTR	Os05g0348700	Hypothetical gene.	10.4461	7.70326	5.80888	2.54507	1.36197
Os05g0349000|mRNA|AK070681|CDS+3'UTR	Os05g0349000	Conserved hypothetical protein.	0.984639	1.31963	1.65104	7.00489	8.66701
Os05g0349500|mRNA|AK101703|CDS+3'UTR	Os05g0349500	Pleckstrin homology-type domain containing protein.	1.58251	2.0268	2.31685	4.08079	4.03392
Os05g0352700|COMBINER_EST|Os05g0352700|8	Os05g0352700	Hypothetical conserved gene.	0.835204	0.507301	0.575605	0.20457	0.230015
Os05g0355400|mRNA|AK063864|CDS+3'UTR	Os05g0355450	Conserved hypothetical protein.	0.609769	2.51963	11.9038	10.0145	17.1907
Os05g0355400|mRNA|AK070138|CDS+3'UTR	Os05g0355400	Rossmann-like alpha/beta/alpha sandwich fold domain containing protein.	0.56811	2.44292	9.07259	12.1336	17.6186
Os05g0358200|mRNA|AK073973|CDS+3'UTR	Os05g0358200	DNA primase, small subunit family protein.	0.905186	0.17858	0.152344	0.377363	0.267197
Os05g0361700|mRNA|AJ575218|5'UTR+CDS	Os05g0361700	Similar to ethylene responsive element binding protein 2.	3.05437	1.45155	0.95666	0.241986	0.292531
Os05g0364600|mRNA|AK071503|CDS+3'UTR	Os05g0364600	Similar to ASF/SF2-like pre-mRNA splicing factor SRP31'''.	4.15674	5.96044	4.7585	4.78712	3.94574
Os05g0365600|mRNA|AK105546|CDS+3'UTR	Os05g0365600	Similar to Hydroxyisourate hydrolase.	0.1801	0.0621784	0.605801	0.73649	1.43817
Os05g0366600|mRNA|AK071469|CDS+3'UTR	Os05g0366600	Similar to Hydroxyisourate hydrolase.	0.623234	0.725152	1.18378	0.231739	0.303186
Os05g0367000|mRNA|AK103509|CDS+3'UTR	Os05g0367000	Similar to PHD finger-like domain protein 5A (Splicing factor 3B associated 14 kDa protein) (SF3b14b).	3.42136	3.5477	1.89921	1.92506	1.58424
Os05g0367400|mRNA|AK108439|CDS+3'UTR	Os05g0367400	Thiamin pyrophosphokinase, eukaryotic domain containing protein.	12.7188	9.47794	5.65739	3.22408	2.12307
Os05g0367800|COMBINER_EST|Os05g0367800|8	Os05g0367800	Similar to Luminal binding protein 2 precursor (BiP2) (Heat shock protein 70 homolog 2) (B70) (B-70).	4.20497	6.08251	2.56485	1.48572	1.78195
Os05g0367900|COMBINER_EST|CI483366|6	Os05g0367900	Harpin-induced 1 domain containing protein.	0.212847	0.232165	0.415123	0.174428	0.442739
Os05g0368000|COMBINER_EST|Os05g0368000|8	Os05g0368000	Hypothetical conserved gene.	1.16054	1.0616	0.623746	0.243917	0.263049
Os05g0368700|mRNA|AK064686|CDS+3'UTR	Os05g0368700	Similar to Subtilisin-like protease (Fragment).	0.103636	0.0109606	0.172883	4.00742	4.07097
Os05g0370600|mRNA|AK102476|CDS+3'UTR	Os05g0370600	C2 calcium-dependent membrane targeting domain containing protein.	15.069	6.68885	2.85444	1.34298	1.04685
Os05g0372100|mRNA|AK107148|CDS+3'UTR	Os05g0372100	Hypothetical conserved gene.	3.9948	3.65992	1.61416	1.99527	1.21597
Os05g0373900|mRNA|AK064587|CDS+3'UTR	Os05g0373900	Similar to Eukaryotic peptide chain release factor subunit 1 (eRF1) (Eukaryotic release factor 1) (TB3-1) (Cl1 protein).	4.0909	3.22417	4.8857	2.84807	3.90552
Os05g0375400|mRNA|AF323610|CDS+3'UTR	Os05g0375400	Beta-glucanase precursor.	0.113903	0.191551	0.743091	0.591939	0.929668
Os05g0375400|mRNA|AK060867|CDS+3'UTR	Os05g0375400	Beta-glucanase precursor.	0.110398	0.197567	0.78449	0.591671	0.966579
Os05g0375400|mRNA|AK121825|CDS+3'UTR	Os05g0375400	Beta-glucanase precursor.	0.094164	0.183883	0.776884	0.601674	0.936705
Os05g0376800|mRNA|AK106775|CDS+3'UTR	Os05g0376800	Gibberellin regulated protein family protein.	0.366211	0.201594	0.25816	0.205091	0.438721
Os05g0381400|mRNA|AK102039|CDS+3'UTR	Os05g0381400	Similar to ABA induced plasma membrane protein PM 19.	73.3871	157.725	110.551	25.2787	10.0147
Os05g0382200|COMBINER_EST|Os05g0382200|8	Os05g0382200	Similar to Cation/H+ exchanger (Fragment).	1.01773	0.73777	0.727049	0.291368	0.306625
Os05g0386000|mRNA|AK066148|CDS+3'UTR	Os05g0386000	Conserved hypothetical protein.	3.44276	3.5678	1.99384	2.21814	1.42329
Os05g0386000|mRNA|AK069436|CDS+3'UTR	Os05g0386000	Conserved hypothetical protein.	3.13343	3.28449	2.03754	1.74582	1.30152
Os05g0390600|COMBINER_EST|CI361664|6	Os05g0390600	Conserved hypothetical protein.	0.438445	0.405262	0.354963	0.268458	0.290157
Os05g0390800|COMBINER|CI453322|6	Os05g0390800	Similar to VQ motif family protein.	0.604027	0.693402	0.546443	0.322247	0.28628
Os05g0395400|COMBINER_EST|CI209330|6	Os05g0395400	Hypothetical protein.	0.721276	3.15163	1.9126	7.95049	5.16189
Os05g0397900|mRNA|AK102894|CDS+3'UTR	Os05g0397900	Kinesin, motor region domain containing protein.	1.01593	0.222995	0.301317	0.207119	0.357959
Os05g0399700|mRNA|AB012855|CDS+3'UTR	Os05g0399700	Chitinase (EC 3.2.1.14).	0.271528	0.278302	0.761185	0.990738	1.41994
Os05g0399700|mRNA|AB018248|CDS+3'UTR	Os05g0399700	Chitinase (EC 3.2.1.14).	0.308624	0.303356	0.967144	1.02671	1.4901
Os05g0399700|mRNA|AB096139|CDS+3'UTR	Os05g0399700	Chitinase (EC 3.2.1.14).	0.284858	0.284085	0.834923	0.963928	1.44046
Os05g0399700|mRNA|AK071196|CDS+3'UTR	Os05g0399700	Chitinase (EC 3.2.1.14).	0.291624	0.27808	0.879978	0.923055	1.34837
Os05g0401700|COMBINER_EST|Os05g0401700|8			1.38446	1.05526	1.61021	8.95149	15.1997
Os05g0406100|mRNA|AK066859|CDS+3'UTR	Os05g0406100	Hypothetical conserved gene.	0.567765	0.107753	0.22932	0.538731	0.5456
Os05g0406700|mRNA|AK111462|CDS+3'UTR	Os05g0406700	Hypothetical protein.	1.03476	2.12061	2.07365	5.53898	4.5847
Os05g0407100|mRNA|AK063349|CDS+3'UTR	Os05g0407100	Four F5 protein family protein.	22.4888	27.2546	19.6399	11.7046	7.89759
Os05g0407500|mRNA|AK074026|CDS+3'UTR	Os05g0407500	Alpha/beta hydrolase fold-3 domain containing protein.	1.97517	3.04682	3.59622	3.38488	3.52538
Os05g0408900|mRNA|AK058950|CDS+3'UTR	Os05g0408900	Similar to 1-deoxy-D-xylulose-5-phosphate synthase.	5.19561	4.24228	2.13207	0.397386	0.573833
Os05g0408900|mRNA|AK059821|CDS+3'UTR	Os05g0408900	Similar to 1-deoxy-D-xylulose-5-phosphate synthase.	5.62644	4.87561	1.72519	0.506645	0.165764
Os05g0417500|mRNA|AK068601|CDS+3'UTR	Os05g0417600	Conserved hypothetical protein.	1.54027	1.20685	1.65124	9.58386	16.0015
Os05g0421600|mRNA|AK107746|CDS+3'UTR	Os05g0421600	No apical meristem(NAM) protein domain containing protein.	1.43098	1.8214	4.61601	2.05605	3.37607
Os05g0424000|mRNA|AK065891|CDS+3'UTR	Os05g0424000	Similar to Amino acid carrier (Fragment).	0.593789	0.274507	0.198227	0.36165	0.514117
Os05g0427300|mRNA|AK073321|CDS+3'UTR	Os05g0427300	Similar to RNA binding protein (Fragment).	0.188558	0.199783	0.17541	0.160593	0.128402
Os05g0428600|mRNA|AK106696|CDS+3'UTR	Os05g0428600	Similar to HSP70 precursor.	0.631374	3.85263	3.84255	0.758269	4.64705
Os05g0430700|mRNA|AK121485|CDS+3'UTR	Os05g0430700	Protein of unknown function DUF803 family protein.	0.378742	0.241816	0.241964	0.332615	0.356328
Os05g0433400|COMBINER_EST|Os05g0433400|8	Os05g0433400	Protein of unknown function DUF1218 family protein.	3.23393	2.0132	3.63106	3.39292	5.27295
Os05g0435400|mRNA|AK109595|CDS+3'UTR	Os05g0435400	Conserved hypothetical protein.	35.582	22.2953	11.5931	2.43671	1.90205
Os05g0435800|mRNA|AK067138|CDS+3'UTR	Os05g0435800	Similar to Subtilisin-like protease.	0.148962	0.20757	0.345559	0.73509	0.775874
Os05g0438700|mRNA|AK120955|CDS+3'UTR	Os05g0438700	Similar to Histone H3.1 (Major histone H3).	1.48704	1.02291	0.462228	0.267524	0.194613
Os05g0439400|mRNA|AK121082|CDS+3'UTR	Os05g0439400	Similar to Arm repeat containing protein.	3.15296	3.52105	1.8682	1.79028	1.79179
Os05g0442400|mRNA|AK107134|CDS+3'UTR	Os05g0442400	Similar to MybSt1.	0.781711	3.80503	4.15756	0.655646	0.780642
Os05g0445500|mRNA|AK121459|CDS+3'UTR	Os05g0445500	Similar to 60S acidic ribosomal protein P2B.	1.23167	0.748081	0.470058	0.310337	0.279607
Os05g0453100|mRNA|AK110736|CDS+3'UTR	Os05g0453100	Hypothetical protein.	3.76046	4.44777	3.28323	2.44729	2.68245
Os05g0453500|mRNA|AK102175|CDS+3'UTR	Os05g0453500	Guanylyl cyclase domain containing protein.	3.1765	3.58287	3.9577	4.19987	4.14496
Os05g0454500|mRNA|AK121844|CDS+3'UTR	Os05g0454500	Conserved hypothetical protein.	0.667232	1.37994	4.18462	3.7979	5.5172
Os05g0457000|mRNA|AK110966|CDS+3'UTR	Os05g0457000	Conserved hypothetical protein.	40.4996	64.4793	11.0095	2.72036	2.76095
Os05g0457800|COMBINER_EST|CI447081|6	Os05g0457800	Similar to Glycerol-3-phosphate acyltransferase 5 (EC 2.3.1.15) (AtGPAT5).	0.489799	0.195542	2.65024	1.81126	3.39864
Os05g0460000|COMBINER_EST|CI368692|0	Os05g0460000	Similar to 70 kDa heat shock cognate protein 1.	63.3595	39.9562	17.6723	5.43667	2.98901
Os05g0460500|COMBINER_EST|CI239574|6	Os05g0460500	Hypothetical gene.	10.7501	3.29467	1.5264	0.617635	1.08035
Os05g0462000|COMBINER_EST|CI461360|0	Os05g0462000	Conserved hypothetical protein CHP01589, plant domain containing protein.	0.782043	0.872267	0.755147	0.158629	0.0668177
Os05g0463300|COMBINER|CI123049|6	Os05g0463300	Hypothetical conserved gene.	0.218369	0.20061	0.24055	0.407846	0.967128
Os05g0467400|mRNA|AK111458|CDS+3'UTR	Os05g0467400	Protein of unknown function DUF1618 domain containing protein.	1.01728	1.00107	1.30794	3.04353	3.14949
Os05g0467800|COMBINER|CI093215|6	Os05g0467800	Hypothetical conserved gene.	0.69894	0.242554	0.357573	0.223412	0.272189
Os05g0468700|mRNA|AB051864|CDS+3'UTR	Os05g0468700	Ammonium transporter.	2.09032	3.55343	2.02742	1.79396	5.78883
Os05g0468800|COMBINER_EST|CI459446|3	Os05g0468800	Phosphatidylethanolamine-binding protein PEBP domain containing protein.	157.455	272.991	90.5912	17.1872	7.69932
Os05g0469600|mRNA|D10413|CDS	Os05g0469600	Similar to Pyruvate decarboxylase (Fragment).	7.04102	12.1632	59.6447	2.89069	1.7526
Os05g0469600|mRNA|U07339|CDS+3'UTR	Os05g0469600	Similar to Pyruvate decarboxylase (Fragment).	8.62373	63.5041	1535.98	1.47253	1.01675
Os05g0472700|mRNA|AB126087|CDS	Os05g0472700	Similar to Metal transport protein.	0.292814	0.230984	0.56857	0.590372	0.663539
Os05g0472700|mRNA|AK070864|CDS+3'UTR	Os05g0472700	Similar to Metal transport protein.	0.183211	0.233626	0.563688	0.72276	0.872808
Os05g0472700|mRNA|AY281300|CDS+3'UTR	Os05g0472700	Similar to Metal transport protein.	0.179046	0.226994	0.563821	0.609695	0.703322
Os05g0474600|mRNA|AK066733|CDS+3'UTR	Os05g0474600	Similar to Aldose reductase-related protein (EC 1.1.1.21).	1.90326	5.77322	4.07871	2.6859	2.61839
Os05g0476200|mRNA|AK063430|CDS+3'UTR	Os05g0476200	Similar to DNA replication licensing factor MCM3 homolog (Replication origin activator) (ROA protein) (Fragment).	1.28354	0.251571	0.16907	0.38383	0.280903
Os05g0476200|mRNA|AK099369|CDS+3'UTR	Os05g0476200	Similar to DNA replication licensing factor MCM3 homolog (Replication origin activator) (ROA protein) (Fragment).	1.29659	0.244796	0.172862	0.371944	0.297245
Os05g0477600|mRNA|AK058811|UTR	Os05g0477600	Non-protein coding transcript.	0.0641124	0.320539	0.453595	1.5471	0.875502
Os05g0478000|mRNA|AK111029|CDS+3'UTR	Os05g0478000	Zinc finger, RING/FYVE/PHD-type domain containing protein.	0.291406	0.330298	0.779862	1.57019	1.94725
Os05g0480800|COMBINER|CI260158|6	Os05g0480800	Hypothetical conserved gene.	0.458387	0.36424	0.891645	0.152688	0.174126
Os05g0481900|mRNA|AK106744|CDS+3'UTR	Os05g0481900	Auxin efflux carrier domain containing protein.	0.531041	0.451056	0.291451	0.14129	0.215636
Os05g0481900|mRNA|AK119626|CDS+3'UTR	Os05g0481900	Auxin efflux carrier domain containing protein.	0.544314	0.51403	0.314151	0.158753	0.235105
Os05g0482400|mRNA|AK109526|CDS+3'UTR	Os05g0482400	Cytochrome P450 family protein.	0.246069	0.388748	0.318932	0.487334	0.479638
Os05g0484000|mRNA|AK106829|CDS+3'UTR	Os05g0484000	Protein of unknown function DUF295 family protein.	0.777124	0.558071	0.658555	0.26139	0.20844
Os05g0484700|mRNA|AK111182|CDS+3'UTR	Os05g0484700	Protein of unknown function DUF295 family protein.	0.983883	0.741064	0.848558	0.234454	0.202277
Os05g0485300|mRNA|AK102064|CDS+3'UTR	Os05g0485300	TRAM, LAG1 and CLN8 homology domain containing protein.	0.500037	1.06643	1.42202	4.2042	3.19732
Os05g0488600|COMBINER_EST|CI442618|0	Os05g0488600	Similar to Phosphate starvation regulator protein (Regulatory protein of P- starvation acclimation response Psr1).	0.470954	2.56205	5.40568	1.45959	4.63049
Os05g0490200|mRNA|AK073984|CDS+3'UTR	Os05g0490200	Similar to serologically defined breast cancer antigen NY-BR-84.	3.58174	6.16957	3.42881	1.4421	1.09479
Os05g0490200|mRNA|AK101147|CDS+3'UTR	Os05g0490200	Protein of unknown function DUF1692 domain containing protein.	3.53033	3.14318	1.3727	0.957626	0.786122
Os05g0491200|mRNA|AK071229|CDS+3'UTR	Os05g0491200	Similar to SNF1 kinase complex anchoring protein (Fragment).	0.604019	1.62711	3.34999	3.93616	3.91564
Os05g0491900|COMBINER_EST|CI225193|6	Os05g0491900	Hypothetical conserved gene.	0.302475	0.231088	0.95772	0.997639	1.41808
Os05g0492100|mRNA|AK103698|CDS+3'UTR	Os05g0492100	Conserved hypothetical protein.	1.33798	2.09471	3.06674	2.86832	4.06038
Os05g0493500|COMBINER_EST|CI142605|6	Os05g0493500	Similar to Cyclin-B1-5.	0.674261	0.19393	0.362916	0.0826432	0.232165
Os05g0494600|mRNA|AK108158|CDS+3'UTR	Os05g0494600	Conserved hypothetical protein.	2.48496	1.6866	2.53612	8.61934	10.3918
Os05g0495100|mRNA|AK108028|CDS+3'UTR	Os05g0495100	Zinc finger, C2H2-type domain containing protein.	2.63731	3.00179	2.88216	3.72924	2.68697
Os05g0495300|mRNA|AK061674|UTR	Os05g0495300	Non-protein coding transcript.	4.65844	7.02519	5.49362	3.8462	2.32526
Os05g0495300|mRNA|AK067980|UTR	Os05g0495300	Conserved hypothetical protein.	5.52491	8.14034	5.407	2.96163	1.67637
Os05g0495300|mRNA|AK069722|CDS+3'UTR	Os05g0495300	Hypothetical protein.	5.01141	7.75475	5.80148	3.49596	1.98575
Os05g0495300|mRNA|AK120354|CDS+3'UTR	Os05g0495300	Hypothetical protein.	4.90429	6.01021	4.80261	3.6432	2.04225
Os05g0495400|mRNA|AK066268|CDS+3'UTR	Os05g0495300	Hypothetical conserved gene.	3.41047	2.45859	3.04895	1.12177	1.43113
Os05g0495900|mRNA|AB027431|CDS+3'UTR	Os05g0495900	Similar to Beta-1,3-glucanase precursor (Fragment).	0.233688	0.277957	0.541102	0.765332	1.19555
Os05g0495900|mRNA|AB027432|CDS+3'UTR	Os05g0495900	Similar to Beta-1,3-glucanase precursor (Fragment).	0.168187	0.276192	0.5915	0.82402	1.28988
Os05g0495900|mRNA|AK069244|CDS+3'UTR	Os05g0495900	Similar to Beta-1,3-glucanase precursor (Fragment).	0.17924	0.328478	0.600776	0.909789	1.34294
Os05g0497500|COMBINER_EST|CI360367|6	Os05g0497500	Hypothetical conserved gene.	1.99462	3.19502	2.52271	3.07232	2.04374
Os05g0498300|mRNA|AK101127|CDS+3'UTR	Os05g0498300	DNA mismatch repair protein MutS, core domain containing protein.	2.32574	3.95631	3.02274	3.51963	2.48352
Os05g0501400|mRNA|AK110116|CDS+3'UTR	Os05g0501400	Similar to Receptor-like protein kinase 5.	0.188125	0.218803	0.643249	1.83332	2.09968
Os05g0502500|mRNA|AK060111|CDS+3'UTR	Os05g0502500	Conserved hypothetical protein.	4.1072	4.00501	2.06873	1.31703	1.2819
Os05g0506100|COMBINER_EST|Os05g0506100|8	Os05g0506100	Hypothetical conserved gene.	0.471862	0.212536	0.623355	0.0783443	0.0611845
Os05g0507000|mRNA|AK108025|CDS+3'UTR	Os05g0507000	Conserved hypothetical protein.	0.964443	0.240532	0.301774	0.0937645	0.329536
Os05g0510100|COMBINER_EST|AU029398|6	Os05g0510100	Protein of unknown function DUF567 family protein.	1.71102	2.43878	1.42943	0.212136	0.100539
Os05g0511000|mRNA|AK061738|CDS+3'UTR	Os05g0511000	TRAM, LAG1 and CLN8 homology domain containing protein.	3.16578	3.09185	1.87629	1.06088	0.809147
Os05g0513600|mRNA|AK106888|CDS+3'UTR	Os05g0513600	Conserved hypothetical protein.	0.972002	1.01781	8.3197	2.82211	3.92939
Os05g0514400|COMBINER_EST|CI450022|6	Os05g0514400	Hypothetical conserved gene.	0.235113	0.274131	0.550612	0.661325	1.45719
Os05g0516400|mRNA|AK068854|CDS+3'UTR	Os05g0516550	Hypothetical gene.	3.16699	5.7564	6.8678	2.60843	3.6302
Os05g0519300|mRNA|AK110584|CDS+3'UTR	Os05g0519300	Protein of unknown function DUF506, plant family protein.	4.55501	2.27202	3.16608	0.437279	0.638479
Os05g0519700|mRNA|AF332981|CDS+3'UTR	Os05g0519700	Similar to Heat shock protein 101.	15.0634	13.6622	10.5199	4.74496	2.7211
Os05g0519700|mRNA|AK100903|CDS+3'UTR	Os05g0519700	Heat shock protein 101.	14.8743	14.4395	10.5932	4.94047	2.74792
Os05g0519700|mRNA|AK105433|CDS+3'UTR	Os05g0519700	Heat shock protein 101.	21.1133	17.2452	11.9599	5.81543	2.96589
Os05g0519700|mRNA|AK121414|CDS+3'UTR	Os05g0519700	Similar to Heat shock protein 101.	7.60577	7.01888	7.58698	3.77505	2.42479
Os05g0521300|mRNA|AK072664|CDS+3'UTR	Os05g0521300	Similar to Histidine-containing phosphotransfer protein 4.	1.19021	2.20332	2.50166	4.69318	3.09337
Os05g0521500|mRNA|AK066030|CDS+3'UTR	Os05g0521500	Peptidase S16, lon N-terminal domain containing protein.	3.08757	3.12853	2.47696	2.65012	1.56111
Os05g0524200|mRNA|AK071990|CDS+3'UTR	Os05g0524200	Protein-tyrosine phosphatase, dual specificity domain containing protein.	4.09433	3.69017	2.72781	1.83194	1.49828
Os05g0529700|mRNA|AK062298|CDS+3'UTR	Os05g0529700	Similar to electron transporter/ heat shock protein binding protein.	9.18026	5.38593	2.68279	0.699103	0.60844
Os05g0529700|mRNA|AK064168|CDS+3'UTR	Os05g0529700	Similar to electron transporter/ heat shock protein binding protein.	9.62907	5.64099	3.09724	1.13853	0.983353
Os05g0531100|mRNA|AK109325|CDS+3'UTR	Os05g0531100	Protein of unknown function DUF584 family protein.	0.702945	0.906834	1.3602	3.35114	4.4268
Os05g0533900|mRNA|AK106477|CDS+3'UTR	Os05g0533900	Similar to CLP protease regulatory subunit CLPX precursor.	3.49576	3.73472	3.40796	4.39778	3.5041
Os05g0534600|mRNA|AK066927|CDS+3'UTR	Os05g0534600	CASC3/Barentsz eIF4AIII binding domain containing protein.	11.6405	4.20708	2.28169	1.5076	1.07746
Os05g0534600|mRNA|AK068203|CDS+3'UTR	Os05g0534600	CASC3/Barentsz eIF4AIII binding domain containing protein.	12.2886	4.33408	2.32483	1.54225	1.11575
Os05g0536000|mRNA|AK109124|CDS+3'UTR	Os05g0536000	Hypothetical conserved gene.	1.66952	1.16083	1.34393	3.41147	6.57798
Os05g0537100|COMBINER_EST|CI430861|0	Os05g0537100	WRKY transcription factor 10.	4.76736	8.75924	4.44008	3.55447	5.11247
Os05g0540300|mRNA|AK070127|CDS+3'UTR	Os05g0540300	Similar to Chaperonin CPN60-2, mitochondrial precursor (HSP60-2).	5.66584	6.80299	3.44653	3.48756	2.22913
Os05g0540600|mRNA|AK072324|CDS+3'UTR	Os05g0540600	Cyclin-like F-box domain containing protein.	3.09084	4.02997	3.1702	3.35514	2.57647
Os05g0540600|mRNA|AK099110|CDS+3'UTR	Os05g0540600	Cyclin-like F-box domain containing protein.	2.96677	3.92366	3.25053	3.2348	2.65679
Os05g0546600|COMBINER_EST|CI144574|6			2.24752	3.02767	2.67285	3.12693	2.22758
Os05g0548900|COMBINER_EST|CI548173|3	Os05g0548900	Similar to Phosphoethanolamine methyltransferase.	0.589367	0.148816	0.110504	0.0966177	0.0777335
Os05g0550300|mRNA|AK062463|CDS+3'UTR	Os05g0550300	Similar to Lipid transfer protein (Fragment).	1.76921	3.26172	4.13568	4.44964	3.81562
Os05g0552000|COMBINER|CI039150|6	Os05g0552000	Hypothetical protein.	0.18678	0.337474	0.331026	0.426681	0.422364
Os05g0552200|mRNA|AK064636|CDS+3'UTR	Os05g0552200	Glycosyl transferase, family 31 protein.	1.00881	0.744322	1.26839	5.43033	5.45076
Os05g0555600|mRNA|AK070485|CDS+3'UTR	Os05g0555600	Similar to NADH dependent Glutamate Synthase precursor (EC 1.4.1.14).	0.983632	0.831076	1.81938	4.57845	3.82566
Os05g0555600|mRNA|AK071893|CDS+3'UTR	Os05g0555600	Similar to NADH-glutamate synthase 2.	0.715693	0.625974	1.33646	3.85434	3.27711
Os05g0560200|COMBINER_EST|CI026016|3	Os05g0560200	Conserved hypothetical protein.	2.36922	2.97413	3.60796	7.92225	6.1213
Os05g0560500|mRNA|AK105233|CDS+3'UTR	Os05g0560500	Conserved hypothetical protein.	3.80893	31.3685	3.80779	2.59061	1.3692
Os05g0560600|mRNA|AK122091|CDS+3'UTR	Os05g0560600	Homeodomain-like containing protein.	0.856527	0.5149	0.324788	0.233571	0.19315
Os05g0560900|mRNA|AK063973|CDS+3'UTR	Os05g0560900	Similar to gibberellin 2-beta-dioxygenase.	0.583675	1.63661	3.32126	2.26044	3.11059
Os05g0560900|mRNA|AK101758|CDS+3'UTR	Os05g0560900	Isopenicillin N synthase family protein.	0.74613	1.63452	3.01371	2.10477	3.05092
Os05g0562200|mRNA|AK061766|CDS+3'UTR	Os05g0562200	Drought induced 19 family protein.	1.15588	1.62493	2.02388	4.78111	6.47544
Os05g0562200|mRNA|AK109438|CDS+3'UTR	Os05g0562200	Drought induced 19 family protein.	0.914012	1.26442	1.55436	3.38249	4.3251
Os05g0562300|mRNA|AK067414|CDS+3'UTR	Os05g0562300	Similar to DnaJ-like protein.	7.96945	5.71425	3.9409	2.00198	1.4151
Os05g0563300|mRNA|AK072939|CDS+3'UTR	Os05g0563300	Conserved hypothetical protein.	1.37472	1.37932	1.65601	3.1085	3.9464
Os05g0565400|mRNA|AK068910|CDS+3'UTR	Os05g0565400	Protein of unknown function DUF561 family protein.	0.676521	0.171118	0.515424	4.62589	4.67868
Os05g0565400|mRNA|AK103931|CDS+3'UTR	Os05g0565400	Protein of unknown function DUF561 family protein.	0.693891	0.119962	0.474933	4.12826	4.24748
Os05g0565400|mRNA|AK104836|CDS+3'UTR	Os05g0565400	Protein of unknown function DUF561 family protein.	0.716271	0.213135	0.548602	4.12614	4.52888
Os05g0568100|mRNA|AK069724|CDS+3'UTR	Os05g0568100	Similar to Iron sulfur cluster assembly protein 1, mitochondrial precursor (Iron sulfur cluster scaffold protein 1).	5.96187	7.19465	3.7755	2.08448	1.6753
Os05g0568800|mRNA|AK059883|CDS+3'UTR	Os05g0568800	Protein of unknown function DUF1645 family protein.	0.217042	0.182588	0.593264	0.541002	1.07613
Os05g0568900|mRNA|AK061450|CDS+3'UTR	Os05g0568900	Similar to Protease Do-like 1, chloroplast precursor (EC 3.4.21.-).	8.69067	4.49375	2.1482	1.23347	1.10552
Os05g0568900|mRNA|AK067365|CDS+3'UTR	Os05g0568900	Similar to Protease Do-like 1, chloroplast precursor (EC 3.4.21.-).	8.01444	5.76321	3.03486	1.1472	0.959675
Os05g0568900|mRNA|AK120626|CDS+3'UTR	Os05g0568900	Similar to Protease Do-like 1, chloroplast precursor (EC 3.4.21.-).	8.87037	4.50753	1.98866	1.28138	1.19614
Os05g0569300|mRNA|AK065440|CDS+3'UTR	Os05g0569300	Similar to G-box binding factor 1.	2.25756	3.79506	3.34127	1.97346	2.2749
Os05g0570200|mRNA|AK106827|CDS+3'UTR	Os05g0570200	Protein of unknown function DUF295 family protein.	1.69091	0.909596	0.732576	0.30761	0.283219
Os05g0570300|COMBINER|CI141062|6			1.42865	0.798059	0.785969	0.315296	0.256596
Os05g0570300|COMBINER|CI447443|x			1.22251	0.833004	0.710413	0.326506	0.160948
Os05g0573200|mRNA|AF155334|CDS+3'UTR	Os05g0573200	Similar to Isocitrate dehydrogenase (Fragment).	1.21026	0.989727	0.328512	0.104417	0.0951269
Os05g0573300|mRNA|AK070411|CDS+3'UTR	Os05g0573300	Similar to CTP synthase 1 (EC 6.3.4.2) (UTP--ammonia ligase 1) (CTP synthetase 1).	0.437321	0.317009	0.286409	0.41688	0.537494
Os05g0573900|COMBINER_EST|CI512622|6	Os05g0573900	Similar to predicted protein.	1.08448	0.236341	0.312005	0.186756	0.305508
Os05g0574600|mRNA|AK070754|CDS+3'UTR	Os05g0574600	Similar to Fatty acid elongase 1-like protein.	0.217356	0.406082	1.26886	1.9262	5.5163
Os05g0579500|mRNA|AK121528|CDS+3'UTR	Os05g0579500	Conserved hypothetical protein.	4.38938	3.35216	5.72602	9.22551	13.392
Os05g0579600|COMBINER_EST|CI437851|0	Os05g0579600	Homeodomain-like containing protein.	1.11665	0.168123	0.856689	0.217618	0.18682
Os05g0580500|mRNA|AK102000|CDS+3'UTR	Os05g0580500	Similar to 10A19I.14.	6.28266	3.96948	1.51426	0.874906	0.958823
Os05g0580500|mRNA|AY371049|CDS+3'UTR	Os05g0580500	Similar to 10A19I.14.	4.67534	3.01845	1.34016	1.13479	1.19533
Os05g0581600|mRNA|AK110257|CDS+3'UTR	Os05g0581600	Kv1.4 voltage-gated K+ channel family protein.	1.34536	3.84005	3.41124	2.97362	3.05856
Os05g0582000|COMBINER_EST|CI220458|6	Os05g0582000	Plant Basic Secretory Protein domain containing protein.	1.19777	0.69368	0.546957	0.200484	0.098852
Os05g0584600|mRNA|AK072537|CDS+3'UTR	Os05g0584600	ATPase, AAA-type, core domain containing protein.	0.590971	0.588704	0.4256	0.236004	0.253978
Os05g0586000|COMBINER|CI550957|6	Os05g0586000	Protein of unknown function DUF247, plant domain containing protein.	0.31712	2.06053	4.53824	6.03989	7.321
Os05g0586000|COMBINER|CI550957|x	Os05g0586000	Protein of unknown function DUF247, plant domain containing protein.	0.353573	1.86646	3.5363	4.82328	5.08388
Os05g0587300|mRNA|AK120811|CDS+3'UTR	Os05g0587300	Molecular chaperone, heat shock protein, Hsp40, DnaJ domain containing protein.	0.612549	0.635996	0.453281	0.274421	0.301806
Os05g0587700|mRNA|AK064730|CDS+3'UTR	Os05g0587700	Protein of unknown function DUF231, plant domain containing protein.	0.499773	0.221992	0.158524	0.231551	0.18836
Os05g0588500|mRNA|AK069614|CDS+3'UTR	Os05g0588500	MtN3 and saliva related transmembrane protein family protein.	0.207515	0.0625897	0.328617	3.9721	5.56153
Os05g0588700|mRNA|AK100256|CDS+3'UTR	Os05g0588700	Paired amphipathic helix domain containing protein.	51.1231	37.961	17.1004	4.67812	2.89085
Os05g0590000|mRNA|AK070159|CDS+3'UTR	Os05g0590000	Peptidase A1 domain containing protein.	0.42257	0.263428	0.29366	0.19745	0.430419
Os05g0590000|mRNA|AK103957|CDS+3'UTR	Os05g0590000	Peptidase A1 domain containing protein.	0.449459	0.275963	0.327453	0.205158	0.443106
Os05g0590100|mRNA|AK072823|CDS+3'UTR	Os05g0590100	Ubiquitin domain containing protein.	0.260964	0.39389	0.262877	0.192835	0.451704
Os05g0591900|mRNA|AK062360|UTR	Os05g0591900	Non-protein coding transcript.	0.764431	1.187	1.7874	5.78808	3.8451
Os05g0591900|mRNA|AK107074|CDS+3'UTR	Os05g0591900	Hypothetical gene.	1.37098	1.92149	2.36181	4.56908	3.57536
Os05g0594500|mRNA|AK067256|CDS+3'UTR	Os05g0594500	Invasin/intimin cell-adhesion domain containing protein.	0.543104	0.543619	0.496968	0.33292	0.31992
Os05g0595100|mRNA|AB087745|CDS+3'UTR	Os05g0595100	Similar to UDP-glucose-4-epimerase.	3.52143	3.4364	2.42289	1.15844	1.27535
Os05g0595100|mRNA|AK066249|CDS+3'UTR	Os05g0595100	Similar to UDP-glucose-4-epimerase.	24.8907	5.53502	11.358	2.32255	2.61572
Os05g0595100|mRNA|D21120|5'UTR+CDS	Os05g0595100	Similar to UDP-glucose-4-epimerase.	5.20626	4.57296	2.66973	0.998161	0.963333
Os06g0101300|mRNA|AK121897|CDS+3'UTR	Os06g0101300	Zinc finger, RING/FYVE/PHD-type domain containing protein.	5.9516	3.55965	2.31146	1.25947	1.24208
Os06g0109200|mRNA|AK060278|CDS+3'UTR	Os06g0109200	Protein of unknown function DUF6, transmembrane domain containing protein.	0.191942	0.213001	0.207815	0.152384	0.247024
Os06g0109200|mRNA|AK099078|CDS+3'UTR	Os06g0109200	Protein of unknown function DUF6, transmembrane domain containing protein.	0.218522	0.247097	0.270698	0.154767	0.294145
Os06g0109600|mRNA|AK066989|CDS+3'UTR	Os06g0109600	Similar to Uridylate kinase (EC 2.7.4.-) (UK) (Uridine monophosphate kinase) (UMP kinase) (UMP/CMP kinase).	3.653	15.9228	7.42971	3.96999	2.64892
Os06g0110000|mRNA|AK069429|CDS+3'UTR	Os06g0110000	Similar to DWARF3 (Fragment).	0.446858	0.287139	0.212749	0.210945	0.298874
Os06g0110200|mRNA|AK107973|CDS+3'UTR	Os06g0110200	Late embryogenesis abundant (LEA) group 1 family protein.	14.5984	7.17946	8.45715	0.727081	1.11088
Os06g0113900|mRNA|AK065021|UTR	Os06g0113950	Hypothetical conserved gene.	0.278556	0.360033	0.297464	0.684818	1.0737
Os06g0114000|mRNA|AK063734|UTR	Os06g0114000	Hypothetical gene.	108.687	38.337	19.2661	1.76508	2.42103
Os06g0114000|mRNA|AK101334|CDS+3'UTR	Os06g0114000	Similar to 60 kDa chaperonin (Protein Cpn60) (groEL protein) (63 kDa stress protein) (GSP63).	3.69204	3.25451	2.2932	1.7264	1.32126
Os06g0114400|COMBINER_EST|AU082409|6	Os06g0114400	Conserved hypothetical protein.	3.97625	5.42153	2.60662	3.21064	3.82636
Os06g0115700|mRNA|AK060414|CDS+3'UTR	Os06g0115700	Conserved hypothetical protein.	0.276905	0.0699086	0.110072	0.342688	0.291124
Os06g0115700|mRNA|AK073098|CDS+3'UTR	Os06g0115700	Hypothetical conserved gene.	0.287949	0.0762019	0.126492	0.362168	0.315764
Os06g0116800|mRNA|AK058985|CDS+3'UTR	Os06g0116800	Similar to GFA2.	6.22991	5.89889	3.49147	2.45251	1.75379
Os06g0116800|mRNA|AK120746|CDS+3'UTR	Os06g0116800	Similar to GFA2.	6.7301	6.81575	3.66525	2.84753	1.99456
Os06g0117500|COMBINER|CI232886|6	Os06g0117500	Hypothetical conserved gene.	0.319788	0.226751	0.443974	0.454767	0.517398
Os06g0119100|mRNA|AK065857|CDS+3'UTR	Os06g0119100	Protein of unknown function DUF594 family protein.	0.621201	0.268978	0.296705	0.335966	0.45738
Os06g0119100|mRNA|AK099129|CDS+3'UTR	Os06g0119100	Hypothetical conserved gene.	0.602795	0.274813	0.287083	0.359461	0.457692
Os06g0119300|mRNA|AK067271|CDS+3'UTR	Os06g0119300	Protein of unknown function DUF594 family protein.	0.327807	0.232812	0.466367	0.680309	0.704666
Os06g0119600|mRNA|AK066409|CDS+3'UTR	Os06g0119600	Peptidase aspartic, catalytic domain containing protein.	0.387373	0.100536	0.228245	0.258258	0.50362
Os06g0119600|mRNA|AK104685|CDS+3'UTR	Os06g0119600	Peptidase aspartic, catalytic domain containing protein.	0.384812	0.106653	0.226623	0.279242	0.540325
Os06g0125200|mRNA|AK102200|CDS+3'UTR	Os06g0125200	Protein of unknown function DUF581 family protein.	5.45984	10.9044	64.416	5.37407	9.13922
Os06g0125400|COMBINER_EST|CI405841|0	Os06g0125400	Similar to Oligopeptide transporter 9.	0.580177	0.779907	0.456451	0.279257	0.263812
Os06g0127100|mRNA|AY327040|CDS+3'UTR	Os06g0127100	Dehydration-responsive element-binding protein 1C.	5.22346	2.60811	1.31569	0.23474	0.505608
Os06g0127700|mRNA|AK072617|CDS+3'UTR	Os06g0127700	Similar to Oligopeptide transporter 7 (AtOPT7).	3.02553	3.71687	2.93725	2.74791	2.78932
Os06g0127800|mRNA|AK106449|CDS+3'UTR	Os06g0127800	Dwarf and low-tillering.;Brassinosteroid signaling.;GAI-RGA-SCR (GRAS) family protein.	1.02829	0.155553	0.156242	0.0463418	0.168234
Os06g0129700|COMBINER_EST|AU029348|6	Os06g0129700	NUDIX hydrolase domain containing protein.	1.09454	1.12593	1.39176	3.577	3.00265
[truncated: 1,366 more rows]
