# Supplementary material for: Expression Profile in Rice Panicle: Insights into Heat Response Mechanism at Reproductive Stage
Source: PLoS One. 2012 Nov 14;7(11):e49652. doi: 10.1371/journal.pone.0049652 (PMC3498232; doi:10.1371/journal.pone.0049652)
Supplement: Table S4 — The HR transcription factors. (XLS) [file pone.0049652.s004.xls]

## Sheet: Hsf
Table S4_1 The HR Hsf genes
OsHsf	ProbeName	RAP_ID	Annotation (Build 5)	ratio-20 min	ratio-60 min	ratio-2 h	ratio-4 h	ratio-8 h
OsHsfC1b	Os01g0733200|mRNA|AK066316|CDS+3'UTR	Os01g0733200	Similar to Heat shock transcription factor 29 (Fragment).	0.455827	0.510382	0.854366	20.9651	28.0475
	Os01g0733200|mRNA|AY344493|CDS+3'UTR	Os01g0733200	Similar to Heat shock transcription factor 29 (Fragment).	0.444712	0.49771	0.8599	19.9954	27.7358
OsHsfA3	Os02g0527300|mRNA|AK101934|CDS+3'UTR	Os02g0527300	Similar to Heat shock transcription factor 31 (Fragment).	5.48516	3.03244	3.4538	6.24789	4.76061
OsHsfA2d	Os03g0161900|mRNA|AK066844|CDS+3'UTR	Os03g0161900	Similar to Isoform 2 of Heat stress transcription factor A-2d.	13.3492	3.63089	2.43593	1.12673	0.70573
	Os03g0161900|mRNA|AY344489|CDS+3'UTR	Os03g0161900	Similar to Isoform 2 of Heat stress transcription factor A-2d.	12.3405	3.94189	2.61141	1.16999	0.717112
OsHsfA9	Os03g0224700|mRNA|AJ575240|5'UTR+CDS	Os03g0224700	Similar to HSP protein (Fragment).	5.77046	7.53237	4.99888	2.59996	1.98287
	Os03g0224700|mRNA|AK072571|CDS+3'UTR	Os03g0224700	Similar to HSP protein (Fragment).	3.87568	3.60952	2.30481	2.01314	1.52773
	Os03g0224700|mRNA|AY344490|CDS+3'UTR	Os03g0224700	Similar to HSP protein (Fragment).	29.6471	48.4976	25.8326	8.95081	6.48981
OsHsfA2a	Os03g0745000|mRNA|AF140500|CDS+3'UTR	Os03g0745000	Similar to Heat stress transcription factor A-2a.	252.098	52.2048	20.4263	4.0867	1.55684
	Os03g0745000|mRNA|AK069579|CDS+3'UTR	Os03g0745000	Similar to Heat stress transcription factor A-2a.	316.759	48.5962	18.5024	3.57346	1.91169
	Os03g0745000|mRNA|AK109590|CDS+3'UTR	Os03g0745000	Similar to Heat stress transcription factor A-2a.	196.689	71.8959	27.3125	9.45998	4.00896
	Os03g0745000|mRNA|AY332465|CDS+3'UTR	Os03g0745000	Similar to Heat stress transcription factor A-2a.	215.786	76.8603	21.3661	3.43531	2.70357
	Os03g0745000|mRNA|AY344486|CDS+3'UTR	Os03g0745000	Similar to Heat stress transcription factor A-2a.	289.506	78.9431	23.8688	3.73032	2.54688
OsHsfB2a	Os04g0568700|mRNA|AY344483|CDS+3'UTR	Os04g0568700	Similar to Heat stress transcription factor Spl7 (Heat shock transcription factor) (Heat shock factor RHSF10).	21.3861	4.19208	3.41018	0.708788	0.954778
OsHsfA2f	Os06g0565200|COMBINER_EST|Os06g0565200|8	Os06g0565200	Winged helix repressor DNA-binding domain containing protein.	339.232	93.0847	33.554	8.14939	8.56849
OsHsfB2b	Os08g0546800|mRNA|AK101700|CDS+3'UTR	Os08g0546800	Similar to Heat stress transcription factor B-2b.	68.937	22.6512	19.878	8.24413	5.20199
OsHsfB2c	Os09g0526600|mRNA|AK105409|CDS+3'UTR	Os09g0526600	Similar to Isoform 2 of Heat stress transcription factor B-2c.	17.2656	13.4146	7.91659	2.55864	1.18219
	Os09g0526600|mRNA|AK106525|CDS+3'UTR	Os09g0526600	Similar to Isoform 2 of Heat stress transcription factor B-2c.	16.3413	11.8212	7.35127	2.1147	1.18972
	Os09g0526600|mRNA|AK106545|CDS+3'UTR	Os09g0526600	Similar to Isoform 2 of Heat stress transcription factor B-2c.	10.4401	21.5491	23.8919	19.3542	11.8906
Ref:
Chauhan, H., N. Khurana, et al. (2011). Heat shock factors in rice (Oryza sativa L.): genome-wide expression analysis during reproductive development and abiotic stress. Mol Genet Genomics 286(2): 171-187.

## Sheet: AP2-ERF
Table S4_2 The HR AP2/ERF genes
AP2/ERF	ProbeName	RAP_ID	Annotation (Build 5)	ratio-20 min	ratio-60 min	ratio-2 h	ratio-4 h	ratio-8 h
ERF_B1	Os01g0313300|mRNA|AJ575219|CDS	Os01g0313300	Similar to EREBP-3 protein (Fragment).	5.38088	5.10956	18.6553	4.88669	4.01696
	Os01g0313300|mRNA|AK111775|CDS+3'UTR	Os01g0313300	Similar to EREBP-3 protein (Fragment).	4.67891	5.06944	16.0803	7.72066	6.26834
DREB_A5	Os01g0868000|COMBINER_EST|CI210992|6	Os01g0868000	Hypothetical conserved gene.	4.41385	9.2291	10.5677	1.82788	1.84996
ERF_B1	Os01g0968800|mRNA|AY345234|CDS+3'UTR	Os01g0968800	Similar to Dehydration responsive element binding protein 1F (DREB1F protein).	3.08766	5.16641	3.89592	1.0866	1.5779
ERF_B4	Os02g0546600|mRNA|AK107852|CDS+3'UTR	Os02g0546600	Similar to AP2 domain containing protein RAP2.2 (Fragment).	231.718	204.398	96.5475	4.57244	4.6307
DREB_A4	Os02g0546800|COMBINER|CI226343|6	Os02g0546800	Similar to OSIGBa0093L02.1 protein.	278.452	189.824	73.6204	7.05007	6.15636
ERF_B3	Os02g0654700|mRNA|AK073812|CDS+3'UTR	Os02g0654700	APETALA2 (AP2) gene 59.;Abiotic stress.;AP2/ERF family protein.	4.76646	4.67923	2.18741	2.45208	3.9894
	Os02g0654700|mRNA|AK105940|CDS+3'UTR	Os02g0654700	APETALA2 (AP2) gene 59.;Abiotic stress.;AP2/ERF family protein.	4.99214	4.48281	2.22632	1.96301	3.23685
DREB_A6	Os02g0677300|mRNA|AK060550|CDS+3'UTR	Os02g0677300	Similar to CRT/DRE binding factor 1.	2.03286	0.71312	0.311276	0.0378693	0.245363
DREB_A5	Os02g0764700|mRNA|AK107146|CDS+3'UTR	Os02g0764700	Similar to Ethylene-responsive transcription factor 4 (Ethylene-responsive element binding factor 4) (Related to APETALA-2 protein 5) (EREBP-4) (AtERF4).	3.33454	2.2585	1.28279	0.318703	0.422275
ERF_B2	Os03g0182800|mRNA|AJ304840|CDS+3'UTR	Os03g0182800	Similar to Ethylene responsive element binding factor3 (OsERF3).	8.04686	2.42067	13.1382	4.84843	5.09385
ERF_B3	Os03g0183000|mRNA|AK060929|CDS+3'UTR	Os03g0183000	Hypothetical conserved gene.	0.780529	0.758723	2.39844	5.93519	7.93777
	Os03g0183000|mRNA|AK101949|CDS+3'UTR	Os03g0183000	Similar to AP2 domain containing protein RAP2.6 (Fragment).	0.720412	0.735193	2.28296	5.48645	7.57972
ERF_B3	Os03g0860100|mRNA|AK109390|CDS+3'UTR	Os03g0860100	Similar to Ethylene-responsive transcription factor 2 (Ethylene-responsive element binding factor 2) (EREBP-2) (AtERF2).	0.305486	1.22836	2.51516	1.38574	3.10594
ERF_B4	Os04g0257500|mRNA|AK107745|CDS+3'UTR	Os04g0257500	Similar to Transcription factor TSRF1.	0.215786	0.0601946	0.835174	3.7937	7.53423
ERF_B7	Os05g0361700|mRNA|AJ575218|5'UTR+CDS	Os05g0361700	Similar to ethylene responsive element binding protein 2.	3.05437	1.45155	0.95666	0.241986	0.292531
ERF_B3	Os06g0127100|mRNA|AY327040|CDS+3'UTR	Os06g0127100	Dehydration-responsive element-binding protein 1C.	5.22346	2.60811	1.31569	0.23474	0.505608
ERF_B2	Os06g0181700|mRNA|AK108355|CDS+3'UTR	Os06g0181700	Pathogenesis-related transcriptional factor and ERF domain containing protein.	0.387792	0.560712	0.57731	0.279516	0.241885
ERF_B1	Os07g0617000|mRNA|AK061047|CDS+3'UTR	Os07g0617000	Similar to Ethylene response factor 2.	0.334964	0.726279	1.56717	3.47468	4.17232
	Os07g0617000|mRNA|AK067060|CDS+3'UTR	Os07g0617000	Similar to Ethylene response factor 2.	0.301502	0.698196	1.65701	4.08999	4.37818
	Os07g0617000|mRNA|AK109360|CDS+3'UTR	Os07g0617000	Similar to Ethylene response factor 2.	0.241994	0.670188	1.54036	3.55909	3.94682
ERF_B1	Os07g0674800|mRNA|AY297447|CDS+3'UTR	Os07g0674800	Similar to AP2 domain transcription factor EREBP.	3.7487	3.16321	41.0248	0.298264	0.486076
AP2_AP2	Os08g0442400|mRNA|AK106769|CDS+3'UTR	Os08g0442400	Similar to BABY BOOM.	1.23752	2.57398	1.1295	0.251626	0.303095
ERF_B7	Os08g0474000|mRNA|AK062882|CDS+3'UTR	Os08g0474000	Similar to AP2 domain containing protein RAP2.6 (Fragment).	1.35924	3.15202	0.888763	0.033733	0.203037
ERF_B2	Os09g0286600|mRNA|AK065344|CDS+3'UTR	Os09g0286600	Pathogenesis-related transcriptional factor and ERF domain containing protein.	1.2097	0.957867	0.823584	0.320406	0.160338
ERF_B2	Os09g0287000|mRNA|AK068688|CDS+3'UTR	Os09g0287000	Similar to Ethylene-responsive transcription factor 5 (Ethylene-responsive element binding factor 5) (EREBP-5) (AtERF5).	0.882631	1.42265	3.68225	13.3419	8.05807
	Os09g0287000|mRNA|AK106057|CDS+3'UTR	Os09g0287000	Similar to Ethylene-responsive transcription factor 5 (Ethylene-responsive element binding factor 5) (EREBP-5) (AtERF5).	0.865785	1.40497	3.43081	12.5355	7.70857
DREB_A1	Os09g0522200|mRNA|AF300970|CDS+3'UTR	Os09g0522200	DRE-binding protein 1A.	3.53915	2.31121	0.886984	0.276522	0.545798
	Os09g0522200|mRNA|AF494422|CDS	Os09g0522200	DRE-binding protein 1A.	4.82419	2.86808	1.13361	0.263573	0.547535
	Os09g0522200|mRNA|AK071519|CDS+3'UTR	Os09g0522200	DRE-binding protein 1A.	3.65621	2.30632	0.806686	0.286689	0.570187
	Os09g0522200|mRNA|AK105599|CDS+3'UTR	Os09g0522200	DRE-binding protein 1A.	3.61304	2.32037	0.974197	0.278106	0.582169
	Os09g0522200|mRNA|AY345233|CDS+3'UTR	Os09g0522200	DRE-binding protein 1A.	3.97571	2.51547	1.03206	0.313559	0.632935
ERF_B3	Os09g0572000|COMBINER|CI430380|3	Os09g0572000	Pathogenesis-related transcriptional factor and ERF domain containing protein.	7.31483	7.33029	1.51326	0.739052	1.26856
	Os09g0572000|COMBINER|CI430380|x	Os09g0572000	Pathogenesis-related transcriptional factor and ERF domain containing protein.	14.8086	14.8324	4.06007	1.75898	1.90804
NF	Os12g0168100|mRNA|AK107125|CDS+3'UTR	Os12g0168100	Similar to AP2 domain containing protein RAP2.6 (Fragment).	0.31486	4.11622	2.16653	1.72893	1.80893
NF means not found in GramineaeTFDB (Mochida K. et al.,2011)
Ref:
Sharoni, A. M., M. Nuruzzaman, et al. (2011). Gene structures, classification and expression models of the AP2/EREBP transcription factor family in rice. Plant Cell Physiol 52(2): 344-360.
Mochida K, Yoshida T, Sakurai T, Yamaguchi-Shinozaki K, Shinozaki K, Tran LS. (2011). In silico analysis of transcription factor repertoires and prediction of stress-responsive transcription factors from six major gramineae plants. DNA Res 18(5):321-32.

## Sheet: bHLH
Table S4_3 The HR bHLH family genes
bHLH	ProbeName	RAP_ID	Annotation (Build 5)	ratio-20 min	ratio-60 min	ratio-2 h	ratio-4 h	ratio-8 h
Os064	Os02g0433600|mRNA|AK069790|CDS+3'UTR	Os02g0433600	Helix-loop-helix DNA-binding domain containing protein.	0.398961	0.281411	0.318868	0.314715	0.489821
	Os02g0433600|mRNA|AK103986|CDS+3'UTR	Os02g0433600	Helix-loop-helix DNA-binding domain containing protein.	0.419515	0.278337	0.341919	0.299473	0.502051
Os034	Os02g0726700|mRNA|AK068228|CDS+3'UTR	Os02g0726700	Helix-loop-helix DNA-binding domain containing protein.	0.394919	0.275504	0.246793	0.145725	0.269978
Os003	Os03g0135700|mRNA|AK103779|CDS+3'UTR	Os03g0135700	Transcriptional activator Rb homolog (Fragment).	0.816878	0.517936	0.416788	0.174819	0.215035
Os044	Os03g0188400|mRNA|AK107555|CDS+3'UTR	Os03g0188400	Helix-loop-helix DNA-binding domain containing protein.	1.23645	2.22989	2.53535	0.232478	0.166952
Os066	Os03g0759700|mRNA|AK072833|CDS+3'UTR	Os03g0759700	Similar to ER33 protein (Fragment).	0.612524	0.502377	0.302304	0.295113	0.430372
Os006RERJ	Os04g0301500|mRNA|AB040744|CDS+3'UTR	Os04g0301500	Helix-loop-helix DNA-binding domain containing protein.	1.11195	3.93501	1.23073	0.135191	0.123739
Os144	Os04g0429400|mRNA|AK108728|CDS+3'UTR	Os04g0429400	Helix-loop-helix DNA-binding domain containing protein.	0.288343	0.290412	0.375268	1.14883	0.840009
Os172	Os06g0226500|mRNA|AK071601|CDS+3'UTR	Os06g0226500	Brassinosteroid upregulated1.;Brassinosteroid signaling.;Helix-loop-helix protein.	0.338198	0.80372	0.932577	0.299316	0.224854
Os087	Os08g0487700|COMBINER_EST|CB632341|7	Os08g0487700	Similar to TA1 protein (Fragment).	3.7647	4.2824	2.63284	1.69806	1.64136
Ref:
Carretero-Paulet, L., A. Galstyan, et al. (2010). Genome-wide classification and evolutionary analysis of the bHLH family of transcription factors in Arabidopsis, poplar, rice, moss, and algae. Plant Physiol 153(3): 1398-1412.

## Sheet: bZIP
Table S4_4 The HR bZIP family genes
bZIP	ProbeName	RAP_ID	Annotation (Build 5)	ratio-20 min	ratio-60 min	ratio-2 h	ratio-4 h	ratio-8 h
OsbZIP04-IV	Os01g0542700|mRNA|AK110526|CDS+3'UTR	Os01g0542700	bZIP transcription factor, bZIP-1 domain containing protein.	8.2714	2.93895	0.87762	0.27852	0.253154
OsbZIP12-VI	Os01g0867300|mRNA|AK067919|CDS+3'UTR	Os01g0867300	Similar to OSE2-like protein (Fragment).	3.61778	4.51777	4.51059	2.43672	2.88165
	Os01g0867300|mRNA|U25283|CDS+3'UTR	Os01g0867300	Similar to OSE2-like protein (Fragment).	3.29315	4.59436	4.42189	2.5084	2.79583
OsbZIP16-IV	Os02g0191600|COMBINER_EST|Os02g0191600|8	Os02g0191600	bZIP transcription factor, bZIP-1 domain containing protein.	0.189616	0.201606	0.237343	0.182974	0.250377
OsbZIP18-II	Os02g0203000|COMBINER_EST|AU096937|7	Os02g0203000	Similar to transcription factor HY5.	0.826967	1.40426	1.23654	0.307815	0.310285
OsbZIP24-VI	Os02g0833600|mRNA|AK061086|CDS+3'UTR	Os02g0833600	Similar to Basic leucine zipper transcription factor (Fragment).	6.40432	6.53326	4.8659	2.55994	2.58796
OsbZIP25-IX	Os03g0127500|COMBINER_EST|C98212|6	Os03g0127500	bZIP transcription factor, bZIP-1 domain containing protein.	1.42267	1.11803	0.564857	0.309409	0.215369
OsbZIP45-I	Os05g0569300|mRNA|AK065440|CDS+3'UTR	Os05g0569300	Similar to G-box binding factor 1.	2.25756	3.79506	3.34127	1.97346	2.2749
OsbZIP50-III	Os06g0622700|mRNA|AK107021|CDS+3'UTR	Os06g0622700	bZIP transcription factor, bZIP-1 domain containing protein.	7.17848	8.32147	3.31211	2.11674	1.67191
OsbZIP52-IV	Os06g0662200|mRNA|AB053474|CDS+3'UTR	Os06g0662200	bZIP transcription factor, bZIP-1 domain containing protein.	1.91925	1.24178	0.752621	0.154621	0.188788
OsbZIP60-III	Os07g0644100|mRNA|AK121898|CDS+3'UTR	Os07g0644100	bZIP transcription factor, bZIP-1 domain containing protein.	5.32722	4.12288	3.17087	1.96172	1.61954
OsbZIP63-VII	Os07g0687700|mRNA|AB051295|CDS+3'UTR	Os07g0687700	Similar to Transcription factor HBP-1b(C38) (Fragment).	1.18797	0.670431	0.552653	0.234519	0.196909
	Os07g0687700|mRNA|AK100440|CDS+3'UTR	Os07g0687700	Similar to Transcription factor HBP-1b(C38) (Fragment).	1.16129	0.731247	0.625369	0.191987	0.161343
OsbZIP65-IV	Os08g0357300|mRNA|AK100580|CDS+3'UTR	Os08g0357300	Similar to BZIP DNA-binding protein.	0.401857	0.53124	0.384904	0.30019	0.284833
OsbZIP66-VI	Os08g0472000|mRNA|AK062347|CDS+3'UTR	Os08g0472000	Similar to bZIP transcription factor TRAB1.	5.68845	4.69648	3.30026	2.74913	2.02918
Ref:
Nijhawan, A., M. Jain, et al. (2008). Genomic survey and gene expression analysis of the basic leucine zipper transcription factor family in rice. Plant Physiol 146(2): 333-350.

## Sheet: MYB
Table S4_5 The HR Myb family genes
Myb	ProbeName	RAP_ID	Annotation (Build 5)	ratio-20 min	ratio-60 min	ratio-2 h	ratio-4 h	ratio-8 h
(R1)R2R3_Myb	Os01g0637800|COMBINER_EST|CI105260|6	Os01g0637800	Similar to MYB8 protein.	0.972681	3.49132	3.28122	1.76952	2.24935
	Os01g0695900|mRNA|AK108259|CDS+3'UTR	Os01g0695900	OSMYB4.	6.8649	2.54993	5.93415	2.06954	2.30988
	Os01g0850400|mRNA|AJ575220|5'UTR+CDS	Os01g0850400	Similar to MYBY1 protein (Fragment).	5.6002	3.84581	2.84774	2.1225	1.42562
	Os01g0850400|mRNA|AK108582|CDS+3'UTR	Os01g0850400	Similar to MYBY1 protein (Fragment).	6.76755	4.06303	2.5992	2.815	1.69774
	Os02g0114800|COMBINER_EST|Os02g0114800|8	Os02g0114800	Similar to MYB1.	1.18991	0.896462	1.36697	21.6146	28.8363
	Os08g0151300|mRNA|AK111808|CDS+3'UTR	Os08g0151300	Myb transcription factor domain containing protein.	0.297759	0.316153	1.21563	0.904538	1.37287
	Os08g0549000|COMBINER_EST|CI473176|0	Os08g0549000	Similar to MybHv5 (Fragment).	1.0308	2.66236	3.98635	1.93058	3.06096
	Os09g0532900|mRNA|AK106039|CDS+3'UTR	Os09g0532900	Myb transcription factor domain containing protein.	0.432698	0.15756	0.218782	1.04687	0.648807
	Os09g0532900|mRNA|AK106873|UTR	Os09g0532900	Hypothetical conserved gene.	0.678462	0.411221	0.300949	0.376858	0.317199
	Os11g0207600|COMBINER_EST|AU032361|6	Os11g0207600	Myb-like protein.	0.0871684	0.0937502	0.581951	1.22355	2.26632
	Os12g0238000|COMBINER_EST|Os12g0238000|8	Os12g0238000	Similar to Myb-like DNA-binding domain containing protein, expressed.	0.868468	0.330575	0.283072	0.202509	0.228451
MYB_related	Os01g0187900|mRNA|AK071611|CDS+3'UTR	Os01g0187900	Similar to Transcription factor MYBS2.	3.33129	2.5502	2.64182	3.43199	2.19822
	Os01g0603300|mRNA|AK061500|CDS+3'UTR	Os01g0603300	Similar to MCB2 protein.	3.44534	3.43067	2.82596	1.05946	0.956723
	Os01g0603300|mRNA|AK103432|CDS+3'UTR	Os01g0603300	Similar to MCB2 protein.	4.16631	4.12063	3.00137	0.868283	0.925145
	Os01g0863300|mRNA|AK111571|CDS+3'UTR	Os01g0863300	Similar to MCB2 protein.	9.08172	5.24357	4.50705	1.65284	2.52715
	Os05g0162800|COMBINER|CI419838|6	Os05g0162800	Hypothetical conserved gene.	3.36177	14.3022	2.78578	0.393357	0.369335
	Os05g0162800|COMBINER|CI419838|x	Os05g0162800	Hypothetical conserved gene.	3.30536	13.7782	2.60173	0.377629	0.295482
	Os05g0442400|mRNA|AK107134|CDS+3'UTR	Os05g0442400	Similar to MybSt1.	0.781711	3.80503	4.15756	0.655646	0.780642
	Os05g0579600|COMBINER_EST|CI437851|0	Os05g0579600	Homeodomain-like containing protein.	1.11665	0.168123	0.856689	0.217618	0.18682
	Os07g0443500|COMBINER_EST|Os07g0443500|8	Os07g0443500	Molecular chaperone, heat shock protein, Hsp40, DnaJ domain containing protein.	0.548513	0.223913	0.1008	0.102215	0.122435
	Os08g0157600|mRNA|AK104073|CDS+3'UTR	Os08g0157600	Similar to LHY protein.	1.1072	0.909899	0.646131	0.0310025	0.00877322
	Os08g0157600|mRNA|AK111893|CDS+3'UTR	Os08g0157600	Similar to LHY protein.	1.10392	0.893137	0.609303	0.0317732	0.00853423
	Os08g0157600|mRNA|AK121547|CDS+3'UTR	Os08g0157600	Similar to LHY protein.	1.2039	0.954776	0.649524	0.0258553	0.00759138
	Os08g0157600|mRNA|AY452478|CDS+3'UTR	Os08g0157600	Similar to LHY protein.	1.04464	0.93456	0.714832	0.0396703	0.0127534
atypical_MYB	Os02g0685200|mRNA|AK111726|CDS+3'UTR	Os02g0685200	Homeodomain-like containing protein.	9.835	9.35183	3.05756	0.32777	0.451838
	Os04g0583900|mRNA|AK101209|CDS+3'UTR	Os04g0583900	Similar to LHY protein.	9.73503	4.98772	2.72723	0.235941	0.178004
	Os06g0728700|mRNA|AK111637|CDS+3'UTR	Os06g0728700	Homeodomain-like containing protein.	3.72082	2.63864	2.35686	0.152268	0.0941563
	Os06g0728700|mRNA|AK119632|CDS+3'UTR	Os06g0728700	Homeodomain-like containing protein.	3.87009	2.66244	2.50555	0.161072	0.100996
NF	Os02g0786400|COMBINER_EST|Os02g0786400|8	Os02g0786400	Similar to predicted protein.	0.567962	0.419583	0.314217	0.128046	0.18121
	Os04g0470600|COMBINER_EST|CI068812|0	Os04g0470600	Myb-related transcription factor LBM2.	0.246482	0.148187	1.55218	1.62224	2.53407
	Os04g0607200|mRNA|AK071573|UTR	Os04g0607200	Hypothetical conserved gene.	3.33618	3.66187	2.07896	1.72878	1.48789
	Os06g0669700|mRNA|AJ495798|CDS+3'UTR	Os06g0669700	Similar to Myb-related protein.	5.72538	3.31671	1.66208	0.777576	0.601477
	Os07g0137000|mRNA|AK110988|CDS+3'UTR	Os07g0137000	Myb transcription factor domain containing protein.	1.96185	2.60914	2.95542	5.39392	5.50289
NF means not found in GramineaeTFDB (Mochida K. et al.,2011)
Ref:
Mochida K, Yoshida T, Sakurai T, Yamaguchi-Shinozaki K, Shinozaki K, Tran LS. (2011). In silico analysis of transcription factor repertoires and prediction of stress-responsive transcription factors from six major gramineae plants. DNA Res 18(5):321-32.

## Sheet: WRKY
Table S4_6 The HR WRKY family genes
WRKY	Group	ProbeName	RAP_ID	Annotation (Build 5)	ratio-20 min	ratio-60 min	ratio-2 h	ratio-4 h	ratio-8 h
OsWRKY01	Group IIe	Os01g0246700|mRNA|AK105509|CDS+3'UTR	Os01g0246700	Similar to WRKY transcription factor 1.	2.43146	3.02757	1.54988	3.1152	2.07017
		Os01g0246700|mRNA|AY676928|CDS	Os01g0246700	Similar to WRKY transcription factor 1.	2.06263	1.60489	1.40486	5.95141	12.0613
OsWRKY12	Group II	Os01g0624700|mRNA|AK111416|CDS+3'UTR	Os01g0624700	Similar to WRKY transcription factor 12.	8.93281	3.56622	1.97186	0.775358	1.0054
		Os01g0624700|mRNA|AY676924|CDS	Os01g0624700	Similar to WRKY transcription factor 12.	6.40649	3.69879	2.25384	1.38935	1.43942
OsWRKY21	Group III	Os01g0821600|mRNA|AK108657|CDS+3'UTR	Os01g0821600	WRKY transcription factor 48-like protein (WRKY transcription factor 21).	1.01179	0.698932	0.287651	0.159084	0.322767
OsWRKY24	Group Ia	Os01g0826400|mRNA|AK107199|CDS+3'UTR	Os01g0826400	WRKY transcription factor 24 (WRKY24).	5.30775	16.9067	3.14338	4.58594	1.78069
		Os01g0826400|mRNA|AY341849|CDS+3'UTR	Os01g0826400	WRKY transcription factor 24 (WRKY24).	5.57706	18.9639	3.42101	4.90173	1.83556
		Os01g0826400|mRNA|AY676925|CDS	Os01g0826400	WRKY transcription factor 24 (WRKY24).	5.74516	13.8399	3.1555	2.96887	1.72704
OsWRKY07	Group II	Os05g0537100|COMBINER_EST|CI430861|0	Os05g0537100	WRKY transcription factor 10.	4.76736	8.75924	4.44008	3.55447	5.11247
OsWRKY28	Group II	Os06g0649000|mRNA|AK106282|CDS+3'UTR	Os06g0649000	Similar to WRKY transcription factor 28.	1.97652	9.53547	4.22603	0.771466	0.433276
		Os06g0649000|mRNA|AK119644|CDS+3'UTR	Os06g0649000	Similar to WRKY transcription factor 28.	1.79333	9.28998	3.78884	0.743689	0.315809
OsWRKY47	Group III	Os07g0680400|mRNA|AK110900|CDS+3'UTR	Os07g0680400	DNA-binding WRKY domain containing protein.	0.70431	0.297551	0.375929	0.153336	0.365676
OsWRKY82	Group Ia	Os08g0276200|mRNA|AK073491|5'UTR+CDS	Os08g0276200	Similar to WRKY transcription factor 44 (WRKY DNA-binding protein 44) (TRANSPARENT TESTA GLABRA 2).	3.43123	4.25084	1.95646	1.32844	1.01413
OsWRKY69	Group III	Os08g0386200|mRNA|AK111606|CDS+3'UTR	Os08g0386200	WRKY transcription factor 69.	5.15908	11.3243	1.80496	4.03019	2.40967
		Os08g0386200|mRNA|AY676931|CDS	Os08g0386200	WRKY transcription factor 69.	3.56692	7.64034	1.74563	3.17109	2.56725
OsWRKY100	Group III	Os11g0117400|COMBINER_EST|CI444468|6	Os11g0117400	DNA-binding WRKY domain containing protein.	3.14775	3.90225	3.65	4.02842	3.95351
OsWRKY56	Group III	Os12g0116600|mRNA|AK102093|CDS+3'UTR	Os12g0116600	Similar to Transcription factor (Fragment).	3.30366	3.8361	3.69252	5.5525	4.99267
Group Ia: two WRKY domains, each with a C2H2 zinc finger or one with a C2-- and the other with a C2H2 finger;
Group II: one WRKY domain with a C2H2 finger; Group III: one WRKY domain with a C2HC finger.
Ref:
Rushton, P. J., I. E. Somssich, et al. (2010). WRKY transcription factors. Trends Plant Sci 15(5): 247-258.

## Sheet: NAC
Table S4_7 HR NAC family genes
NAC	ProbeName	RAP_ID	Annotation (Build 5)	ratio-20 min	ratio-60 min	ratio-2 h	ratio-4 h	ratio-8 h
SNAC_B	Os01g0816100|mRNA|AB028183|CDS+3'UTR	Os01g0816100	Similar to NAC domain protein.	0.959248	3.24875	4.47061	3.26361	4.1529
	Os01g0816100|mRNA|AK073848|CDS+3'UTR	Os01g0816100	Similar to NAC domain protein.	0.93462	3.07126	4.14895	3.49691	4.23356
SNAC_B	Os01g0884300|mRNA|AB028185|CDS+3'UTR	Os01g0884300	No apical meristem(NAM) protein domain containing protein.	1.47136	2.91249	4.85047	2.21087	4.20605
	Os01g0884300|mRNA|AK068392|CDS+3'UTR	Os01g0884300	No apical meristem(NAM) protein domain containing protein.	1.31866	2.63117	4.27826	2.4496	4.5691
ANAC34_B	Os03g0133000|mRNA|AK107090|CDS+3'UTR	Os03g0133000	Similar to NAC-domain protein 14.	3.79999	3.0429	1.15962	0.828752	0.672197
SNAC_B	Os03g0815100|mRNA|AK067690|CDS+3'UTR	Os03g0815100	Similar to OsNAC6 protein.	2.51472	3.17361	3.08734	1.75567	2.67419
ONAC4_A	Os04g0477300|mRNA|AK108082|CDS+3'UTR	Os04g0477300	No apical meristem(NAM) protein domain containing protein.	1.41184	1.87056	2.057	3.70254	4.29442
SND_B	Os06g0131700|mRNA|AK119784|CDS+3'UTR	Os06g0131700	Similar to NAM protein.	0.168174	0.32152	0.524831	1.21786	1.2919
NAM/CUC3_B	Os07g0684800|mRNA|AK105645|CDS+3'UTR	Os07g0684800	Similar to NAM / CUC2-like protein.	0.649608	0.747119	2.33536	3.18297	4.41881
NAC1_B	Os08g0200600|mRNA|AK105596|CDS+3'UTR	Os08g0200600	Hypothetical conserved gene.	0.223618	0.445019	1.45173	2.59496	5.72803
NF	Os10g0413900|mRNA|AK110942|CDS+3'UTR	Os10g0413900	No apical meristem(NAM) protein domain containing protein.	0.789992	0.53226	0.647474	0.274308	0.229253
NAC22_B	Os10g0477600|mRNA|AK119558|CDS+3'UTR	Os10g0477600	Similar to NAM / CUC2-like protein.	1.04651	2.17692	3.46932	3.38867	3.14972
SNAC_B	Os11g0126900|mRNA|AK069257|CDS+3'UTR	Os11g0126900	Oryza sativa NAM, ATAF1-2, and CUC2 domain gene 10.;Drought tolerance.;NAC-domain protein.	0.524389	1.04773	3.9072	4.43571	8.22187
ONAC7_A	Os11g0154500|mRNA|AK106277|CDS+3'UTR	Os11g0154500	No apical meristem(NAM) protein domain containing protein.	0.3979	0.464983	5.90228	2.25729	5.51764
ONAC7_A	Os12g0156100|mRNA|AK109534|CDS+3'UTR	Os12g0156100	Similar to NAC-domain containing protein 90 (ANAC090).	0.761167	0.261978	0.0999698	0.129555	0.161421
NF means not found
Ref:
Nuruzzaman, M., R. Manimekalai, et al. (2010). Genome-wide analysis of NAC transcription factor family in rice. Gene 465(1-2): 30-44.

## Sheet: C2H2
Table S4_8 The HR C2H2 family genes
C2H2	ProbeName	RAP_ID	Annotation (Build 5)	ratio-20 min	ratio-60 min	ratio-2 h	ratio-4 h	ratio-8 h
ZOS1-06	Os01g0251200|mRNA|AK108417|5'UTR+CDS	Os01g0251200	Hypothetical conserved gene.	5.35928	5.53302	3.81299	2.3998	1.49103
ZOS1-22	Os01g0909500|mRNA|AK119276|CDS+3'UTR	Os01g0909500	Similar to cDNA clone:J013116D08, full insert sequence.	1.02212	1.55512	2.01501	4.3492	3.49725
ZOS3-21	Os03g0820300|mRNA|AK068861|CDS+3'UTR	Os03g0820300	Similar to ZPT2-14.	12.4657	12.3058	6.71947	5.84719	8.47342
	Os03g0820300|mRNA|AY286474|CDS+3'UTR	Os03g0820300	Similar to ZPT2-14.	7.78856	7.42542	4.16094	2.92405	4.33713
ZOS3-22a	Os03g0820400|mRNA|AK119690|CDS+3'UTR	Os03g0820400	Similar to ZPT2-13.	3.22357	1.29465	0.700761	0.141057	0.387948
	Os03g0820400|mRNA|AY305864|CDS+3'UTR	Os03g0820400	Similar to ZPT2-13.	3.44894	1.29747	0.61938	0.152799	0.383694
ZOS4-02b	Os04g0162100|mRNA|AK069556|CDS+3'UTR	Os04g0162100	Similar to EMF protein.	5.93972	5.03702	1.45183	1.49805	0.983863
ZOS4-14	Os04g0690100|mRNA|AK099856|CDS+3'UTR	Os04g0690100	Zinc finger, C2H2-type domain containing protein.	0.441859	0.473568	0.372029	0.285249	0.326078
ZOS5-06	Os05g0279400|mRNA|AK102650|CDS+3'UTR	Os05g0279400	Zinc finger, RING-type domain containing protein.	7.92482	4.72483	3.18151	1.75484	1.12844
ZOS5-11	Os05g0495100|mRNA|AK108028|CDS+3'UTR	Os05g0495100	Zinc finger, C2H2-type domain containing protein.	2.63731	3.00179	2.88216	3.72924	2.68697
ZOS6-06	Os06g0651300|mRNA|AK073865|CDS+3'UTR	Os06g0651300	Zinc finger, U1-type domain containing protein.	1.46211	1.76812	2.14894	3.47726	3.25849
ZOS11-06	Os11g0596200|COMBINER_EST|CI439015|6	Os11g0596200	Hypothetical conserved gene.	4.21803	5.14783	3.93668	1.48745	1.02014
ZOS12-09	Os12g0583700|mRNA|AY219847|CDS+3'UTR	Os12g0583700	Zinc finger, C2H2-type domain containing protein.	2.48804	3.13259	3.91929	2.43133	3.38117
aZFP15 (Huang et al, 2005)
bOsEMF2 (Li et al, 2006)
Ref:
Huang J, Wang J, Zhang H. (2005). Rice ZFP15 gene encoding for a novel C2H2-type zinc finger protein lacking DLN box, is regulated by spike development but not by abiotic stresses. Mol Biol Rep 32:177–183.
Li K, Yang J, Liu J, Du X, Wei C, Su W, He G, Zhang Q, Hong F, Qian X. (2006). Cloning, characterization and tissue-specific expression of a cDNA encoding a novel EMBRYONIC FLOWER 2 gene (OsEMF2) in Oryza sativa. DNA Seq 17:74–78.
