# Supplementary material for: Expression Profile in Rice Panicle: Insights into Heat Response Mechanism at Reproductive Stage
Source: PLoS One. 2012 Nov 14;7(11):e49652. doi: 10.1371/journal.pone.0049652 (PMC3498232; doi:10.1371/journal.pone.0049652)
Supplement: Table S5 — The HR Hsp and other chaperone genes. (XLSX) [file pone.0049652.s005.xlsx]

## Sheet: Hsp
Table S5_1 The HR Hsp genes
Classification	ProbeName	RAP_ID	Annotation (Build 5)	ratio-20 min	ratio-60 min	ratio-2 h	ratio-4 h	ratio-8 h
hsp100	Os02g0181900|COMBINER_EST|AU172375|7	Os02g0181900	Similar to ClpB.	20.5352	15.7462	6.81837	2.78888	1.49892
	Os03g0426900|mRNA|AK060637|CDS+3'UTR	Os03g0426900	Similar to APG6/CLPB-P/CLPB3 (ALBINO AND PALE GREEN 6); ATP binding / ATPase.	15.3967	9.99701	4.43427	1.73331	1.18866
	Os03g0426900|mRNA|AK069123|CDS+3'UTR	Os03g0426900	Similar to Heat shock protein 101.	8.14086	4.90978	3.21431	1.8187	1.34021
	Os05g0519700|mRNA|AF332981|CDS+3'UTR	Os05g0519700	Similar to Heat shock protein 101.	15.0634	13.6622	10.5199	4.74496	2.7211
	Os05g0519700|mRNA|AK100903|CDS+3'UTR	Os05g0519700	Heat shock protein 101.	14.8743	14.4395	10.5932	4.94047	2.74792
	Os05g0519700|mRNA|AK105433|CDS+3'UTR	Os05g0519700	Heat shock protein 101.	21.1133	17.2452	11.9599	5.81543	2.96589
	Os05g0519700|mRNA|AK121414|CDS+3'UTR	Os05g0519700	Similar to Heat shock protein 101.	7.60577	7.01888	7.58698	3.77505	2.42479
hsp70	Os01g0180800|mRNA|AK059244|5'UTR+CDS	Os01g0180800	Similar to heat shock 70 kDa protein 4.	14.6839	5.53027	2.11533	1.07444	0.568739
	Os01g0840100|COMBINER_EST|CI273581|6	Os01g0840100	Heat shock protein Hsp70 family protein.	3.23599	3.18135	2.85288	2.03694	1.79314
	Os03g0113700|mRNA|AK103835|CDS+3'UTR	Os03g0113700	Similar to Heat shock 70 kDa protein, mitochondrial precursor.	6.79424	6.98011	5.00326	3.97301	2.63376
	Os03g0218500|mRNA|AK102685|CDS+3'UTR	Os03g0218500	Similar to 70kD heat shock protein.	15.3566	17.3543	10.864	6.71114	3.95823
	Os03g0276500|mRNA|AK072830|CDS+3'UTR	Os03g0276500	Similar to Heat shock protein 70.	8.65953	3.82604	1.6997	1.11301	0.935182
	Os03g0276500|mRNA|AK099275|CDS+3'UTR	Os03g0276500	Similar to Heat shock protein 70.	10.9793	3.62533	1.40354	1.18611	0.933015
	Os03g0276500|mRNA|AK109474|CDS+3'UTR	Os03g0276500	Similar to Heat shock protein 70.	8.46671	4.227	1.3482	1.18319	0.996962
	Os03g0277300|COMBINER_EST|CI066180|3	Os03g0277300	Heat shock protein 70.	89.6042	110.352	66.6968	23.3086	12.6297
	Os03g0710500|COMBINER_EST|Os03g0710500|8	Os03g0710500	Similar to Luminal binding protein.	81.7967	140.681	25.6187	6.38401	6.36237
	Os05g0303000|mRNA|AK060410|CDS+3'UTR	Os05g0303000	Similar to Stromal 70 kDa heat shock-related protein, chloroplast (Fragment).	6.28518	3.71498	2.15822	1.30017	1.07379
	Os05g0367800|COMBINER_EST|Os05g0367800|8	Os05g0367800	Similar to Luminal binding protein 2 precursor (BiP2) (Heat shock protein 70 homolog 2) (B70) (B-70).	4.20497	6.08251	2.56485	1.48572	1.78195
	Os05g0428600|mRNA|AK106696|CDS+3'UTR	Os05g0428600	Similar to HSP70 precursor.	0.631374	3.85263	3.84255	0.758269	4.64705
	Os05g0460000|COMBINER_EST|CI368692|0	Os05g0460000	Similar to 70 kDa heat shock cognate protein 1.	63.3595	39.9562	17.6723	5.43667	2.98901
hsp90	Os04g0107900|mRNA|AK063568|5'UTR+CDS	Os04g0107900	Heat shock protein 81-1 (HSP81-1) (Heat shock protein 83).	102.194	90.6948	41.0233	8.14945	5.3426
	Os04g0107900|mRNA|AK063629|CDS+3'UTR	Os04g0107900	Similar to Heat shock protein 82.	109.999	120.123	80.1659	40.1086	15.2634
	Os04g0107900|mRNA|AK063698|CDS+3'UTR	Os04g0107900	Similar to Heat shock protein 82.	26.5984	27.4693	26.3146	19.1769	10.2592
	Os04g0107900|mRNA|AK063751|CDS+3'UTR	Os04g0107900	Similar to Heat shock protein 80.	24.1833	23.283	25.2697	16.5802	9.92018
	Os04g0107900|mRNA|AK105370|CDS+3'UTR	Os04g0107900	Similar to Heat shock protein 82.	94.9899	125.357	79.42	37.4041	14.4115
	Os06g0716700|mRNA|AK063385|5'UTR+CDS	Os06g0716700	Similar to Heat shock protein 90.	3.79632	6.96393	3.86528	1.23908	0.592026
	Os08g0487800|mRNA|AK122102|CDS+3'UTR	Os08g0487800	Similar to Heat-shock protein precursor.	6.66478	6.90387	3.05198	2.60134	1.93004
	Os09g0474300|mRNA|AK073817|CDS+3'UTR	Os09g0474300	Similar to Heat-shock protein precursor.	16.5996	9.12557	3.36332	1.77098	0.854034
	Os09g0482400|mRNA|D10428|CDS	Os09g0482400	Heat shock protein 82.	3.56922	3.68601	2.42286	2.59329	2.30392
	Os12g0514500|mRNA|AK059704|CDS+3'UTR	Os12g0514500	Similar to ATP binding.	5.22951	5.3897	3.03771	2.33265	1.36244
	Os12g0514500|mRNA|AK067032|CDS+3'UTR	Os12g0514500	Similar to ATP binding.	5.20006	5.40111	3.14233	2.26005	1.38339
	Os12g0514500|mRNA|AK069204|CDS+3'UTR	Os12g0514500	Similar to Heat-shock protein precursor.	6.94583	6.35893	3.27617	3.0378	1.68067
shsp	Os01g0135800|mRNA|AK063681|CDS+3'UTR	Os01g0135800	Similar to Cytosolic class I small heat shock protein 3B (Fragment).	155.381	344.191	165.469	24.0849	8.10329
	Os01g0135900|mRNA|AK119599|CDS+3'UTR	Os01g0135900	LMW heat shock protein.	0.454547	1.04708	2.13488	3.30209	3.60124
	Os01g0136000|COMBINER_EST|CI053053|0	Os01g0136000	Similar to Cytosolic class I small heat-shock protein HSP17.5.	18.7695	20.1978	19.5785	13.8847	6.22656
	Os01g0136100|mRNA|X60820|CDS+3'UTR	Os01g0136100	16.9 kDa class I heat shock protein 1.	11.9465	13.4389	13.0541	12.396	8.1436
	Os01g0136200|mRNA|AK121025|CDS+3'UTR	Os01g0136200	16.9 kDa class I heat shock protein 1.	30.8109	25.7106	22.3	11.7774	4.06163
	Os01g0184100|mRNA|AK071240|CDS+3'UTR	Os01g0184100	Similar to 17.5 kDa class II heat shock protein.	8.04395	7.88171	7.92824	7.24002	4.73646
	Os02g0201000|mRNA|AK106682|CDS+3'UTR	Os02g0201000	Conserved hypothetical protein.	125.294	125.71	24.5385	6.30825	3.28385
	Os02g0217900|COMBINER_EST|Os02g0217900|8	Os02g0217900	Similar to Cytosolic class II small heat shock protein 4 (Fragment).	18.0077	16.6365	15.4035	9.41653	3.14126
	Os02g0711300|mRNA|AK107963|CDS+3'UTR	Os02g0711300	Heat shock protein Hsp20 domain containing protein.	141.342	97.2779	35.3792	12.4961	3.80662
	Os02g0758000|mRNA|AK064389|CDS+3'UTR	Os02g0758000	Similar to Low molecular weight heat shock protein precursor (Mitochondrial small heat shock protein 22).	179.731	65.9004	38.0195	19.3389	23.2799
	Os02g0758000|mRNA|AK074003|CDS+3'UTR	Os02g0758000	Similar to Low molecular weight heat shock protein precursor (Mitochondrial small heat shock protein 22).	13.1942	10.8517	13.3292	10.9187	8.0557
	Os02g0758000|mRNA|AK105464|CDS+3'UTR	Os02g0758000	Similar to Low molecular weight heat shock protein precursor (Mitochondrial small heat shock protein 22).	160.733	86.6576	43.5725	22.3517	12.6183
	Os02g0782500|mRNA|AK063602|CDS+3'UTR	Os02g0782500	Similar to 17.5 kDa class II heat shock protein.	23.4328	23.5401	22.5196	9.09812	5.09337
	Os02g0782500|mRNA|AK119261|CDS+3'UTR	Os02g0782500	Similar to Small heat stress protein class CIII.	16.7723	18.1166	14.7852	8.12631	4.47442
	Os03g0266300|mRNA|AB110191|CDS+3'UTR	Os03g0266300	Class I low-molecular-weight heat shock protein 17.9.	3.08033	3.19945	3.33153	3.32856	2.98148
	Os03g0266300|mRNA|AF467729|CDS+3'UTR	Os03g0266300	Class I low-molecular-weight heat shock protein 17.9.	3.4818	3.68403	3.81669	3.92355	3.37267
	Os03g0266300|mRNA|AK073671|CDS+3'UTR	Os03g0266300	Class I low-molecular-weight heat shock protein 17.9.	3.29275	3.14014	3.30544	3.53367	3.02368
	Os03g0266300|mRNA|AK104129|CDS+3'UTR	Os03g0266300	Class I low-molecular-weight heat shock protein 17.9.	27.4801	42.9466	31.3118	32.2605	12.9588
	Os03g0266300|mRNA|AK119239|CDS+3'UTR	Os03g0266300	Class I low-molecular-weight heat shock protein 17.9.	3.62369	3.48598	3.44374	3.55483	3.27314
	Os03g0266300|mRNA|AK119616|CDS+3'UTR	Os03g0266300	Class I low-molecular-weight heat shock protein 17.9.	3.55947	3.19906	3.38883	3.43594	3.11677
	Os03g0266300|mRNA|AK119664|CDS+3'UTR	Os03g0266300	Class I low-molecular-weight heat shock protein 17.9.	3.10492	3.4494	3.29005	3.29008	3.08413
	Os03g0266300|mRNA|AK119675|CDS+3'UTR	Os03g0266300	Class I low-molecular-weight heat shock protein 17.9.	3.16696	3.25618	3.39886	3.45882	3.07094
	Os03g0266300|mRNA|D21285|5'UTR+CDS	Os03g0266300	Class I low-molecular-weight heat shock protein 17.9.	49.2379	53.7318	42.2099	19.5996	6.71862
	Os03g0266900|mRNA|AK119243|CDS+3'UTR	Os03g0266900	Low molecular mass heat shock protein Oshsp17.3.	25.8052	23.3736	18.4398	7.55988	3.79876
	Os03g0266900|mRNA|AK119717|CDS+3'UTR	Os03g0266900	Low molecular mass heat shock protein Oshsp17.3.	23.3393	22.1564	15.7776	7.33468	3.94157
	Os03g0266900|mRNA|D12635|CDS+3'UTR	Os03g0266900	Low molecular mass heat shock protein Oshsp17.3.	22.7005	21.8575	15.0723	7.02674	3.80258
	Os03g0266900|mRNA|M80186|CDS+3'UTR	Os03g0266900	Low molecular mass heat shock protein Oshsp17.3.	18.5505	18.7268	14.6964	6.93993	3.62839
	Os03g0267000|mRNA|X75616|CDS+3'UTR	Os03g0267000	Low molecular mass heat shock protein Oshsp18.0.	21.5983	22.2634	19.1553	7.72828	3.96036
	Os03g0267200|mRNA|AK069547|CDS+3'UTR	Os03g0267200	Low molecular mass heat shock protein Oshsp17.7.	8.519	8.35631	7.61776	3.16016	1.46687
	Os04g0445100|mRNA|AK063700|CDS+3'UTR	Os04g0445100	Similar to 22.7 kDa class IV heat shock protein precursor.	19.1413	21.0808	19.0484	16.404	6.96743
	Os06g0253100|mRNA|AK105317|CDS+3'UTR	Os06g0253100	Heat shock protein Hsp20 domain containing protein.	141.251	130.438	52.2123	21.8296	7.63936
	Os10g0437700|mRNA|AK062774|CDS+3'UTR	Os10g0437700	Heat shock protein Hsp20 domain containing protein.	0.997385	2.75299	3.22856	3.92791	4.48804
	Os11g0244200|mRNA|AK107883|CDS+3'UTR	Os11g0244200	Similar to Pisum sativum 17.9 kDa heat shock protein (hsp17.9) (Fragment).	110.211	95.9312	49.4944	10.4164	6.35994
unclassified	Os01g0239100|COMBINER_EST|CI258902|6	Os01g0239100	Heat shock protein DnaJ family protein.	4.60178	3.2042	2.67221	2.11676	1.77687
	Os01g0556400|COMBINER_EST|CI130408|6	Os01g0556400	Heat shock protein DnaJ family protein.	3.15362	3.58853	2.81028	2.55623	1.64854
	Os01g0606900|mRNA|AK065697|CDS+3'UTR	Os01g0606900	Heat shock protein DnaJ, N-terminal domain containing protein.	26.4309	11.373	19.0861	40.4295	24.8552
	Os01g0702500|mRNA|AK063691|CDS+3'UTR	Os01g0702500	Similar to Dehydrin Rab25.	13.9064	17.0283	15.939	5.77396	8.48168
	Os01g0702500|mRNA|AY333185|CDS+3'UTR	Os01g0702500	Similar to Dehydrin Rab25.	15.3458	20.5347	18.0901	9.22795	11.5651
	Os01g0702500|mRNA|X57327|CDS+3'UTR	Os01g0702500	Similar to Dehydrin Rab25.	14.0292	19.0341	17.0408	6.02709	9.38119
	Os01g0730500|mRNA|AK100064|CDS+3'UTR	Os01g0730500	Similar to Ferredoxin (Bacterial type ferredoxin family).	6.98972	3.78852	2.39589	1.66121	0.575867
	Os02g0306900|mRNA|AK070441|CDS+3'UTR	Os02g0306900	Similar to DnaJ-like protein.	1.22999	0.774043	0.51042	0.245503	0.206702
	Os02g0503500|COMBINER_EST|CI555084|3	Os02g0503500	Similar to 3-oxoacyl-[acyl-carrier-protein] reductase, chloroplast precursor (EC 1.1.1.100) (3-ketoacyl-acyl carrier protein reductase).	0.467275	0.102389	0.232988	0.275624	0.229363
	Os02g0644100|mRNA|AK102431|CDS+3'UTR	Os02g0644100	Similar to Heat shock protein STI (Stress inducible protein) (GmSTI).	3.82153	3.17431	2.34819	1.87042	1.38316
	Os02g0760000|COMBINER_EST|AU172669|7	Os02g0760000	Similar to chaperone protein dnaJ.	4.08087	5.27763	4.09372	3.67886	2.76132
	Os02g0782300|mRNA|AK067047|CDS+3'UTR	Os02g0782300	Similar to Heat shock-like protein.	4.28878	4.6987	4.2039	3.12793	2.96467
	Os02g0782300|mRNA|AK109297|UTR	Os02g0782300	Hypothetical conserved gene.	21.9252	36.5767	24.7936	10.0862	8.02779
	Os03g0245800|mRNA|AB020973|CDS+3'UTR	Os03g0245800	Similar to Heat shock protein 26.	18.9251	25.1403	22.2136	9.32372	4.6612
	Os03g0245800|mRNA|AK063618|CDS+3'UTR	Os03g0245800	Similar to Heat shock protein 26.	33.0543	32.0598	23.6737	10.1293	4.85895
	Os03g0245800|mRNA|AK120045|CDS+3'UTR	Os03g0245800	Similar to Heat shock protein 26.	23.0524	21.1011	20.8936	9.23226	4.51179
	Os03g0245800|mRNA|AK120048|CDS+3'UTR	Os03g0245800	Similar to Heat shock protein 26.	30.2556	27.9596	23.5453	9.93235	4.74319
	Os03g0293000|mRNA|AK063376|CDS+3'UTR	Os03g0293000	Thioredoxin fold domain containing protein.	18.6466	11.9627	5.1581	1.72117	0.984405
	Os03g0300600|mRNA|AK059801|CDS+3'UTR	Os03g0300600	Similar to Chaperone protein dnaJ.	4.14001	4.14945	5.63721	11.6812	10.5702
	Os03g0300600|mRNA|AK066250|CDS+3'UTR	Os03g0300600	Similar to Chaperone protein dnaJ.	4.17763	4.28462	5.90591	13.1445	11.5643
	Os03g0300600|mRNA|AK069897|CDS+3'UTR	Os03g0300600	Similar to Chaperone protein dnaJ.	3.67164	3.65391	5.2549	9.93683	8.94511
	Os03g0300600|mRNA|AK104186|CDS+3'UTR	Os03g0300600	Similar to Chaperone protein dnaJ.	4.24033	4.2418	6.19061	12.2904	11.2484
	Os03g0323600|mRNA|AK107871|UTR	Os03g0323600	Similar to DnaJ domain containing protein, expressed.	6.28102	4.11972	9.02243	2.82295	3.8261
	Os03g0776900|mRNA|AK107941|CDS+3'UTR	Os03g0776900	Similar to DNAJ protein-like.	34.5794	28.6095	17.3171	9.75869	6.96306
	Os04g0298700|COMBINER_EST|CI553559|2	Os04g0298700	Clp, N-terminal domain containing protein.	1.01799	1.03061	0.315804	0.324169	0.210274
	Os04g0538000|mRNA|AK108550|CDS+3'UTR	Os04g0538000	Tetratricopeptide-like helical domain containing protein.	41.7237	25.1092	12.0813	3.08169	1.70865
	Os05g0156500|mRNA|AK062718|CDS+3'UTR	Os05g0156500	Similar to Apobec-1 binding protein 2.	5.31776	6.99736	3.30138	1.5272	1.13038
	Os05g0296800|mRNA|AK108441|CDS+3'UTR	Os05g0296800	Hypothetical protein.	191.494	233.273	92.0339	19.1058	12.7279
	Os05g0296800|mRNA|AK108511|CDS+3'UTR	Os05g0296800	Hypothetical protein.	174.067	52.4885	24.555	4.65195	9.11689
	Os05g0529700|mRNA|AK062298|CDS+3'UTR	Os05g0529700	Similar to electron transporter/ heat shock protein binding protein.	9.18026	5.38593	2.68279	0.699103	0.60844
	Os05g0529700|mRNA|AK064168|CDS+3'UTR	Os05g0529700	Similar to electron transporter/ heat shock protein binding protein.	9.62907	5.64099	3.09724	1.13853	0.983353
	Os05g0533900|mRNA|AK106477|CDS+3'UTR	Os05g0533900	Similar to CLP protease regulatory subunit CLPX precursor.	3.49576	3.73472	3.40796	4.39778	3.5041
	Os05g0562300|mRNA|AK067414|CDS+3'UTR	Os05g0562300	Similar to DnaJ-like protein.	7.96945	5.71425	3.9409	2.00198	1.4151
	Os05g0587300|mRNA|AK120811|CDS+3'UTR	Os05g0587300	Molecular chaperone, heat shock protein, Hsp40, DnaJ domain containing protein.	0.612549	0.635996	0.453281	0.274421	0.301806
	Os06g0116800|mRNA|AK058985|CDS+3'UTR	Os06g0116800	Similar to GFA2.	6.22991	5.89889	3.49147	2.45251	1.75379
	Os06g0116800|mRNA|AK120746|CDS+3'UTR	Os06g0116800	Similar to GFA2.	6.7301	6.81575	3.66525	2.84753	1.99456
	Os06g0195800|mRNA|AK111076|CDS+3'UTR	Os06g0195800	Conserved hypothetical protein.	167.54	83.6739	56.2714	33.3623	13.9021
	Os06g0256300|mRNA|AK105344|CDS+3'UTR	Os06g0256300	Similar to Calmodulin-binding heat-shock protein.	4.45769	3.45047	2.05043	0.99769	1.11211
	Os06g0682900|mRNA|AK072958|CDS+3'UTR	Os06g0682900	Aldolase-type TIM barrel domain containing protein.	13.3536	12.4052	8.74861	3.47349	2.22306
	Os07g0443500|COMBINER_EST|Os07g0443500|8	Os07g0443500	Molecular chaperone, heat shock protein, Hsp40, DnaJ domain containing protein.	0.548513	0.223913	0.1008	0.102215	0.122435
	Os08g0452900|mRNA|AK069153|UTR	Os08g0452900	Similar to Chaperone protein dnaJ.	11.4785	10.0047	5.87547	2.79473	1.82938
	Os09g0482100|mRNA|D29710|CDS	Os09g0482100	Similar to Heat shock protein 82.	3.48888	3.5878	2.31156	2.20465	2.03032
	Os09g0482600|COMBINER_EST|CI255075|6	Os09g0482600	Similar to Heat shock protein 81-3.	3.32394	6.2486	7.33318	2.05576	5.60502
