# Supplementary material for: Expression Profile in Rice Panicle: Insights into Heat Response Mechanism at Reproductive Stage
Source: PLoS One. 2012 Nov 14;7(11):e49652. doi: 10.1371/journal.pone.0049652 (PMC3498232; doi:10.1371/journal.pone.0049652)
Supplement: Table S6 — The HR transporter genes. (XLS) [file pone.0049652.s006.xls]

## Sheet: transporter
Table S6 The HR transporter genes
ProbeName	RAP_ID	Annotation (Build 5)	ratio-20 min	ratio-60 min	ratio-2 h	ratio-4 h	ratio-8 h
Os05g0381400|mRNA|AK102039|CDS+3'UTR	Os05g0381400	Similar to ABA induced plasma membrane protein PM 19.	73.3871	157.725	110.551	25.2787	10.0147
Os04g0185600|COMBINER_EST|CI179631|6	Os04g0185600	General substrate transporter domain containing protein.	20.6985	30.657	14.7618	10.2557	3.57676
Os07g0425000|mRNA|AK108531|CDS+3'UTR	Os07g0425000	Biopterin transport-related protein BT1 family protein.	14.6126	4.25554	3.5278	1.42942	1.0567
Os01g0898900|mRNA|AK120093|CDS+3'UTR	Os01g0898900	Nucleotide-sugar transporter family protein.	11.5351	9.68811	4.59875	2.29917	1.62657
Os04g0470700|mRNA|AK071044|CDS+3'UTR	Os04g0470700	Amino acid transporter, transmembrane family protein.	9.91466	12.8904	5.9939	1.8015	2.01864
Os03g0328300|COMBINER|CI462386|0	Os03g0328300	Hypothetical conserved gene.	8.94771	4.72494	3.35685	1.13346	0.98927
Os04g0186400|mRNA|AK063990|CDS+3'UTR	Os04g0186400	Similar to Phosphate transporter 6.	8.89776	18.3735	5.31603	2.02872	0.354133
Os10g0579800|mRNA|AK066937|CDS+3'UTR	Os10g0579800	TGF-beta receptor, type I/II extracellular region family protein.	8.33688	8.54363	4.74118	3.04322	2.7461
Os06g0593100|mRNA|AK060274|CDS+3'UTR	Os06g0593100	Similar to UDP-galactose/UDP-glucose transporter.	8.15798	10.2284	3.48547	1.1425	0.69473
Os06g0593100|mRNA|AK071175|CDS+3'UTR	Os06g0593100	Similar to UDP-galactose/UDP-glucose transporter.	7.59479	8.74954	3.39884	1.0477	0.696988
Os02g0775100|mRNA|AK110750|CDS+3'UTR	Os02g0775100	Similar to Cation diffusion facilitator 8.	6.97617	11.6756	7.45929	8.39821	5.53984
Os06g0604500|mRNA|AK070190|CDS+3'UTR	Os06g0604500	EF-Hand type domain containing protein.	5.72132	4.94058	3.56606	4.02152	2.58295
Os07g0108800|mRNA|AK109604|CDS+3'UTR	Os07g0108800	Similar to Calcium-activated outward-rectifying potassium channel 1 (AtKCO1).	5.51104	3.4903	1.8139	1.03081	1.15986
Os01g0975900|mRNA|AK111747|CDS+3'UTR	Os01g0975900	Similar to Tonoplast membrane integral protein, OsTIP1;2.	4.72754	57.1338	29.1114	4.7476	6.15317
Os04g0186400|mRNA|AK101380|CDS+3'UTR	Os04g0186400	Similar to Phosphate transporter 6.	4.57091	8.01312	2.46994	0.599872	0.267558
Os03g0188100|COMBINER_EST|CI477332|6	Os03g0188100	Similar to transparent testa 12 protein.	4.46342	5.85145	3.65947	0.892911	1.05177
Os03g0332700|mRNA|AK072820|CDS+3'UTR	Os03g0332700	Similar to ABC Transporter, ATP binding component.	4.34903	3.63315	2.37871	2.47589	1.79382
Os02g0274900|mRNA|AK073967|CDS+3'UTR	Os02g0274900	Similar to metabolite transport protein csbC.	4.12074	3.46205	2.23426	1.06067	0.860783
Os02g0274900|mRNA|AK073268|CDS+3'UTR	Os02g0274900	Similar to metabolite transport protein csbC.	3.90341	3.31645	2.21382	1.04863	0.839101
Os07g0627800|mRNA|AK066361|CDS+3'UTR	Os07g0627800	Similar to DRG-like OBG family GTpase fused to an RNA binding domain TGS domain, Fun11p.	3.8697	3.07959	2.01059	1.20342	0.934444
Os04g0186400|mRNA|AF493789|CDS	Os04g0186400	Similar to Phosphate transporter 6.	3.69179	5.85028	2.21691	1.4527	0.997141
Os07g0448200|COMBINER_EST|Os07g0448200|8	Os07g0448200	Similar to cDNA clone:J023132K03, full insert sequence.	3.60063	1.23524	0.989469	0.311666	0.141283
Os09g0572400|mRNA|AK069041|CDS+3'UTR	Os09g0572400	Similar to Abcf2-prov protein.	3.48251	5.7611	4.10532	2.59193	2.39129
Os07g0448100|mRNA|AK072632|CDS+3'UTR	Os07g0448100	Similar to Plasma membrane integral protein, OsPIP2;4.	3.2938	1.3938	0.962518	0.417664	0.146995
Os11g0195600|mRNA|AK104370|CDS+3'UTR	Os11g0195600	Similar to Amino acid carrier (Fragment).	3.22672	2.45808	2.34948	4.19251	4.78708
Os03g0576900|mRNA|AK064598|CDS+3'UTR	Os03g0576900	Hypothetical conserved gene.	3.15111	3.3984	1.52909	1.25912	1.18244
Os07g0100800|mRNA|AK066298|CDS+3'UTR	Os07g0100800	Similar to Amino acid permease.	3.14137	9.64437	2.14199	0.92431	1.06249
Os03g0850700|mRNA|AK061542|CDS+3'UTR	Os03g0850700	Similar to Phosphatidylinositol phosphatidylcholine transfer protein sec14 cytosolic-like protein.	3.09294	2.45954	1.95549	0.456629	0.214675
Os02g0745100|mRNA|AK069842|CDS+3'UTR	Os02g0745100	Nodulin 26-like intrinsic membrane protein 2;1.;Low silicon rice 1.;Silicon influx transporter.;Arsenic species (As) uptake.;Arsenite efflux.;Aquaporin NIP III subfamily, OsNIP2;1 .	3.03763	6.47636	5.70761	3.348	2.07384
Os06g0127700|mRNA|AK072617|CDS+3'UTR	Os06g0127700	Similar to Oligopeptide transporter 7 (AtOPT7).	3.02553	3.71687	2.93725	2.74791	2.78932
Os07g0422100|mRNA|U57639|CDS+3'UTR	Os07g0422100	AWPM-19-like family protein.	3.00754	5.13954	22.6884	2.04629	2.39735
Os10g0360100|mRNA|AK106326|CDS+3'UTR	Os10g0360100	Similar to carbohydrate transporter/ sugar porter.	2.99335	3.80171	2.61915	3.93119	2.64709
Os07g0422100|mRNA|AK063592|CDS+3'UTR	Os07g0422100	AWPM-19-like family protein.	2.98675	4.91411	23.7201	2.23238	2.54206
Os01g0503400|mRNA|AK122122|CDS+3'UTR	Os01g0503400	Similar to (Rice Genome Annotation Project) metal transporter Nramp6.	2.71549	5.59971	3.64703	4.51491	3.91227
Os03g0332600|mRNA|AK058370|UTR	Os03g0332600	Non-protein coding transcript.	2.68176	3.92102	3.11805	2.4839	1.67786
Os03g0850700|mRNA|AK062083|CDS+3'UTR	Os03g0850700	Similar to Phosphatidylinositol phosphatidylcholine transfer protein sec14 cytosolic-like protein.	2.66752	1.87593	1.49763	0.3086	0.126229
Os01g0975900|mRNA|AB114829|CDS+3'UTR	Os01g0975900	Similar to Tonoplast membrane integral protein,OsTIP1;2.	2.50766	21.9805	12.0585	3.87884	5.878
Os01g0882800|mRNA|AK059325|CDS+3'UTR	Os01g0882800	Similar to Amino acid carrier (Fragment).	2.23601	1.11296	0.3534	0.223002	0.249196
Os08g0156600|mRNA|AK063143|CDS+3'UTR	Os08g0156600	Similar to glycerol 3-phosphate permease.	2.21604	3.64391	3.55217	1.27459	0.93891
Os01g0172100|mRNA|AK060343|CDS+3'UTR	Os01g0172100	Similar to Triose phosphate/phosphate translocator, non-green plastid, chloroplast precursor (CTPT).	2.13692	3.82541	4.42402	0.890414	0.894483
Os02g0475400|mRNA|AK121008|CDS+3'UTR	Os02g0475400	Bile acid:sodium symporter family protein.	2.10645	3.34756	3.0764	5.37439	3.2339
Os05g0468700|mRNA|AB051864|CDS+3'UTR	Os05g0468700	Ammonium transporter.	2.09032	3.55343	2.02742	1.79396	5.78883
Os08g0386800|mRNA|AK119576|CDS+3'UTR	Os08g0386800	Adenine nucleotide translocator 1 domain containing protein.	1.83906	2.71205	2.40051	3.45257	3.2704
Os08g0386800|mRNA|AK073889|CDS+3'UTR	Os08g0386800	Adenine nucleotide translocator 1 domain containing protein.	1.79043	2.59295	2.32818	3.59167	3.28473
Os06g0602700|COMBINER_EST|CI358981|1	Os06g0602700	Mitochondrial substrate/solute carrier domain containing protein.	1.65564	2.69238	2.53188	4.04606	3.92047
Os04g0643100|mRNA|AK106989|CDS+3'UTR	Os04g0643100	Similar to Vacuolar ATP synthase subunit D (EC 3.6.3.14) (V-ATPase D subunit) (Vacuolar proton pump D subunit).	1.63189	0.768712	0.381805	0.319716	0.247705
Os03g0823800|mRNA|AK071234|CDS+3'UTR	Os03g0823800	Similar to Permease 1.	1.4937	0.86172	0.391578	0.294976	0.318278
Os01g0175600|mRNA|AK072421|CDS+3'UTR	Os01g0175600	Bicarbonate transporter, eukaryotic domain containing protein.	1.44869	0.808798	0.35642	0.223667	0.227737
Os11g0637400|COMBINER_EST|Os11g0637400|8	Os11g0637400	Similar to Sugar transporter family protein, expressed.	1.44374	0.864379	0.948837	3.10911	6.40869
Os02g0802500|mRNA|AK102146|CDS+3'UTR	Os02g0802500	Similar to H(+)-translocating (Pyrophosphate-ENERGIZED) inorganic pyrophosphatase beta-1 polypeptide (EC 3.6.1.1) (Fragment).	1.4176	6.52736	26.6421	11.3442	14.8632
Os02g0802500|mRNA|AK064361|CDS+3'UTR	Os02g0802500	Similar to Proton translocating pyrophosphatase.	1.38869	6.37951	26.5755	11.0058	14.2375
Os03g0823800|mRNA|AK058223|CDS+3'UTR	Os03g0823800	Similar to permease I.	1.36543	0.844564	0.384278	0.285204	0.308797
Os10g0360100|mRNA|AK121279|CDS+3'UTR	Os10g0360100	Similar to Sugar transporter protein.	1.27096	1.08861	1.66623	3.88559	3.83966
Os01g0869200|mRNA|AK073453|CDS+3'UTR	Os01g0869200	Mg2+ transporter protein, CorA-like domain containing protein.	1.20336	1.53084	2.01953	4.07591	4.22469
Os04g0587400|mRNA|AK071680|CDS+3'UTR	Os04g0587400	Protein of unknown function DUF250 domain containing protein.	1.14017	2.40106	5.05148	5.87584	8.1508
Os12g0566000|mRNA|AK100510|5'UTR+CDS	Os12g0566000	Similar to Boron transporter.	1.12772	1.42243	0.932636	0.294901	0.203981
Os10g0345100|mRNA|AK069792|CDS+3'UTR	Os10g0345100	Multi antimicrobial extrusion protein MatE family protein.	1.11739	2.20466	13.6439	2.537	4.51093
Os06g0671800|COMBINER_EST|CI048449|6	Os06g0671800	Similar to patellin-5.	1.11333	0.330724	0.190867	0.0750674	0.278238
Os07g0561800|mRNA|AK108426|CDS+3'UTR	Os07g0561800	Conserved hypothetical protein.	1.09738	2.40909	36.7917	1.77212	4.87005
Os01g0878700|mRNA|AK119529|CDS+3'UTR	Os01g0878700	Amino acid transporter, transmembrane domain containing protein.	1.09414	1.8623	1.70143	0.317748	0.28261
Os04g0571600|COMBINER_EST|Os04g0571600|8	Os04g0571600	Multi antimicrobial extrusion protein MatE family protein.	1.04612	1.09807	1.90157	5.20254	6.82872
Os02g0593500|mRNA|AK104702|CDS+3'UTR	Os02g0593500	Similar to Phosphate transporter 2-1.	1.0268	1.61741	1.02228	0.156847	0.0819592
Os05g0382200|COMBINER_EST|Os05g0382200|8	Os05g0382200	Similar to Cation/H+ exchanger (Fragment).	1.01773	0.73777	0.727049	0.291368	0.306625
Os05g0241200|mRNA|AK059788|CDS+3'UTR	Os05g0241200	Similar to Phophate translocator (Fragment).	1.00953	0.619085	0.532097	0.275842	0.294481
Os01g0715500|COMBINER_EST|Os01g0715500|8	Os01g0715500	Similar to voltage-dependent anion channel protein 2.	0.997102	0.661108	0.574963	0.197141	0.147802
Os02g0175400|mRNA|AK067063|CDS+3'UTR	Os02g0175400	Similar to Vacuolar H(+)-ATPase subunit A (Fragment).	0.985111	0.613189	0.357793	0.282412	0.279218
Os03g0363600|mRNA|AK106658|CDS+3'UTR	Os03g0363600	Similar to Sugar transporter-like protein.	0.985021	0.62986	0.651032	5.81183	3.61597
Os01g0645200|mRNA|AK104932|CDS+3'UTR	Os01g0645200	Bile acid:sodium symporter domain containing protein.	0.96622	0.673774	0.539663	0.274351	0.221852
Os03g0638200|mRNA|AK069267|5'UTR+CDS	Os03g0638200	Similar to Major facilitator superfamily protein, expressed.	0.958691	3.04162	3.49432	0.881187	0.680315
Os03g0684400|mRNA|AK100086|CDS+3'UTR	Os03g0684400	Mg2+ transporter protein, CorA-like domain containing protein.	0.955399	1.03989	0.882017	0.239527	0.124094
Os05g0241200|mRNA|AK073395|CDS+3'UTR	Os05g0241200	Hypothetical conserved gene.	0.940908	0.602148	0.474961	0.315932	0.312713
Os01g0645200|mRNA|AK069337|CDS+3'UTR	Os01g0645200	Bile acid:sodium symporter domain containing protein.	0.93354	0.619393	0.50291	0.264382	0.212305
Os02g0593500|mRNA|AK067498|CDS+3'UTR	Os02g0593500	Phosphate transporter family protein.	0.928792	1.7083	0.662699	0.135819	0.0778507
Os12g0566000|mRNA|AK060451|CDS+3'UTR	Os12g0566000	Similar to Boron transporter.	0.902743	1.01327	0.814969	0.301704	0.285653
Os12g0566000|mRNA|AY339063|CDS	Os12g0566000	Similar to Boron transporter.	0.901693	1.07121	0.805982	0.252079	0.24449
Os03g0667300|COMBINER_EST|CI162465|6	Os03g0667300	Similar to Metal transport protein.	0.837354	1.69264	2.09526	3.86898	3.77426
Os04g0209300|mRNA|AK120122|CDS+3'UTR	Os04g0209300	Similar to Glutathione-conjugate transporter AtMRP4.	0.809041	0.395792	0.294112	0.316663	0.390118
Os05g0231700|mRNA|AK072531|CDS+3'UTR	Os05g0231700	Similar to Tonoplast membrane integral protein, OsTIP4;1.	0.798538	1.07256	1.1631	6.80918	7.60604
Os05g0231700|mRNA|AK060193|CDS+3'UTR	Os05g0231700	Similar to Tonoplast membrane integral protein, OsTIP4;1.	0.793344	0.986681	1.39032	3.08486	3.35974
Os01g0279400|mRNA|AK065048|CDS+3'UTR	Os01g0279400	Major facilitator superfamily antiporter.	0.784654	0.211227	0.30527	0.274708	0.323387
Os01g0279400|mRNA|AF543418|CDS+3'UTR	Os01g0279400	Major facilitator superfamily antiporter.	0.779957	0.231151	0.321466	0.302097	0.340395
Os12g0132800|mRNA|AF543419|CDS+3'UTR	Os12g0132800	Major facilitator superfamily antiporter.	0.745788	0.734818	3.99474	4.49957	5.92895
Os02g0574500|mRNA|AK103980|CDS+3'UTR	Os02g0574500	Conserved hypothetical protein.	0.730568	0.784094	0.836633	0.128217	0.0467285
Os02g0574500|mRNA|AK065365|CDS+3'UTR	Os02g0574500	Conserved hypothetical protein.	0.730503	0.817212	0.88494	0.131876	0.0400725
Os02g0574500|mRNA|AK059863|CDS+3'UTR	Os02g0574500	Hypothetical conserved gene.	0.72744	0.818069	0.897849	0.134249	0.0421
Os01g0872500|mRNA|AK066692|CDS+3'UTR	Os01g0872500	Similar to peptide transporter PTR2-B.	0.71589	1.12931	1.48453	3.68872	3.11247
Os08g0130000|COMBINER_EST|Os08g0130000|8	Os08g0130000	Putative DNA binding domain containing protein.	0.686059	0.427568	0.247011	0.14988	0.277654
Os02g0245800|mRNA|AK100808|5'UTR+CDS	Os02g0245800	Similar to Inward rectifying shaker K+ channel.	0.667034	0.924163	0.880712	0.235038	0.233308
Os03g0571700|mRNA|AK107345|CDS+3'UTR	Os03g0571700	Similar to TRANSPARENT TESTA 12 protein.	0.662915	0.154156	0.253445	0.343472	0.439105
Os01g0878700|mRNA|AK065286|CDS+3'UTR	Os01g0878700	Amino acid transporter, transmembrane domain containing protein.	0.658757	1.79019	1.62684	0.185895	0.255969
Os03g0751100|mRNA|AK102404|CDS+3'UTR	Os03g0751100	Similar to Isp4 protein-like.	0.653938	0.44009	0.288284	0.281888	0.282923
Os05g0219900|mRNA|AK120886|CDS+3'UTR	Os05g0219900	C4-dicarboxylate transporter/malic acid transport protein family protein.	0.645008	0.702849	0.502925	0.273747	0.242397
Os02g0693700|mRNA|AK106518|CDS+3'UTR	Os02g0693700	Hypothetical conserved gene.	0.595085	0.476061	0.331471	0.218839	0.439894
Os05g0424000|mRNA|AK065891|CDS+3'UTR	Os05g0424000	Similar to Amino acid carrier (Fragment).	0.593789	0.274507	0.198227	0.36165	0.514117
Os08g0520000|mRNA|AK063556|CDS+3'UTR	Os08g0520000	Mitochondrial substrate carrier family protein.	0.584527	0.438185	0.299268	0.267787	0.400072
Os06g0125400|COMBINER_EST|CI405841|0	Os06g0125400	Similar to Oligopeptide transporter 9.	0.580177	0.779907	0.456451	0.279257	0.263812
Os01g0978000|mRNA|AK102326|CDS+3'UTR	Os01g0978000	Similar to Uncoupling protein.	0.578093	0.406559	0.260197	0.274029	0.317522
Os06g0275800|mRNA|AK066102|CDS+3'UTR	Os06g0275800	Amino acid transporter, transmembrane domain containing protein.	0.562985	1.15896	1.10683	0.268544	0.244715
Os03g0751100|mRNA|AY224494|5'UTR+CDS	Os03g0751100	Similar to Isp4 protein-like.	0.551106	0.385326	0.300808	0.254623	0.359595
Os01g0232000|COMBINER_EST|CI471600|1	Os01g0232000	Major intrinsic protein family protein.	0.548239	0.273012	0.192794	0.165358	0.122069
Os01g0978000|mRNA|AK103874|CDS+3'UTR	Os01g0978000	Similar to Uncoupling protein.	0.544528	0.372081	0.260904	0.262119	0.285037
Os05g0481900|mRNA|AK119626|CDS+3'UTR	Os05g0481900	Auxin efflux carrier domain containing protein.	0.544314	0.51403	0.314151	0.158753	0.235105
Os09g0481100|mRNA|AK063554|CDS+3'UTR	Os09g0481100	Similar to Phosphatidylinositol transfer-like protein IV.	0.53458	0.403669	0.360183	0.281649	0.318352
Os05g0481900|mRNA|AK106744|CDS+3'UTR	Os05g0481900	Auxin efflux carrier domain containing protein.	0.531041	0.451056	0.291451	0.14129	0.215636
Os04g0460300|mRNA|AK106202|CDS+3'UTR	Os04g0460300	Amino acid transporter, transmembrane domain containing protein.	0.502533	0.30249	0.417102	0.247381	0.245323
Os01g0856500|mRNA|AK103981|CDS+3'UTR	Os01g0856500	Similar to auxin transporter-like protein 1.	0.476661	0.469984	0.408115	0.274986	0.329684
Os03g0758300|mRNA|AK060339|CDS+3'UTR	Os03g0758300	Similar to Cyclic nucleotide-gated ion channel 2 (Fragment).	0.437178	0.214112	0.313908	0.369682	0.537637
Os03g0118200|mRNA|AK060919|CDS+3'UTR	Os03g0118200	UAA transporter family protein.	0.43617	0.507501	1.6489	3.25668	5.79799
Os03g0375300|mRNA|AK072316|CDS+3'UTR	Os03g0375300	Amino acid/polyamine transporter I family protein.	0.416807	0.0971099	0.048106	0.021614	0.0286917
Os01g0680200|mRNA|AK121881|CDS+3'UTR	Os01g0680200	Protein of unknown function DUF250 domain containing protein.	0.412228	0.504285	4.52886	3.05338	2.21378
Os03g0375300|mRNA|AK070119|CDS+3'UTR	Os03g0375300	Amino acid/polyamine transporter I family protein.	0.401502	0.121158	0.0542345	0.0330492	0.0218668
Os06g0228600|mRNA|AK106762|CDS+3'UTR	Os06g0228600	Similar to Amino acid carrier.	0.381545	0.204219	2.01035	3.14273	3.28159
Os03g0758300|mRNA|AK067626|CDS+3'UTR	Os03g0758300	Similar to Cyclic nucleotide-gated ion channel 2 (AtCNGC2) (Cyclic nucleotide-and calmodulin-regulated ion channel 2) (DEFENSE NO DEATH 1).	0.379793	0.20382	0.288421	0.401593	0.535853
Os04g0453200|mRNA|AK062721|UTR	Os04g0453200	Similar to H0505F09.4 protein.	0.375401	0.127779	0.142779	0.265301	0.366097
Os02g0576600|mRNA|AK073105|CDS+3'UTR	Os02g0576600	Sucrose transporter.	0.355401	0.269667	0.269255	0.220523	0.176247
Os05g0332600|mRNA|AK098926|CDS+3'UTR	Os05g0332600	Similar to predicted protein.	0.348006	0.411501	0.996343	3.42044	3.56216
Os02g0576600|mRNA|AB091674|CDS+3'UTR	Os02g0576600	Sucrose transporter.	0.327341	0.269433	0.296321	0.219665	0.196031
Os06g0228200|mRNA|AK072966|CDS+3'UTR	Os06g0228200	Similar to NOD26-like membrane integral protein ZmNIP2-2.	0.32547	0.368544	0.525031	0.313642	0.463507
Os12g0194900|mRNA|AK069508|CDS+3'UTR	Os12g0194900	Similar to Amino acid carrier (Fragment).	0.324766	0.69099	0.517337	0.183264	0.255477
Os10g0469900|mRNA|AK059075|CDS+3'UTR	Os10g0469900	TGF-beta receptor, type I/II extracellular region family protein.	0.321768	0.27069	0.703561	1.5427	1.39741
Os02g0731500|COMBINER_EST|CI422411|0	Os02g0731500	Similar to cDNA, clone: J065098J18, full insert sequence.	0.321302	0.698528	1.76711	1.94388	3.66532
Os06g0671000|mRNA|AK111663|CDS+3'UTR	Os06g0671000	Similar to Potassium transporter 1 (AtPOT1) (AtKUP1) (AtKT1).	0.309057	0.320307	0.922867	1.01698	1.54321
Os05g0472700|mRNA|AB126087|CDS	Os05g0472700	Similar to Metal transport protein.	0.292814	0.230984	0.56857	0.590372	0.663539
Os01g0307500|mRNA|AK108663|CDS+3'UTR	Os01g0307500	Cation transporter family protein.	0.280922	0.132218	0.232113	0.799996	1.45399
Os06g0228500|mRNA|AK107472|CDS+3'UTR	Os06g0228500	Amino acid transporter, transmembrane domain containing protein.	0.279112	0.157837	0.24686	5.39363	3.13567
Os09g0467400|mRNA|AK061667|CDS+3'UTR	Os09g0467400	Similar to ATPUP3.	0.277215	0.260518	0.612148	0.578933	0.632557
Os11g0139400|mRNA|AK107562|CDS+3'UTR	Os11g0139400	Protein of unknown function DUF250 domain containing protein.	0.274625	0.210834	0.374243	0.440816	0.692236
Os03g0281900|mRNA|AK072135|CDS+3'UTR	Os03g0281900	ABC transporter-like domain containing protein.	0.267668	0.273816	1.60357	4.52029	8.46661
Os06g0607700|mRNA|AK106792|CDS+3'UTR	Os06g0607700	ABC transporter-like domain containing protein.	0.26106	0.121754	1.36733	2.04423	4.84791
Os10g0469900|mRNA|AK105737|CDS+3'UTR	Os10g0469900	TGF-beta receptor, type I/II extracellular region family protein.	0.260045	0.245807	0.389424	1.26271	1.04982
Os09g0467400|mRNA|AK066610|CDS+3'UTR	Os09g0467400	Protein of unknown function DUF6, transmembrane domain containing protein.	0.257884	0.148648	0.412157	0.489982	0.491178
Os08g0466200|mRNA|AK119564|CDS+3'UTR	Os08g0466200	Similar to KUP-related potassium transporter.	0.235174	0.155055	0.256188	0.326226	0.705206
Os10g0469900|mRNA|AK101007|CDS+3'UTR	Os10g0469900	Similar to peptide transporter PTR2.	0.233836	0.255049	0.382899	1.52777	1.44278
Os03g0218400|mRNA|AK099306|CDS+3'UTR	Os03g0218400	Similar to Hexose transporter.	0.211081	0.300776	0.450454	1.10219	0.629858
Os12g0136100|COMBINER_EST|CI144901|6	Os12g0136100	Similar to Plastidic phosphate translocator-like protein1.	0.207071	0.191955	0.383634	0.418111	0.675122
Os01g0770700|COMBINER_EST|Os01g0770700|8	Os01g0770700	Similar to Copper transporter 1.	0.205697	0.152489	0.27943	0.214684	0.48288
Os01g0908600|COMBINER_EST|CI394003|0	Os01g0908600	Amino acid transporter, transmembrane domain containing protein.	0.205359	0.211188	0.460139	0.647036	1.38652
Os12g0231000|mRNA|AK120737|CDS+3'UTR	Os12g0231000	TGF-beta receptor, type I/II extracellular region family protein.	0.190548	0.202037	0.911808	0.81226	0.690831
Os08g0466200|mRNA|AF129485|CDS+3'UTR	Os08g0466200	Similar to KUP-related potassium transporter.	0.189117	0.105731	0.245254	0.281398	0.695823
Os07g0134000|mRNA|AK058572|CDS+3'UTR	Os07g0134000	Similar to Amino acid permease 6.	0.188405	0.290828	0.65128	4.6913	2.41838
Os05g0472700|mRNA|AK070864|CDS+3'UTR	Os05g0472700	Similar to Metal transport protein.	0.183211	0.233626	0.563688	0.72276	0.872808
Os09g0484900|mRNA|AK105756|CDS+3'UTR	Os09g0484900	Sodium/sulphate symporter family protein.	0.179668	0.318336	0.910498	0.80096	1.20879
Os05g0472700|mRNA|AY281300|CDS+3'UTR	Os05g0472700	Similar to Metal transport protein.	0.179046	0.226994	0.563821	0.609695	0.703322
Os08g0466200|mRNA|AK071698|CDS+3'UTR	Os08g0466200	Similar to KUP-related potassium transporter.	0.16254	0.0965433	0.228937	0.267967	0.662318
Os06g0560000|mRNA|AK063490|CDS+3'UTR	Os06g0560000	Ferroportin1 family protein.	0.162094	0.266283	0.446371	0.567806	0.652956
Os03g0138700|mRNA|AK072119|CDS+3'UTR	Os03g0138700	TGF-beta receptor, type I/II extracellular region family protein.	0.161197	0.241502	0.520815	0.733006	0.962641
Os06g0560000|mRNA|AK101863|CDS+3'UTR	Os06g0560000	Ferroportin1 family protein.	0.158751	0.266604	0.431905	0.547731	0.582304
Os07g0102100|mRNA|AK099800|CDS+3'UTR	Os07g0102100	Similar to Potassium transporter 1 (OsHAK1). Splice isoform 2.	0.143474	0.296349	1.03884	1.41202	2.37456
Os09g0484900|mRNA|AK067836|CDS+3'UTR	Os09g0484900	Sodium/sulphate symporter family protein.	0.143085	0.285492	0.695845	0.758311	1.19134
Os07g0102100|mRNA|AK066544|CDS+3'UTR	Os07g0102100	Similar to Potassium transporter 22.	0.142535	0.263954	0.890549	1.38728	2.36638
Os01g0112400|mRNA|AK106825|CDS+3'UTR	Os01g0112400	Major intrinsic protein family protein, OsNIP4;1.	0.130326	0.0751019	1.91666	3.0284	5.29183
Os07g0257200|mRNA|AK070788|CDS+3'UTR	Os07g0257200	Similar to OsNramp1 (Integral membrane protein).	0.119133	0.236309	0.112712	0.0223504	0.061277
Os07g0134000|mRNA|AK106110|CDS+3'UTR	Os07g0134000	Similar to Amino acid permease-like protein (Fragment).	0.033692	0.0554178	0.165688	1.64318	0.803747
