# Supplementary material for: Expression Profile in Rice Panicle: Insights into Heat Response Mechanism at Reproductive Stage
Source: PLoS One. 2012 Nov 14;7(11):e49652. doi: 10.1371/journal.pone.0049652 (PMC3498232; doi:10.1371/journal.pone.0049652)
Supplement: Table S7 — The HR ROS-related genes. (XLSX) [file pone.0049652.s007.xlsx]

## Sheet: 去重复探针
ProbeName	annotation (Build 5)	locus	ratio-20min	ratio-60min	ratio-2h	ratio-4h	ratio-8h
Os04g0581100|mRNA|AK100853|CDS+3'UTR	2OG-Fe(II) oxygenase domain containing protein.	Os04g0581100	0.678072	1.94147	0.299011	0.753414	0.239915
Os10g0558200|COMBINER_EST|Os10g0558200|8	2OG-Fe(II) oxygenase domain containing protein.	Os10g0558200	0.49445	0.281022	0.212043	0.114351	0.0976966
Os04g0576800|mRNA|AK073542|CDS+3'UTR	3-oxo-5-alpha-steroid 4-dehydrogenase, C-terminal domain containing protein.	Os04g0576800	3.09461	3.61487	2.06677	1.5541	0.978095
Os04g0540600|mRNA|AF464932|CDS+3'UTR	Aldehyde dehydrogenase domain containing protein.	Os04g0540600	0.434879	0.285477	0.325559	0.345212	0.358056
Os01g0756900|mRNA|AK058427|CDS+3'UTR	Aldehyde dehydrogenase, conserved site domain containing protein.	Os01g0756900	0.978706	0.207749	0.251485	0.0938914	0.295972
Os04g0337500|mRNA|AK068652|CDS+3'UTR	Aldo/keto reductase family protein.	Os04g0337500	0.139315	0.101976	0.53457	0.315292	0.828125
Os10g0375700|mRNA|AK068318|CDS+3'UTR	Alpha/beta hydrolase fold-1 domain containing protein.	Os10g0375700	0.803868	1.15048	1.56638	3.22902	3.39662
Os04g0600200|mRNA|AB004864|CDS+3'UTR	Alternative oxidase 1a.	Os04g0600200	1.17301	2.88633	3.50728	3.29135	4.49841
Os04g0600300|mRNA|AB004865|CDS+3'UTR	Alternative oxidase 1b.	Os04g0600300	311.587	528.527	83.414	22.272	26.189
Os12g0626100|mRNA|AK059924|CDS+3'UTR	Armadillo-like helical domain containing protein.	Os12g0626100	1.13242	1.2889	1.46302	3.4043	4.84344
Os05g0370600|mRNA|AK102476|CDS+3'UTR	C2 calcium-dependent membrane targeting domain containing protein.	Os05g0370600	15.069	6.68885	2.85444	1.34298	1.04685
Os01g0126200|mRNA|AK121464|CDS+3'UTR	Conserved hypothetical protein.	Os01g0126200	0.653256	0.575493	0.475361	0.26681	0.256865
Os03g0114100|mRNA|AK108265|CDS+3'UTR	Conserved hypothetical protein.	Os03g0114100	4.40076	3.5728	5.3179	1.53544	1.21472
Os03g0140400|COMBINER_EST|Os03g0140400|8	Conserved hypothetical protein.	Os03g0140400	0.153049	0.219915	0.396982	0.318385	0.523607
Os04g0469700|mRNA|AK068788|CDS+3'UTR	Conserved hypothetical protein.	Os04g0469700	0.529272	1.4858	2.2416	3.32376	3.79556
Os08g0494200|mRNA|AK100830|CDS+3'UTR	Conserved hypothetical protein.	Os08g0494200	1.68373	1.32966	1.37283	3.17636	4.29851
Os11g0673100|mRNA|AK068515|CDS+3'UTR	Conserved hypothetical protein.	Os11g0673100	3.31663	3.76236	2.83538	2.80768	1.87349
Os06g0338200|mRNA|AK067262|CDS+3'UTR	Copper amine oxidase family protein.	Os06g0338200	0.325564	0.19674	0.484339	0.369837	0.71523
Os02g0642300|mRNA|AK062638|CDS+3'UTR	Cytochrome b561 family protein.	Os02g0642300	6.73554	8.6985	6.43457	4.5781	3.90755
Os04g0533500|mRNA|AK061426|CDS+3'UTR	Cytochrome b561 family protein.	Os04g0533500	0.765434	0.712827	0.353924	0.16036	0.200186
Os04g0469800|mRNA|AB158759|CDS+3'UTR	Cytochrome P450 724B1 (EC 1.14.-.-) (OsDWARF11) (Dwarf protein 11).	Os04g0469800	0.269026	0.29943	0.366995	0.33635	0.324086
Os02g0184700|COMBINER_EST|CI223126|6	Cytochrome P450 family protein.	Os02g0184700	0.48096	0.288219	0.46693	0.291562	0.257604
Os02g0503900|mRNA|AK100163|CDS+3'UTR	Cytochrome P450 family protein.	Os02g0503900	0.197706	0.180398	0.686756	0.480579	0.954502
Os02g0596300|mRNA|AK109775|CDS+3'UTR	Cytochrome P450 family protein.	Os02g0596300	0.215781	0.295567	1.541	1.08502	1.94788
Os03g0138200|mRNA|AK105857|CDS+3'UTR	Cytochrome P450 family protein.	Os03g0138200	0.0856049	0.108897	0.416911	0.502368	0.891343
Os03g0594900|mRNA|AK069017|CDS+3'UTR	Cytochrome P450 family protein.	Os03g0594900	13.8523	16.5422	10.9093	4.50349	1.48861
Os03g0760200|mRNA|AK066760|CDS+3'UTR	Cytochrome P450 family protein.	Os03g0760200	1.15295	1.93135	3.01818	2.23431	3.1018
Os04g0570600|mRNA|AK106747|CDS+3'UTR	Cytochrome P450 family protein.	Os04g0570600	0.137714	0.129226	1.83599	1.61168	4.99813
Os05g0482400|mRNA|AK109526|CDS+3'UTR	Cytochrome P450 family protein.	Os05g0482400	0.246069	0.388748	0.318932	0.487334	0.479638
Os06g0294600|mRNA|AK059089|CDS+3'UTR	Cytochrome P450 family protein.	Os06g0294600	0.369924	0.831814	2.13136	3.79385	4.61225
Os10g0515900|mRNA|AK106424|CDS+3'UTR	Cytochrome P450 family protein.	Os10g0515900	0.240184	0.165848	0.0386295	0.436024	0.031888
Os11g0289700|mRNA|AK060292|CDS+3'UTR	Cytochrome P450 family protein.	Os11g0289700	0.109143	0.176003	0.761183	1.12817	3.03696
Os12g0119000|mRNA|AK066943|CDS+3'UTR	Cytochrome P450 family protein.	Os12g0119000	2.48213	3.36697	3.08475	2.04713	2.19854
Os01g0628700|COMBINER_EST|CI002312|0	Cytochrome P450.	Os01g0628700	1.7573	3.1609	2.97205	3.61011	3.20606
Os02g0124600|COMBINER_EST|C99380|6	D-arabinono-1,4-lactone oxidase domain containing protein.	Os02g0124600	0.446759	0.221247	0.590647	0.301084	0.636005
Os03g0563100|mRNA|AK109527|CDS+3'UTR	D-arabinono-1,4-lactone oxidase domain containing protein.	Os03g0563100	0.240267	0.231273	0.308638	0.239147	0.316664
Os11g0533100|COMBINER_EST|CI386659|6	DEAD-like helicase, N-terminal domain containing protein.	Os11g0533100	0.45408	0.945548	1.88834	6.20167	4.31289
Os04g0223500|mRNA|AK071801|CDS+3'UTR	Dimethylaniline monooxygenase, N-oxide-forming domain containing protein.	Os04g0223500	0.38778	0.180235	0.436085	4.52395	3.80896
Os04g0227500|mRNA|AK059943|CDS+3'UTR	DSBA oxidoreductase family protein.	Os04g0227500	0.138622	0.294041	1.2178	0.978371	1.20553
Os07g0155100|mRNA|AK105193|CDS+3'UTR	FAD dependent oxidoreductase family protein.	Os07g0155100	1.34182	2.00868	2.4769	4.59712	3.34997
Os09g0514100|mRNA|AK103415|CDS+3'UTR	FAD dependent oxidoreductase family protein.	Os09g0514100	4.99619	8.38344	4.14109	3.17308	1.68488
Os04g0444800|mRNA|AB126084|CDS+3'UTR	Ferric reductase-like transmembrane component family protein.	Os04g0444800	0.581414	0.952622	0.843818	0.179285	0.063657
Os07g0111700|mRNA|AK072540|CDS+3'UTR	Flavin-containing monooxygenase FMO family protein.	Os07g0111700	0.153917	0.163662	0.387279	0.809149	0.857683
Os09g0549300|COMBINER_EST|Os09g0549300|8	Flavin-containing monooxygenase FMO family protein.	Os09g0549300	1.84002	0.983932	8.52264	7.37908	8.59345
Os07g0663700|mRNA|AK070585|CDS+3'UTR	Glucose/ribitol dehydrogenase family protein.	Os07g0663700	0.421576	0.179717	0.167461	0.19018	0.169113
Os08g0476300|mRNA|AK071937|CDS+3'UTR	Glucose/ribitol dehydrogenase family protein.	Os08g0476300	1.56561	2.74415	4.18563	2.66852	4.57036
Os03g0368900|mRNA|AK099751|CDS+3'UTR	Haem peroxidase family protein.	Os03g0368900	0.292698	0.18094	0.589627	1.0022	1.95389
Os05g0135500|mRNA|AK060998|CDS+3'UTR	Haem peroxidase family protein.	Os05g0135500	0.161617	0.10661	0.471442	1.24423	3.00118
Os06g0472900|mRNA|AK072945|CDS+3'UTR	Haem peroxidase family protein.	Os06g0472900	0.21411	0.311275	0.731389	0.255894	0.312964
Os04g0628200|mRNA|AK068148|CDS+3'UTR	Haem peroxidase, plant/fungal/bacterial family protein.	Os04g0628200	1.21272	1.1727	1.18958	3.94482	5.0833
Os06g0695300|COMBINER_EST|CI548521|1	Haem peroxidase, plant/fungal/bacterial family protein.	Os06g0695300	0.168494	0.393113	0.371814	0.28238	0.499277
Os07g0136800|mRNA|AK073763|CDS+3'UTR	Homeodomain-like containing protein.	Os07g0136800	7.23441	4.46586	1.55686	2.36239	2.87334
Os05g0231900|COMBINER_EST|CI501135|6	Hypothetical conserved gene.	Os05g0231900	0.105642	0.149132	1.40439	3.22642	4.263
Os09g0380300|COMBINER_EST|CI550577|6	Hypothetical conserved gene.	Os09g0380300	0.252406	0.201352	0.407723	0.363262	0.516693
Os11g0119700|COMBINER_EST|CI245112|6	Hypothetical conserved gene.	Os11g0119700	2.57587	3.73854	3.1638	2.37405	2.28818
Os03g0712600|mRNA|AK103705|CDS+3'UTR	Hypothetical protein.	Os03g0712600	0.41993	2.76969	3.82963	5.10855	3.84054
Os01g0536400|COMBINER_EST|CI557769|0	Isopenicillin N synthase family protein.	Os01g0536400	7.42223	5.53596	2.82324	1.03383	0.958794
Os09g0570800|mRNA|AK064211|CDS+3'UTR	Isopenicillin N synthase family protein.	Os09g0570800	2.71274	5.39947	4.71761	3.55706	3.77347
Os07g0694700|mRNA|AK068430|CDS+3'UTR	L-ascorbate peroxidase.	Os07g0694700	3.22661	0.894411	0.428262	0.293997	0.283897
Os12g0559200|mRNA|AJ270938|CDS+3'UTR	Lipoxygenase (EC 1.13.11.12).	Os12g0559200	0.279573	0.266943	0.398684	0.841186	0.476203
Os02g0730000|mRNA|AB030939|CDS+3'UTR	Mitochondrial aldehyde dehydrogenase ALDH2a.	Os02g0730000	0.903388	1.85222	3.70347	4.39707	4.69079
Os03g0245100|mRNA|AK069529|CDS+3'UTR	NAD(P)-binding domain containing protein.	Os03g0245100	1.48887	11.5416	12.6241	20.6802	9.14752
Os06g0704700|mRNA|AY224493|CDS	NAD(P)-binding domain containing protein.	Os06g0704700	1.06779	1.60132	1.14356	0.286385	0.19654
Os07g0621600|COMBINER_EST|CI426042|0	Non-protein coding transcript.	Os07g0621600	6.05409	13.5564	8.27325	3.60415	2.07488
Os08g0131000|mRNA|AK101091|CDS+3'UTR	Pentatricopeptide repeat domain containing protein.	Os08g0131000	0.84925	0.305857	0.396404	0.296195	0.340874
Os11g0112400|COMBINER_EST|CI529944|0	Peroxidase (EC 1.11.1.7).	Os11g0112400	0.208311	0.284584	1.11272	1.40653	1.89901
Os04g0602100|mRNA|AK069838|CDS+3'UTR	Plant ascorbate peroxidase domain containing protein.	Os04g0602100	0.509194	0.436061	0.362153	0.139659	0.104902
Os10g0550900|mRNA|AK121010|CDS+3'UTR	Proline oxidase domain containing protein.	Os10g0550900	4.34693	3.6543	1.74747	0.35753	0.322347
Os03g0245200|mRNA|AK062288|CDS+3'UTR	Protein of unknown function DUF1210 family protein.	Os03g0245200	0.725911	0.55414	0.452115	0.127764	0.192939
Os07g0556200|mRNA|AK071634|CDS+3'UTR	Rieske [2Fe-2S] region domain containing protein.	Os07g0556200	1.30038	1.17586	0.481211	0.296277	0.0732635
Os07g0663800|mRNA|AK061856|CDS+3'UTR	Short-chain dehydrogenase/reductase SDR domain containing protein.	Os07g0663800	0.286669	0.982411	3.72314	2.07141	3.1972
Os07g0664400|COMBINER_EST|CI014022|0	Short-chain dehydrogenase/reductase SDR domain containing protein.	Os07g0664400	1.3135	1.15606	1.22425	6.61824	15.0651
Os07g0638300|mRNA|AK101401|CDS+3'UTR	Similar to 1-Cys peroxiredoxin.	Os07g0638300	85.931	212.489	99.2215	15.5306	3.69465
Os02g0503500|COMBINER_EST|CI555084|3	Similar to 3-oxoacyl-[acyl-carrier-protein] reductase, chloroplast precursor (EC 1.1.1.100) (3-ketoacyl-acyl carrier protein reductase).	Os02g0503500	0.467275	0.102389	0.232988	0.275624	0.229363
Os01g0878900|mRNA|AK060927|CDS+3'UTR	Similar to 4,5-DOPA dioxygenase extradiol-like protein.	Os01g0878900	0.273355	0.257271	0.555454	0.741663	0.746665
Os01g0880800|mRNA|AK059526|CDS+3'UTR	Similar to Acyl-[acyl-carrier-protein] desaturase, chloroplast precursor (EC 1.14.19.2) (Stearoyl-ACP desaturase).	Os01g0880800	13.542	11.5054	22.1459	1.9778	0.628558
Os01g0159400|mRNA|AK100550|CDS+3'UTR	Similar to Acyl-coenzyme A oxidase 4, peroxisomal (EC 1.3.3.6) (AOX 4) (Short- chain acyl-CoA oxidase) (SAOX) (AtCX4) (G6p) (AtG6).	Os01g0159400	4.36406	4.35658	3.31569	2.30607	1.25315
Os06g0347100|mRNA|AK063762|CDS+3'UTR	Similar to Acyl-coenzyme A oxidase 4, peroxisomal (EC 1.3.3.6) (AOX 4) (Short- chain acyl-CoA oxidase) (SAOX) (AtCX4) (G6p) (AtG6).	Os06g0347100	0.853215	1.19707	1.85571	3.44947	4.01953
Os07g0509800|COMBINER_EST|AU100738|6	Similar to adenosine 5'-phosphosulfate reductase 2.	Os07g0509800	3.87978	8.60023	2.90255	0.204084	0.201282
Os03g0189400|mRNA|AK067720|CDS+3'UTR	Similar to Alcohol dehydrogenase ADH.	Os03g0189400	0.859394	0.329274	0.213869	0.141378	0.181903
Os05g0474600|mRNA|AK066733|CDS+3'UTR	Similar to Aldose reductase-related protein (EC 1.1.1.21).	Os05g0474600	1.90326	5.77322	4.07871	2.6859	2.61839
Os12g0226900|mRNA|AK071631|CDS+3'UTR	Similar to Allyl alcohol dehydrogenase.	Os12g0226900	0.149369	0.804626	1.49179	0.38646	0.218048
Os06g0567900|mRNA|AB004799|5'UTR+CDS	Similar to Ascorbate oxidase (Fragment).	Os06g0567900	4.33755	3.80068	3.62813	0.674605	0.865144
Os04g0578400|mRNA|AK060559|CDS+3'UTR	Similar to Beta-ring hydroxylase (Fragment).	Os04g0578400	1.01419	0.970576	1.05805	0.30666	0.154165
Os10g0533500|COMBINER_EST|Os10g0533500|8	Similar to Beta-ring hydroxylase (Fragment).	Os10g0533500	0.980776	0.491949	0.526491	0.161146	0.0993787
Os12g0446900|COMBINER_EST|Os12g0446900|8	Similar to bifunctional dihydrofolate reductase-thymidylate synthase.	Os12g0446900	1.51498	0.272289	0.180545	0.257126	0.216898
Os12g0183100|mRNA|AK064862|CDS+3'UTR	Similar to Branched-chain alpha keto-acid dehydrogenase E1 alpha subunit-like protein.	Os12g0183100	0.564677	1.86308	2.16325	5.22741	3.73917
Os03g0231600|mRNA|AK105963|CDS+3'UTR	Similar to Branched-chain-amino-acid aminotransferase 3, chloroplast precursor (EC 2.6.1.42) (Atbcat-3).	Os03g0231600	2.22864	2.59427	3.83055	3.32851	1.30956
Os02g0115700|mRNA|AK061923|CDS+3'UTR	Similar to Catalase.	Os02g0115700	0.241484	0.280337	0.752412	0.80289	1.58717
Os04g0269600|mRNA|AK066445|CDS+3'UTR	Similar to cDNA clone:J023110G01, full insert sequence.	Os04g0269600	0.854385	0.156306	0.314195	0.263333	0.7389
Os10g0113100|mRNA|AK059942|CDS+3'UTR	Similar to cDNA clone:J033143K18, full insert sequence.	Os10g0113100	0.195477	0.129172	0.782848	0.814291	0.889336
Os02g0467600|mRNA|AK072588|CDS+3'UTR	Similar to Cinnamate 4-hydroxylase CYP73.	Os02g0467600	1.92419	15.0975	41.2875	3.91849	2.50206
Os06g0623200|mRNA|AK107469|CDS+3'UTR	Similar to Cinnamoyl-CoA reductase (EC 1.2.1.44).	Os06g0623200	0.486033	0.235944	3.12965	1.38918	3.73737
Os01g0528800|mRNA|AK068824|CDS+3'UTR	Similar to Cinnamyl alcohol dehydrogenase.	Os01g0528800	0.950555	1.18719	1.67119	3.92338	3.08384
Os08g0270400|COMBINER_EST|Os08g0270400|8	Similar to Cinnamyl alcohol dehydrogenase.	Os08g0270400	0.839861	0.421162	0.473373	0.270933	0.305541
Os03g0368600|COMBINER_EST|Os03g0368600|8	Similar to Class III peroxidase 42.	Os03g0368600	0.676995	0.523928	0.44329	0.235538	0.222364
Os10g0508000|COMBINER_EST|CI358539|1	Similar to C-terminal peptide-binding protein 1.	Os10g0508000	0.765492	0.417809	0.267713	0.187758	0.287909
Os09g0316000|COMBINER_EST|CI479564|0	Similar to cupin, RmlC-type.	Os09g0316000	0.301358	0.219782	0.50594	0.631408	0.963451
Os09g0528700|COMBINER_EST|Os09g0528700|8	Similar to Cytochrome p450 (CYP78A9).	Os09g0528700	3.06325	3.48389	4.00743	1.82562	1.97327
Os01g0854800|mRNA|AK109676|CDS+3'UTR	Similar to Cytochrome P450 86A1 (EC 1.14.-.-) (CYPLXXXVI) (P450-dependent fatty acid omega-hydroxylase).	Os01g0854800	0.178767	0.191515	1.71027	2.73829	2.72979
Os03g0140200|mRNA|AK061292|CDS+3'UTR	Similar to Cytochrome P450 86A1 (EC 1.14.-.-) (CYPLXXXVI) (P450-dependent fatty acid omega-hydroxylase).	Os03g0140200	0.184808	0.155529	0.45469	0.625874	1.38578
Os02g0503700|COMBINER_EST|Os02g0503700|8	Similar to Cytochrome P450 CYP81L6.	Os02g0503700	0.648087	0.260829	0.303999	0.276369	0.60025
Os03g0223100|mRNA|AK105985|CDS+3'UTR	Similar to Cytochrome P450 CYP94D27.	Os03g0223100	0.230011	0.293098	0.325319	0.262157	0.403274
Os04g0180400|mRNA|AK071546|CDS+3'UTR	Similar to Cytochrome P450 CYP99A1 (EC 1.14.-.-) (Fragment).	Os04g0180400	0.203223	0.614195	0.213107	1.25387	0.734236
Os03g0140100|mRNA|AK067844|CDS+3'UTR	Similar to Cytochrome P450 family protein.	Os03g0140100	0.0956191	0.198641	0.278374	0.363659	0.392781
Os04g0573900|mRNA|AK061650|CDS+3'UTR	Similar to cytochrome P450.	Os04g0573900	0.564926	0.730915	1.74904	3.63765	3.38278
Os06g0129900|mRNA|AK061981|CDS+3'UTR	Similar to cytochrome P450.	Os06g0129900	1.13728	3.16487	4.85409	5.14642	3.69669
Os08g0131100|mRNA|AK106843|CDS+3'UTR	Similar to Cytochrome P450.	Os08g0131100	0.32432	0.222279	1.30447	2.00288	2.55383
Os07g0603700|COMBINER_EST|CI151301|6	Similar to Cytochrome P-450.	Os07g0603700	0.464294	0.395778	0.424577	0.32633	0.268871
Os01g0858200|mRNA|AK108646|CDS+3'UTR	Similar to DEAH (Asp-Glu-Ala-His) box polypeptide 16.	Os01g0858200	1.09272	1.36869	2.04641	3.62357	3.64705
Os01g0848200|mRNA|AK101230|CDS+3'UTR	Similar to Delta 1-pyrroline-5-carboxylate synthetase (P5CS) [Includes: Glutamate 5-kinase (EC 2.7.2.11) (Gamma-glutamyl kinase) (GK); Gamma-glutamyl phosphate reductase (GPR) (EC 1.2.1.41) (Glutamate-5-semialdehyde dehydrogenase) (Glutamyl-gamma-semialdehyde dehydrogenase)].	Os01g0848200	0.784475	0.228815	0.270268	1.11371	1.0626
Os02g0504800|mRNA|AK069683|CDS+3'UTR	Similar to Delta-9 stearoyl-acyl carrier protein desaturase (EC 1.14.99.6) (Fragment).	Os02g0504800	2.87858	3.60541	5.07047	4.01771	3.60306
Os08g0515900|COMBINER_EST|CI514994|0	Similar to Dihydroflavonol-4-reductase.	Os08g0515900	0.262355	0.167672	1.93152	1.99337	2.36796
Os06g0110000|mRNA|AK069429|CDS+3'UTR	Similar to DWARF3 (Fragment).	Os06g0110000	0.446858	0.287139	0.212749	0.210945	0.298874
Os12g0138800|mRNA|AK064775|CDS+3'UTR	Similar to Elicitor-inducible cytochrome P450.	Os12g0138800	0.225846	0.222694	0.367604	0.743917	1.31032
Os06g0569500|mRNA|AF088220|CDS+3'UTR	Similar to Ent-kaurene oxidase 1 (Fragment).	Os06g0569500	0.66307	0.367139	0.332229	0.327852	0.321841
Os04g0459500|mRNA|AF010582|5'UTR+CDS	Similar to GADPH (383 AA) (Fragment).	Os04g0459500	1.00159	1.03463	1.24925	0.171327	0.113135
Os02g0744900|mRNA|AK098873|CDS+3'UTR	Similar to Geranylgeranyl reductase (Fragment).	Os02g0744900	0.989275	1.15112	1.15775	0.326233	0.148882
Os05g0560900|mRNA|AK063973|CDS+3'UTR	Similar to gibberellin 2-beta-dioxygenase.	Os05g0560900	0.583675	1.63661	3.32126	2.26044	3.11059
Os09g0426800|mRNA|AK060786|CDS+3'UTR	Similar to Glossy1 protein.	Os09g0426800	0.313042	0.22594	0.555347	0.710996	1.11186
Os04g0490000|mRNA|AK108365|CDS+3'UTR	Similar to Glutamate synthase [NADH], chloroplast precursor (EC 1.4.1.14) (NADH- GOGAT).	Os04g0490000	14.1316	13.0514	14.4554	2.75955	1.67208
Os02g0512400|mRNA|AK073461|CDS+3'UTR	Similar to Glutaredoxin.	Os02g0512400	0.837708	1.18921	0.473386	0.30298	0.247722
Os04g0631000|COMBINER_EST|Os04g0631000|8	Similar to H0105C05.4 protein.	Os04g0631000	0.851816	2.28275	7.75184	8.3246	7.5917
Os09g0493500|mRNA|AB110186|CDS+3'UTR	Similar to H0404F02.2 protein.	Os09g0493500	0.242587	0.122763	1.15574	2.46899	3.27397
Os04g0641400|mRNA|AK059892|CDS+3'UTR	Similar to H0423H10.3 protein.	Os04g0641400	0.427082	0.233468	0.190975	0.162339	0.140095
Os03g0745000|mRNA|AF140500|CDS+3'UTR	Similar to Heat stress transcription factor A-2a.	Os03g0745000	252.098	52.2048	20.4263	4.0867	1.55684
Os06g0603000|mRNA|AK068856|CDS+3'UTR	Similar to Heme oxygenase 1 (Fragment).	Os06g0603000	3.0935	4.64852	3.10098	1.86946	1.41016
Os02g0280700|mRNA|AK065581|CDS+3'UTR	Similar to Iron/ascorbate-dependent oxidoreductase.	Os02g0280700	0.702774	0.549653	0.434975	0.252085	0.27484
Os02g0320800|mRNA|AK111474|CDS+3'UTR	Similar to Iron/ascorbate-dependent oxidoreductase.	Os02g0320800	0.493962	0.969317	0.233883	0.444512	0.320319
Os05g0573200|mRNA|AF155334|CDS+3'UTR	Similar to Isocitrate dehydrogenase (Fragment).	Os05g0573200	1.21026	0.989727	0.328512	0.104417	0.0951269
Os06g0472200|mRNA|AK059428|CDS+3'UTR	Similar to Isoflavone reductase homolog Bet v 6.0101 (Fragment).	Os06g0472200	4.37652	6.32483	5.01808	2.22605	1.62611
Os10g0567400|mRNA|AB021310|CDS+3'UTR	Similar to Isoform 2 of Chlorophyllide a oxygenase, chloroplastic.	Os10g0567400	0.870478	1.19806	1.27361	0.225122	0.108287
Os05g0125500|mRNA|AK066314|CDS+3'UTR	Similar to Isovaleryl-CoA dehydrogenase, mitochondrial precursor (EC 1.3.99.10) (IVD).	Os05g0125500	0.675538	1.62327	2.35855	3.82249	3.3496
Os01g0842400|mRNA|AF047697|CDS+3'UTR	Similar to Laccase (EC 1.10.3.2).	Os01g0842400	0.288893	0.136007	0.243613	0.386035	0.35733
Os01g0842500|mRNA|AK066513|CDS+3'UTR	Similar to Laccase (EC 1.10.3.2).	Os01g0842500	0.328299	0.312966	0.579247	0.595524	1.24423
Os03g0273200|mRNA|AK060579|CDS+3'UTR	Similar to Laccase (EC 1.10.3.2).	Os03g0273200	0.143156	0.0821165	0.141609	0.203306	0.370519
Os03g0297900|COMBINER_EST|CI193735|6	Similar to laccase 90c.	Os03g0297900	0.346281	0.316398	2.14576	2.76895	3.62619
Os01g0827300|mRNA|AK071929|CDS+3'UTR	Similar to Laccase precursor (EC 1.10.3.2).	Os01g0827300	25.7602	66.0331	6.7865	4.26468	5.73947
Os03g0259400|COMBINER_EST|Os03g0259400|8	Similar to Leucoanthocyanidin reductase (EC 1.17.1.3) (Leucocyanidin reductase).	Os03g0259400	0.944878	0.313843	0.152905	0.108657	0.121089
Os03g0738600|mRNA|AK073529|CDS+3'UTR	Similar to Lipoxygenase L-2 (EC 1.13.11.12).	Os03g0738600	0.294538	0.204272	0.183607	0.75991	0.127212
Os02g0105400|mRNA|AK103257|CDS+3'UTR	Similar to L-lactate dehydrogenase A (EC 1.1.1.27) (LDH-A).	Os02g0105400	0.605696	0.55257	0.331384	0.213291	0.228888
Os04g0573100|mRNA|AK106787|CDS+3'UTR	Similar to Mandelonitrile lyase-like protein.	Os04g0573100	0.144473	0.196173	0.3409	0.68308	1.06112
Os10g0524500|mRNA|AF251031|CDS+3'UTR	Similar to Mandelonitrile lyase-like protein.	Os10g0524500	0.106432	0.108078	0.770844	2.49276	3.32511
Os12g0628500|mRNA|AK122063|CDS+3'UTR	Similar to Methionine aminopeptidase-like protein.	Os12g0628500	0.651663	0.853008	0.64366	6.25533	3.56792
Os03g0815200|mRNA|AK121351|CDS+3'UTR	Similar to Methylenetetrahydrofolate reductase (EC 1.5.1.20).	Os03g0815200	4.60109	7.27887	2.83363	1.18051	0.888451
Os06g0561000|mRNA|AK068862|CDS+3'UTR	Similar to Myo-inositol oxygenase.	Os06g0561000	0.344573	0.167903	0.391821	0.299633	0.630295
Os10g0113900|mRNA|AK107387|CDS+3'UTR	Similar to NAD(P)H-dependent oxidoreductase.	Os10g0113900	1.77149	0.984771	1.14483	6.98987	13.3151
Os05g0555600|mRNA|AK070485|CDS+3'UTR	Similar to NADH dependent Glutamate Synthase precursor (EC 1.4.1.14).	Os05g0555600	0.983632	0.831076	1.81938	4.57845	3.82566
Os10g0496900|mRNA|AK068143|CDS+3'UTR	Similar to NADPH:protochlorophyllide oxidoreductase porB (Fragment).	Os10g0496900	3.0146	1.01852	1.0487	0.491088	0.236337
Os08g0468100|mRNA|AK102363|CDS+3'UTR	Similar to Nitrate reductase.	Os08g0468100	0.897509	1.4129	1.63319	0.290271	0.25853
Os04g0361500|COMBINER_EST|Os04g0361500|8	Similar to OSIGBa0111E13.1 protein.	Os04g0361500	2.21636	2.80998	3.38487	4.26313	4.81749
Os10g0558700|mRNA|AK060854|CDS+3'UTR	Similar to Oxidoreductase, 2OG-Fe oxygenase family protein, expressed.	Os10g0558700	2.54517	34.2291	16.0827	5.49811	2.71984
Os06g0138200|mRNA|AK058914|CDS+3'UTR	Similar to Oxidoreductase.	Os06g0138200	4.80331	4.15613	1.65423	1.25565	0.956134
Os01g0369900|mRNA|AK100034|CDS+3'UTR	Similar to Oxo-phytodienoic acid reductase.	Os01g0369900	3.57446	2.48933	3.00885	2.17655	1.78639
Os02g0559400|mRNA|AK059887|CDS+3'UTR	Similar to Oxo-phytodienoic acid reductase.	Os02g0559400	3.67321	3.27704	1.40597	0.522334	0.483366
Os03g0405500|mRNA|AK069583|CDS+3'UTR	Similar to PDI-like protein.	Os03g0405500	0.657927	0.412538	0.359929	0.192501	0.238126
Os02g0783000|mRNA|AK105110|CDS+3'UTR	Similar to Pectin methylesterase 5 (Fragment).	Os02g0783000	0.401853	0.131653	0.204954	0.246901	0.313174
Os02g0288100|mRNA|AK107019|CDS+3'UTR	Similar to Pectinesterase (EC 3.1.1.11) (Fragment).	Os02g0288100	1.35101	0.543425	7.15061	0.107771	0.101345
Os07g0119400|mRNA|AY224490|CDS	Similar to Pectinesterase like protein.	Os07g0119400	1.11693	1.06255	0.710253	0.21268	0.240314
Os03g0234900|mRNA|AK104936|CDS+3'UTR	Similar to Peroxidase (EC 1.11.1.7).	Os03g0234900	0.322855	0.261449	0.366752	0.586979	0.713158
Os10g0109300|mRNA|AK061462|CDS+3'UTR	Similar to Peroxidase (EC 1.11.1.7).	Os10g0109300	0.272563	0.22346	0.316368	0.272997	0.427528
Os08g0532600|mRNA|AK119370|CDS+3'UTR	Similar to Peroxidase (Fragment).	Os08g0532600	1.01777	3.57762	6.98733	7.49998	7.21998
Os03g0121300|mRNA|AK064633|CDS+3'UTR	Similar to Peroxidase 1.	Os03g0121300	1.21057	2.10152	2.08676	4.01576	4.20089
Os06g0274800|mRNA|AK060295|CDS+3'UTR	Similar to Peroxidase 11 precursor (EC 1.11.1.7) (Atperox P11) (ATP23a/ATP23b).	Os06g0274800	0.126481	0.451368	1.64836	4.36519	5.94798
Os12g0530100|mRNA|AK109551|CDS+3'UTR	Similar to Peroxidase 24 precursor (EC 1.11.1.7) (Atperox P24) (ATP47).	Os12g0530100	0.150938	0.214563	0.597432	0.915647	1.92153
Os08g0302000|mRNA|AK106760|CDS+3'UTR	Similar to Peroxidase 40 precursor (EC 1.11.1.7) (Atperox P40).	Os08g0302000	0.304898	0.21265	0.293214	0.403894	0.496163
Os01g0543100|mRNA|AK105363|CDS+3'UTR	Similar to Peroxidase 72 precursor (EC 1.11.1.7) (Atperox P72) (PRXR8) (ATP6a).	Os01g0543100	0.903787	0.873385	0.575091	0.29091	0.290706
Os01g0963000|mRNA|AK061131|CDS+3'UTR	Similar to Peroxidase BP 1 precursor.	Os01g0963000	0.221445	0.34276	0.35567	0.198875	0.0927847
Os06g0547400|mRNA|AK121950|CDS+3'UTR	Similar to Peroxidase P7 (EC 1.11.1.7) (TP7).	Os06g0547400	0.297088	1.0791	2.38229	3.44608	3.9571
Os12g0112000|mRNA|AK069456|CDS+3'UTR	Similar to Peroxidase precursor (EC 1.11.1.7) (Fragment).	Os12g0112000	0.226404	0.315137	1.20958	1.69072	2.43545
Os04g0656800|mRNA|AK058886|CDS+3'UTR	Similar to Peroxidase precursor (EC 1.11.1.7).	Os04g0656800	0.948659	0.532764	0.291609	0.116701	0.172013
Os04g0223300|mRNA|AY382617|CDS+3'UTR	Similar to Peroxisome type ascorbate peroxidase.	Os04g0223300	5.32963	9.83257	3.83349	1.25471	1.15282
Os09g0538600|mRNA|AK108458|CDS+3'UTR	Similar to Peroxisome type ascorbate peroxidase.	Os09g0538600	0.853996	0.92764	1.60535	3.13486	3.2919
Os03g0805600|COMBINER_EST|CI439180|6	Similar to pheophorbide a oxygenase.	Os03g0805600	0.920479	1.58822	1.74471	0.270581	0.139535
Os07g0147500|mRNA|AK062172|CDS+3'UTR	Similar to Photosystem II 10 kDa polypeptide, chloroplast precursor.	Os07g0147500	0.267958	0.288352	1.56362	0.743096	0.853561
Os05g0181200|mRNA|AK105519|CDS+3'UTR	Similar to Phytochrome P450-like protein.	Os05g0181200	1.55302	2.20344	6.55633	5.69702	11.9082
Os07g0693800|mRNA|AK062022|CDS+3'UTR	Similar to Plastid omega-3 fatty acid desaturase (Fragment).	Os07g0693800	0.372332	0.458579	0.46387	0.251408	0.251545
Os06g0678800|mRNA|AK071465|CDS+3'UTR	Similar to Pollen-specific protein NTP303 precursor.	Os06g0678800	0.794385	0.586498	0.362625	0.270574	0.287483
Os04g0341100|COMBINER_EST|Os04g0341100|8	Similar to predicted protein.	Os04g0341100	1.3616	1.08869	1.55349	5.22132	7.53353
Os07g0493400|COMBINER_EST|Os07g0493400|8	Similar to predicted protein.	Os07g0493400	3.78408	4.55807	2.38852	1.54267	0.861213
Os07g0664600|mRNA|AK105211|CDS+3'UTR	Similar to predicted protein.	Os07g0664600	0.15686	0.114476	0.456909	0.758857	1.38453
Os09g0436500|mRNA|AK069129|CDS+3'UTR	Similar to predicted protein.	Os09g0436500	3.94864	2.89414	3.30191	2.20173	2.44866
Os03g0803500|mRNA|AK059759|CDS+3'UTR	Similar to Prolyl 4-hydroxylase alpha-1 subunit-like protein.	Os03g0803500	3.95946	4.28099	3.90866	1.66977	1.18799
Os03g0166200|COMBINER_EST|CI453100|2	Similar to Prolyl 4-hydroxylase.	Os03g0166200	2.57197	4.4604	4.09533	8.87998	6.41284
Os04g0678700|mRNA|AK065236|CDS+3'UTR	Similar to Protochlorophyllide reductase (EC 1.3.1.33) (PCR) (NADPH- protochlorophyllide oxidoreductase) (POR) (Fragment).	Os04g0678700	0.240513	0.407191	0.744907	0.19939	0.0983227
Os08g0379400|mRNA|AK069608|CDS+3'UTR	Similar to Quinone oxidoreductase-like protein.	Os08g0379400	42.4981	48.6481	14.9995	1.40818	0.683015
Os04g0372700|mRNA|AK062814|5'UTR+CDS	Similar to Quinone-oxidoreductase QR1 (Fragment).	Os04g0372700	2.51337	0.82285	0.316024	0.126309	0.325124
Os09g0438000|mRNA|AK109935|CDS+3'UTR	Similar to Respiratory burst oxidase-like protein E.	Os09g0438000	4.55334	4.21111	2.60893	2.03379	0.937983
Os10g0430200|mRNA|AK104047|CDS+3'UTR	Similar to Sinapyl alcohol dehydrogenase.	Os10g0430200	0.922908	0.432764	0.519697	0.313348	0.327703
Os10g0419500|mRNA|AK071316|CDS+3'UTR	Similar to SIPL.	Os10g0419500	3.62008	5.53808	2.48441	1.05778	0.956181
Os01g0971600|mRNA|AK070366|CDS+3'UTR	Similar to Sn-glycerol-3-phosphate dehydrogenase (Fragment).	Os01g0971600	0.622534	0.307808	0.277533	0.451264	0.729255
Os08g0199400|mRNA|AK105852|CDS+3'UTR	Similar to Stearoyl-acyl carrier protein desaturse (EC 1.14.99.6) (Fragment).	Os08g0199400	0.595246	0.171074	0.215121	0.261945	0.272715
Os03g0363600|mRNA|AK106658|CDS+3'UTR	Similar to Sugar transporter-like protein.	Os03g0363600	0.985021	0.62986	0.651032	5.81183	3.61597
Os07g0665200|mRNA|D01000|CDS+3'UTR	Similar to Superoxide dismutase.	Os07g0665200	2.71216	3.26236	3.49596	3.48953	3.10319
Os07g0529600|mRNA|AB110170|CDS+3'UTR	Similar to Thiazole biosynthetic enzyme 1-1, chloroplast precursor.	Os07g0529600	1.31136	0.812586	1.71029	5.68575	4.85843
Os07g0186000|mRNA|AK121423|CDS+3'UTR	Similar to Thioredoxin h isoform 1.	Os07g0186000	4.02968	5.08573	3.75784	2.96381	1.87959
Os04g0676100|COMBINER_EST|CI211634|6	Similar to Thioredoxin X, chloroplast precursor.	Os04g0676100	4.81898	4.09126	3.27208	1.8189	1.45815
Os11g0652900|COMBINER_EST|Os11g0652900|8	Similar to tropinone reductase 2.	Os11g0652900	1.67349	1.11035	1.43723	3.8685	7.35175
Os11g0654400|COMBINER_EST|Os11g0654400|8	Similar to tropinone reductase 2.	Os11g0654400	1.1779	1.09838	1.63191	4.96237	6.26779
Os11g0438700|mRNA|AK063434|CDS+3'UTR	Similar to Tropinone reductase-I (EC 1.1.1.206) (TR-I) (Tropine dehydrogenase).	Os11g0438700	0.221903	0.227179	0.246287	0.229342	0.381961
Os04g0581600|mRNA|AK101692|CDS+3'UTR	Similar to UDP-glucose dehydrogenase.	Os04g0581600	0.211217	0.889311	1.21339	3.2636	3.35342
Os05g0595100|mRNA|AB087745|CDS+3'UTR	Similar to UDP-glucose-4-epimerase.	Os05g0595100	3.52143	3.4364	2.42289	1.15844	1.27535
Os03g0429800|mRNA|AK065099|CDS+3'UTR	Similar to Xanthine dehydrogenase 1 (EC 1.1.1.204).	Os03g0429800	2.18141	4.10159	4.02157	3.40209	3.15484
Os01g0174900|mRNA|AK060966|CDS+3'UTR	Thioredoxin fold domain containing protein.	Os01g0174900	1.47293	1.60999	1.84339	7.04275	5.36201
Os01g0530400|mRNA|AK106476|CDS+3'UTR	Thioredoxin fold domain containing protein.	Os01g0530400	4.82993	6.88901	6.22635	4.60249	2.79815
Os04g0412800|mRNA|AK060508|CDS+3'UTR	Thioredoxin fold domain containing protein.	Os04g0412800	0.810024	0.180549	0.197425	0.0628211	0.194613
Os06g0593800|mRNA|AK062590|CDS+3'UTR	UDP-glucuronosyl/UDP-glucosyltransferase family protein.	Os06g0593800	1.09835	0.972495	0.798832	0.209617	0.212984
Os01g0716400|mRNA|AK066768|CDS+3'UTR	Violaxanthin de-epoxidase family protein.	Os01g0716400	12.083	7.13271	5.30145	4.33144	2.22978

## Sheet: AOX
ProbeName	RAP_ID	Annotation (Build 5)	ratio-20 min	ratio-60 min	ratio-2 h	ratio-4 h	ratio-8 h
Os04g0600200|mRNA|AB004864|CDS+3'UTR	Os04g0600200	Alternative oxidase 1a.	1.17301	2.88633	3.50728	3.29135	4.49841
Os04g0600200|mRNA|AB007452|CDS+3'UTR	Os04g0600200	Alternative oxidase 1a.	1.0008	2.33739	3.20815	2.97262	3.55728
Os04g0600200|mRNA|AK064040|CDS+3'UTR	Os04g0600200	Alternative oxidase 1a.	1.19603	2.99695	3.31463	3.39691	4.54638
Os04g0600300|mRNA|AB004865|CDS+3'UTR	Os04g0600300	Alternative oxidase 1b.	311.587	528.527	83.414	22.272	26.189
Os04g0600300|mRNA|AK107376|CDS+3'UTR	Os04g0600300	Alternative oxidase 1b.	304.759	516.047	81.8483	22.4241	25.3459

## Sheet: Cat
ProbeName	RAP_ID	Annotation (Build 5)	ratio-20 min	ratio-60 min	ratio-2 h	ratio-4 h	ratio-8 h
Os02g0115700|mRNA|AK061923|CDS+3'UTR	Os02g0115700	Similar to Catalase.	0.241484	0.280337	0.752412	0.80289	1.58717
Os02g0115700|mRNA|AK065094|CDS+3'UTR	Os02g0115700	Catalase isozyme A (EC 1.11.1.6) (CAT-A).	0.229567	0.264555	0.665243	0.737171	1.49565
Os02g0115700|mRNA|AK071061|CDS+3'UTR	Os02g0115700	Similar to Catalase.	0.251891	0.280071	0.647039	0.82754	1.61122
Os02g0115700|mRNA|AK099231|CDS+3'UTR	Os02g0115700	Catalase isozyme A (EC 1.11.1.6) (CAT-A).	0.235857	0.26314	0.651416	0.756255	1.48964
Os02g0115700|mRNA|AK099923|CDS+3'UTR	Os02g0115700	Catalase isozyme A (EC 1.11.1.6) (CAT-A).	0.245937	0.266808	0.681172	0.741342	1.51622
Os02g0115700|mRNA|X61626|CDS+3'UTR	Os02g0115700	Similar to Catalase.	0.232837	0.267364	0.6895	0.761897	1.5752

## Sheet: GST
ProbeName	RAP_ID	Annotation (Build 5)	ratio-20 min	ratio-60 min	ratio-2 h	ratio-4 h	ratio-8 h
Os01g0353400|COMBINER_EST|Os01g0353400|8	Os01g0353400	Similar to Glutathione S-transferase GST 8 (EC 2.5.1.18).	3.76179	2.23209	4.00605	1.14092	1.09917
Os01g0369700|mRNA|AF309382|CDS+3'UTR	Os01g0369700	Similar to Glutathione S-transferase GST 8 (EC 2.5.1.18).	4.99716	3.46158	5.67496	1.50328	1.31654
Os01g0369700|mRNA|AK063796|CDS+3'UTR	Os01g0369700	Similar to Glutathione S-transferase GST 8 (EC 2.5.1.18).	10.2049	12.702	8.21243	2.17627	1.76887
Os01g0369700|mRNA|AK101436|CDS+3'UTR	Os01g0369700	Similar to Glutathione S-transferase GST 8 (EC 2.5.1.18).	4.56614	2.617	4.73893	1.41373	1.31976
Os01g0370200|COMBINER_EST|Os01g0370200|8	Os01g0370200	Similar to Glutathione-S-transferase 19E50.	2.78938	1.13143	1.0476	0.213684	0.156036
Os01g0371200|mRNA|AJ002380|CDS	Os01g0371200	Similar to Glutathione-S-transferase 19E50.	13.5131	20.3316	8.44146	1.70163	0.83973
Os01g0371200|mRNA|AK058900|CDS+3'UTR	Os01g0371200	Similar to Glutathione-S-transferase 19E50.	9.11201	12.1843	6.89884	1.70697	0.986837
Os03g0135200|mRNA|AK059226|CDS+3'UTR	Os03g0135200	Similar to Glutathione S-transferase GST 9 (EC 2.5.1.18).	1.1563	0.706952	0.493156	0.171926	0.251933
Os07g0168300|mRNA|AK061436|CDS+3'UTR	Os07g0168300	Similar to Glutathione S-transferase GSTU6.	0.651691	0.426673	1.05097	4.79154	3.66336
Os07g0168300|mRNA|AK099137|CDS+3'UTR	Os07g0168300	Similar to Glutathione S-transferase GSTU6.	0.660112	0.421179	1.08098	4.64066	3.6624
Os10g0528100|mRNA|AK108376|CDS+3'UTR	Os10g0528100	Similar to Glutathione S-transferase GST 42 (EC 2.5.1.18) (Fragment).	6.70673	3.27783	9.16494	7.48767	7.38696
Os10g0529500|COMBINER_EST|CI555732|0	Os10g0529500	Similar to Glutathione-S-transferase 2.	1.01621	3.49659	5.39367	6.50818	6.24938
Os10g0530300|COMBINER_EST|Os10g0530300|8	Os10g0530300	Similar to Glutathione-S-transferase 2.	1.67516	1.06087	0.877731	0.1865	0.135009
Os10g0530900|mRNA|AF309376|CDS+3'UTR	Os10g0530900	Similar to Glutathione S-transferase GST 30 (EC 2.5.1.18).	0.194512	0.357197	1.82993	3.57833	4.00408
Os10g0530900|mRNA|AK059760|CDS+3'UTR	Os10g0530900	Similar to Glutathione S-transferase GST 30 (EC 2.5.1.18).	0.150647	0.404634	2.14631	4.66279	5.3679
Os10g0530900|mRNA|AK103699|CDS+3'UTR	Os10g0530900	Similar to Glutathione S-transferase GST 30 (EC 2.5.1.18).	0.222253	0.441315	2.00078	4.47202	5.0026
Os12g0210200|mRNA|AF309381|CDS+3'UTR	Os12g0210200	Similar to Glutathione S-transferase GST 18 (EC 2.5.1.18).	0.529772	0.382501	0.287371	0.299054	0.260514
Os12g0210200|mRNA|AK069105|CDS+3'UTR	Os12g0210200	Similar to Glutathione S-transferase GST 18 (EC 2.5.1.18).	0.513723	0.356683	0.280605	0.29982	0.254779

## Sheet: MDAR
ProbeName	RAP_ID	Annotation (Build 5)	ratio-20 min	ratio-60 min	ratio-2 h	ratio-4 h	ratio-8 h
Os04g0412500|mRNA|AK059525|CDS+3'UTR	Os04g0412500	Conserved hypothetical protein.	3.63746	4.8166	3.24238	1.52703	0.792336
Os08g0470200|mRNA|AK059773|CDS+3'UTR	Os08g0470200	Similar to carbonic anhydrase.	0.207882	0.245715	0.443477	0.401408	0.485338
Os08g0470200|mRNA|AK060039|CDS+3'UTR	Os08g0470200	Similar to Nectarin III.	0.199879	0.217945	0.400672	0.289736	0.342978

## Sheet: OsAPx
ProbeName	RAP_ID	Annotation (Build 5)	ratio-20 min	ratio-60 min	ratio-2 h	ratio-4 h	ratio-8 h
Os04g0223300|mRNA|AY382617|CDS+3'UTR	Os04g0223300	Similar to Peroxisome type ascorbate peroxidase.	5.32963	9.83257	3.83349	1.25471	1.15282
Os04g0602100|mRNA|AK069838|CDS+3'UTR	Os04g0602100	Plant ascorbate peroxidase domain containing protein.	0.509194	0.436061	0.362153	0.139659	0.104902
Os04g0602100|mRNA|AK121197|5'UTR+CDS	Os04g0602100	Similar to B0403H10-OSIGBa0105A11.15 protein.	0.831631	0.682824	0.637215	0.22488	0.189511
Os07g0694700|mRNA|AK068430|CDS+3'UTR	Os07g0694700	L-ascorbate peroxidase.	3.22661	0.894411	0.428262	0.293997	0.283897

## Sheet: OsGrx
ProbeName	RAP_ID	Annotation (Build 5)	ratio-20 min	ratio-60 min	ratio-2 h	ratio-4 h	ratio-8 h
Os01g0174900|mRNA|AK060966|CDS+3'UTR	Os01g0174900	Thioredoxin fold domain containing protein.	1.47293	1.60999	1.84339	7.04275	5.36201
Os01g0174900|mRNA|AK104777|CDS+3'UTR	Os01g0174900	Thioredoxin fold domain containing protein.	1.66592	1.64599	1.86499	6.82987	5.29955
Os01g0530400|mRNA|AK106476|CDS+3'UTR	Os01g0530400	Thioredoxin fold domain containing protein.	4.82993	6.88901	6.22635	4.60249	2.79815
Os01g0530400|mRNA|AK120148|CDS+3'UTR	Os01g0530400	Similar to cDNA clone:002-104-C07, full insert sequence.	3.36642	4.94877	3.13735	1.88206	1.34716
Os02g0512400|mRNA|AK073461|CDS+3'UTR	Os02g0512400	Similar to Glutaredoxin.	0.837708	1.18921	0.473386	0.30298	0.247722

## Sheet: OsPrx
ProbeName	RAP_ID	Annotation (Build 5)	ratio-20 min	ratio-60 min	ratio-2 h	ratio-4 h	ratio-8 h
Os01g0543100|mRNA|AK105363|CDS+3'UTR	Os01g0543100	Similar to Peroxidase 72 precursor (EC 1.11.1.7) (Atperox P72) (PRXR8) (ATP6a).	0.903787	0.873385	0.575091	0.29091	0.290706
Os01g0963000|mRNA|AK061131|CDS+3'UTR	Os01g0963000	Similar to Peroxidase BP 1 precursor.	0.221445	0.34276	0.35567	0.198875	0.0927847
Os01g0963000|mRNA|AK104277|CDS+3'UTR	Os01g0963000	Similar to Peroxidase BP 1 precursor.	0.225404	0.31704	0.352473	0.178938	0.0770872
Os01g0963200|COMBINER_EST|CI461123|6	Os01g0963200	Peroxidase BP 1 precursor.	0.260939	0.182817	0.277247	0.315661	0.531288
Os03g0121300|mRNA|AK064633|CDS+3'UTR	Os03g0121300	Similar to Peroxidase 1.	1.21057	2.10152	2.08676	4.01576	4.20089
Os03g0121300|mRNA|AK120047|CDS+3'UTR	Os03g0121300	Similar to Peroxidase 5.	1.16338	2.03443	2.23818	3.93354	4.28453
Os03g0234900|mRNA|AK104936|CDS+3'UTR	Os03g0234900	Similar to Peroxidase (EC 1.11.1.7).	0.322855	0.261449	0.366752	0.586979	0.713158
Os03g0368600|COMBINER_EST|Os03g0368600|8	Os03g0368600	Similar to Class III peroxidase 42.	0.676995	0.523928	0.44329	0.235538	0.222364
Os03g0368900|mRNA|AK099751|CDS+3'UTR	Os03g0368900	Haem peroxidase family protein.	0.292698	0.18094	0.589627	1.0022	1.95389
Os03g0368900|mRNA|AK120411|CDS+3'UTR	Os03g0368900	Haem peroxidase family protein.	0.237136	0.163013	0.635584	0.911219	1.76953
Os04g0628200|mRNA|AK068148|CDS+3'UTR	Os04g0628200	Haem peroxidase, plant/fungal/bacterial family protein.	1.21272	1.1727	1.18958	3.94482	5.0833
Os04g0656800|mRNA|AK058886|CDS+3'UTR	Os04g0656800	Similar to Peroxidase precursor (EC 1.11.1.7).	0.948659	0.532764	0.291609	0.116701	0.172013
Os05g0135500|mRNA|AK060998|CDS+3'UTR	Os05g0135500	Haem peroxidase family protein.	0.161617	0.10661	0.471442	1.24423	3.00118
Os05g0135500|mRNA|AK061553|CDS+3'UTR	Os05g0135500	Haem peroxidase family protein.	0.23051	0.109661	0.504278	0.968938	2.16639
Os05g0135500|mRNA|AK104219|CDS+3'UTR	Os05g0135500	Haem peroxidase family protein.	0.133917	0.0548672	0.438188	1.16959	2.89875
Os05g0135500|mRNA|AK104300|CDS+3'UTR	Os05g0135500	Haem peroxidase family protein.	0.130324	0.0818454	0.405441	1.23574	2.90304
Os05g0135500|mRNA|AK104641|CDS+3'UTR	Os05g0135500	Haem peroxidase family protein.	0.0970045	0.0635399	0.354243	1.38324	3.08089
Os05g0135500|mRNA|AK106200|CDS+3'UTR	Os05g0135500	Haem peroxidase family protein.	0.126163	0.0534462	0.399083	1.07719	2.61353
Os05g0135500|mRNA|AK120246|CDS+3'UTR	Os05g0135500	Haem peroxidase family protein.	0.135918	0.0577347	0.457125	1.16702	2.65692
Os05g0231900|COMBINER_EST|CI501135|6	Os05g0231900	Hypothetical conserved gene.	0.105642	0.149132	1.40439	3.22642	4.263
Os06g0274800|mRNA|AK060295|CDS+3'UTR	Os06g0274800	Similar to Peroxidase 11 precursor (EC 1.11.1.7) (Atperox P11) (ATP23a/ATP23b).	0.126481	0.451368	1.64836	4.36519	5.94798
Os06g0472900|mRNA|AK072945|CDS+3'UTR	Os06g0472900	Haem peroxidase family protein.	0.21411	0.311275	0.731389	0.255894	0.312964
Os06g0547400|mRNA|AK121950|CDS+3'UTR	Os06g0547400	Similar to Peroxidase P7 (EC 1.11.1.7) (TP7).	0.297088	1.0791	2.38229	3.44608	3.9571
Os06g0695300|COMBINER_EST|CI548521|1	Os06g0695300	Haem peroxidase, plant/fungal/bacterial family protein.	0.168494	0.393113	0.371814	0.28238	0.499277
Os08g0302000|mRNA|AK106760|CDS+3'UTR	Os08g0302000	Similar to Peroxidase 40 precursor (EC 1.11.1.7) (Atperox P40).	0.304898	0.21265	0.293214	0.403894	0.496163
Os10g0109300|mRNA|AK061462|CDS+3'UTR	Os10g0109300	Similar to Peroxidase (EC 1.11.1.7).	0.272563	0.22346	0.316368	0.272997	0.427528
Os10g0109300|mRNA|AK104633|CDS+3'UTR	Os10g0109300	Similar to Peroxidase (EC 1.11.1.7).	0.265806	0.240386	0.315187	0.280229	0.425142
Os10g0109300|mRNA|AK104730|CDS+3'UTR	Os10g0109300	Similar to Peroxidase (EC 1.11.1.7).	0.271353	0.228788	0.326965	0.281275	0.464063
Os11g0112400|COMBINER_EST|CI529944|0	Os11g0112400	Peroxidase (EC 1.11.1.7).	0.208311	0.284584	1.11272	1.40653	1.89901
Os12g0112000|mRNA|AK069456|CDS+3'UTR	Os12g0112000	Similar to Peroxidase precursor (EC 1.11.1.7) (Fragment).	0.226404	0.315137	1.20958	1.69072	2.43545
Os12g0530100|mRNA|AK109551|CDS+3'UTR	Os12g0530100	Similar to Peroxidase 24 precursor (EC 1.11.1.7) (Atperox P24) (ATP47).	0.150938	0.214563	0.597432	0.915647	1.92153

## Sheet: OsPrxR
ProbeName	RAP_ID	Annotation (Build 5)	ratio-20 min	ratio-60 min	ratio-2 h	ratio-4 h	ratio-8 h
Os07g0638300|mRNA|AK101401|CDS+3'UTR	Os07g0638300	Similar to 1-Cys peroxiredoxin.	85.931	212.489	99.2215	15.5306	3.69465
Os07g0638300|mRNA|AK102982|CDS+3'UTR	Os07g0638300	Similar to 1-Cys peroxiredoxin.	87.9319	193.713	94.9999	16.4017	4.54674
Os07g0638300|mRNA|AY336994|CDS+3'UTR	Os07g0638300	Similar to 1-Cys peroxiredoxin.	122.051	282.885	143.099	23.265	5.10521
Os07g0638300|mRNA|D63917|CDS+3'UTR	Os07g0638300	Similar to 1-Cys peroxiredoxin.	102.981	249.918	118.165	18.176	4.55999

## Sheet: OsRboh
ProbeName	RAP_ID	Annotation (Build 5)	ratio-20 min	ratio-60 min	ratio-2 h	ratio-4 h	ratio-8 h
Os09g0438000|mRNA|AK109935|CDS+3'UTR	Os09g0438000	Similar to Respiratory burst oxidase-like protein E.	4.55334	4.21111	2.60893	2.03379	0.937983

[truncated: 4 more sheets: SOD, Trx, P450, Others]
