# Supplementary material for: Expression Profile in Rice Panicle: Insights into Heat Response Mechanism at Reproductive Stage
Source: PLoS One. 2012 Nov 14;7(11):e49652. doi: 10.1371/journal.pone.0049652 (PMC3498232; doi:10.1371/journal.pone.0049652)
Supplement: Table S8 — The HR signaling-related genes. (XLSX) [file pone.0049652.s008.xlsx]

## Sheet: phytohormone-related genes
ABA
ProbeName	RAP_ID	Annotation (Build 5)	ratio-20 min	ratio-60 min	ratio-2 h	ratio-4 h	ratio-8 h
Os01g0128300|COMBINER_EST|CB656727|7	Os01g0128300	Similar to predicted protein.	2.29137	3.09499	3.52455	1.65366	1.61539
Os01g0867300|mRNA|AK067919|CDS+3'UTR	Os01g0867300	Similar to OSE2-like protein (Fragment).	3.61778	4.51777	4.51059	2.43672	2.88165
Os01g0867300|mRNA|U25283|CDS+3'UTR	Os01g0867300	Similar to OSE2-like protein (Fragment).	3.29315	4.59436	4.42189	2.5084	2.79583
Os02g0833600|mRNA|AK061086|CDS+3'UTR	Os02g0833600	Similar to Basic leucine zipper transcription factor (Fragment).	6.40432	6.53326	4.8659	2.55994	2.58796
Os06g0604200|mRNA|AK100278|CDS+3'UTR	Os06g0604200	Phospholipase D.	0.467389	0.213021	0.234467	0.198669	0.167354
Os06g0604200|mRNA|AK121264|CDS+3'UTR	Os06g0604200	Phospholipase D.	0.323255	0.227403	0.239397	0.157085	0.142317
Os06g0604300|mRNA|AK119861|CDS+3'UTR	Os06g0604300	Phospholipase D.	0.2776	0.643553	0.618119	0.310974	0.11792
Os08g0472000|mRNA|AK062347|CDS+3'UTR	Os08g0472000	Similar to bZIP transcription factor TRAB1.	5.68845	4.69648	3.30026	2.74913	2.02918
Os12g0586100|mRNA|AB125310|CDS+3'UTR	Os12g0586100	Serine/threonine-protein kinase SAPK9 (EC 2.7.1.37) (Osmotic stress/abscisic acid-activated protein kinase 9).	0.507555	0.28865	0.369122	3.37971	6.46716
Os12g0586100|mRNA|AK069697|CDS+3'UTR	Os12g0586100	Serine/threonine-protein kinase SAPK9 (EC 2.7.1.37) (Osmotic stress/abscisic acid-activated protein kinase 9).	0.557176	0.285646	0.43474	3.84844	8.06892
Auxin
ProbeName	RAP_ID	Annotation (Build 5)	ratio-20 min	ratio-60 min	ratio-2 h	ratio-4 h	ratio-8 h
Os01g0670800|mRNA|AB071291|CDS+3'UTR	Os01g0670800	Similar to Auxin response factor 2.	0.594305	0.47886	0.322322	0.216023	0.13126
Os01g0802700|mRNA|AK059229|CDS+3'UTR	Os01g0802700	Auxin efflux carrier domain containing protein.	3.73651	2.96727	2.51725	0.71655	0.299074
Os01g0856500|mRNA|AK103981|CDS+3'UTR	Os01g0856500	Similar to auxin transporter-like protein 1.	0.476661	0.469984	0.408115	0.274986	0.329684
Os02g0228900|mRNA|AK121870|CDS+3'UTR	Os02g0228900	Similar to Auxin-responsive protein IAA18 (Indoleacetic acid-induced protein 18).	0.475418	0.419944	0.419142	0.226247	0.279208
Os02g0635200|mRNA|AB027054|CDS	Os02g0635200	Similar to Nitrilase 2 (EC 3.5.5.1).	4.62839	5.78186	4.43315	2.42158	1.36295
Os02g0635200|mRNA|AK069985|CDS+3'UTR	Os02g0635200	Similar to Nitrilase 2 (EC 3.5.5.1).	4.08866	5.60772	4.22551	2.40858	1.53635
Os02g0635200|mRNA|AK104033|CDS+3'UTR	Os02g0635200	Similar to Nitrilase 2 (EC 3.5.5.1).	4.14488	5.84759	4.488	2.30464	1.57547
Os02g0635200|mRNA|AK121244|CDS+3'UTR	Os02g0635200	Similar to Nitrilase 2 (EC 3.5.5.1).	4.46537	5.94316	4.56604	2.34795	1.60351
Os02g0643800|COMBINER_EST|CI556117|0	Os02g0643800	Auxin responsive SAUR protein family protein.	2.65271	3.6036	3.55819	1.34197	1.69903
Os02g0805100|mRNA|AK073365|CDS+3'UTR	Os02g0805100	Similar to Auxin-responsive protein IAA12 (Indoleacetic acid-induced protein 12) (BODENLOS protein).	1.64809	5.81253	13.4744	1.48866	1.65126
Os03g0796000|mRNA|AK064912|CDS+3'UTR	Os03g0796000	Similar to Ripening-associated protein (Fragment).	16.3344	15.195	7.8895	2.71337	1.78674
Os03g0796000|mRNA|U16747|UTR	Os03g0796000	Hypothetical conserved gene.	15.4898	15.7355	10.4141	3.43542	2.28556
Os04g0337500|mRNA|AK068652|CDS+3'UTR	Os04g0337500	Aldo/keto reductase family protein.	0.139315	0.101976	0.53457	0.315292	0.828125
Os04g0337500|mRNA|AK104524|CDS+3'UTR	Os04g0337500	Aldo/keto reductase family protein.	0.361986	0.107945	0.472896	0.31689	0.922004
Os04g0341100|COMBINER_EST|Os04g0341100|8	Os04g0341100	Similar to predicted protein.	1.3616	1.08869	1.55349	5.22132	7.53353
Os04g0662400|mRNA|AK108652|CDS+3'UTR	Os04g0662400	Auxin responsive SAUR protein family protein.	0.879236	1.5888	1.56727	0.274437	0.276917
Os04g0679400|mRNA|AK065314|CDS+3'UTR	Os04g0679400	Similar to Ripening-associated protein (Fragment).	0.707385	2.55931	3.32197	2.84195	3.08877
Os04g0679400|mRNA|AK068608|CDS+3'UTR	Os04g0679400	Similar to H0801D08.15 protein.	2.61343	5.12857	4.99164	2.3289	1.9074
Os04g0679400|mRNA|AK099009|CDS+3'UTR	Os04g0679400	Similar to Ripening-associated protein (Fragment).	0.778891	2.71262	3.17427	2.97523	3.07112
Os04g0679400|mRNA|AK099368|CDS+3'UTR	Os04g0679400	Similar to Ripening-associated protein (Fragment).	0.764877	2.63665	3.52352	3.1012	2.9743
Os04g0679400|mRNA|AK099653|CDS+3'UTR	Os04g0679400	Similar to Ripening-associated protein (Fragment).	0.73388	2.69891	3.57534	3.0931	3.26803
Os04g0679400|mRNA|AK119666|CDS+3'UTR	Os04g0679400	Similar to Ripening-associated protein (Fragment).	0.718681	2.11427	3.30331	2.95155	3.04964
Os04g0679400|mRNA|AK121152|CDS+3'UTR	Os04g0679400	Similar to Ripening-associated protein (Fragment).	0.737421	2.69537	3.61423	2.97538	3.05273
Os05g0481900|mRNA|AK106744|CDS+3'UTR	Os05g0481900	Auxin efflux carrier domain containing protein.	0.531041	0.451056	0.291451	0.14129	0.215636
Os05g0481900|mRNA|AK119626|CDS+3'UTR	Os05g0481900	Auxin efflux carrier domain containing protein.	0.544314	0.51403	0.314151	0.158753	0.235105
Os06g0166500|mRNA|AK102541|CDS+3'UTR	Os06g0166500	Similar to Auxin-responsive protein IAA20 (Indoleacetic acid-induced protein 20).	0.450401	1.02502	0.431044	0.228179	0.2847
Os06g0660200|mRNA|AK101191|CDS+3'UTR	Os06g0660200	Similar to Auxin efflux carrier protein.	0.977972	0.23298	0.615466	0.212207	0.570935
Os06g0691400|mRNA|AK107208|CDS+3'UTR	Os06g0691400	Similar to IAA-amino acid conjugate hydrolase-like protein (Fragment).	0.2777	1.32693	3.22703	1.08095	1.25008
Os06g0702000|mRNA|AK070950|UTR	Os06g0702000	Auxin responsive SAUR protein family protein.	0.0846226	0.204912	0.615268	1.11056	1.08216
Os06g0714300|mRNA|AK107043|CDS+3'UTR	Os06g0714300	Auxin responsive SAUR protein family protein.	1.81312	4.36867	4.58204	2.88148	3.43128
Os07g0249900|mRNA|AK110676|CDS+3'UTR	Os07g0249900	Peptidase M20 family protein.	0.33181	0.17398	1.05743	0.872764	1.36168
Os08g0118500|COMBINER_EST|CI261909|6	Os08g0118500	Similar to Auxin-induced SAUR-like protein.	9.67569	9.19245	10.263	3.9088	2.41419
Os08g0524400|COMBINER_EST|AU173429|7	Os08g0524400	Protein of unknown function DUF568, DOMON-like domain containing protein.	0.376885	0.281771	0.228774	0.22351	0.310275
Os09g0437100|COMBINER|CI213992|6	Os09g0437100	Auxin responsive SAUR protein family protein.	0.281762	0.510027	0.483295	0.302245	0.508919
Os09g0500900|COMBINER_EST|CI544499|0	Os09g0500900	Protein of unknown function DUF568 domain containing protein.	0.414892	0.254465	0.332514	0.298705	0.442686
Os09g0545300|COMBINER_EST|CI443601|0	Os09g0545300	Small auxin-up RNA39.;Negative regulator of auxin synthesis and transport.;SAUR family protein.	4.94571	11.0002	19.6537	19.4819	29.7808
CK
ProbeName	RAP_ID	Annotation (Build 5)	ratio-20 min	ratio-60 min	ratio-2 h	ratio-4 h	ratio-8 h
Os02g0557800|mRNA|AK069453|CDS+3'UTR	Os02g0557800	A-type response regulator 2.;Cytokinin signalling.	0.650398	0.512196	0.399931	0.288203	0.29186
Os02g0631700|COMBINER_EST|Os02g0631700|8	Os02g0631700	A-type response regulator 11.;Cytokinin signalling.	0.316467	0.388899	0.494023	0.338495	0.300721
Os04g0212200|COMBINER_EST|Os04g0212200|8	Os04g0212200	Similar to protein binding.	5.20729	31.6985	21.2725	1.4961	1.28099
Os04g0442300|mRNA|AK072736|CDS+3'UTR	Os04g0442300	A-type response regulator 1.;Cytokinin signalling.	1.50314	0.902456	0.522676	0.29449	0.181337
Os05g0521300|mRNA|AK072664|CDS+3'UTR	Os05g0521300	Similar to Histidine-containing phosphotransfer protein 4.	1.19021	2.20332	2.50166	4.69318	3.09337
Os12g0454800|mRNA|AY572461|CDS+3'UTR	Os12g0454800	CHASE domain receptor-like serine/threonine kinase.	0.324839	0.28396	0.529355	0.534756	0.795798
BR
ProbeName	locus	annotation	ratio-20min	ratio-60min	ratio-2h	ratio-4h	ratio-8h
Os01g0103600|mRNA|AK059848|CDS+3'UTR	Os01g0103600	Emopamil-binding family protein.	0.77763	0.461035	0.368745	0.229595	0.278816
Os04g0469800|mRNA|AB158759|CDS+3'UTR	Os04g0469800	Cytochrome P450 724B1 (EC 1.14.-.-) (OsDWARF11) (Dwarf protein 11).	0.269026	0.29943	0.366995	0.33635	0.324086
Os04g0469800|mRNA|AK101419|CDS+3'UTR	Os04g0469800	Similar to OSIGBa0124N08.3 protein.	0.287699	0.321005	0.379231	0.334802	0.336762
Os04g0469800|mRNA|AK106528|CDS+3'UTR	Os04g0469800	Cytochrome P450 724B1 (EC 1.14.-.-) (OsDWARF11) (Dwarf protein 11).	0.275072	0.309681	0.350517	0.335723	0.321058
Os07g0136800|mRNA|AK073763|CDS+3'UTR	Os07g0136800	Homeodomain-like containing protein.	7.23441	4.46586	1.55686	2.36239	2.87334
Ethylene
ProbeName	RAP_ID	Annotation (Build 5)	ratio-20 min	ratio-60 min	ratio-2 h	ratio-4 h	ratio-8 h
Os01g0536400|COMBINER_EST|CI557769|0	Os01g0536400	Isopenicillin N synthase family protein.	7.42223	5.53596	2.82324	1.03383	0.958794
Os02g0320800|mRNA|AK111474|CDS+3'UTR	Os02g0320800	Similar to Iron/ascorbate-dependent oxidoreductase.	0.493962	0.969317	0.233883	0.444512	0.320319
Os02g0574800|mRNA|AK108451|CDS+3'UTR	Os02g0574800	Ethylene insensitive 3 domain containing protein.	2.05408	3.57949	5.55051	4.31049	6.6161
Os03g0759700|mRNA|AK072833|CDS+3'UTR	Os03g0759700	Similar to ER33 protein (Fragment).	0.612524	0.502377	0.302304	0.295113	0.430372
Os04g0581100|mRNA|AK100853|CDS+3'UTR	Os04g0581100	2OG-Fe(II) oxygenase domain containing protein.	0.678072	1.94147	0.299011	0.753414	0.239915
Os05g0560900|mRNA|AK063973|CDS+3'UTR	Os05g0560900	Similar to gibberellin 2-beta-dioxygenase.	0.583675	1.63661	3.32126	2.26044	3.11059
Os05g0560900|mRNA|AK101758|CDS+3'UTR	Os05g0560900	Isopenicillin N synthase family protein.	0.74613	1.63452	3.01371	2.10477	3.05092
Os06g0592500|mRNA|AK119729|CDS+3'UTR	Os06g0592500	Similar to Ethylene-responsive transcriptional coactivator.	12.9247	11.4528	9.70065	6.56571	4.77444
Os06g0592500|mRNA|AK122052|CDS+3'UTR	Os06g0592500	Similar to Ethylene-responsive transcriptional coactivator.	10.6381	9.93619	9.31685	5.8741	4.4227
Os09g0570800|mRNA|AK064211|CDS+3'UTR	Os09g0570800	Isopenicillin N synthase family protein.	2.71274	5.39947	4.71761	3.55706	3.77347
Os10g0558200|COMBINER_EST|Os10g0558200|8	Os10g0558200	2OG-Fe(II) oxygenase domain containing protein.	0.49445	0.281022	0.212043	0.114351	0.0976966
GA
ProbeName	RAP_ID	Annotation (Build 5)	ratio-20 min	ratio-60 min	ratio-2 h	ratio-4 h	ratio-8 h
Os05g0376800|mRNA|AK106775|CDS+3'UTR	Os05g0376800	Gibberellin regulated protein family protein.	0.366211	0.201594	0.25816	0.205091	0.438721
Os06g0569500|mRNA|AF088220|CDS+3'UTR	Os06g0569500	Similar to Ent-kaurene oxidase 1 (Fragment).	0.66307	0.367139	0.332229	0.327852	0.321841
Os09g0414900|mRNA|AK059073|CDS+3'UTR	Os09g0414900	Similar to GASA5-like protein (Fragment).	0.849172	0.432862	0.252815	0.0977491	0.108788
JA
ProbeName	RAP_ID	Annotation (Build 5)	ratio-20 min	ratio-60 min	ratio-2 h	ratio-4 h	ratio-8 h
Os02g0817700|mRNA|AK061948|CDS+3'UTR	Os02g0817700	Similar to 3-ketoacyl-CoA thiolase (Fragment).	1.08971	2.22023	3.28551	3.05099	2.4379
Os02g0817700|mRNA|AK069768|CDS+3'UTR	Os02g0817700	Similar to 3-ketoacyl-CoA thiolase (Fragment).	1.2546	2.70719	3.83837	3.41785	2.8423
Os05g0102000|mRNA|AK064690|CDS+3'UTR	Os05g0102000	SAM dependent carboxyl methyltransferase family protein.	0.295952	0.765373	0.60735	0.161348	0.104735
Os12g0559200|mRNA|AJ270938|CDS+3'UTR	Os12g0559200	Lipoxygenase (EC 1.13.11.12).	0.279573	0.266943	0.398684	0.841186	0.476203

## Sheet: signal transduction
Light
ProbeName	RAP_ID	Annotation (Build 5)	ratio-20 min	ratio-60 min	ratio-2 h	ratio-4 h	ratio-8 h
Os01g0102900|mRNA|AK067670|CDS+3'UTR	Os01g0102900	Light regulated Lir1 family protein.	0.593896	2.68167	6.18188	11.2167	7.28676
Os01g0102900|mRNA|AK120535|CDS+3'UTR	Os01g0102900	Light regulated Lir1 family protein.	0.397785	2.31691	4.85488	21.3958	14.368
Os01g0102900|mRNA|X68807|CDS+3'UTR	Os01g0102900	Light regulated Lir1 family protein.	0.56793	1.71508	3.52046	6.33631	5.40593
Os01g0246400|mRNA|AK062972|CDS+3'UTR	Os01g0246400	Similar to Low molecular mass early light-inducible protein HV90, chloroplast precursor (ELIP).	42.8662	14.4569	7.49379	0.440903	0.248281
Os06g0654300|COMBINER_EST|Os06g0654300|8	Os06g0654300	Similar to Histidine kinase (Fragment).	0.327054	0.280867	0.40025	0.336868	0.283013
Os07g0178700|COMBINER_EST|CI154070|6	Os07g0178700	Similar to Low molecular mass early light-inducible protein HV90, chloroplast precursor (ELIP).	8.43733	1.63068	0.744753	0.0811867	0.052229
Os07g0178800|mRNA|AF017356|CDS+3'UTR	Os07g0178800	Similar to Low molecular mass early light-inducible protein HV90, chloroplast precursor (ELIP).	8.66464	1.86026	0.678157	0.0975939	0.119188
Os12g0117600|mRNA|AK066267|CDS+3'UTR	Os12g0117600	BTB domain containing protein.	3.8635	3.42288	1.78983	0.906898	0.805397
LRR
ProbeName	RAP_ID	Annotation (Build 5)	ratio-20 min	ratio-60 min	ratio-2 h	ratio-4 h	ratio-8 h
Os01g0607900|COMBINER_EST|CI194762|6	Os01g0607900	Serine/threonine protein kinase-related domain containing protein.	0.551429	0.334246	0.302441	0.310342	0.395
Os01g0819100|COMBINER_EST|CI429121|6	Os01g0819100	Similar to predicted protein.	0.517149	0.43884	0.297861	0.285451	0.335756
Os02g0111800|mRNA|AK110271|CDS+3'UTR	Os02g0111800	Protein kinase, core domain containing protein.	0.353042	0.221968	0.274683	0.355665	0.284682
Os02g0155400|mRNA|AK107566|CDS+3'UTR	Os02g0155400	Leucine-rich repeat, N-terminal domain containing protein.	3.04345	14.2656	3.4815	1.26455	0.499808
Os02g0228300|mRNA|AK111620|CDS+3'UTR	Os02g0228300	Protein kinase, core domain containing protein.	0.117631	0.252024	0.697197	0.796766	1.75577
Os02g0615500|mRNA|AK100073|CDS+3'UTR	Os02g0615500	Protein kinase, core domain containing protein.	2.77025	5.20223	4.57767	5.20206	4.81632
Os03g0297800|mRNA|AK107121|CDS+3'UTR	Os03g0297800	Protein kinase, core domain containing protein.	0.963011	0.213508	0.150767	0.0391972	0.0895387
Os03g0436600|COMBINER_EST|Os03g0436600|8	Os03g0436600	Conserved hypothetical protein.	0.682199	0.420318	0.501355	0.220172	0.215869
Os07g0134200|COMBINER_EST|CI561565|0	Os07g0134200	Receptor-like protein kinase 3.	0.351169	0.293838	0.368223	0.323228	0.338574
Os07g0145400|mRNA|AK103262|CDS+3'UTR	Os07g0145400	Protein kinase, core domain containing protein.	0.974404	0.709641	0.385246	0.319099	0.278909
Os11g0107700|mRNA|AK073061|CDS+3'UTR	Os11g0107700	Protein kinase, core domain containing protein.	0.763111	0.164095	0.174279	0.0691708	0.202234
Os11g0107700|mRNA|AK109643|CDS+3'UTR	Os11g0107700	Similar to Leucine Rich Repeat family protein, expressed.	1.14672	0.181148	0.125345	0.0616501	0.181283
Os12g0107700|COMBINER_EST|CI273097|6	Os12g0107700	Similar to Leucine Rich Repeat family protein, expressed.	0.864236	0.160867	0.195038	0.0601989	0.19243
Os12g0235700|COMBINER_EST|CI549222|1	Os12g0235700	Serine/threonine protein kinase-related domain containing protein.	0.234444	0.291735	0.439092	1.50492	1.59644
DUF26
ProbeName	RAP_ID	Annotation (Build 5)	ratio-20 min	ratio-60 min	ratio-2 h	ratio-4 h	ratio-8 h
Os02g0116700|mRNA|AK109928|CDS+3'UTR	Os02g0116700	Protein kinase, core domain containing protein.	1.14803	1.09349	0.995218	0.276912	0.212954
Os03g0221700|mRNA|AK060765|CDS+3'UTR	Os03g0221700	Serine/threonine protein kinase-related domain containing protein.	0.227667	0.30768	0.477593	0.798292	0.93339
Os03g0221700|mRNA|AK098866|CDS+3'UTR	Os03g0221700	Serine/threonine protein kinase-related domain containing protein.	0.169199	0.29188	0.55903	0.572669	0.729488
Os03g0221700|mRNA|AK098871|CDS+3'UTR	Os03g0221700	Serine/threonine protein kinase-related domain containing protein.	0.171169	0.304872	0.589288	0.625344	0.78062
Os03g0277600|mRNA|AK061425|CDS+3'UTR	Os03g0277600	Similar to (clone wusl1032) mRNA sequence.	1.60333	2.70097	3.32756	4.33025	1.49213
Os03g0277700|mRNA|AK061148|CDS+3'UTR	Os03g0277700	Protein of unknown function DUF26 domain containing protein.	0.315364	0.32273	0.878091	1.10991	2.95288
Os04g0103500|mRNA|AK073860|CDS+3'UTR	Os04g0103500	Serine/threonine protein kinase-related domain containing protein.	0.740489	7.33287	3.67008	3.4089	3.0688
Os04g0616300|COMBINER_EST|CI435775|0	Os04g0616300	Similar to H0525G02.10 protein.	0.68634	0.814695	1.142	3.07902	6.24459
Os04g0634400|COMBINER_EST|Os04g0634400|8	Os04g0634400	Similar to H0315F07.5 protein.	4.20613	11.9739	5.01138	3.85464	2.14786
Os05g0112800|mRNA|AK108350|CDS+3'UTR	Os05g0112800	Protein of unknown function DUF26 domain containing protein.	1.47649	2.5653	2.93289	3.57406	3.62902
Os05g0165900|mRNA|AK103089|CDS+3'UTR	Os05g0165900	Serine/threonine protein kinase-related domain containing protein.	1.63762	3.84115	6.35433	4.04592	3.76329
Os05g0501400|mRNA|AK110116|CDS+3'UTR	Os05g0501400	Similar to Receptor-like protein kinase 5.	0.188125	0.218803	0.643249	1.83332	2.09968
Os06g0134700|mRNA|AK103589|CDS+3'UTR	Os06g0134700	Protein kinase, core domain containing protein.	0.874904	0.418094	0.286415	0.255447	0.243079
Os06g0690200|COMBINER_EST|CI548936|1	Os06g0690200	Serine/threonine protein kinase-related domain containing protein.	0.762658	0.461617	0.146968	0.249565	0.419523
Os09g0341100|COMBINER_EST|CI068888|6	Os09g0341100	Similar to protein kinase.	3.95761	5.02068	3.40464	5.48054	2.53216
Calcium
ProbeName	RAP_ID	Annotation (Build 5)	ratio-20 min	ratio-60 min	ratio-2 h	ratio-4 h	ratio-8 h
Os01g0134700|mRNA|AK111442|CDS+3'UTR	Os01g0134700	Calmodulin binding protein-like family protein.	9.67936	8.42047	1.47432	2.32695	1.82028
Os01g0190500|mRNA|AK119868|CDS+3'UTR	Os01g0190500	IQ calmodulin-binding region domain containing protein.	0.350965	0.284442	0.329656	0.237364	0.328776
Os01g0604500|mRNA|AK064844|CDS+3'UTR	Os01g0604500	EF-Hand type domain containing protein.	0.612908	0.564387	0.178927	0.37491	0.26946
Os01g0783700|mRNA|AK109278|CDS+3'UTR	Os01g0783700	Similar to EF-hand Ca2+-binding protein CCD1.	12.7208	11.5408	2.42391	2.42275	5.38936
Os01g0810300|mRNA|AF231026|CDS+3'UTR	Os01g0810300	Similar to Calmodulin-like protein.	4.36871	7.59841	8.82159	9.3266	9.63044
Os01g0810300|mRNA|AK070889|CDS+3'UTR	Os01g0810300	Similar to Calmodulin-like protein.	3.34003	4.90723	5.52347	5.15816	5.27375
Os01g0810300|mRNA|U37936|CDS+3'UTR	Os01g0810300	Similar to Calmodulin-like protein.	3.42563	4.91001	5.99865	5.59952	5.57011
Os01g0895600|mRNA|AK099626|CDS+3'UTR	Os01g0895600	Similar to Calreticulin 3 (Fragment).	2.03994	4.2442	3.48816	3.09781	2.28563
Os01g0939100|mRNA|AK070064|CDS+3'UTR	Os01g0939100	Similar to Calmodulin-stimulated calcium-ATPase.	0.77617	0.327627	0.316717	0.440315	0.90904
Os01g0955100|mRNA|AK062671|CDS+3'UTR	Os01g0955100	Similar to Avr9/Cf-9 rapidly elicited protein 57 (Fragment).	3.79376	3.68113	1.26833	0.917728	1.07698
Os02g0158100|mRNA|AK058991|CDS+3'UTR	Os02g0158100	Similar to EH-domain-containing protein 1.	1.50983	0.481845	0.304379	0.202458	0.244553
Os02g0158100|mRNA|AK073124|CDS+3'UTR	Os02g0158100	EF hand domain containing protein.	1.44313	0.444838	0.289299	0.185477	0.228605
Os03g0436300|COMBINER_EST|Os03g0436300|8	Os03g0436300	Similar to calmodulin binding protein.	4.89412	4.15442	2.65298	1.8772	1.46227
Os03g0743500|mRNA|AK067697|CDS+3'UTR	Os03g0743500	Similar to Calmodulin 1 (Fragment).	3.95268	4.74908	1.53931	1.64229	1.50621
Os03g0832200|mRNA|AK070712|CDS+3'UTR	Os03g0832200	Similar to Calcium-binding protein precursor (Calreticulin).	1.93823	4.27139	3.24313	1.77416	1.24828
Os05g0161200|mRNA|AB042936|CDS+3'UTR	Os05g0161200	RelA/SpoT domain containing protein.	1.37997	1.73869	1.37077	0.157348	0.0884248
Os05g0161200|mRNA|AK121808|CDS+3'UTR	Os05g0161200	RelA/SpoT domain containing protein.	1.51722	1.78908	1.39493	0.164772	0.0975393
Os05g0463300|COMBINER|CI123049|6	Os05g0463300	Hypothetical conserved gene.	0.218369	0.20061	0.24055	0.407846	0.967128
Os05g0491900|COMBINER_EST|CI225193|6	Os05g0491900	Hypothetical conserved gene.	0.302475	0.231088	0.95772	0.997639	1.41808
Os06g0256300|mRNA|AK105344|CDS+3'UTR	Os06g0256300	Similar to Calmodulin-binding heat-shock protein.	4.45769	3.45047	2.05043	0.99769	1.11211
Os07g0631700|mRNA|AK105175|CDS+3'UTR	Os07g0631700	EF-Hand type domain containing protein.	3.97129	2.74499	1.82778	2.53971	4.76672
Os08g0117400|mRNA|AY224521|CDS	Os08g0117400	Similar to Calmodulin 1 (Fragment).	0.839961	0.49707	0.45997	0.269934	0.286827
Os08g0517200|mRNA|AK121509|CDS+3'UTR	Os08g0517200	Similar to Potential calcium-transporting ATPase 9, plasma membrane-type (EC 3.6.3.8) (Ca(2+)-ATPase isoform 9).	5.97838	4.39028	1.57727	0.829452	0.733278
Os08g0558100|mRNA|AK065151|CDS+3'UTR	Os08g0558100	EF hand domain containing protein.	4.43034	5.15026	3.84239	1.92069	1.40301
Os08g0558100|mRNA|AK099458|CDS+3'UTR	Os08g0558100	EF hand domain containing protein.	4.31736	5.38903	3.56071	1.83961	1.43507
Os10g0177200|mRNA|AK064016|CDS+3'UTR	Os10g0177200	EF-HAND 2 domain containing protein.	4.87874	9.65949	6.07661	1.8877	1.51675
Os12g0547600|mRNA|AK067126|CDS+3'UTR	Os12g0547600	Hypothetical conserved gene.	19.0623	8.16237	1.86398	1.19802	0.998799
Os12g0547600|mRNA|AK067865|CDS+3'UTR	Os12g0547600	Calmodulin binding protein-like family protein.	16.0855	6.3914	1.69045	1.68546	1.27672
Os12g0603800|mRNA|AB060552|CDS+3'UTR	Os12g0603800	Similar to Calmodulin NtCaM13.	4.35419	4.93229	0.624789	0.741983	0.18436
G-protein
ProbeName	RAP_ID	Annotation (Build 5)	ratio-20 min	ratio-60 min	ratio-2 h	ratio-4 h	ratio-8 h
Os01g0265100|mRNA|AK067217|CDS+3'UTR	Os01g0265100	Similar to ADP-ribosylation factor.	0.605578	0.255494	0.18707	0.118689	0.209613
Os01g0611100|mRNA|AB015288|CDS+3'UTR	Os01g0611100	Similar to GTP-binding nuclear protein Ran-2.	12.7171	11.7199	4.11314	2.58799	1.5905
Os01g0611100|mRNA|AB015971|CDS+3'UTR	Os01g0611100	Similar to GTP-binding nuclear protein Ran-2.	3.84338	3.61029	1.92219	1.59346	1.16918
Os01g0611100|mRNA|AK072731|CDS+3'UTR	Os01g0611100	Similar to GTP-binding nuclear protein Ran-2.	3.95137	3.67209	2.05669	1.58262	1.1391
Os01g0674400|COMBINER|CI439169|2	Os01g0674400	Hypothetical conserved gene.	1.15618	4.16305	5.88391	6.29407	6.89293
Os01g0674400|COMBINER|CI439169|x	Os01g0674400	Hypothetical conserved gene.	1.7657	4.46646	5.40238	6.68792	7.54661
Os02g0632500|mRNA|AK101701|CDS+3'UTR	Os02g0632500	Arf GTPase activating protein family protein.	0.604847	0.322422	0.224069	0.244611	0.229718
Os04g0561200|mRNA|AK107862|CDS+3'UTR	Os04g0561200	Cellular retinaldehyde-binding/triple function, C-terminal domain containing protein.	2.6313	10.8805	12.4111	7.10098	4.43595
Os05g0304400|mRNA|AK073143|CDS+3'UTR	Os05g0304400	Similar to GDP dissociation inhibitor protein OsGDI2.	3.70161	3.42391	2.11326	2.39801	1.35098
Os05g0341600|mRNA|AK111385|CDS+3'UTR	Os05g0341600	Similar to Ras-related protein Rab-21.	3.92714	3.63939	2.69197	1.96747	1.53872
Os05g0349500|mRNA|AK101703|CDS+3'UTR	Os05g0349500	Pleckstrin homology-type domain containing protein.	1.58251	2.0268	2.31685	4.08079	4.03392
Os06g0234200|mRNA|AK063083|5'UTR+CDS	Os06g0234200	Similar to Rac-like GTP-binding protein 4.	3.54988	3.00217	2.5095	2.63453	2.68852
Os07g0408500|mRNA|AK103596|CDS+3'UTR	Os07g0408500	Similar to Rac GTPase activating protein 3 (Fragment).	0.702393	0.130603	0.156642	0.0875598	0.210082
Os07g0486500|mRNA|AK068175|CDS+3'UTR	Os07g0486500	RhoGAP domain containing protein.	13.1958	6.77742	4.86488	2.08504	1.11097
Os10g0377400|mRNA|AK104132|CDS+3'UTR	Os10g0377400	Similar to Ras-related protein Rab11D.	0.558867	0.37453	0.309858	0.316878	0.372825
Os10g0377400|mRNA|AK111872|CDS+3'UTR	Os10g0377400	Similar to Ras-related protein Rab11D.	0.557621	0.351299	0.317648	0.314824	0.362914
Os12g0631100|mRNA|AJ292320|CDS+3'UTR	Os12g0631100	Ras domain containing protein.	3.31247	3.19897	2.44542	1.18565	1.05791
Os12g0631100|mRNA|AK066784|CDS+3'UTR	Os12g0631100	Ras domain containing protein.	5.19533	4.8707	3.41823	1.15016	0.93217
Os12g0631100|mRNA|AY029301|CDS+3'UTR	Os12g0631100	Ras domain containing protein.	3.96728	3.7965	2.53908	1.09698	0.959672
Other kinase
ProbeName	RAP_ID	Annotation (Build 5)	ratio-20 min	ratio-60 min	ratio-2 h	ratio-4 h	ratio-8 h
Os02g0193000|COMBINER_EST|CI426747|5	Os02g0193000	Protein kinase-like domain containing protein.	3.94831	7.08595	2.0022	1.60842	1.95839
Os02g0734800|mRNA|AK109142|CDS+3'UTR	Os02g0734800	Protein of unknown function DUF26 domain containing protein.	2.88591	4.23048	3.08796	2.5106	1.92631
Os03g0221700|mRNA|AK060765|CDS+3'UTR	Os03g0221700	Serine/threonine protein kinase-related domain containing protein.	0.227667	0.30768	0.477593	0.798292	0.93339
Os03g0221700|mRNA|AK098866|CDS+3'UTR	Os03g0221700	Serine/threonine protein kinase-related domain containing protein.	0.169199	0.29188	0.55903	0.572669	0.729488
Os03g0221700|mRNA|AK098871|CDS+3'UTR	Os03g0221700	Serine/threonine protein kinase-related domain containing protein.	0.171169	0.304872	0.589288	0.625344	0.78062
Os03g0277700|mRNA|AK061148|CDS+3'UTR	Os03g0277700	Protein of unknown function DUF26 domain containing protein.	0.315364	0.32273	0.878091	1.10991	2.95288
Os03g0564600|mRNA|AK108950|CDS+3'UTR	Os03g0564600	Protein of unknown function DUF26 domain containing protein.	0.319812	0.29315	0.837716	0.343743	0.727297
Os04g0103500|mRNA|AK073860|CDS+3'UTR	Os04g0103500	Serine/threonine protein kinase-related domain containing protein.	0.740489	7.33287	3.67008	3.4089	3.0688
Os04g0634400|COMBINER_EST|Os04g0634400|8	Os04g0634400	Similar to H0315F07.5 protein.	4.20613	11.9739	5.01138	3.85464	2.14786
Os04g0659300|mRNA|AK111969|CDS+3'UTR	Os04g0659300	Protein of unknown function DUF26 domain containing protein.	0.688366	0.275136	30.8506	18.3061	13.3507
Os04g0659300|mRNA|AY303697|CDS	Os04g0659300	Protein of unknown function DUF26 domain containing protein.	0.515371	0.744052	8.74784	3.14648	2.77149
Os05g0501400|mRNA|AK110116|CDS+3'UTR	Os05g0501400	Similar to Receptor-like protein kinase 5.	0.188125	0.218803	0.643249	1.83332	2.09968
Os06g0575400|mRNA|AK111890|CDS+3'UTR	Os06g0575400	Serine/threonine protein kinase-related domain containing protein.	0.462782	0.481585	0.232391	0.136794	0.113465
Os08g0376600|COMBINER_EST|CI545300|0	Os08g0376600	Serine/threonine protein kinase domain containing protein.	0.199303	0.154762	0.90097	1.48591	2.66179
Os09g0112100|mRNA|AK120925|CDS+3'UTR	Os09g0112100	Conserved hypothetical protein.	1.80016	1.70451	1.49759	3.58196	3.11726
Os09g0458200|mRNA|AK108675|CDS+3'UTR	Os09g0458200	Conserved hypothetical protein.	0.866802	1.0975	1.82929	3.09676	3.89964
Os09g0561000|COMBINER|CI447383|0	Os09g0561000	Similar to Wall-associated kinase-like 2.	4.57566	5.10801	4.53306	1.28887	0.621952
Os09g0561600|mRNA|AK107166|CDS+3'UTR	Os09g0561600	Serine/threonine protein kinase-related domain containing protein.	4.41522	13.2878	1.93079	4.93896	4.69696
Os10g0351500|mRNA|AK102659|CDS+3'UTR	Os10g0351500	Tyrosine protein kinase domain containing protein.	1.14239	0.332441	0.168629	0.189722	0.175767
Os12g0454800|mRNA|AY572461|CDS+3'UTR	Os12g0454800	CHASE domain receptor-like serine/threonine kinase.	0.324839	0.28396	0.529355	0.534756	0.795798
