# Supplementary material for: Expression Profile in Rice Panicle: Insights into Heat Response Mechanism at Reproductive Stage
Source: PLoS One. 2012 Nov 14;7(11):e49652. doi: 10.1371/journal.pone.0049652 (PMC3498232; doi:10.1371/journal.pone.0049652)
Supplement: Table S9 — The HR ubiquitin-proteasom system genes. (XLSX) [file pone.0049652.s009.xlsx]

## Sheet: UPS genes
ProbeName	RAP_ID	Annotation (Build 5)	ratio-20 min	ratio-60 min	ratio-2 h	ratio-4 h	ratio-8 h
Os01g0209500|mRNA|AK072686|CDS+3'UTR	Os01g0209500	Nucleotide-binding, alpha-beta plait domain containing protein.	4.78861	3.04117	2.02369	1.52623	1.1665
Os01g0226400|mRNA|AK102301|CDS+3'UTR	Os01g0226400	ATPase, AAA-type, core domain containing protein.	2.31728	3.32869	2.66885	3.32524	2.5022
Os01g0251200|mRNA|AK108417|5'UTR+CDS	Os01g0251200	Hypothetical conserved gene.	5.35928	5.53302	3.81299	2.3998	1.49103
Os01g0273100|mRNA|AK105320|CDS+3'UTR	Os01g0273100	Similar to Ubiquitin conjugating protein-like (Ubiquitin-conjugating enzyme) (Ubiquitinating enzyme).	1.04604	0.262865	0.289073	0.095439	0.357793
Os01g0303600|mRNA|AK099496|CDS+3'UTR	Os01g0303600	Zinc finger, RING/FYVE/PHD-type domain containing protein.	1.62329	3.02165	3.49761	2.06979	1.60465
Os01g0637100|COMBINER_EST|Os01g0637100|8	Os01g0637100	Similar to predicted protein.	8.57346	3.28252	1.67658	0.996007	0.738505
Os01g0703300|mRNA|AK069643|CDS+3'UTR	Os01g0703300	Zinc finger, RING/FYVE/PHD-type domain containing protein.	0.468854	0.277533	3.15631	2.41291	3.09545
Os01g0703300|mRNA|AK099917|CDS+3'UTR	Os01g0703300	Zinc finger, RING/FYVE/PHD-type domain containing protein.	0.680891	0.800717	5.14831	3.30428	3.06763
Os01g0719100|mRNA|AK060327|UTR	Os01g0719100	Hypothetical gene.	17.2057	17.4944	11.7567	6.84707	5.53722
Os01g0719100|mRNA|AK062155|CDS+3'UTR	Os01g0719100	Similar to PGPD14 protein.	10.7904	14.8968	13.1529	9.71256	7.7948
Os01g0719100|mRNA|AK068005|CDS+3'UTR	Os01g0719100	Similar to PGPD14 protein.	9.90864	14.7144	11.4859	10.7574	8.44523
Os01g0719100|mRNA|AK070809|5'UTR+CDS	Os01g0719100	Similar to RING finger and CHY zinc finger domain-containing protein 1.	13.8974	20.6594	15.6934	9.39555	7.33126
Os01g0719100|mRNA|AY574990|CDS+3'UTR	Os01g0719100	Similar to RING finger and CHY zinc finger domain-containing protein 1.	10.857	14.9923	12.8145	9.26942	7.71682
Os01g0727800|mRNA|AK108195|CDS+3'UTR	Os01g0727800	Peptidase S8, subtilisin-related domain containing protein.	0.449357	0.267737	0.302974	0.189338	0.461603
Os01g0757400|mRNA|AB110177|CDS+3'UTR	Os01g0757400	Similar to Katanin p60 ATPase-containing subunit A1 (EC 3.6.4.3) (Katanin p60 subunit A1) (p60 katanin). Splice isoform 2.	0.88571	0.408289	0.31143	0.26184	0.282476
Os01g0757400|mRNA|AK058626|CDS+3'UTR	Os01g0757400	Similar to Katanin p60 ATPase-containing subunit A1 (EC 3.6.4.3) (Katanin p60 subunit A1) (p60 katanin). Splice isoform 2.	0.857344	0.384636	0.294844	0.249459	0.283273
Os01g0757400|mRNA|AK102585|CDS+3'UTR	Os01g0757400	Similar to Katanin p60 ATPase-containing subunit A1 (EC 3.6.4.3) (Katanin p60 subunit A1) (p60 katanin). Splice isoform 2.	0.852493	0.374365	0.286967	0.25183	0.274665
Os01g0795400|mRNA|AK100351|CDS+3'UTR	Os01g0795400	Similar to Subtilase.	0.172761	0.25202	1.41245	0.56247	1.01467
Os01g0803200|mRNA|U54702|CDS+3'UTR	Os01g0803200	Similar to Cysteine protease inhibitor.	0.439067	0.382007	1.05792	0.179199	0.091211
Os01g0822800|mRNA|AK065060|CDS+3'UTR	Os01g0822800	Similar to RING-H2 finger protein ATL3C.	1.72445	1.07447	1.75351	15.3369	17.6733
Os01g0833500|mRNA|AK073320|CDS+3'UTR	Os01g0833500	Similar to Serine carboxypeptidase II-1 precursor (EC 3.4.16.6) (CP-MII.1) (Fragment).	0.624747	0.758835	0.405822	0.326477	0.266203
Os01g0881900|mRNA|AK102849|CDS+3'UTR	Os01g0881900	Leucine-rich repeat, cysteine-containing containing protein.	2.38198	4.26929	3.46433	2.66617	1.90856
Os01g0893400|mRNA|AK061917|CDS+3'UTR	Os01g0893400	Zinc finger, TAZ-type domain containing protein.	11.3357	10.3351	3.33083	3.63706	1.39135
Os01g0893400|mRNA|AK071112|CDS+3'UTR	Os01g0893400	Zinc finger, TAZ-type domain containing protein.	21.6371	17.4867	5.71977	5.05553	3.84951
Os01g0902200|mRNA|AK064932|CDS+3'UTR	Os01g0902200	Peptidase M3A and M3B, thimet/oligopeptidase F domain containing protein.	3.85201	3.89901	2.57398	1.69892	1.24723
Os01g0902200|mRNA|AK064934|CDS+3'UTR	Os01g0902200	Peptidase M3A and M3B, thimet/oligopeptidase F domain containing protein.	3.51683	3.31389	1.8201	0.947267	0.689464
Os01g0914700|mRNA|AK069261|CDS+3'UTR	Os01g0914700	Peptidase A22B, signal peptide peptidase domain containing protein.	0.263647	0.182234	0.218557	0.366081	0.429085
Os01g0971400|mRNA|AK059528|CDS+3'UTR	Os01g0971400	Similar to Cysteine proteinase.	0.286906	0.271677	0.631826	0.962465	1.36481
Os01g0971400|mRNA|AK106011|CDS+3'UTR	Os01g0971400	Similar to Cysteine proteinase.	0.274462	0.257708	0.610668	0.952508	1.36485
Os01g0971400|mRNA|AK119182|CDS+3'UTR	Os01g0971400	Similar to Cysteine proteinase.	0.286521	0.26869	0.621873	0.941588	1.37381
Os02g0132300|mRNA|AK106973|CDS+3'UTR	Os02g0132300	Similar to Erythrocyte membrane protein PFEMP3 (Fragment).	2.17766	3.6518	3.56446	3.82883	3.09046
Os02g0179400|COMBINER|CI181233|6	Os02g0179400	Similar to Tubby-like protein 4.	0.760494	0.396327	0.283706	0.309694	0.335314
Os02g0225500|COMBINER_EST|Os02g0225500|8	Os02g0225500	Conserved hypothetical protein.	1.35473	1.43951	0.821089	6.72027	6.99328
Os02g0490000|mRNA|AK106789|CDS+3'UTR	Os02g0490000	Zinc finger, RING/FYVE/PHD-type domain containing protein.	0.476311	0.353816	0.680038	0.139184	0.131579
Os02g0619600|mRNA|AK072178|CDS+3'UTR	Os02g0619600	Zinc finger, RING/FYVE/PHD-type domain containing protein.	0.767391	0.949091	0.66153	0.246085	0.280877
Os02g0634700|mRNA|AK069959|CDS+3'UTR	Os02g0634700	Similar to Serine carboxypeptidase II-like protein.	0.417817	0.467062	0.759506	3.72722	3.45783
Os02g0634700|mRNA|AK104329|CDS+3'UTR	Os02g0634700	Similar to Serine carboxypeptidase II-like protein.	0.528665	0.489517	0.858871	3.11994	3.1601
Os02g0634700|mRNA|AK104431|CDS+3'UTR	Os02g0634700	Similar to Serine carboxypeptidase II-like protein.	0.477076	0.53569	0.856709	3.32808	3.17131
Os02g0645000|mRNA|AK111136|CDS+3'UTR	Os02g0645000	Zinc finger, RING/FYVE/PHD-type domain containing protein.	0.360832	0.406899	0.275178	0.241324	0.266921
Os02g0671100|mRNA|AK100120|CDS+3'UTR	Os02g0671100	Cyclin-like F-box domain containing protein.	1.90535	4.25381	14.2207	2.23829	4.32948
Os02g0687900|mRNA|AK064814|CDS+3'UTR	Os02g0687900	Peptidase S10, serine carboxypeptidase family protein.	0.60701	0.518742	0.571693	0.332991	0.236682
Os02g0740300|mRNA|AK067833|CDS+3'UTR	Os02g0740300	ATPase, AAA-type, core domain containing protein.	7.87508	13.7034	8.74005	4.03954	2.34945
Os02g0779200|mRNA|AK106527|CDS+3'UTR	Os02g0779200	Similar to Subtilisin protease (Fragment).	0.536293	0.484316	0.315015	0.322268	0.289326
Os02g0798800|COMBINER_EST|CI553009|6	Os02g0798800	Leucine-rich repeat, cysteine-containing subtype containing protein.	2.90489	3.82858	3.34533	3.70142	3.42183
Os02g0815700|mRNA|AK065514|CDS+3'UTR	Os02g0815700	Similar to C-terminal protease precursor.	0.884198	1.63085	1.00507	0.19245	0.299598
Os03g0123100|mRNA|AK062161|CDS+3'UTR	Os03g0123100	Similar to SUMO E2 conjugating enzyme SCE1.	1.06544	0.513832	0.342445	0.307494	0.141413
Os03g0188200|mRNA|AK058578|CDS+3'UTR	Os03g0188200	Zinc finger, RING/FYVE/PHD-type domain containing protein.	3.82862	3.52603	1.742	0.991681	0.844473
Os03g0192100|mRNA|AK064747|CDS+3'UTR	Os03g0192100	Similar to Serine carboxypeptidase family protein, expressed.	1.18906	4.06857	3.2731	2.85012	2.25755
Os03g0240600|mRNA|AK109161|CDS+3'UTR	Os03g0240600	Zinc finger, RING/FYVE/PHD-type domain containing protein.	7.47896	12.1117	1.07663	0.625627	0.897197
Os03g0264800|COMBINER_EST|Os03g0264800|8	Os03g0264800	Similar to ATPase, AAA family protein, expressed.	1.66334	0.521545	0.253354	0.358277	0.305495
Os03g0272300|mRNA|AK071865|CDS+3'UTR	Os03g0272300	Zinc finger, RING/FYVE/PHD-type domain containing protein.	7.82329	5.83029	3.50829	1.61196	1.43622
Os03g0324900|mRNA|AK068144|CDS+3'UTR	Os03g0324900	Zinc finger, RING/FYVE/PHD-type domain containing protein.	18.8339	22.5967	23.2207	8.19968	14.5118
Os03g0386800|mRNA|AK066671|CDS+3'UTR	Os03g0386800	Peptidase S10, serine carboxypeptidase family protein.	0.724546	0.526109	0.406575	0.310099	0.31598
Os03g0729000|mRNA|AK108046|CDS+3'UTR	Os03g0729000	Conserved hypothetical protein.	76.8239	17.7687	12.584	2.79424	2.96195
Os03g0730400|mRNA|AK104942|CDS+3'UTR	Os03g0730400	Similar to Serine carboxypeptidase family protein, expressed.	0.740036	0.604534	0.383508	0.187186	0.197964
Os03g0730500|mRNA|AK066477|CDS+3'UTR	Os03g0730500	Peptidase S10, serine carboxypeptidase family protein.	0.543527	0.319409	0.371644	0.209724	0.348837
Os03g0741700|COMBINER_EST|CI363564|6	Os03g0741700	Hypothetical conserved gene.	5.81684	3.15046	1.78856	1.16116	1.12574
Os03g0802200|mRNA|AK111769|CDS+3'UTR	Os03g0802200	Conserved hypothetical protein.	13.9906	19.6714	11.4442	3.07323	2.70504
Os03g0813700|COMBINER|CI464077|6	Os03g0813700	Proteinase inhibitor I29, cathepsin propeptide domain containing protein.	0.30677	0.362262	3.63086	2.27683	1.86973
Os04g0121100|COMBINER_EST|Os04g0121100|8	Os04g0121100	Similar to OSIGBa0115D20.4 protein.	0.465769	0.148438	0.145983	0.122291	0.226544
Os04g0393300|mRNA|AK059881|CDS+3'UTR	Os04g0393300	Membrane-anchored ubiquitin-fold protein, HCG-1 domain containing protein.	1.1668	1.61718	1.95885	3.38395	3.75974
Os04g0448500|COMBINER_EST|CI469008|0	Os04g0448500	Peptidase A1 domain containing protein.	0.0577707	0.0674478	1.94491	4.15137	7.08094
Os04g0543700|mRNA|AK106823|CDS+3'UTR	Os04g0543700	Similar to Serine proteinase (Fragment).	0.15586	0.350416	3.18208	1.99141	16.4045
Os04g0543700|mRNA|AY644644|CDS+3'UTR	Os04g0543700	Similar to Serine proteinase (Fragment).	0.146206	0.191926	1.89442	1.37807	7.1625
Os04g0543700|mRNA|AY683198|CDS+3'UTR	Os04g0543700	Similar to Serine proteinase (Fragment).	0.159064	0.191043	1.9471	1.69423	7.9927
Os04g0589700|mRNA|AK070506|CDS+3'UTR	Os04g0589700	Zinc finger, RING/FYVE/PHD-type domain containing protein.	1.83789	1.66552	1.85818	7.77888	4.6613
Os04g0684800|mRNA|AK058755|UTR	Os04g0684800	Non-protein coding transcript.	0.708224	1.17487	1.87672	3.1832	4.34886
Os05g0137400|mRNA|AK065206|CDS+3'UTR	Os05g0137400	Similar to Aspartic protease precursor.	2.08215	4.13375	3.52315	3.40337	2.47548
Os05g0158500|mRNA|AK106800|CDS+3'UTR	Os05g0158500	Peptidase S10, serine carboxypeptidase family protein.	0.693366	0.10667	0.0835237	0.100062	0.155508
Os05g0163400|mRNA|AK073342|CDS+3'UTR	Os05g0163400	Zinc finger, RING/FYVE/PHD-type domain containing protein.	0.721844	0.275614	0.291772	0.227314	0.394052
Os05g0163400|mRNA|AK120340|CDS+3'UTR	Os05g0163400	Zinc finger, RING/FYVE/PHD-type domain containing protein.	0.688917	0.284443	0.304713	0.271194	0.414414
Os05g0279400|mRNA|AK102650|CDS+3'UTR	Os05g0279400	Zinc finger, RING-type domain containing protein.	7.92482	4.72483	3.18151	1.75484	1.12844
Os05g0368700|mRNA|AK064686|CDS+3'UTR	Os05g0368700	Similar to Subtilisin-like protease (Fragment).	0.103636	0.0109606	0.172883	4.00742	4.07097
Os05g0435800|mRNA|AK067138|CDS+3'UTR	Os05g0435800	Similar to Subtilisin-like protease.	0.148962	0.20757	0.345559	0.73509	0.775874
Os05g0439400|mRNA|AK121082|CDS+3'UTR	Os05g0439400	Similar to Arm repeat containing protein.	3.15296	3.52105	1.8682	1.79028	1.79179
Os05g0478000|mRNA|AK111029|CDS+3'UTR	Os05g0478000	Zinc finger, RING/FYVE/PHD-type domain containing protein.	0.291406	0.330298	0.779862	1.57019	1.94725
Os05g0521500|mRNA|AK066030|CDS+3'UTR	Os05g0521500	Peptidase S16, lon N-terminal domain containing protein.	3.08757	3.12853	2.47696	2.65012	1.56111
Os05g0533900|mRNA|AK106477|CDS+3'UTR	Os05g0533900	Similar to CLP protease regulatory subunit CLPX precursor.	3.49576	3.73472	3.40796	4.39778	3.5041
Os05g0568900|mRNA|AK061450|CDS+3'UTR	Os05g0568900	Similar to Protease Do-like 1, chloroplast precursor (EC 3.4.21.-).	8.69067	4.49375	2.1482	1.23347	1.10552
Os05g0568900|mRNA|AK067365|CDS+3'UTR	Os05g0568900	Similar to Protease Do-like 1, chloroplast precursor (EC 3.4.21.-).	8.01444	5.76321	3.03486	1.1472	0.959675
Os05g0568900|mRNA|AK120626|CDS+3'UTR	Os05g0568900	Similar to Protease Do-like 1, chloroplast precursor (EC 3.4.21.-).	8.87037	4.50753	1.98866	1.28138	1.19614
Os05g0584600|mRNA|AK072537|CDS+3'UTR	Os05g0584600	ATPase, AAA-type, core domain containing protein.	0.590971	0.588704	0.4256	0.236004	0.253978
Os05g0590100|mRNA|AK072823|CDS+3'UTR	Os05g0590100	Ubiquitin domain containing protein.	0.260964	0.39389	0.262877	0.192835	0.451704
Os06g0101300|mRNA|AK121897|CDS+3'UTR	Os06g0101300	Zinc finger, RING/FYVE/PHD-type domain containing protein.	5.9516	3.55965	2.31146	1.25947	1.24208
Os06g0159600|mRNA|AK068486|CDS+3'UTR	Os06g0159600	Tetratricopeptide-like helical domain containing protein.	1.21072	1.59854	1.79108	4.44552	5.24369
Os06g0159600|mRNA|AK108446|CDS+3'UTR	Os06g0159600	Hypothetical conserved gene.	3.64595	3.78146	3.39529	4.10571	3.46537
Os06g0159900|mRNA|AK063418|CDS+3'UTR	Os06g0159900	Similar to Arm repeat containing protein.	41.095	24.1452	14.831	5.2138	2.16701
Os06g0160000|COMBINER_EST|Os06g0160000|8	Os06g0160000	Conserved hypothetical protein.	1.3884	0.880439	0.511794	0.313097	0.305331
Os06g0229000|mRNA|AK063733|CDS+3'UTR	Os06g0229000	Similar to FtsH protease (VAR2) (Zinc dependent protease).	204.184	81.2804	37.5748	15.486	6.72652
Os06g0505400|mRNA|AK068107|CDS+3'UTR	Os06g0505400	Abortive infection protein family protein.	1.17524	0.77737	0.462753	0.332921	0.267545
Os06g0506600|mRNA|AK066232|CDS+3'UTR	Os06g0506600	Similar to Ubiquitin-conjugating enzyme E2-17 kDa 8 (EC 6.3.2.19) (Ubiquitin- protein ligase 8) (Ubiquitin carrier protein 8) (UBCAT4A).	11.4918	7.77077	5.18035	2.51703	1.72168
Os06g0535200|mRNA|AK109943|CDS+3'UTR	Os06g0535200	Zinc finger, RING/FYVE/PHD-type domain containing protein.	1.52311	5.87739	6.73742	9.0196	4.58698
Os06g0578100|COMBINER_EST|Os06g0578100|8	Os06g0578100	Similar to Retrotransposon protein.	2.33707	1.1734	1.70117	4.47993	7.25917
Os06g0594400|mRNA|AK065435|CDS+3'UTR	Os06g0594400	Kelch-type beta propeller domain containing protein.	27.3218	13.8921	18.807	12.0948	7.8622
Os06g0594400|mRNA|AK072246|CDS+3'UTR	Os06g0594400	Kelch-type beta propeller domain containing protein.	14.8007	7.99491	12.0737	5.11129	4.29996
Os06g0647400|mRNA|AK103281|CDS+3'UTR	Os06g0647400	Similar to Lysosomal Pro-X carboxypeptidase.	0.256251	0.303757	0.533357	1.25008	1.21044
Os06g0687200|mRNA|AK058749|CDS+3'UTR	Os06g0687200	Zinc finger, RING/FYVE/PHD-type domain containing protein.	0.649494	0.539017	3.83778	2.04881	6.00327
Os07g0258700|mRNA|AK069407|CDS+3'UTR	Os07g0258700	BTB domain containing protein.	1.664	2.24303	2.76827	4.82235	3.42846
Os07g0258700|mRNA|AK106061|CDS+3'UTR	Os07g0258700	BTB domain containing protein.	1.60676	2.2322	2.38332	5.53345	3.24934
Os07g0285700|mRNA|AK108035|CDS+3'UTR	Os07g0285700	Cyclin-like F-box domain containing protein.	1.04782	0.754029	0.328492	0.411051	0.288287
Os07g0498800|mRNA|AB078881|CDS+3'UTR	Os07g0498800	Similar to Calreticulin interacted protein.	3.37647	3.68891	2.34565	2.49088	1.55867
Os07g0498800|mRNA|AK065220|CDS+3'UTR	Os07g0498800	Similar to Calreticulin interacted protein.	3.60987	3.5753	2.34315	2.29681	1.35284
Os07g0498800|mRNA|AK072589|5'UTR+CDS	Os07g0498800	Similar to Calreticulin interacted protein.	5.46105	5.18641	2.82881	2.06839	1.15774
Os07g0498800|mRNA|AY224569|5'UTR+CDS	Os07g0498800	Similar to Calreticulin interacted protein.	3.93036	3.72762	2.38305	1.73583	1.13633
Os07g0517600|COMBINER_EST|Os07g0517600|8	Os07g0517600	Similar to mitochondrial protein.	0.749659	0.592161	0.459146	0.287474	0.230029
Os07g0561300|mRNA|AK072982|CDS+3'UTR	Os07g0561300	Cyclin-like F-box domain containing protein.	36.8967	14.7658	5.05927	3.45717	1.49823
Os07g0603500|COMBINER_EST|Os07g0603500|8	Os07g0603500	Hypothetical conserved gene.	1.89365	1.44245	1.52766	4.89098	10.594
Os07g0631200|mRNA|AK120260|CDS+3'UTR	Os07g0631200	Zinc finger, RING/FYVE/PHD-type domain containing protein.	52.1232	17.9467	15.0548	10.6093	10.7608
Os07g0661600|mRNA|AK061123|CDS+3'UTR	Os07g0661600	Similar to RNA-binding protein-like protein.	5.94685	4.72943	3.662	2.28652	1.71969
Os07g0661600|mRNA|AK065465|CDS+3'UTR	Os07g0661600	Similar to RNA-binding protein.	6.11619	4.91476	4.07345	2.1875	1.7306
Os07g0661600|mRNA|AK104664|CDS+3'UTR	Os07g0661600	Similar to RNA-binding protein-like protein.	5.75914	4.32473	3.61133	2.18111	1.69337
Os08g0113300|mRNA|AK106523|CDS+3'UTR	Os08g0113300	Similar to Clone ZZD1296 mRNA sequence.	5.7171	6.97533	4.77218	2.9951	2.18813
Os08g0149000|mRNA|AK100458|CDS+3'UTR	Os08g0149000	Peptidase, trypsin-like serine and cysteine domain containing protein.	1.46152	2.7581	3.15238	4.57443	3.18661
Os08g0185900|mRNA|AK108323|CDS+3'UTR	Os08g0185900	Ubiquitin domain containing protein.	1.03903	1.16601	1.69656	3.07391	5.87167
Os08g0193500|COMBINER_EST|Os08g0193500|8	Os08g0193500	Hypothetical conserved gene.	8.2604	4.40464	2.49353	1.31057	1.05889
Os08g0197100|mRNA|AK110883|CDS+3'UTR	Os08g0197100	Cyclin-like F-box domain containing protein.	0.740859	0.494087	0.728682	0.256705	0.255211
Os08g0197400|mRNA|AK069625|CDS+3'UTR	Os08g0197400	Conserved hypothetical protein.	0.794259	0.220638	0.208007	0.258312	0.295486
Os08g0197500|mRNA|AK068342|CDS+3'UTR	Os08g0197500	Cyclin-like F-box domain containing protein.	0.829197	0.297291	0.306714	0.378188	0.548818
Os08g0375700|mRNA|AY600992|CDS+3'UTR	Os08g0375700	BTB/POZ fold domain containing protein.	0.687541	0.723188	11.4067	2.06295	9.57664
Os08g0428100|COMBINER_EST|CI342796|6	Os08g0428100	Hypothetical conserved gene.	1.67549	3.91918	5.87844	1.73625	1.28095
Os08g0500800|mRNA|AK101328|CDS+3'UTR	Os08g0500800	WLM domain containing protein.	6.34426	4.53499	3.10414	1.9587	1.45864
Os08g0506000|mRNA|AK073328|CDS+3'UTR	Os08g0506000	Ovarian tumour, otubain domain containing protein.	17.8172	6.21442	4.25216	2.37038	1.3959
Os08g0527300|mRNA|AK121686|CDS+3'UTR	Os08g0527300	Peptidase C19, ubiquitin carboxyl-terminal hydrolase 2 family protein.	0.83179	0.4354	0.424764	0.248401	0.247619
Os08g0527900|COMBINER_EST|Os08g0527900|8	Os08g0527900	Peptidase C19, ubiquitin carboxyl-terminal hydrolase 2 family protein.	0.612875	0.425345	0.531183	0.303429	0.324311
Os08g0546400|mRNA|AK070009|CDS+3'UTR	Os08g0546400	UBX domain containing protein.	4.32641	3.72798	2.80987	1.63958	1.33516
Os09g0453700|mRNA|AK068857|CDS+3'UTR	Os09g0453700	Peptidase S9A, prolyl oligopeptidase family protein.	1.03093	1.5841	1.26382	3.12799	3.78115
Os09g0475700|mRNA|AK110073|CDS+3'UTR	Os09g0475700	Peptidase S9A, prolyl oligopeptidase family protein.	0.991704	0.582849	0.30954	0.3224	0.250237
Os09g0530800|COMBINER_EST|Os09g0530800|8	Os09g0530800	Similar to predicted protein.	1.0481	0.526387	0.317186	0.191035	0.148223
Os09g0554200|mRNA|AK108361|CDS+3'UTR	Os09g0554200	Zinc finger, RING/FYVE/PHD-type domain containing protein.	1.70281	2.47347	3.42042	2.73998	3.85591
Os09g0562700|mRNA|AK108733|CDS+3'UTR	Os09g0562700	Similar to Pre-pro-TPE4A protein precursor.	1.15066	1.14418	1.00736	0.216111	0.148701
Os09g0565300|COMBINER|CI545171|6	Os09g0565300	Similar to RING-finger protein.	11.0045	10.1727	2.81411	2.03388	1.33415
Os10g0415800|mRNA|AK061694|CDS+3'UTR	Os10g0415800	Similar to Prolyl oligopeptidase family protein, expressed.	0.654848	0.306429	0.327856	0.33721	0.475799
Os10g0445400|mRNA|AK067013|CDS+3'UTR	Os10g0445400	Zinc finger, RING/FYVE/PHD-type domain containing protein.	0.299954	0.999764	2.0613	7.36292	5.62284
Os10g0456800|mRNA|AK071137|CDS+3'UTR	Os10g0456800	Similar to PGPD14 protein.	0.441202	1.73204	5.4086	11.0519	8.28858
Os10g0456800|mRNA|AK104810|CDS+3'UTR	Os10g0456800	Similar to PGPD14 protein.	0.451625	1.80045	5.27375	11.6273	8.07501
Os10g0464900|COMBINER|CI271197|6	Os10g0464900	Zinc finger, RING/FYVE/PHD-type domain containing protein.	3.58153	9.19435	0.94764	0.159471	0.750385
Os10g0475900|mRNA|AK101853|CDS+3'UTR	Os10g0475900	Ubiquitin domain containing protein.	1.15419	1.33956	1.9142	3.75157	3.20745
Os10g0511600|mRNA|AK073197|CDS+3'UTR	Os10g0511600	Peptidase S28 family protein.	0.834842	0.495616	0.391798	0.290095	0.277944
Os10g0520600|mRNA|AK061230|CDS+3'UTR	Os10g0520600	UBX domain containing protein.	4.17744	3.04856	2.07405	1.38041	1.13711
Os10g0520600|mRNA|AK071110|CDS+3'UTR	Os10g0520600	Similar to fas-associated factor 1-like protein.	4.22527	3.11933	2.1033	1.41609	1.15089
Os11g0111900|mRNA|AK061535|CDS+3'UTR	Os11g0111900	BTB domain containing protein.	0.24336	0.543188	2.96219	3.66829	4.16382
Os11g0111900|mRNA|AK104218|CDS+3'UTR	Os11g0111900	BTB domain containing protein.	0.452803	0.698002	3.37789	2.57812	3.17577
Os11g0183900|mRNA|AK061884|CDS+3'UTR	Os11g0183900	Similar to Nucellin-like aspartic protease (Fragment).	6.68987	6.0439	1.47903	1.07936	1.0465
Os11g0183900|mRNA|AK068348|CDS+3'UTR	Os11g0183900	Similar to Aspartic proteinase Asp1 precursor (EC 3.4.23.-) (OsAsp1) (Nucellin- like protein).	5.66181	9.39805	6.30127	6.32519	4.48017
Os11g0184600|COMBINER_EST|Os11g0184600|8	Os11g0184600	Similar to Aspartic proteinase Asp1.	2.66878	4.83734	3.27021	4.24596	2.45313
Os11g0230700|COMBINER|CI470608|4	Os11g0230700	Serpin-Z6B.	1.38076	1.11429	0.309822	0.177094	0.247307
Os11g0230700|COMBINER|CI470608|x	Os11g0230700	Serpin-Z6B.	1.51422	1.11175	0.596586	0.173001	0.274639
Os11g0433200|mRNA|AK067867|CDS+3'UTR	Os11g0433200	Similar to Growth-on protein GRO10.	0.774652	0.432782	0.242942	0.164447	0.160933
Os11g0547000|mRNA|AK065369|CDS+3'UTR	Os11g0547000	Hypothetical conserved gene.	1.30201	1.02718	2.85745	13.5219	11.1886
Os11g0547000|mRNA|AK100677|CDS+3'UTR	Os11g0547000	Similar to FKF1.	1.28038	0.948251	2.79042	14.1026	10.8769
Os11g0582100|mRNA|AK068669|CDS+3'UTR	Os11g0582100	Zinc finger, RING/FYVE/PHD-type domain containing protein.	6.33963	4.74487	3.11984	2.34727	2.45873
Os11g0687100|mRNA|AK065631|CDS+3'UTR	Os11g0687100	von Willebrand factor, type A domain containing protein.	0.671634	0.633681	0.811798	0.237032	0.165167
Os12g0267900|mRNA|AK072042|CDS+3'UTR	Os12g0267900	Zinc finger, RING/FYVE/PHD-type domain containing protein.	1.33399	0.2598	0.361519	0.239722	0.490108
Os12g0601000|COMBINER_EST|Os12g0601000|8	Os12g0601000	Similar to Leucine Rich Repeat family protein, expressed.	0.813247	0.230382	0.178989	0.190795	0.150021
Os12g0628500|mRNA|AK122063|CDS+3'UTR	Os12g0628500	Similar to Methionine aminopeptidase-like protein.	0.651663	0.853008	0.64366	6.25533	3.56792
